# Supplementary material for: Pd-catalyzed access to mono- and di-fluoroallylic amines from primary anilines
Source: Royal Society of Chemistry journal article supplement (doi:10.1039/d2cc05844h), 2022-12-16

## Supporting Information

# Pd-catalyzed access to mono- and di-fluoroallylic amines from primary anilines

Xingben Wang, Frederic W. Patureau \*

*Institute of Organic Chemistry, RWTH Aachen University, Landoltweg 1, 52074 Aachen, Germany.*

*E-mail: [Frederic.Patureau@rwth-aachen.de](mailto:Frederic.Patureau@rwth-aachen.de)*

## Table of Contents

1. General information (S2)
2. Optimization (S2)
3. Preparation of some starting materials (S3)
4. General procedure for **c** (S3)
5. Product characterization of **c** (S3)
6. General procedure for **d** (S17)
7. Product characterization of **d** (S18)
8. Transformation of products (S30)
9. Kinetic orders (S32)
10. References (S34)
11. Copies of  $^1\text{H}$ ,  $^{13}\text{C}$ , and  $^{19}\text{F}$  spectra (S35)

## 1. General information

NMR spectra were obtained on an Agilent VNMRS 400 or a Bruker Av 600 using CDCl<sub>3</sub> as solvents. Chemical shifts are given in ppm and coupling constants (*J*) in Hz. <sup>1</sup>H spectra were calibrated in relation to the reference measurement of TMS (0.00 ppm). <sup>13</sup>C spectra were calibrated in relation to the deuterated solvent, namely CDCl<sub>3</sub> (77.16 ppm). The following abbreviations were used for <sup>1</sup>H NMR spectra to indicate the signal multiplicity: s (singlet), d (doublet), t (triplet), q (quartet) and m (multiplet) as well as combinations of them. Flash chromatography was performed on silica gel (60 M, 0.04-0.063 mm) by standard technique. All the chemicals used for synthesis were purchased from Sigma Aldrich, abcr, Alfa Aesar, TCI, Fisher, or chemPUR. Pd(dba)<sub>2</sub> was purchased from Sigma Aldrich. High resolution mass spectra (HRMS) were obtained on a Thermo Scientific LTQ Orbitrap XL spectrometer.

## 2. Optimization

**Table S1** Optimization towards mono- or di-2-fluoroallylic amines.<sup>a</sup>

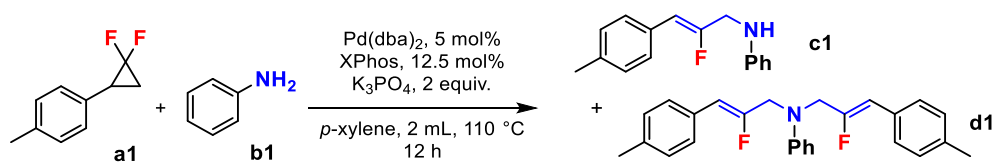

| Entry          | a1:b1 | c1 yield (%) <sup>b</sup> | d1 yield (%) <sup>b</sup> | c1:d1 <sup>b</sup> |
|----------------|-------|---------------------------|---------------------------|--------------------|
| 1              | 1:1   | 29                        | 4                         | 7.25:1             |
| 2              | 1:2   | 54                        | 2                         | >20:1              |
| 3              | 1:3   | 90(89) <sup>c</sup>       | 2                         | >20:1              |
| 4 <sup>d</sup> | 1:3   | < 10                      | -                         | -                  |
| 5              | 2:1   | 1                         | 75                        | <1:20              |
| 6              | 3:1   | 1                         | 90(90) <sup>c</sup>       | <1:20              |
| 7 <sup>e</sup> | 1:2   | 18                        | <5                        | -                  |
| 8 <sup>e</sup> | 3:1   | 6                         | <5                        | -                  |

<sup>a</sup> Reaction conditions: **a1** (0.20 mmol), **b1** (0.20 mmol), catalyst (5 mol%), XPhos ligand (12.5 mol %), K<sub>3</sub>PO<sub>4</sub> (2 equiv.) in *p*-xylene (2.0 mL) at 110 °C for 12 h. <sup>b</sup> determined by <sup>1</sup>H NMR, using CH<sub>2</sub>Br<sub>2</sub> as an internal standard. <sup>c</sup> isolated yields. <sup>d</sup> XPhos loading reduced to 5 mol%. <sup>e</sup> Fu's typical conditions: Pd(OTFA)<sub>2</sub> (10 mol%), *t*Bu-XPhos (10 mol%), K<sub>2</sub>CO<sub>3</sub> (2 equiv.), CH<sub>3</sub>CN (1 mL), 80 °C, N<sub>2</sub> atm, 16 h.

### 3. Preparation of some starting materials

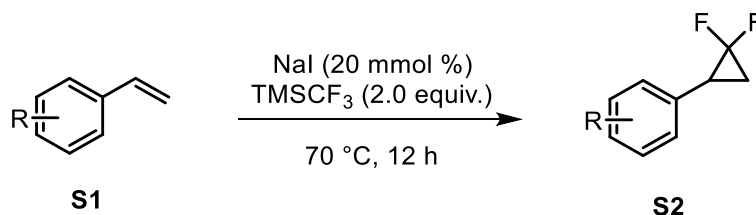

According to a known procedure,<sup>[1-2]</sup> a schlenk-tube (50 mL) was charged with **S1** (10 mmol), NaI (2 mmol, 300 mg) and TMSCF<sub>3</sub> (20 mmol). The mixture was heated up to 70 °C. the reaction was stirred (12 h) and simultaneously allowed to acclimatize to room temperature. The reaction was quenched with water (20 mL), extracted with ethyl acetate (3x 10 mL), dried over MgSO<sub>4</sub> and concentrated under reduced pressure. The crude was purified by SiO<sub>2</sub> gel column chromatography to afford **S2**.

### 4. General procedure for c

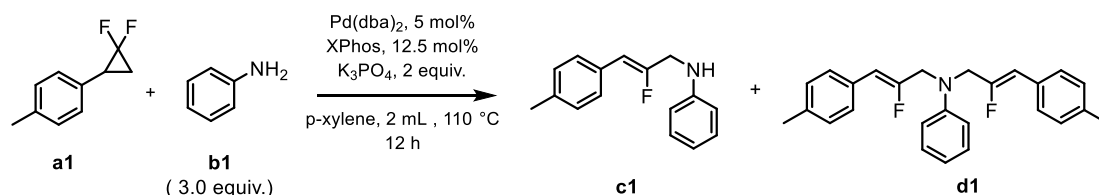

Under N<sub>2</sub> atmosphere, XPhos (11.9 mg, 0.025 mmol) and Pd(dba)<sub>2</sub> (5.7 mg, 0.01 mmol), gem-difluorocyclopropanes **a1** (0.2 mmol), aniline<sup>[3]</sup> **b1** (0.6 mmol), K<sub>3</sub>PO<sub>4</sub> (2.0 equiv., 84.8 mg) were dissolved in 2 mL p-xylene, then the mixture was stirred at 110 °C for about 12 h to the starting material was consumed (monitored by TLC), the mixture was filtered through celite and the filtrate was concentrated to dryness. A portion of the residue was analyzed with <sup>1</sup>H NMR to determine selectivity and recovered. The crude was purified by column chromatography to give the products **c**.

### 5. Product characterization of c

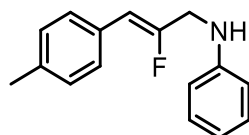

**(Z)-N-(2-fluoro-3-(p-tolyl)allyl)aniline**

**c1**: The crude mixture was purified by SiO<sub>2</sub> gel column chromatography with pentane/EA (from 60:1). 43 mg product was obtained by 89% isolated yield as yellow solid.

<sup>1</sup>H NMR (600 MHz, Chloroform-d) δ 7.43 (d, *J* = 7.9 Hz, 2H), 7.25 (t, *J* = 7.9 Hz, 2H), 7.18 (d, *J* = 7.8 Hz, 2H), 6.81 (t, *J* = 7.3 Hz, 1H), 6.74 (d, *J* = 7.9 Hz, 2H), 5.77 (d, *J* = 39.6 Hz, 1H), 4.05 (s, 1H) 4.04 (d, *J* = 9.8 Hz, 2H), 2.38 (s, 3H).

<sup>19</sup>F NMR (565 MHz, Chloroform-d) δ -110.50 (dt, *J* = 39.7 Hz, *J* = 9.9 Hz).

<sup>13</sup>C NMR (151 MHz, Chloroform-d) δ 156.6 (d, *J* = 266.5 Hz), 147.3, 137.1 (d, *J* = 2.4 Hz), 130.1 (d, *J*

= 2.7 Hz), 129.3, 129.2, 128.5 (d,  $J = 6.9$  Hz), 118.3, 113.2, 106.8 (d,  $J = 6.7$  Hz), 45.6 (d,  $J = 33.4$  Hz), 21.3.

**IR** (neat,  $\text{cm}^{-1}$ ):  $\tilde{\nu}$ : 3416, 2918, 1694, 1599, 1501, 1433, 1312, 1249, 1153, 1103, 989, 862, 744.

**ESI-HRMS**: mass spectrometry:  $m/z$  calcd for  $\text{C}_{16}\text{H}_{17}\text{NF}$   $[\text{M}+\text{H}]^+$  242.13395, measured 242.13329.

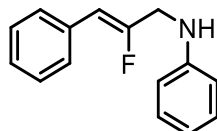

**(Z)-N-(2-fluoro-3-phenylallyl)aniline**

**c2**: The crude mixture was purified by  $\text{SiO}_2$  gel column chromatography with pentane/EA (from 60:1). 39 mg product was obtained by 86% isolated yield as yellow oil.

**$^1\text{H}$  NMR** (600 MHz, Chloroform- $d$ )  $\delta$  7.39 (d,  $J = 6.9$  Hz, 2H), 7.23 (t,  $J = 7.7$  Hz, 2H), 7.16 – 7.09 (m, 3H), 6.68 (t,  $J = 7.4$  Hz, 1H), 6.60 (d,  $J = 7.5$  Hz, 2H), 5.67 (d,  $J = 39.5$  Hz, 1H), 3.92 (s, 1H), 3.91 (d,  $J = 10.3$  Hz, 2H).

**$^{19}\text{F}$  NMR** (565 MHz, Chloroform- $d$ )  $\delta$  -109.53 (dt,  $J = 39.4$  Hz,  $J = 9.7$  Hz).

**$^{13}\text{C}$  NMR** (151 MHz, Chloroform- $d$ )  $\delta$  157.2 (d,  $J = 267.7$  Hz), 147.2, 133.0 (d,  $J = 2.8$  Hz), 129.4, 128.6 (d,  $J = 7.0$  Hz), 128.5, 127.3 (d,  $J = 1.8$  Hz), 118.3, 113.2, 106.8 (d,  $J = 6.6$  Hz), 45.5 (d,  $J = 33.8$  Hz).

**IR** (neat,  $\text{cm}^{-1}$ ):  $\tilde{\nu}$ : 3418, 2920, 1694, 1601, 1504, 1439, 1315, 1263, 1105, 870, 749.

**ESI-HRMS**: mass spectrometry:  $m/z$  calcd for  $\text{C}_{15}\text{H}_{15}\text{NF}$   $[\text{M}+\text{H}]^+$  228.11830, measured 228.11794.

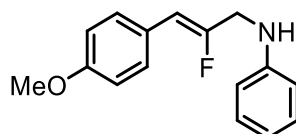

**(Z)-N-(2-fluoro-3-(4-methoxyphenyl)allyl)aniline**

**c3**: The crude mixture was purified by  $\text{SiO}_2$  gel column chromatography with pentane/EA (from 40:1). 36 mg product was obtained by 70% isolated yield as brown solid.

**$^1\text{H}$  NMR** (600 MHz, Chloroform- $d$ )  $\delta$  7.34 (d,  $J = 8.7$  Hz, 2H), 7.15 – 7.07 (m, 2H), 6.77 (d,  $J = 8.8$  Hz, 2H), 6.68 (t,  $J = 7.4$  Hz, 1H), 6.61 (d,  $J = 7.6$  Hz, 2H), 5.62 (d,  $J = 39.7$  Hz, 1H), 3.94 (broad s, 1H), 3.91 (d,  $J = 10.6$  Hz, 2H), 3.72 (s, 3H).

**$^{19}\text{F}$  NMR** (565 MHz, Chloroform- $d$ )  $\delta$  -112.41 (dt,  $J = 39.9$  Hz,  $J = 10.5$  Hz).

**$^{13}\text{C}$  NMR** (151 MHz, Chloroform- $d$ )  $\delta$  158.7 (d,  $J = 2.7$  Hz), 155.8 (d,  $J = 265.1$  Hz), 147.3, 129.8 (d,  $J = 7.2$  Hz), 129.3, 125.7 (d,  $J = 2.8$  Hz), 118.2, 113.9, 113.2, 106.4 (d,  $J = 6.8$  Hz), 55.3, 45.6 (d,  $J = 33.4$  Hz).

**IR** (neat,  $\text{cm}^{-1}$ ):  $\tilde{\nu}$ : 3416, 2929, 1692, 1601, 1504, 1434, 1305, 1248, 1154, 1105, 1033, 854, 742.

**ESI-HRMS**: mass spectrometry:  $m/z$  calcd for  $\text{C}_{16}\text{H}_{15}\text{ONF}$   $[\text{M}+\text{H}]^+$  256.11322, measured 256.11249.

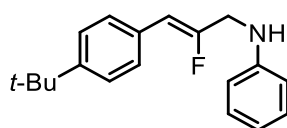

**(Z)-N-(3-(4-(tert-butyl)phenyl)-2-fluoroallyl)aniline**

**c4:** The crude mixture was purified by SiO<sub>2</sub> gel column chromatography with pentane/EA (from 60:1). 43 mg product was obtained by 76% isolated yield as yellow oil.

**<sup>1</sup>H NMR** (600 MHz, Chloroform-*d*) δ 7.34 (d, *J* = 8.4 Hz, 2H), 7.26 (d, *J* = 8.4 Hz, 2H), 7.13 – 7.08 (m, 2H), 6.67 (t, *J* = 7.3 Hz, 1H), 6.60 (d, *J* = 7.4 Hz, 2H), 5.65 (d, *J* = 39.7 Hz, 1H), 3.95 – 3.88 (m, 3H), 1.23 (s, 9H).

**<sup>19</sup>F NMR** (565 MHz, Chloroform-*d*) δ -110.50 (dt, *J* = 39.5 Hz, *J* = 10.0 Hz).

**<sup>13</sup>C NMR** (151 MHz, Chloroform-*d*) δ 156.7 (d, *J* = 266.7 Hz), 150.3 (d, *J* = 2.1 Hz), 147.3, 130.2 (d, *J* = 2.4 Hz), 129.3, 128.3 (d, *J* = 7.1 Hz), 125.4, 118.3, 113.2, 106.7 (d, *J* = 6.7 Hz), 45.6 (d, *J* = 33.7 Hz), 34.6, 31.3.

**IR** (neat, cm<sup>-1</sup>):  $\tilde{\nu}$ : 3420, 2960, 1694, 1602, 1506, 1437, 1364, 1264, 1105, 986, 863, 747.

**ESI-HRMS:** mass spectrometry: *m/z* calcd for C<sub>19</sub>H<sub>23</sub>NF [M+H]<sup>+</sup> 284.18090, measured 284.18045.

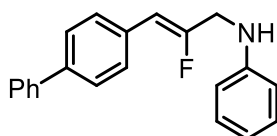

**(Z)-N-(3-([1,1'-biphenyl]-4-yl)-2-fluoroallyl)aniline**

**c5:** The crude mixture was purified by SiO<sub>2</sub> gel column chromatography with pentane/EA (from 60:1). 52 mg product was obtained by 86% isolated yield as brown solid.

**<sup>1</sup>H NMR** (600 MHz, Chloroform-*d*) δ 7.53 – 7.45 (m, 6H), 7.35 (t, *J* = 7.6 Hz, 2H), 7.26 (t, *J* = 7.4 Hz, 1H), 7.13 (t, *J* = 7.9 Hz, 2H), 6.69 (t, *J* = 7.3 Hz, 1H), 6.63 (d, *J* = 8.0 Hz, 2H), 5.73 (d, *J* = 39.4 Hz, 1H), 4.0 (broad s, 1H), 3.95 (d, *J* = 9.7 Hz, 2H).

**<sup>19</sup>F NMR** (565 MHz, Chloroform-*d*) δ -109.04 (dt, *J* = 39.6 Hz, *J* = 9.6 Hz).

**<sup>13</sup>C NMR** (151 MHz, Chloroform-*d*) δ 157.4 (d, *J* = 268.1 Hz), 147.2, 140.7, 139.9 (d, *J* = 2.5 Hz), 132.1 (d, *J* = 2.4 Hz), 129.4, 129.0 (d, *J* = 7.2 Hz), 128.8, 127.3, 127.1, 127.0, 118.4, 113.2, 106.5 (d, *J* = 6.6 Hz), 45.6 (d, *J* = 33.7 Hz).

**IR** (neat, cm<sup>-1</sup>):  $\tilde{\nu}$ : 3399, 2920, 1596, 1503, 1311, 1157, 1067, 982, 908, 867, 751, 688.

**ESI-HRMS:** mass spectrometry: *m/z* calcd for C<sub>21</sub>H<sub>18</sub>NFNa [M+Na]<sup>+</sup> 326.13155, measured 326.13123.

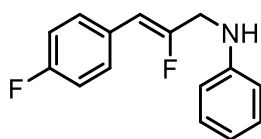

**(Z)-N-(2-fluoro-3-(4-fluorophenyl)allyl)aniline**

**c6:** The crude mixture was purified by SiO<sub>2</sub> gel column chromatography with pentane/EA (from 60:1). 45 mg product was obtained by 92% isolated yield as yellow oil.

**<sup>1</sup>H NMR** (600 MHz, Chloroform-*d*) δ 7.36 (dd, *J* = 8.4, 5.5 Hz, 2H), 7.12 (t, *J* = 7.6 Hz, 2H), 6.91 (t, *J* = 8.5 Hz, 2H), 6.68 (t, *J* = 7.3 Hz, 1H), 6.60 (d, *J* = 7.9 Hz, 2H), 5.64 (d, *J* = 39.1 Hz, 1H), 3.94 (broad s, 1H), 3.91 (d, *J* = 9.7 Hz, 2H).

**<sup>19</sup>F NMR** (565 MHz, Chloroform-*d*) δ -110.74 (dt, *J* = 39.1, 9.8 Hz, 1F), -114.18 (m, 1F).

**<sup>13</sup>C NMR** (151 MHz, Chloroform-*d*) δ 161.8 (dd, *J* = 247.1, 3.2 Hz), 156.9 (dd, *J* = 267.5, 2.3 Hz), 147.1, 130.2 (t, *J* = 7.6 Hz), 129.4, 129.1 (t, *J* = 3.0 Hz), 118.4, 115.4 (d, *J* = 21.4 Hz), 113.2, 105.7 (d, *J* = 6.7 Hz), 45.4 (d, *J* = 33.8 Hz).

**IR** (neat, cm<sup>-1</sup>):  $\tilde{\nu}$ : 3418, 2920, 1695, 1601, 1504, 1436, 1378, 1228, 1157, 1106, 985, 749.

**APCI-HRMS:** mass spectrometry:  $m/z$  calcd for  $C_{15}H_{14}NF_2$   $[M+H]^+$  246.10888, measured 246.10889.

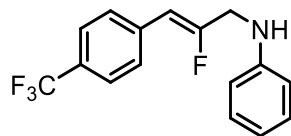

**(Z)-N-(2-fluoro-3-(4-(trifluoromethyl)phenyl)allyl)aniline**

**c7:** The crude mixture was purified by  $SiO_2$  gel column chromatography with pentane/EA (from 40:1). 45 mg product was obtained by 76% isolated yield as brown oil.

**$^1H$  NMR** (600 MHz, Chloroform-*d*)  $\delta$  7.47 (s, 4H), 7.15 – 7.11 (m, 2H), 6.70 (t,  $J = 7.4$  Hz, 1H), 6.61 (d,  $J = 7.4$  Hz, 2H), 5.73 (d,  $J = 38.7$  Hz, 1H), 3.97 (broad s, 1H), 3.95 (d,  $J = 8.5$  Hz, 2H).

**$^{19}F$  NMR** (564 MHz, Chloroform-*d*)  $\delta$  -62.60 (s, 3F), -106.34 (dt,  $J = 38.8, 8.5$  Hz, 1F).

**$^{13}C$  NMR** (151 MHz, Chloroform-*d*)  $\delta$  159.1 (d,  $J = 271.2$  Hz), 147.0, 136.5, 129.4, 128.95 (qd,  $J = 32.6$  Hz,  $J = 2.5$  Hz), 128.7 (d,  $J = 7.4$  Hz), 125.4 (q,  $J = 3.8$  Hz), 124.1 (q,  $J = 271.8$  Hz), 118.5, 113.1, 105.5 (d,  $J = 6.0$  Hz), 45.3 (d,  $J = 34.1$  Hz).

**IR** (neat,  $cm^{-1}$ ):  $\tilde{\nu}$ : 3418, 2922, 1694, 1603, 1506, 1415, 1322, 1263, 1163, 1066, 1017, 865, 750.

**EI-HRMS:** mass spectrometry:  $m/z$  calcd for  $C_{16}H_{13}NF_4$   $[M]^+$  295.09786, measured 295.09788.

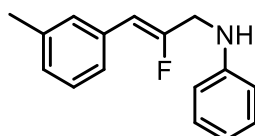

**(Z)-N-(2-fluoro-3-(*m*-tolyl)allyl)aniline**

**c8:** The crude mixture was purified by  $SiO_2$  gel column chromatography with pentane/EA (from 60:1). 40 mg product was obtained by 83% isolated yield as brown oil.

**$^1H$  NMR** (600 MHz, Chloroform-*d*)  $\delta$  7.21 (s, 2H), 7.15 – 7.09 (m, 3H), 6.96 (d,  $J = 7.5$  Hz, 1H), 6.68 (t,  $J = 7.3$  Hz, 1H), 6.60 (d,  $J = 7.5$  Hz, 2H), 5.64 (d,  $J = 39.6$  Hz, 1H), 3.94 (broad s, 1H), 3.91 (d,  $J = 9.9$  Hz, 2H), 2.25 (s, 3H).

**$^{19}F$  NMR** (565 MHz, Chloroform-*d*)  $\delta$  -109.63 (dt,  $J = 39.9$  Hz,  $J = 9.9$  Hz).

**$^{13}C$  NMR** (151 MHz, Chloroform-*d*)  $\delta$  157.0 (d,  $J = 267.4$  Hz), 147.2, 138.0, 132.9 (d,  $J = 2.8$  Hz), 129.3, 129.3 (d,  $J = 6.7$  Hz), 128.4, 128.0 (d,  $J = 2.3$  Hz), 125.7 (d,  $J = 7.3$  Hz), 118.3, 113.2, 106.9 (d,  $J = 6.3$  Hz), 45.5 (d,  $J = 33.6$  Hz), 21.4.

**IR** (neat,  $cm^{-1}$ ):  $\tilde{\nu}$ : 3446, 2922, 1693, 1603, 1504, 1436, 1277, 1243, 1102, 984, 847, 740, 688.

**APCI-HRMS:** mass spectrometry:  $m/z$  calcd for  $C_{16}H_{17}NF$   $[M+H]^+$  242.13395, measured 242.13414.

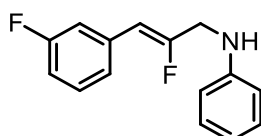

**(Z)-N-(2-fluoro-3-(3-fluorophenyl)allyl)aniline**

**c9:** The crude mixture was purified by  $SiO_2$  gel column chromatography with pentane/EA (from 60:1). 46 mg product was obtained by 94% isolated yield as yellow oil.

**<sup>1</sup>H NMR** (600 MHz, Chloroform-*d*) δ 7.20 – 7.08 (m, 5H), 6.84 (tdd, *J* = 8.5 Hz, *J* = 2.7 Hz, *J* = 1.0 Hz, 1H), 6.69 (tt, *J* = 7.3 Hz, *J* = 1.0 Hz, 1H), 6.60 (dm, *J* = 7.4 Hz, 2H), 5.67 (d, *J* = 38.6 Hz, 1H), 3.95 (broad s, 1H) 3.93 (d, *J* = 9.3 Hz, 2H).

**<sup>19</sup>F NMR** (565 MHz, Chloroform-*d*) δ -107.49 (dt, *J* = 38.8 Hz, *J* = 8.9 Hz, 1F), -113.29 (m, 1F).

**<sup>13</sup>C NMR** (151 MHz, Chloroform-*d*) δ 162.8 (d, *J* = 244.6 Hz), 158.2 (d, *J* = 269.7 Hz), 147.0, 135.0 (dd, *J* = 8.5, 2.4 Hz), 129.8 (d, *J* = 8.4 Hz), 129.4, 124.3 (dd, *J* = 6.4, 2.8 Hz), 118.4, 115.2 (dd, *J* = 22.7, 8.6 Hz), 114.1 (dd, *J* = 23.3 Hz, *J* = 2.2 Hz), 113.1, 105.8 (dd, *J* = 6.2, 2.7 Hz), 45.4 (d, *J* = 33.9 Hz).

**IR** (neat, cm<sup>-1</sup>):  $\tilde{\nu}$ : 3418, 2921, 2326, 1692, 1602, 1505, 1438, 1310, 1246, 1152, 963, 875, 750.

**APCI-HRMS**: mass spectrometry: *m/z* calcd for C<sub>15</sub>H<sub>14</sub>NF<sub>2</sub> [M+H]<sup>+</sup> 246.10888, measured 246.10929.

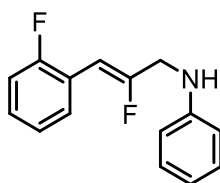

**(Z)-N-(2-fluoro-3-(2-fluorophenyl)allyl)aniline**

**c10**: The crude mixture was purified by SiO<sub>2</sub> gel column chromatography with pentane/EA (from 60:1). 30 mg product was obtained by 61% isolated yield as yellow oil.

**<sup>1</sup>H NMR** (600 MHz, Chloroform-*d*) δ 7.70 (td, *J* = 7.7 Hz, *J* = 1.8 Hz, 1H), 7.16 – 7.09 (m, 3H), 7.03 (t, *J* = 7.7 Hz, 1H), 6.94 (m, 1H), 6.69 (t, *J* = 7.3 Hz, 1H), 6.62 (d, *J* = 7.5 Hz, 2H), 5.96 (d, *J* = 39.1 Hz, 1H), 3.96 (d, *J* = 10.4 Hz, 2H), 3.95 (broad s, 1H).

**<sup>19</sup>F NMR** (565 MHz, Chloroform-*d*) δ -108.03 (dtd, *J* = 38.6 Hz, *J* = 10.7 Hz, *J* = 4.6 Hz, 1F), -116.85 (m, 1F).

**<sup>13</sup>C NMR** (151 MHz, Chloroform-*d*) δ 159.4 (d, *J* = 249.3 Hz), 158.5 (dd, *J* = 269.6, 2.2 Hz), 147.1, 130.1 (dd, *J* = 12.2, 2.9 Hz), 129.4, 128.7 (dd, *J* = 8.5 Hz, *J* = 1.5 Hz), 124.1 (d, *J* = 3.6 Hz), 120.8 (dd, *J* = 12.1, 2.6 Hz), 118.4, 115.2 (d, *J* = 22.2 Hz), 113.2, 98.6 (t, *J* = 6.6 Hz), 45.6 (d, *J* = 32.8 Hz).

**IR** (neat, cm<sup>-1</sup>):  $\tilde{\nu}$ : 3418, 2921, 1695, 1602, 1503, 1452, 1313, 1253, 1152, 1112, 985, 824, 750.

**ESI-HRMS**: mass spectrometry: *m/z* calcd for C<sub>15</sub>H<sub>14</sub>NF<sub>2</sub> [M+H]<sup>+</sup> 246.10888, measured 246.10830.

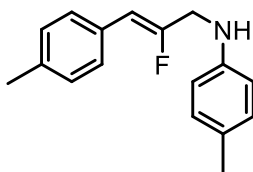

**(Z)-N-(2-fluoro-3-(*p*-tolyl)allyl)-4-methylaniline**

**c11**: The crude mixture was purified by SiO<sub>2</sub> gel column chromatography with pentane/EA (from 60:1). 50 mg product was obtained by 98% isolated yield as brown oil.

**<sup>1</sup>H NMR** (600 MHz, Chloroform-*d*) δ 7.28 (d, *J* = 8.0 Hz, 2H), 7.03 (d, *J* = 7.9 Hz, 2H), 6.92 (d, *J* = 8.1 Hz, 2H), 6.52 (d, *J* = 8.4 Hz, 2H), 5.62 (d, *J* = 39.7 Hz, 1H), 3.87 (d, *J* = 10.3 Hz, 2H), 3.84 – 3.69 (broad s, 1H), 2.24 (s, 3H), 2.16 (s, 3H).

**<sup>19</sup>F NMR** (565 MHz, Chloroform-*d*) δ -110.40 (dt, *J* = 39.8 Hz, *J* = 10.3 Hz).

**<sup>13</sup>C NMR** (151 MHz, Chloroform-*d*) δ 156.8 (d, *J* = 266.8 Hz), 145.0, 137.0 (d, *J* = 2.3 Hz), 130.2 (d, *J* = 2.4 Hz), 129.8, 129.2, 128.5 (d, *J* = 7.2 Hz), 127.5, 113.4, 106.7 (d, *J* = 6.7 Hz), 45.9 (d, *J* = 33.3 Hz), 21.3, 20.4.

**IR** (neat,  $\text{cm}^{-1}$ ):  $\tilde{\nu}$ : 3400, 2913, 1691, 1613, 1515, 1449, 1340, 1245, 1156, 1091, 987, 878, 808.

**APCI-HRMS**: mass spectrometry:  $m/z$  calcd for  $\text{C}_{17}\text{H}_{19}\text{NF}$   $[\text{M}+\text{H}]^+$  256.14960, measured 256.14968.

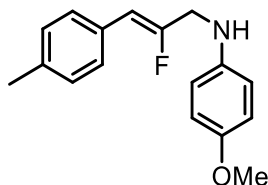

**(Z)-N-(2-fluoro-3-(p-tolyl)allyl)-4-methoxyaniline**

**c12**: The crude mixture was purified by  $\text{SiO}_2$  gel column chromatography with pentane/EA (from 40:1). 49 mg product was obtained by 90% isolated yield as black solid.

**$^1\text{H}$  NMR** (600 MHz, Chloroform-*d*)  $\delta$  7.29 (d,  $J = 8.1$  Hz, 2H), 7.04 (d,  $J = 7.9$  Hz, 2H), 6.74 – 6.68 (2<sup>nd</sup> order m, 2H), 6.60 – 6.53 (2<sup>nd</sup> order m, 2H), 5.62 (d,  $J = 39.8$  Hz, 1H), 3.85 (d,  $J = 10.8$  Hz, 2H), 3.71 (broad s, 1H), 3.66 (s, 3H), 2.24 (s, 3H).

**$^{19}\text{F}$  NMR** (565 MHz, Chloroform-*d*)  $\delta$  -110.40 (dt,  $J = 39.6$  Hz,  $J = 10.7$  Hz).

**$^{13}\text{C}$  NMR** (151 MHz, Chloroform-*d*)  $\delta$  156.9 (d,  $J = 266.4$  Hz), 152.7, 141.4, 137.0 (d,  $J = 2.6$  Hz), 130.2 (d,  $J = 2.4$  Hz), 129.2, 128.5 (d,  $J = 7.0$  Hz), 114.9, 114.7, 106.8 (d,  $J = 6.8$  Hz), 55.8, 46.6 (d,  $J = 33.0$  Hz), 21.2.

**IR** (neat,  $\text{cm}^{-1}$ ):  $\tilde{\nu}$ : 3398, 2919, 1691, 1613, 1507, 1462, 1343, 1233, 1154, 1035, 873, 816, 761.

**EI-HRMS**: mass spectrometry:  $m/z$  calcd for  $\text{C}_{17}\text{H}_{18}\text{ONF}$   $[\text{M}]^+$  271.13669, measured 271.13661.

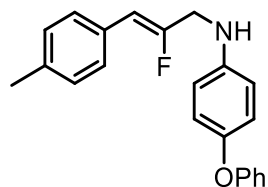

**(Z)-N-(2-fluoro-3-(p-tolyl)allyl)-4-phenoxyaniline**

**c13**: The crude mixture was purified by  $\text{SiO}_2$  gel column chromatography with pentane/EA (from 40:1). 58 mg product was obtained by 87% isolated yield as yellow oil.

**$^1\text{H}$  NMR** (600 MHz, Chloroform-*d*)  $\delta$  7.43 (d,  $J = 7.8$  Hz, 2H), 7.32 (t,  $J = 7.7$  Hz, 2H), 7.18 (d,  $J = 7.8$  Hz, 2H), 7.05 (t,  $J = 7.3$  Hz, 1H), 6.97 (t,  $J = 8.8$  Hz, 4H), 6.72 (d,  $J = 8.6$  Hz, 2H), 5.77 (d,  $J = 39.6$  Hz, 1H), 4.02 (d,  $J = 11.0$  Hz, 2H), 4.00 (broad s, 1H), 2.38 (s, 3H).

**$^{19}\text{F}$  NMR** (565 MHz, Chloroform-*d*)  $\delta$  -110.54 (dt,  $J = 39.4$  Hz,  $J = 10.8$  Hz).

**$^{13}\text{C}$  NMR** (151 MHz, Chloroform-*d*)  $\delta$  158.9, 156.5 (d,  $J = 266.5$  Hz), 148.4, 143.8, 137.1 (d,  $J = 2.3$  Hz), 130.1 (d,  $J = 2.4$  Hz), 129.5, 129.2, 128.5 (d,  $J = 7.0$  Hz), 122.1, 121.2, 117.3, 114.3, 107.0 (d,  $J = 6.8$  Hz), 46.1 (d,  $J = 33.1$  Hz), 21.3.

**IR** (neat,  $\text{cm}^{-1}$ ):  $\tilde{\nu}$ : 3424, 2915, 1691, 1589, 1508, 1407, 1333, 1229, 1151, 1074, 989, 869, 747.

**ESI-HRMS**: mass spectrometry:  $m/z$  calcd for  $\text{C}_{22}\text{H}_{20}\text{ONFK}$   $[\text{M}+\text{K}]^+$  372.11605, measured 372.11599.



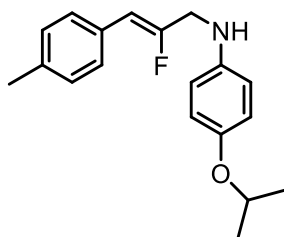

**(Z)-N-(2-fluoro-3-(p-tolyl)allyl)-4-isopropoxyaniline**

**c14:** The crude mixture was purified by SiO<sub>2</sub> gel column chromatography with pentane/EA (from 40:1). 58 mg product was obtained by 97% isolated yield as brown oil.

**<sup>1</sup>H NMR** (600 MHz, Chloroform-*d*) δ 7.29 (d, *J* = 8.1 Hz, 2H), 7.04 (d, *J* = 7.9 Hz, 2H), 6.70 (d, *J* = 8.9 Hz, 2H), 6.54 (d, *J* = 8.8 Hz, 2H), 5.63 (d, *J* = 39.7 Hz, 1H), 4.28 (sept, *J* = 6.1 Hz, 1H), 3.85 (d, *J* = 10.6 Hz, 2H), 3.69 (broad s, 1H), 2.24 (s, 3H), 1.20 (d, *J* = 6.1 Hz, 6H).

**<sup>19</sup>F NMR** (565 MHz, Chloroform-*d*) δ -110.33 (dt, *J* = 39.6 Hz, *J* = 10.7 Hz).

**<sup>13</sup>C NMR** (151 MHz, Chloroform-*d*) δ 156.9 (d, *J* = 266.6 Hz), 150.7, 141.6, 137.0 (d, *J* = 2.3 Hz), 130.2 (d, *J* = 2.5 Hz), 129.2, 128.5 (d, *J* = 7.0 Hz), 117.9, 114.5, 106.8 (d, *J* = 6.8 Hz), 71.1, 46.5 (d, *J* = 33.0 Hz), 22.2, 21.2.

**IR** (neat, cm<sup>-1</sup>):  $\tilde{\nu}$ : 3418, 2978, 1693, 1507, 1454, 1374, 1337, 1227, 1116, 946, 860, 814.

**EI-HRMS:** mass spectrometry: *m/z* calcd for C<sub>19</sub>H<sub>22</sub>ONF [M]<sup>+</sup> 299.16799, measured 299.16793.

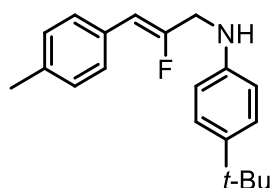

**(Z)-4-(tert-butyl)-N-(2-fluoro-3-(p-tolyl)allyl)aniline**

**c15:** The crude mixture was purified by SiO<sub>2</sub> gel column chromatography with pentane/EA (from 60:1). 58 mg product was obtained by 98% isolated yield as yellow oil.

**<sup>1</sup>H NMR** (600 MHz, Chloroform-*d*) δ 7.29 (d, *J* = 8.0 Hz, 2H), 7.14 (d, *J* = 8.6 Hz, 2H), 7.04 (d, *J* = 7.9 Hz, 2H), 6.56 (d, *J* = 8.6 Hz, 2H), 5.65 (d, *J* = 39.7 Hz, 1H), 3.88 (d, *J* = 10.3 Hz, 2H), 3.83 (broad s, 1H), 2.24 (s, 3H), 1.20 (s, 9H).

**<sup>19</sup>F NMR** (565 MHz, Chloroform-*d*) δ -110.30 (dt, *J* = 39.9 Hz, *J* = 10.1 Hz).

**<sup>13</sup>C NMR** (151 MHz, Chloroform-*d*) δ 156.9 (d, *J* = 266.4 Hz), 144.9, 141.0, 137.0 (d, *J* = 2.3 Hz), 130.2 (d, *J* = 2.5 Hz), 129.2, 128.5 (d, *J* = 6.9 Hz), 126.1, 112.9, 106.6 (d, *J* = 6.7 Hz), 45.8 (d, *J* = 33.4 Hz), 33.9, 31.6, 21.3.

**IR** (neat, cm<sup>-1</sup>):  $\tilde{\nu}$ : 3383, 2956, 1695, 1614, 1516, 1455, 1360, 1300, 1191, 1158, 1079, 992, 816.

**ESI-HRMS:** mass spectrometry: *m/z* calcd for C<sub>20</sub>H<sub>24</sub>NFNa [M+Na]<sup>+</sup> 320.17850, measured 320.17773.

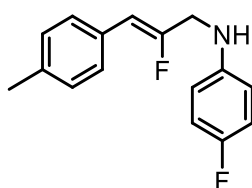

**(Z)-4-fluoro-N-(2-fluoro-3-(p-tolyl)allyl)aniline**

**c16:** The crude mixture was purified by SiO<sub>2</sub> gel column chromatography with pentane/EA (from

60:1). 43 mg product was obtained by 83% isolated yield as brown solid.

**<sup>1</sup>H NMR** (600 MHz, Chloroform-*d*) δ 7.28 (d, *J* = 8.0 Hz, 2H), 7.05 (d, *J* = 7.9 Hz, 2H), 6.85 – 6.79 (m, 2H), 6.56 – 6.50 (m, 2H), 5.62 (d, *J* = 39.6 Hz, 1H), 3.86 (d, *J* = 10.7 Hz, 2H), 3.82 (broad s, 1H), 2.25 (s, 3H).

**<sup>19</sup>F NMR** (564 MHz, Chloroform-*d*) δ -110.72 (dt, *J* = 39.7, 10.7 Hz, 1F), -127.06 (m, 1F).

**<sup>13</sup>C NMR** (151 MHz, Chloroform-*d*) δ 156.4 (d, *J* = 266.5 Hz), 156.3 (d, *J* = 236.0 Hz), 143.5 (d, *J* = 1.9 Hz), 137.2 (d, *J* = 2.3 Hz), 130.0 (d, *J* = 2.5 Hz), 129.2, 128.5 (d, *J* = 7.2 Hz), 115.8 (d, *J* = 22.3 Hz), 114.2 (d, *J* = 7.4 Hz), 107.0 (d, *J* = 6.7 Hz), 46.2 (d, *J* = 32.9 Hz), 21.2.

**IR** (neat, cm<sup>-1</sup>):  $\tilde{\nu}$ : 3391, 2920, 1691, 1610, 1510, 1343, 1221, 1155, 1111, 989, 874, 785.

**EI-HRMS**: mass spectrometry: *m/z* calcd for C<sub>16</sub>H<sub>15</sub>NF<sub>2</sub> [M]<sup>+</sup> 259.11671, measured 59.11663.

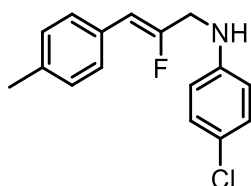

**(Z)-4-chloro-N-(2-fluoro-3-(*p*-tolyl)allyl)aniline**

**c17**: The crude mixture was purified by SiO<sub>2</sub> gel column chromatography with pentane/EA (from 60:1). 27 mg product was obtained by 49% isolated yield as brown solid.

**<sup>1</sup>H NMR** (600 MHz, Chloroform-*d*) δ 7.28 (d, *J* = 7.9 Hz, 2H), 7.11 – 7.02 (m, 4H), 6.52 (d, *J* = 8.8 Hz, 2H), 5.61 (d, *J* = 39.5 Hz, 1H), 3.98 (broad s, 1H), 3.88 (d, *J* = 10.5 Hz, 2H), 2.25 (s, 3H).

**<sup>19</sup>F NMR** (565 MHz, Chloroform-*d*) δ -110.84 (dt, *J* = 39.8 Hz, *J* = 10.4 Hz).

**<sup>13</sup>C NMR** (151 MHz, Chloroform-*d*) δ 156.0 (d, *J* = 266.5 Hz), 145.8, 137.2 (d, *J* = 2.3 Hz), 129.9 (d, *J* = 2.5 Hz), 129.2, 129.1, 128.5 (d, *J* = 7.0 Hz), 122.9, 114.3, 107.1 (d, *J* = 6.8 Hz), 45.6 (d, *J* = 33.4 Hz), 21.2.

**IR** (neat, cm<sup>-1</sup>):  $\tilde{\nu}$ : 3390, 2917, 1691, 1599, 1495, 1340, 1239, 1156, 1083, 993, 874, 814, 711.

**EI-HRMS**: mass spectrometry: *m/z* calcd for C<sub>16</sub>H<sub>15</sub>NCIF [M]<sup>+</sup> 275.08716, measured 275.08730.

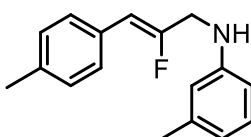

**(Z)-N-(2-fluoro-3-(*p*-tolyl)allyl)-3-methylaniline**

**c18**: The crude mixture was purified by SiO<sub>2</sub> gel column chromatography with pentane/EA (from 60:1). 48 mg product was obtained by 94% isolated yield as brown solid.

**<sup>1</sup>H NMR** (600 MHz, Chloroform-*d*) δ 7.29 (d, *J* = 7.9 Hz, 2H), 7.04 (d, *J* = 7.9 Hz, 2H), 7.00 (t, *J* = 8.0 Hz, 1H), 6.50 (d, *J* = 7.5 Hz, 1H), 6.41 (d, *J* = 6.5 Hz, 2H), 5.63 (d, *J* = 39.8 Hz, 1H), 3.88 (d, *J* = 10.1 Hz, 2H), 3.86 (broad s, 1H), 2.24 (s, 3H), 2.20 (s, 3H).

**<sup>19</sup>F NMR** (565 MHz, Chloroform-*d*) δ -110.39 (dt, *J* = 39.5 Hz, *J* = 10.1 Hz).

**<sup>13</sup>C NMR** (151 MHz, Chloroform-*d*) δ 156.8 (d, *J* = 266.8 Hz), 147.3, 139.2, 137.0 (d, *J* = 2.3 Hz), 130.2 (d, *J* = 2.5 Hz), 129.22, 129.18, 128.5 (d, *J* = 7.0 Hz), 119.2, 114.0, 110.3, 106.7 (d, *J* = 6.7 Hz), 45.6 (d, *J* = 33.5 Hz), 21.7, 21.3.

**IR** (neat, cm<sup>-1</sup>):  $\tilde{\nu}$ : 3415, 2919, 1694, 1603, 1510, 1443, 1325, 1269, 1178, 1104, 988, 857, 769.

**ESI-HRMS**: mass spectrometry: *m/z* calcd for C<sub>17</sub>H<sub>18</sub>NFNa [M+Na]<sup>+</sup> 278.13155, measured 278.13071.

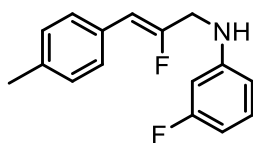

**(Z)-3-fluoro-N-(2-fluoro-3-(p-tolyl)allyl)aniline**

**c19:** The crude mixture was purified by SiO<sub>2</sub> gel column chromatography with pentane/EA (from 60:1). 48 mg product was obtained by 93% isolated yield as yellow oil.

**<sup>1</sup>H NMR** (600 MHz, Chloroform-*d*) δ 7.29 (d, *J* = 7.9 Hz, 2H), 7.07 – 6.99 (m, 3H), 6.37 – 6.32 (m, 2H), 6.28 (d, *J* = 11.4 Hz, 1H), 5.62 (d, *J* = 39.5 Hz, 1H), 4.04 (very broad t, *J* = 5.5 Hz, 1H), 3.88 (dd, *J* = 10.7, 5.3 Hz, 2H), 2.25 (s, 3H).

**<sup>19</sup>F NMR** (565 MHz, Chloroform-*d*) δ -110.84 (dt, *J* = 39.4 Hz, *J* = 10.8 Hz, 1F), -112.57 (m, 1F).

**<sup>13</sup>C NMR** (151 MHz, Chloroform-*d*) δ 164.1 (d, *J* = 243.3 Hz), 155.9 (d, *J* = 266.5 Hz), 149.0 (d, *J* = 10.5 Hz), 137.2 (d, *J* = 2.4 Hz), 130.4 (d, *J* = 10.2 Hz), 129.9 (d, *J* = 2.7 Hz), 129.2, 128.5 (d, *J* = 7.1 Hz), 109.0 (d, *J* = 2.4 Hz), 107.1 (d, *J* = 6.8 Hz), 104.7 (d, *J* = 21.7 Hz), 100.0 (d, *J* = 25.5 Hz), 45.4 (d, *J* = 33.4 Hz), 21.2.

**IR** (neat, cm<sup>-1</sup>):  $\tilde{\nu}$ : 3429, 2926, 1694, 1592, 1506, 1438, 1336, 1285, 1144, 1102, 967, 863, 757.

**EI-HRMS:** mass spectrometry: *m/z* calcd for C<sub>16</sub>H<sub>15</sub>NF<sub>2</sub> [M]<sup>+</sup> 259.11671, measured 259.11645.

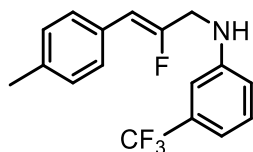

**(Z)-N-(2-fluoro-3-(p-tolyl)allyl)-3-(trifluoromethyl)aniline**

**c20:** The crude mixture was purified by SiO<sub>2</sub> gel column chromatography with pentane/EA (from 40:1). 55 mg product was obtained by 89% isolated yield as yellow oil.

**<sup>1</sup>H NMR** (600 MHz, Chloroform-*d*) δ 7.29 (d, *J* = 7.9 Hz, 2H), 7.19 (t, *J* = 8.0 Hz, 1H), 7.05 (d, *J* = 7.8 Hz, 2H), 6.90 (d, *J* = 7.7 Hz, 1H), 6.79 (s, 1H), 6.72 (d, *J* = 8.3 Hz, 1H), 5.63 (d, *J* = 39.3 Hz, 1H), 4.11 (broad t, *J* = 5.2 Hz, 1H), 3.92 (dd, *J* = 11.1, 6.0 Hz, 2H), 2.24 (s, 3H).

**<sup>19</sup>F NMR** (564 MHz, Chloroform-*d*) δ -62.87 (s, 3F), -111.06 (dt, *J* = 39.4 Hz, *J* = 11.0 Hz, 1F).

**<sup>13</sup>C NMR** (151 MHz, Chloroform-*d*) δ 155.7 (d, *J* = 266.4 Hz), 147.4, 137.3 (d, *J* = 2.5 Hz), 131.7 (q, *J* = 31.8 Hz), 129.8 (d, *J* = 2.8 Hz), 129.8, 129.2, 128.5 (d, *J* = 6.9 Hz), 124.3 (q, *J* = 272.4 Hz), 116.0, 114.7 (q, *J* = 3.8 Hz), 109.5 (q, *J* = 4.1 Hz), 107.4 (d, *J* = 6.7 Hz), 45.3 (d, *J* = 33.2 Hz), 21.2.

**IR** (neat, cm<sup>-1</sup>):  $\tilde{\nu}$ : 3425, 2924, 1694, 1614, 1513, 1444, 1335, 1256, 1160, 1068, 993, 861, 696.

**EI-HRMS:** mass spectrometry: *m/z* calcd for C<sub>17</sub>H<sub>15</sub>NF<sub>4</sub> [M]<sup>+</sup> 309.11351, measured 309.11331.

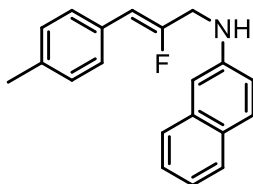

**(Z)-N-(2-fluoro-3-(p-tolyl)allyl)naphthalen-2-amine**

**c21:** The crude mixture was purified by SiO<sub>2</sub> gel column chromatography with pentane/EA (from 40:1). 47 mg product was obtained by 81% isolated yield as black solid.

**<sup>1</sup>H NMR** (600 MHz, Chloroform-*d*) δ 7.59 (d, *J* = 8.2 Hz, 1H), 7.57 (d, *J* = 8.8 Hz, 1H), 7.53 (d, *J* = 8.3 Hz, 1H), 7.32 – 7.24 (m, 3H), 7.14 (d, *J* = 6.6 Hz, 1H), 7.03 (d, *J* = 7.9 Hz, 2H), 6.84 (dd, *J* = 8.8 Hz, *J* = 2.4 Hz, 1H), 6.80 (d, *J* = 2.3 Hz, 1H), 5.67 (d, *J* = 39.6 Hz, 1H), 4.07 (broad s, 1H), 3.99 (d, *J* = 10.3 Hz, 2H), 2.23 (s, 3H).

**<sup>19</sup>F NMR** (565 MHz, Chloroform-*d*) δ -110.43 (dt, *J* = 39.9 Hz, *J* = 10.8 Hz).

**<sup>13</sup>C NMR** (151 MHz, Chloroform-*d*) δ 156.3 (d, *J* = 266.5 Hz), 144.9, 137.1 (d, *J* = 2.3 Hz), 135.0, 130.1 (d, *J* = 2.6 Hz), 129.2, 129.1, 128.5 (d, *J* = 7.1 Hz), 127.9, 127.7, 126.5, 126.1, 122.4, 117.7, 107.0 (d, *J* = 6.7 Hz), 105.4, 45.6 (d, *J* = 33.4 Hz), 21.3.

**IR** (neat, cm<sup>-1</sup>):  $\tilde{\nu}$ : 3400, 2916, 1685, 1625, 1503, 1428, 1306, 1220, 1148, 953, 806, 705.

**ESI-HRMS**: mass spectrometry: *m/z* calcd for C<sub>20</sub>H<sub>19</sub>NF [M+H]<sup>+</sup> 292.14960, measured 292.14928.

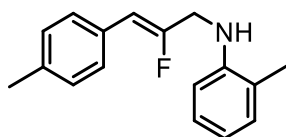

**(Z)-N-(2-fluoro-3-(*p*-tolyl)allyl)-2-methylaniline**

**c22**: The crude mixture was purified by SiO<sub>2</sub> gel column chromatography with pentane/EA (from 60:1). 48 mg product was obtained by 94% isolated yield as yellow oil.

**<sup>1</sup>H NMR** (600 MHz, Chloroform-*d*) δ 7.43 (d, *J* = 8.0 Hz, 2H), 7.18 (d+m, *J* = 8.1 Hz, 3H), 7.14 (d, *J* = 7.3 Hz, 1H), 6.76 (t, *J* = 7.4 Hz, 1H), 6.73 (d, *J* = 8.0 Hz, 1H), 5.78 (d, *J* = 39.6 Hz, 1H), 4.09 (d, *J* = 10.4 Hz, 2H), 3.94 (broad s, 1H), 2.38 (s, 3H), 2.25 (s, 3H).

**<sup>19</sup>F NMR** (565 MHz, Chloroform-*d*) δ -110.49 (dt, *J* = 39.9 Hz, *J* = 10.2 Hz).

**<sup>13</sup>C NMR** (151 MHz, Chloroform-*d*) δ 156.6 (d, *J* = 266.3 Hz), 145.2, 137.1 (d, *J* = 2.4 Hz), 130.3, 130.1 (d, *J* = 2.5 Hz), 129.2, 128.5 (d, *J* = 6.9 Hz), 127.2, 122.3, 117.9, 110.3, 106.8 (d, *J* = 6.7 Hz), 45.6 (d, *J* = 33.3 Hz), 21.3, 17.5.

**IR** (neat, cm<sup>-1</sup>):  $\tilde{\nu}$ : 3440, 2919, 1694, 1604, 1510, 1448, 1312, 1262, 1125, 1051, 983, 860, 746.

**ESI-HRMS**: mass spectrometry: *m/z* calcd for C<sub>17</sub>H<sub>19</sub>NF [M+H]<sup>+</sup> 256.14960, measured 256.14956.

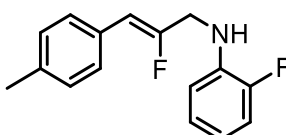

**(Z)-2-fluoro-N-(2-fluoro-3-(*p*-tolyl)allyl)aniline**

**c23**: The crude mixture was purified by SiO<sub>2</sub> gel column chromatography with pentane/EA (from 60:1). 42 mg product was obtained by 81% isolated yield as yellow oil.

**<sup>1</sup>H NMR** (600 MHz, Chloroform-*d*) δ 7.29 (d, *J* = 7.9 Hz, 2H), 7.05 (d, *J* = 7.8 Hz, 2H), 6.95 – 6.88 (m, 2H), 6.69 (t, *J* = 8.3 Hz, 1H), 6.62 – 6.56 (m, 1H), 5.64 (d, *J* = 39.5 Hz, 1H), 4.22 (broad s, 1H), 3.94 (d, *J* = 10.2 Hz, 2H), 2.25 (s, 3H).

**<sup>19</sup>F NMR** (564 MHz, Chloroform-*d*) δ -110.76 (dt, *J* = 39.4 Hz, *J* = 10.3 Hz, 1F), -136.27 (m, 1F).

**<sup>13</sup>C NMR** (151 MHz, Chloroform-*d*) δ 156.1 (d, *J* = 266.4 Hz), 151.7 (d, *J* = 238.6 Hz), 137.2 (d, *J* = 2.4 Hz), 135.7 (d, *J* = 11.5 Hz), 130.0 (d, *J* = 2.8 Hz), 129.2, 128.5 (d, *J* = 7.2 Hz), 124.6 (d, *J* = 3.6 Hz), 117.6 (d, *J* = 7.1 Hz), 114.6 (d, *J* = 18.6 Hz), 112.6 (d, *J* = 3.0 Hz), 106.9 (d, *J* = 6.7 Hz), 45.1 (d, *J* = 34.0 Hz), 21.2.

**IR** (neat, cm<sup>-1</sup>):  $\tilde{\nu}$ : 3434, 2921, 1694, 1620, 1515, 1450, 1336, 1256, 1189, 1112, 1036, 860, 740.

**EI-HRMS:** mass spectrometry:  $m/z$  calcd for  $C_{16}H_{15}NF_2$   $[M]^+$  259.11671, measured 259.11664.

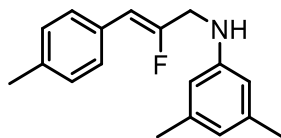

**(Z)-N-(2-fluoro-3-(p-tolyl)allyl)-3,5-dimethylaniline**

**c24:** The crude mixture was purified by  $SiO_2$  gel column chromatography with pentane/EA (from 60:1). 50 mg product was obtained by 93% isolated yield as yellow oil.

**$^1H$  NMR** (600 MHz, Chloroform-*d*)  $\delta$  7.29 (d,  $J = 7.9$  Hz, 2H), 7.04 (d,  $J = 7.9$  Hz, 2H), 6.34 (s, 1H), 6.24 (s, 2H), 5.64 (d,  $J = 39.8$  Hz, 1H), 3.88 (d,  $J = 9.9$  Hz, 2H), 3.81 (broad s, 1H), 2.25 (s, 3H), 2.16 (s, 6H).

**$^{19}F$  NMR** (565 MHz, Chloroform-*d*)  $\delta$  -110.30 (dt,  $J = 40.0$  Hz,  $J = 9.9$  Hz).

**$^{13}C$  NMR** (151 MHz, Chloroform-*d*)  $\delta$  156.9 (d,  $J = 266.8$  Hz), 147.4, 139.0, 137.0 (d,  $J = 2.3$  Hz), 130.2 (d,  $J = 2.7$  Hz), 129.2, 128.5 (d,  $J = 6.9$  Hz), 120.3, 111.1, 106.5 (d,  $J = 6.9$  Hz), 45.6 (d,  $J = 33.8$  Hz), 21.5, 21.2.

**IR** (neat,  $cm^{-1}$ ):  $\tilde{\nu}$ : 3412, 2918, 1694, 1601, 1512, 1474, 1334, 1189, 1034, 858, 820, 689.

**ESI-HRMS:** mass spectrometry:  $m/z$  calcd for  $C_{18}H_{20}NFK$   $[M+K]^+$  308.12114, measured 308.12103.

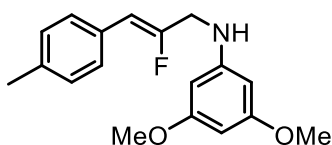

**(Z)-N-(2-fluoro-3-(p-tolyl)allyl)-3,5-dimethoxyaniline**

**c25:** The crude mixture was purified by  $SiO_2$  gel column chromatography with pentane/EA (from 40:1). 45 mg product was obtained by 75% isolated yield as yellow oil.

**$^1H$  NMR** (600 MHz, Chloroform-*d*)  $\delta$  7.41 (d,  $J = 7.8$  Hz, 2H), 7.16 (d,  $J = 7.9$  Hz, 2H), 5.96 (s, 1H), 5.91 (s, 2H), 5.75 (d,  $J = 39.5$  Hz, 1H), 4.08 (broad s, 1H), 3.99 (d,  $J = 10.6$  Hz, 2H), 3.78 (s, 6H), 2.37 (s, 3H).

**$^{19}F$  NMR** (565 MHz, Chloroform-*d*)  $\delta$  -110.53 (dt,  $J = 39.8$  Hz,  $J = 10.4$  Hz).

**$^{13}C$  NMR** (151 MHz, Chloroform-*d*)  $\delta$  161.8, 156.4 (d,  $J = 266.5$  Hz), 149.2, 137.1 (d,  $J = 2.4$  Hz), 130.1 (d,  $J = 2.6$  Hz), 129.2, 128.5 (d,  $J = 7.1$  Hz), 106.9 (d,  $J = 6.8$  Hz), 92.1, 90.5, 55.2, 45.5 (d,  $J = 33.3$  Hz), 21.2.

**IR** (neat,  $cm^{-1}$ ):  $\tilde{\nu}$ : 3410, 2933, 1693, 1598, 1514, 1456, 1338, 1201, 1149, 1065, 861, 808, 681.

**ESI-HRMS:** mass spectrometry:  $m/z$  calcd for  $C_{18}H_{20}O_2NFK$   $[M+Na]^+$  324.13703, measured 324.13641.

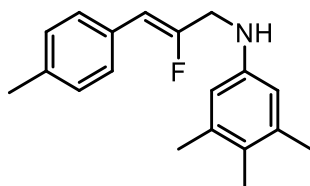

**(Z)-N-(2-fluoro-3-(p-tolyl)allyl)-3,4,5-trimethylaniline**

**c26:** The crude mixture was purified by  $SiO_2$  gel column chromatography with pentane/EA (from 60:1). 56 mg product was obtained by 99% isolated yield as yellow oil.

**<sup>1</sup>H NMR** (600 MHz, Chloroform-*d*) δ 7.29 (d, *J* = 7.8 Hz, 2H), 7.03 (d, *J* = 7.8 Hz, 2H), 6.30 (s, 2H), 5.63 (d, *J* = 39.8 Hz, 1H), 3.85 (d, *J* = 9.8 Hz, 2H), 3.67 (broad s, 1H), 2.24 (s, 3H), 2.13 (s, 6H), 1.98 (s, 3H).

**<sup>19</sup>F NMR** (565 MHz, Chloroform-*d*) δ -110.17 (dt, *J* = 39.9 Hz, *J* = 9.6 Hz).

**<sup>13</sup>C NMR** (151 MHz, Chloroform-*d*) δ 157.2 (d, *J* = 266.5 Hz), 144.8, 137.4, 136.9 (d, *J* = 2.3 Hz), 130.3 (d, *J* = 2.4 Hz), 129.2, 128.5 (d, *J* = 7.0 Hz), 124.9, 112.8, 106.4 (d, *J* = 6.6 Hz), 45.9 (d, *J* = 33.7 Hz), 21.3, 20.9, 14.5.

**IR** (neat, cm<sup>-1</sup>):  $\tilde{\nu}$ : 3408, 2918, 1907, 1694, 1609, 1500, 1443, 1328, 1216, 1136, 991, 837, 702.

**ESI-HRMS**: mass spectrometry: *m/z* calcd for C<sub>19</sub>H<sub>23</sub>NF [M+H]<sup>+</sup> 284.18090, measured 284.18088.

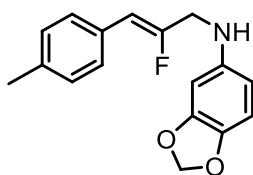

**(Z)-N-(2-fluoro-3-(*p*-tolyl)allyl)benzo[*d*][1,3]dioxol-5-amine**

**c27**: The crude mixture was purified by SiO<sub>2</sub> gel column chromatography with pentane/EA (from 40:1). 47 mg product was obtained by 82% isolated yield as brown oil.

**<sup>1</sup>H NMR** (600 MHz, Chloroform-*d*) δ 7.30 (d, *J* = 7.9 Hz, 2H), 7.05 (d, *J* = 7.9 Hz, 2H), 6.59 (d, *J* = 8.3 Hz, 1H), 6.24 (d, *J* = 2.3 Hz, 1H), 6.05 (dd, *J* = 8.3, 2.3 Hz, 1H), 5.79 (s, 2H), 5.63 (d, *J* = 39.6 Hz, 1H), 3.85 (d, *J* = 10.9 Hz, 2H), 3.75 (broad s, 1H), 2.26 (s, 3H).

**<sup>19</sup>F NMR** (565 MHz, Chloroform-*d*) δ -110.59 (dt, *J* = 39.7 Hz, *J* = 11.0 Hz).

**<sup>13</sup>C NMR** (151 MHz, Chloroform-*d*) δ 156.5 (d, *J* = 266.5 Hz), 148.4, 142.8, 140.3, 137.1 (d, *J* = 2.2 Hz), 130.1 (d, *J* = 2.3 Hz), 129.2, 128.5 (d, *J* = 7.1 Hz), 108.6, 107.0 (d, *J* = 6.8 Hz), 105.1, 100.7, 96.5, 46.6 (d, *J* = 33.1 Hz), 21.2.

**IR** (neat, cm<sup>-1</sup>):  $\tilde{\nu}$ : 3417, 2884, 1693, 1624, 1493, 1292, 1202, 1106, 1037, 934, 809, 730.

**ESI-HRMS**: mass spectrometry: *m/z* calcd for C<sub>17</sub>H<sub>17</sub>NF [M+H]<sup>+</sup> 286.12378, measured 286.12306.

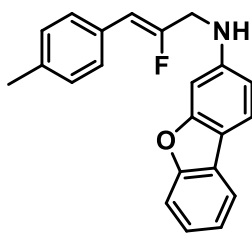

**(Z)-N-(2-fluoro-3-(*p*-tolyl)allyl)dibenzo[*b*,*d*]furan-3-amine**

**c28**: The crude mixture was purified by SiO<sub>2</sub> gel column chromatography with pentane/EA (from 40:1). 63 mg product was obtained by 95% isolated yield as yellow solid.

**<sup>1</sup>H NMR** (600 MHz, Chloroform-*d*) δ 7.69 (d, *J* = 7.5 Hz, 1H), 7.61 (d, *J* = 8.3 Hz, 1H), 7.38 (d, *J* = 8.0 Hz, 1H), 7.29 (d, *J* = 8.0 Hz, 2H), 7.22 (t, *J* = 7.7 Hz, 1H), 7.17 (t, *J* = 7.4 Hz, 1H), 7.03 (d, *J* = 8.0 Hz, 2H), 6.74 (d, *J* = 2.0 Hz, 1H), 6.59 (dd, *J* = 8.4, 2.1 Hz, 1H), 5.66 (d, *J* = 39.5 Hz, 1H), 4.19 (broad s, 1H), 3.96 (d, *J* = 10.7 Hz, 2H), 2.23 (s, 3H).

**<sup>19</sup>F NMR** (565 MHz, Chloroform-*d*) δ -110.67 (dt, *J* = 39.5 Hz, *J* = 10.8 Hz).

<sup>13</sup>C NMR (151 MHz, Chloroform-*d*) δ 158.2, 156.1 (d, *J* = 266.5 Hz), 155.9, 147.7, 137.2 (d, *J* = 2.4 Hz), 130.0 (d, *J* = 2.6 Hz), 129.2, 128.5 (d, *J* = 7.1 Hz), 125.1, 124.9, 122.6, 121.2, 119.3, 115.3, 111.2, 110.2, 107.2 (d, *J* = 6.7 Hz), 95.1, 45.8 (d, *J* = 33.2 Hz), 21.3.

IR (neat, cm<sup>-1</sup>): ν̄: 3417, 2917, 1693, 1636, 1499, 1424, 1339, 1257, 1159, 1011, 872, 747.

ESI-HRMS: mass spectrometry: *m/z* calcd for C<sub>22</sub>H<sub>18</sub>ONF [M]<sup>+</sup> 331.13669, measured 331.13666.

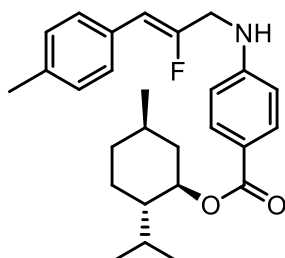

From DL- Menthol

**(1R,2S,5R)-2-isopropyl-5-methylcyclohexyl 4-(((Z)-2-fluoro-3-(*p*-tolyl)allyl)amino)benzoate**

**c29:** The crude mixture was purified by SiO<sub>2</sub> gel column chromatography with pentane/EA (from 20:1). 55 mg product was obtained by 65% isolated yield as yellow solid.

<sup>1</sup>H NMR (600 MHz, Chloroform-*d*) δ 7.81 (d, *J* = 8.3 Hz, 2H), 7.27 (d, *J* = 7.8 Hz, 2H), 7.03 (d, *J* = 7.8 Hz, 2H), 6.55 (d, *J* = 8.4 Hz, 2H), 5.60 (d, *J* = 39.4 Hz, 1H), 4.79 (td, *J* = 10.9 Hz, *J* = 4.3 Hz, 1H), 4.43 (broad s, 1H), 3.93 (d, *J* = 10.1 Hz, 2H), 2.23 (s, 3H), 2.02 (broad d, *J* = 12.0 Hz, 1H), 1.88 (m, 1H), 1.62 (broad d, *J* = 11.4 Hz, 2H), 1.50 – 1.38 (m, 2H), 1.09 – 0.93 (m, 2H), 0.82 (dd+m, *J* = 6.7 Hz, *J* = 3.0 Hz, 7H), 0.70 (d, *J* = 7.0 Hz, 3H).

<sup>19</sup>F NMR (565 MHz, Chloroform-*d*) δ -110.89 (dt, *J* = 39.7 Hz, *J* = 10.2 Hz).

<sup>13</sup>C NMR (151 MHz, Chloroform-*d*) δ 166.2, 155.6 (d, *J* = 266.8 Hz), 150.9, 137.3 (d, *J* = 2.3 Hz), 131.5, 129.9 (d, *J* = 2.5 Hz), 129.2, 128.5 (d, *J* = 7.1 Hz), 120.1, 111.9, 107.2 (d, *J* = 6.7 Hz), 74.1, 47.4, 44.9 (d, *J* = 33.9 Hz), 41.2, 34.4, 31.5, 26.5, 23.8, 22.1, 21.3, 20.8, 16.6.

IR (neat, cm<sup>-1</sup>): ν̄: 3363, 2952, 1672, 1599, 1527, 1338, 1267, 1172, 1112, 965, 903, 838, 727.

ESI-HRMS: mass spectrometry: *m/z* calcd for C<sub>27</sub>H<sub>34</sub>O<sub>2</sub>NFNa [M+Na]<sup>+</sup> 446.24658, measured 446.24504.

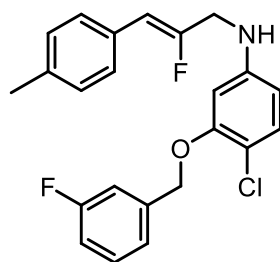

**(Z)-4-chloro-N-(2-fluoro-3-(*p*-tolyl)allyl)-3-((3-fluorobenzyl)oxy)aniline**

**c30:** The crude mixture was purified by SiO<sub>2</sub> gel column chromatography with pentane/EA (from 20:1). 21 mg product was obtained by 26% isolated yield as brown oil.

<sup>1</sup>H NMR (600 MHz, Chloroform-*d*) δ 7.28 (d, *J* = 8.0 Hz, 2H), 7.24 (m, 1H), 7.13 – 7.08 (m, 2H), 7.05 (d, *J* = 7.9 Hz, 2H), 6.91 (td, *J* = 8.6 Hz, *J* = 2.5 Hz, 1H), 6.73 (d, *J* = 8.8 Hz, 1H), 6.66 (d, *J* = 2.9 Hz, 1H), 6.41 (dd, *J* = 8.9, 2.8 Hz, 1H), 5.61 (d, *J* = 39.5 Hz, 1H), 4.94 (s, 2H), 3.84 (d, *J* = 10.9 Hz, 2H), 3.78 (broad s, 1H), 2.25 (s, 3H).

<sup>19</sup>F NMR (565 MHz, Chloroform-*d*) δ -110.75 (dt, *J* = 39.3, 10.9 Hz, 1F), -112.91 (m, 1F).

<sup>13</sup>C NMR (151 MHz, Chloroform-*d*) δ 163.0 (d, *J* = 245.9 Hz), 156.1 (d, *J* = 266.7 Hz), 146.7, 142.7, 139.7 (d, *J* = 7.3 Hz), 137.2 (d, *J* = 2.3 Hz), 130.0 (d, *J* = 8.4 Hz), 130.0 (d, *J* = 2.5 Hz), 129.2, 128.5 (d, *J* = 7.0 Hz), 124.8, 122.7 (d, *J* = 2.9 Hz), 117.0, 115.3, 114.7 (d, *J* = 21.2 Hz), 114.2 (d, *J* = 22.2 Hz), 112.3, 107.1 (d, *J* = 6.8 Hz), 71.5 (d, *J* = 1.9 Hz), 46.0 (d, *J* = 33.1 Hz), 21.2.

IR (neat, cm<sup>-1</sup>):  $\tilde{\nu}$ : 3419, 2922, 2329, 1693, 1592, 1503, 1225, 1140, 1056, 907, 860, 783.

ESI-HRMS: mass spectrometry: *m/z* calcd for C<sub>23</sub>H<sub>20</sub>ONClF<sub>2</sub>Na [M+Na]<sup>+</sup> 422.10937, measured 422.10796.

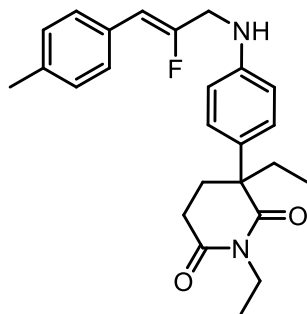

**(Z)-1,3-diethyl-3-(4-((2-fluoro-3-(*p*-tolyl)allyl)amino)phenyl)piperidine-2,6-dione**

**c31:** The crude mixture was purified by SiO<sub>2</sub> gel column chromatography with pentane/EA (from 5:1). 81 mg product was obtained by 99% isolated yield as brown oil.<sup>[4]</sup>

<sup>1</sup>H NMR (600 MHz, Chloroform-*d*) δ 7.29 (d, *J* = 8.2 Hz, 2H), 7.04 (d, *J* = 7.9 Hz, 2H), 6.93 (d, *J* = 8.7 Hz, 2H), 6.55 (d, *J* = 8.7 Hz, 2H), 5.62 (d, *J* = 39.5 Hz, 1H), 4.03 (broad s, 1H), 3.88 (d, *J* = 10.4 Hz, 2H), 3.85 – 3.72 (m, 2H), 2.52 (dm, *J* = 17.8 Hz, 1H), 2.44 – 2.35 (m, 1H), 2.24 (s, 3H), 2.14 (dm, *J* = 14.0 Hz, 1H), 2.02 (td, *J* = 13.7 Hz, *J* = 4.7 Hz, 1H), 1.96 – 1.88 (m, 1H), 1.80 – 1.72 (m, 1H), 1.05 (t, *J* = 7.0 Hz, 3H), 0.75 (t, *J* = 7.4 Hz, 3H).

<sup>19</sup>F NMR (565 MHz, Chloroform-*d*) δ -110.56 (dt, *J* = 39.4, 10.6 Hz).

<sup>13</sup>C NMR (151 MHz, Chloroform-*d*) δ 175.4, 172.2, 156.3 (d, *J* = 266.5 Hz), 146.4, 137.1 (d, *J* = 2.3 Hz), 130.0 (d, *J* = 2.4 Hz), 129.2, 128.7, 128.5 (d, *J* = 6.9 Hz), 127.1, 113.3, 106.9 (d, *J* = 6.6 Hz), 50.5, 45.4 (d, *J* = 33.3 Hz), 35.2, 33.8, 30.0, 25.9, 21.3, 13.3, 9.1.

IR (neat, cm<sup>-1</sup>):  $\tilde{\nu}$ : 3396, 2972, 1910, 1666, 1529, 1455, 1355, 1214, 1122, 1045, 908, 861, 730.

ESI-HRMS: mass spectrometry: *m/z* calcd for C<sub>25</sub>H<sub>29</sub>O<sub>2</sub>N<sub>2</sub>FNa [M+Na]<sup>+</sup> 431.21053, measured 431.20950.

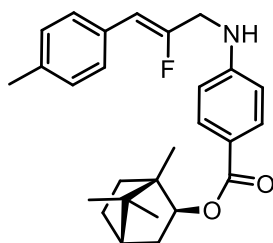

*From DL-Isoborneol*

**(1S,2S,4S)-1,7,7-trimethylbicyclo[2.2.1]heptan-2-yl 4-(((Z)-2-fluoro-3-(*p*-tolyl)allyl)amino)benzoate**

**c32:** The crude mixture was purified by SiO<sub>2</sub> gel column chromatography with pentane/EA (from 10:1). 70 mg product was obtained by 83% isolated yield as yellow solid.



**<sup>1</sup>H NMR** (600 MHz, Chloroform-*d*)  $\delta$  7.83 (d,  $J = 8.3$  Hz, 2H), 7.28 (d,  $J = 7.8$  Hz, 2H), 7.04 (d,  $J = 7.8$  Hz, 2H), 6.57 (d,  $J = 8.3$  Hz, 2H), 5.61 (d,  $J = 39.4$  Hz, 1H), 4.99 (d,  $J = 9.9$  Hz, 1H), 4.42 (broad t,  $J = 5.3$  Hz, 1H), 3.95 (dd,  $J = 10.4, 5.8$  Hz, 2H), 2.41 – 2.32 (m, 1H), 2.24 (s, 3H), 2.08 – 2.00 (m, 1H), 1.75 – 1.66 (m, 1H), 1.63 (t,  $J = 4.6$  Hz, 1H), 1.36 – 1.25 (m, 1H), 1.24 – 1.18 (m, 1H), 1.01 (dd,  $J = 13.8, 3.4$  Hz, 1H), 0.87 (s, 3H), 0.81 (d,  $J = 5.4$  Hz, 6H).

**<sup>19</sup>F NMR** (565 MHz, Chloroform-*d*)  $\delta$  -110.96 (dt,  $J = 39.4, 10.3$  Hz).

**<sup>13</sup>C NMR** (151 MHz, Chloroform-*d*)  $\delta$  166.9, 155.6 (d,  $J = 266.8$  Hz), 150.9, 137.3 (d,  $J = 2.1$  Hz), 131.5, 129.8 (d,  $J = 2.5$  Hz), 129.2, 128.5 (d,  $J = 7.1$  Hz), 120.2, 112.0, 107.3 (d,  $J = 6.6$  Hz), 79.7, 49.1, 47.8, 45.1, 44.9 (d,  $J = 33.7$  Hz), 37.0, 28.1, 27.5, 21.3, 19.8, 19.0, 13.6.

**IR** (neat,  $\text{cm}^{-1}$ ):  $\tilde{\nu}$ : 3360, 2953, 1907, 1671, 1530, 1450, 1341, 1285, 1230, 1170, 1114, 984, 770.

**ESI-HRMS**: mass spectrometry:  $m/z$  calcd for  $\text{C}_{27}\text{H}_{32}\text{O}_2\text{NFNa}$   $[\text{M}+\text{Na}]^+$  444.23093, measured 444.22995.

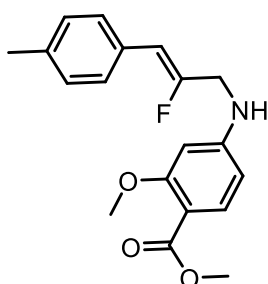

#### methyl (Z)-4-((2-fluoro-3-(*p*-tolyl)allyl)amino)-2-methoxybenzoate

**c33**: The crude mixture was purified by  $\text{SiO}_2$  gel column chromatography with pentane/EA (from 10:1). 58 mg product was obtained by 88% isolated yield as yellow oil.

**<sup>1</sup>H NMR** (600 MHz, Chloroform-*d*)  $\delta$  7.29 (d,  $J = 8.0$  Hz, 2H), 7.08 (d,  $J = 3.0$  Hz, 1H), 7.05 (d,  $J = 7.9$  Hz, 2H), 6.79 (d,  $J = 8.9$  Hz, 1H), 6.74 (dd,  $J = 8.9, 3.0$  Hz, 1H), 5.63 (d,  $J = 39.6$  Hz, 1H), 3.89 (d,  $J = 11.1$  Hz, 2H), 3.80 (s, 3H), 3.75 (s, 3H), 2.25 (s, 3H).

**<sup>19</sup>F NMR** (565 MHz, Chloroform-*d*)  $\delta$  -110.71 (dt,  $J = 39.4$  Hz,  $J = 11.0$  Hz).

**<sup>13</sup>C NMR** (151 MHz, Chloroform-*d*)  $\delta$  166.8, 156.4 (d,  $J = 266.5$  Hz), 152.2, 140.8, 137.1 (d,  $J = 2.3$  Hz), 130.0 (d,  $J = 2.6$  Hz), 129.2, 128.5 (d,  $J = 7.2$  Hz), 120.8, 118.4, 116.4, 114.3, 107.1 (d,  $J = 6.9$  Hz), 56.9, 52.1, 46.2 (d,  $J = 32.8$  Hz), 21.2.

**IR** (neat,  $\text{cm}^{-1}$ ):  $\tilde{\nu}$ : 3373, 2925, 1799, 1687, 1617, 1500, 1436, 1298, 1225, 1180, 1088, 1021, 877, 733.

**ESI-HRMS**: mass spectrometry:  $m/z$  calcd for  $\text{C}_{19}\text{H}_{20}\text{O}_3\text{NFNa}$   $[\text{M}+\text{Na}]^+$  352.13194, measured 352.13203.

## 6. General procedure for d

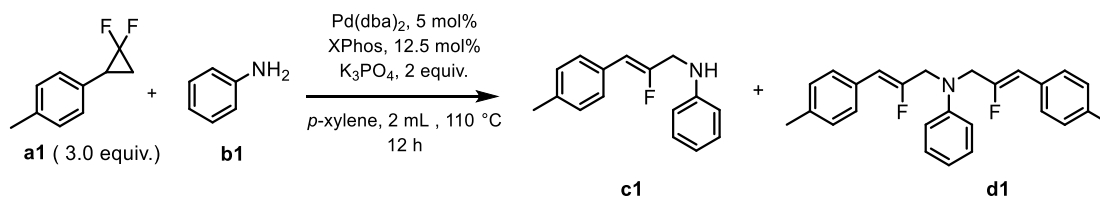

Under  $\text{N}_2$  atmosphere, XPhos (11.9 mg, 0.025 mmol) and  $\text{Pd}(\text{dba})_2$  (5.7 mg, 0.01 mmol), gem-difluorocyclopropanes **a1** (0.6 mmol), aniline **b1** (0.2 mmol),  $\text{K}_3\text{PO}_4$  (2.0 equiv., 84.8 mg) were dissolved in 2 mL *p*-xylene, then the mixture was stirred at 110 °C for about 12 h to the starting

material was consumed (monitored by TLC), the mixture was filtered through celite and the filtrate was concentrated to dryness. A portion of the residue was analyzed with  $^1\text{H}$  NMR to determine selectivity and recovered. The crude was purified by column chromatography to give the products **d**.

## 7. Product characterization of **d**

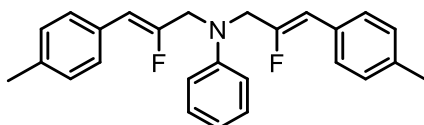

***N,N*-bis((*Z*)-2-fluoro-3-(*p*-tolyl)allyl)aniline**

**d1**: The crude mixture was purified by  $\text{SiO}_2$  gel column chromatography with pentane/EA (from 100:1). 70 mg product was obtained by 90% isolated yield as yellow oil.

$^1\text{H}$  NMR (600 MHz, Chloroform-*d*)  $\delta$  7.28 (d,  $J$  = 8.0 Hz, 4H), 7.16 (broad t,  $J$  = 7.7 Hz, 2H), 7.03 (d,  $J$  = 7.9 Hz, 4H), 6.81 (d,  $J$  = 8.2 Hz, 2H), 6.71 (t,  $J$  = 7.3 Hz, 1H), 5.55 (d,  $J$  = 39.7 Hz, 2H), 4.12 (d,  $J$  = 7.8 Hz, 4H), 2.24 (s, 6H).

$^{19}\text{F}$  NMR (565 MHz, Chloroform-*d*)  $\delta$  -110.48 (dt,  $J$  = 39.8 Hz,  $J$  = 7.9 Hz).

$^{13}\text{C}$  NMR (151 MHz, Chloroform-*d*)  $\delta$  155.4 (d,  $J$  = 269.2 Hz), 148.0, 137.2 (d,  $J$  = 2.2 Hz), 130.0 (d,  $J$  = 2.3 Hz), 129.4, 129.2, 128.6 (d,  $J$  = 7.1 Hz), 118.2, 113.2, 107.1 (d,  $J$  = 6.2 Hz), 51.5 (d,  $J$  = 34.2 Hz), 21.3.

IR (neat,  $\text{cm}^{-1}$ ):  $\tilde{\nu}$ : 3409, 2920, 1909, 1691, 1589, 1504, 1378, 1218, 1129, 951, 906, 733.

ESI-HRMS: mass spectrometry:  $m/z$  calcd for  $\text{C}_{26}\text{H}_{25}\text{NF}_2\text{Na}$  [ $\text{M}+\text{Na}$ ] $^+$  412.18473, measured 412.18445.

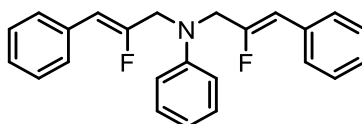

***N,N*-bis((*Z*)-2-fluoro-3-phenylallyl)aniline**

**d2**: The crude mixture was purified by  $\text{SiO}_2$  gel column chromatography with pentane/EA (from 100:1). 68 mg product was obtained by 94% isolated yield as brown solid.

$^1\text{H}$  NMR (600 MHz, Chloroform-*d*)  $\delta$  7.40 (d,  $J$  = 8.0 Hz, 4H), 7.24 (t,  $J$  = 7.7 Hz, 4H), 7.21 – 7.17 (m, 2H), 7.17 – 7.14 (m, 2H), 6.84 (d,  $J$  = 8.4 Hz, 2H), 6.74 (t,  $J$  = 7.3 Hz, 1H), 5.60 (d,  $J$  = 39.5 Hz, 2H), 4.16 (d,  $J$  = 7.5 Hz, 4H).

$^{19}\text{F}$  NMR (565 MHz, Chloroform-*d*)  $\delta$  -109.57 (dt,  $J$  = 39.4 Hz,  $J$  = 7.8 Hz).

$^{13}\text{C}$  NMR (151 MHz, Chloroform-*d*)  $\delta$  155.9 (d,  $J$  = 270.2 Hz), 147.8, 132.8 (d,  $J$  = 2.3 Hz), 129.4, 128.6 (d,  $J$  = 7.2 Hz), 128.5, 127.4 (d,  $J$  = 2.1 Hz), 118.3, 113.2, 107.1 (d,  $J$  = 6.0 Hz), 51.5 (d,  $J$  = 34.3 Hz).

IR (neat,  $\text{cm}^{-1}$ ):  $\tilde{\nu}$ : 3028, 2923, 1910, 1690, 1598, 1499, 1263, 1276, 1178, 1126, 959, 861, 747.

EI-HRMS: mass spectrometry:  $m/z$  calcd for  $\text{C}_{24}\text{H}_{21}\text{NF}_2$  [ $\text{M}$ ] $^+$  361.16366, measured 361.16350.

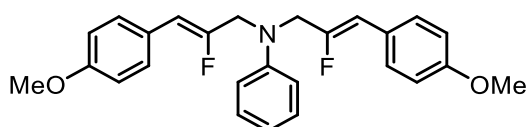

***N,N*-bis((*Z*)-2-fluoro-3-(4-methoxyphenyl)allyl)aniline**

**d3:** The crude mixture was purified by SiO<sub>2</sub> gel column chromatography with pentane/EA (from 50:1). 59 mg product was obtained by 70% isolated yield as yellow solid.

**<sup>1</sup>H NMR** (600 MHz, Chloroform-*d*) δ 7.34 (d, *J* = 8.6 Hz, 4H), 7.17 (t, *J* = 7.8 Hz, 2H), 6.82 (d, *J* = 8.2 Hz, 2H), 6.77 (d, *J* = 8.5 Hz, 4H), 6.72 (t, *J* = 7.3 Hz, 1H), 5.53 (d, *J* = 39.8 Hz, 2H), 4.13 (d, *J* = 8.0 Hz, 4H), 3.71 (s, 6H).

**<sup>19</sup>F NMR** (565 MHz, Chloroform-*d*) δ -112.36 (dt, *J* = 39.9 Hz, *J* = 8.1 Hz).

**<sup>13</sup>C NMR** (151 MHz, Chloroform-*d*) δ 158.8 (d, *J* = 2.5 Hz), 154.5 (d, *J* = 267.8 Hz), 148.0, 129.9 (d, *J* = 7.2 Hz), 129.3, 125.6 (d, *J* = 2.2 Hz), 118.1, 113.9, 113.2, 106.7 (d, *J* = 6.4 Hz), 55.3, 51.4 (d, *J* = 34.1 Hz).

**IR** (neat, cm<sup>-1</sup>): ν̄: 3046, 2930, 1900, 1692, 1601, 1504, 1350, 1247, 1175, 1030, 951, 858, 745.

**ESI-HRMS:** mass spectrometry: *m/z* calcd for C<sub>26</sub>H<sub>25</sub>O<sub>2</sub>NF<sub>2</sub>Na [M+Na]<sup>+</sup> 444.17456, measured 444.17416.

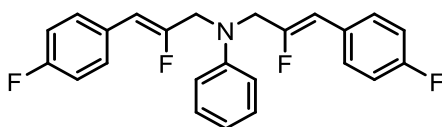

***N,N*-bis((*Z*)-2-fluoro-3-(4-fluorophenyl)allyl)aniline**

**d4:** The crude mixture was purified by SiO<sub>2</sub> gel column chromatography with pentane/EA (from 100:1). 46 mg product was obtained by 58% isolated yield as yellow solid.

**<sup>1</sup>H NMR** (600 MHz, Chloroform-*d*) δ 7.36 (dd, *J* = 8.6 Hz, *J* = 5.5 Hz, 4H), 7.19 (t, *J* = 7.3 Hz, 2H), 6.92 (t, *J* = 8.7 Hz, 4H), 6.82 (d, *J* = 8.2 Hz, 2H), 6.74 (t, *J* = 7.3 Hz, 1H), 5.56 (d, *J* = 39.1 Hz, 2H), 4.14 (d, *J* = 7.5 Hz, 4H).

**<sup>19</sup>F NMR** (565 MHz, Chloroform-*d*) δ -110.77 (dt, *J* = 39.2 Hz, *J* = 7.7 Hz, 2F), -113.89 (m, 2F).

**<sup>13</sup>C NMR** (151 MHz, Chloroform-*d*) δ 161.8 (dd, *J* = 247.5, 3.2 Hz), 155.5 (dd, *J* = 269.7, 2.5 Hz), 147.7, 130.3 (t, *J* = 7.6 Hz), 129.4, 128.9 (t, *J* = 3.0 Hz), 118.4, 115.4 (d, *J* = 21.3 Hz), 113.1, 106.1 (d, *J* = 6.2 Hz), 51.5 (d, *J* = 34.1 Hz).

**IR** (neat, cm<sup>-1</sup>): ν̄: 3382, 2922, 1895, 1692, 1598, 1504, 1379, 1225, 1129, 1017, 956, 857, 744.

**APCI-HRMS:** mass spectrometry: *m/z* calcd for C<sub>24</sub>H<sub>20</sub>NF<sub>4</sub> [M+H]<sup>+</sup> 398.15264, measured 398.15215.

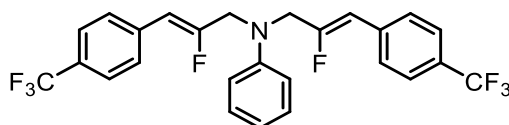

***N,N*-bis((*Z*)-2-fluoro-3-(4-(trifluoromethyl)phenyl)allyl)aniline**

**d5:** The crude mixture was purified by SiO<sub>2</sub> gel column chromatography with pentane/EA (from 50:1). 73 mg product was obtained by 73% isolated yield as brown solid.

**<sup>1</sup>H NMR** (600 MHz, Chloroform-*d*) δ 7.47 (s, 8H), 7.22 – 7.18 (m, 2H), 6.82 (d, *J* = 7.8 Hz, 1H), 6.77 (t, *J* = 7.3 Hz, 1H), 5.65 (d, *J* = 38.6 Hz, 2H), 4.18 (d, *J* = 6.9 Hz, 4H).

**<sup>19</sup>F NMR** (564 MHz, Chloroform-*d*) δ -62.63 (s, 6F), -106.46 (dt, *J* = 38.7 Hz, *J* = 7.1 Hz, 2F).

**<sup>13</sup>C NMR** (151 MHz, Chloroform-*d*) δ 157.6 (d, *J* = 273.6 Hz), 147.4, 136.2, 129.5, 129.2 (qd, *J* = 32.2 Hz, *J* = 1.7 Hz), 128.7 (d, *J* = 7.3 Hz), 125.4 (q, *J* = 3.7 Hz), 124.1 (q, *J* = 271.9 Hz), 118.8, 113.2, 106.1 (d, *J* = 5.6 Hz), 51.7 (d, *J* = 34.2 Hz).

**IR** (neat, cm<sup>-1</sup>): ν̄: 2924, 1932, 1691, 1599, 1502, 1415, 1381, 1322, 1215, 1114, 1016, 946, 862, 752.

**ESI-HRMS:** mass spectrometry:  $m/z$  calcd for  $C_{26}H_{20}NF_8$   $[M+H]^+$  498.14625, measured 498.14532.

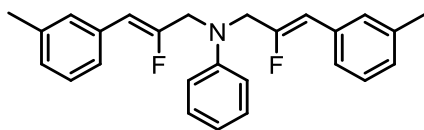

***N,N*-bis((*Z*)-2-fluoro-3-(*m*-tolyl)allyl)aniline**

**d6:** The crude mixture was purified by  $SiO_2$  gel column chromatography with pentane/EA (from 100:1). 62 mg product was obtained by 80% isolated yield as brown oil.

**$^1H$  NMR** (600 MHz, Chloroform-*d*)  $\delta$  7.23 – 7.20 (m, 4H), 7.20 – 7.16 (m, 2H), 7.13 (t,  $J = 7.9$  Hz, 2H), 6.97 (d,  $J = 7.6$  Hz, 2H), 6.83 (d,  $J = 7.6$  Hz, 2H), 6.73 (t,  $J = 7.4$  Hz, 1H), 5.57 (d,  $J = 39.7$  Hz, 2H), 4.15 (d,  $J = 7.6$  Hz, 4H), 2.25 (s, 6H).

**$^{19}F$  NMR** (565 MHz, Chloroform-*d*)  $\delta$  -109.63 (dt,  $J = 39.4$  Hz,  $J = 7.9$  Hz).

**$^{13}C$  NMR** (151 MHz, Chloroform-*d*)  $\delta$  155.7 (d,  $J = 270.2$  Hz), 147.9, 138.1, 132.7 (d,  $J = 2.4$  Hz), 129.4, 129.3, 128.4, 128.1 (d,  $J = 2.0$  Hz), 125.7 (d,  $J = 7.4$  Hz), 118.3, 113.2, 107.2 (d,  $J = 6.0$  Hz), 51.5 (d,  $J = 34.2$  Hz), 21.4.

**IR** (neat,  $cm^{-1}$ ):  $\tilde{\nu}$ : 3384, 2921, 1925, 1690, 1598, 1501, 1379, 1302, 1219, 1129, 991, 949, 780.

**APCI-HRMS:** mass spectrometry:  $m/z$  calcd for  $C_{26}H_{26}NF_2$   $[M+H]^+$  390.20278, measured 390.20290.

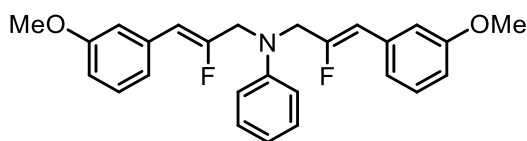

***N,N*-bis((*Z*)-2-fluoro-3-(3-methoxyphenyl)allyl)aniline**

**d7:** The crude mixture was purified by  $SiO_2$  gel column chromatography with pentane/EA (from 50:1). 82 mg product was obtained by 97% isolated yield as yellow solid.

**$^1H$  NMR** (600 MHz, Chloroform-*d*)  $\delta$  7.20 – 7.16 (m, 2H), 7.14 (t,  $J = 7.9$  Hz, 2H), 6.99 – 6.94 (m, 4H), 6.82 (d,  $J = 8.3$  Hz, 2H), 6.75 – 6.69 (m, 3H), 5.57 (d,  $J = 39.2$  Hz, 2H), 4.13 (d,  $J = 7.5$  Hz, 4H), 3.69 (s, 6H).

**$^{19}F$  NMR** (565 MHz, Chloroform-*d*)  $\delta$  -108.74 (dt,  $J = 39.2$  Hz,  $J = 7.8$  Hz).

**$^{13}C$  NMR** (151 MHz, Chloroform-*d*)  $\delta$  159.7, 156.1 (d,  $J = 270.9$  Hz), 147.8, 134.1 (d,  $J = 2.3$  Hz), 129.5, 129.4, 121.3 (d,  $J = 6.9$  Hz), 118.4, 113.8 (d,  $J = 7.6$  Hz), 113.4 (d,  $J = 1.4$  Hz), 113.2, 107.1 (d,  $J = 5.5$  Hz), 55.2, 51.5 (d,  $J = 34.1$  Hz).

**IR** (neat,  $cm^{-1}$ ):  $\tilde{\nu}$ : 3003, 2936, 1921, 1690, 1596, 1498, 1432, 1380, 1293, 1221, 1162, 1045, 907, 778.

**ESI-HRMS:** mass spectrometry:  $m/z$  calcd for  $C_{26}H_{26}O_2NF_2$   $[M+H]^+$  422.19261, measured 422.19217.

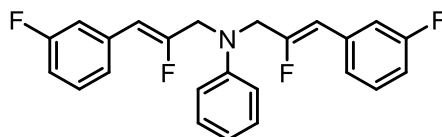

***N,N*-bis((*Z*)-2-fluoro-3-(3-fluorophenyl)allyl)aniline**

**d8:** The crude mixture was purified by  $SiO_2$  gel column chromatography with pentane/EA (from 100:1). 56 mg product was obtained by 70% isolated yield as brown oil.

**<sup>1</sup>H NMR** (600 MHz, Chloroform-*d*) δ 7.22 – 7.13 (m, 6H), 7.10 (d, *J* = 7.8 Hz, 2H), 6.85 (td, *J* = 8.4 Hz, *J* = 2.5 Hz, 2H), 6.81 (d, *J* = 8.2 Hz, 2H), 6.75 (t, *J* = 7.3 Hz, 1H), 5.58 (d, *J* = 38.6 Hz, 2H), 4.15 (d, *J* = 7.2 Hz, 4H).

**<sup>19</sup>F NMR** (565 MHz, Chloroform-*d*) δ -107.57 (dt, *J* = 38.4 Hz, *J* = 7.3 Hz, 2F), -113.11 (m, 2F).

**<sup>13</sup>C NMR** (151 MHz, Chloroform-*d*) δ 162.8 (d, *J* = 244.8 Hz), 156.8 (d, *J* = 272.1 Hz), 147.5, 134.8 (dd, *J* = 8.5, 2.1 Hz), 129.9 (d, *J* = 8.4 Hz), 129.5, 124.4 (dd, *J* = 6.5, 2.9 Hz), 118.6, 115.3 (dd, *J* = 22.7, 8.6 Hz), 114.3 (dd, *J* = 20.9 Hz, *J* = 1.4 Hz), 113.2, 106.3 (dd, *J* = 5.7, 2.6 Hz), 51.6 (d, *J* = 34.2 Hz).

**IR** (neat, cm<sup>-1</sup>):  $\tilde{\nu}$ : 3383, 2922, 1923, 1691, 1584, 1441, 1380, 1281, 1221, 1151, 1079, 966, 779.

**APCI-HRMS**: mass spectrometry: *m/z* calcd for C<sub>24</sub>H<sub>20</sub>NF<sub>4</sub> [M+H]<sup>+</sup> 398.15264, measured 398.15290.

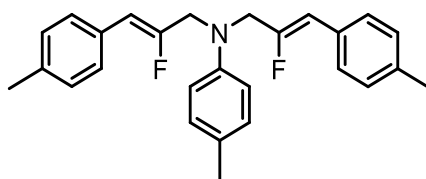

***N,N*-bis((*Z*)-2-fluoro-3-(*p*-tolyl)allyl)-4-methylaniline**

**d9**: The crude mixture was purified by SiO<sub>2</sub> gel column chromatography with pentane/EA (from 100:1). 73 mg product was obtained by 90% isolated yield as brown oil.

**<sup>1</sup>H NMR** (600 MHz, Chloroform-*d*) δ 7.28 (d, *J* = 8.0 Hz, 4H), 7.03 (d, *J* = 7.9 Hz, 4H), 6.97 (d, *J* = 8.3 Hz, 2H), 6.73 (d, *J* = 8.6 Hz, 2H), 5.54 (d, *J* = 39.8 Hz, 2H), 4.09 (d, *J* = 7.9 Hz, 4H), 2.24 (s, 6H), 2.17 (s, 3H).

**<sup>19</sup>F NMR** (565 MHz, Chloroform-*d*) δ -110.29 (dt, *J* = 39.9 Hz, *J* = 8.0 Hz).

**<sup>13</sup>C NMR** (151 MHz, Chloroform-*d*) δ 155.6 (d, *J* = 269.4 Hz), 145.8, 137.1 (d, *J* = 2.2 Hz), 130.1 (d, *J* = 2.0 Hz), 129.9, 129.2, 128.5 (d, *J* = 6.9 Hz), 127.5, 113.5, 107.0 (d, *J* = 6.1 Hz), 51.7 (d, *J* = 34.0 Hz), 21.3, 20.3.

**IR** (neat, cm<sup>-1</sup>):  $\tilde{\nu}$ : 3385, 2920, 1906, 1692, 1615, 1515, 1377, 1214, 1131, 949, 906, 804, 730.

**APCI-HRMS**: mass spectrometry: *m/z* calcd for C<sub>27</sub>H<sub>28</sub>NF<sub>2</sub> [M+H]<sup>+</sup> 404.21843, measured 404.21861.

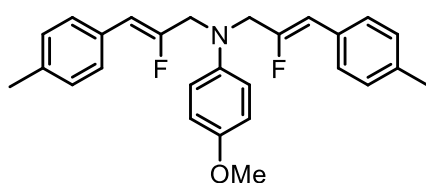

***N,N*-bis((*Z*)-2-fluoro-3-(*p*-tolyl)allyl)-4-methoxyaniline**

**d10**: The crude mixture was purified by SiO<sub>2</sub> gel column chromatography with pentane/EA (from 80:1). 78 mg product was obtained by 93% isolated yield as brown solid.

**<sup>1</sup>H NMR** (600 MHz, Chloroform-*d*) δ 7.28 (d, *J* = 8.1 Hz, 4H), 7.03 (d, *J* = 7.9 Hz, 4H), 6.80 – 6.72 (second order m, 4H), 5.54 (d, *J* = 39.8 Hz, 2H), 4.05 (d, *J* = 9.0 Hz, 4H), 3.65 (s, 3H), 2.23 (s, 6H).

**<sup>19</sup>F NMR** (565 MHz, Chloroform-*d*) δ -109.90 (dt, *J* = 39.9 Hz, *J* = 8.9 Hz).

**<sup>13</sup>C NMR** (151 MHz, Chloroform-*d*) δ 155.9 (d, *J* = 269.5 Hz), 152.7, 142.5, 137.1 (d, *J* = 2.0 Hz), 130.1 (d, *J* = 2.2 Hz), 129.2, 128.5 (d, *J* = 7.0 Hz), 115.4, 114.8, 107.3 (d, *J* = 6.2 Hz), 55.7, 52.3 (d, *J* = 33.2 Hz), 21.3.

**IR** (neat, cm<sup>-1</sup>):  $\tilde{\nu}$ : 3374, 2914, 1912, 1690, 1611, 1508, 1377, 1286, 1243, 1153, 1030, 909, 814.

**ESI-HRMS**: mass spectrometry: *m/z* calcd for C<sub>27</sub>H<sub>28</sub>ONF<sub>2</sub> [M+H]<sup>+</sup> 420.21335, measured 420.21279.

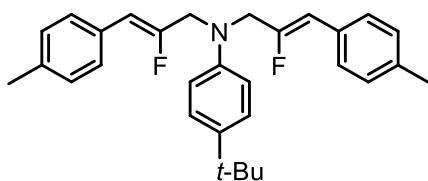

**4-(tert-butyl)-N,N-bis((Z)-2-fluoro-3-(p-tolyl)allyl)aniline**

**d11:** The crude mixture was purified by SiO<sub>2</sub> gel column chromatography with pentane/EA (from 100:1). 82 mg product was obtained by 92% isolated yield as brown oil.

**<sup>1</sup>H NMR** (600 MHz, Chloroform-*d*) δ 7.29 (d, *J* = 8.2 Hz, 4H), 7.19 (d, *J* = 8.8 Hz, 2H), 7.03 (d, *J* = 7.9 Hz, 4H), 6.77 (d, *J* = 8.8 Hz, 2H), 5.57 (d, *J* = 39.8 Hz, 2H), 4.10 (d, *J* = 7.9 Hz, 4H), 2.24 (s, 6H), 1.20 (s, 9H).

**<sup>19</sup>F NMR** (565 MHz, Chloroform-*d*) δ -110.28 (dt, *J* = 40.0 Hz, *J* = 8.0 Hz).

**<sup>13</sup>C NMR** (151 MHz, Chloroform-*d*) δ 155.6 (d, *J* = 269.4 Hz), 145.7, 140.8, 137.1 (d, *J* = 1.9 Hz), 130.1 (d, *J* = 2.0 Hz), 129.2, 128.6 (d, *J* = 7.0 Hz), 126.2, 112.9, 107.0 (d, *J* = 6.0 Hz), 51.6 (d, *J* = 34.1 Hz), 33.9, 31.5, 21.3.

**IR** (neat, cm<sup>-1</sup>):  $\tilde{\nu}$ : 3390, 2958, 1907, 1692, 1612, 1516, 1452, 1367, 1208, 1130, 954, 906, 810.

**ESI-HRMS:** mass spectrometry: *m/z* calcd for C<sub>30</sub>H<sub>33</sub>NF<sub>2</sub>Na [M+Na]<sup>+</sup> 468.24733, measured 468.24661.

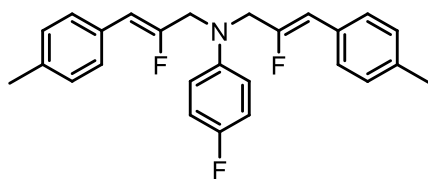

**4-fluoro-N,N-bis((Z)-2-fluoro-3-(p-tolyl)allyl)aniline**

**d12:** The crude mixture was purified by SiO<sub>2</sub> gel column chromatography with pentane/EA (from 100:1). 67 mg product was obtained by 82% isolated yield as brown oil.

**<sup>1</sup>H NMR** (600 MHz, Chloroform-*d*) δ 7.29 (d, *J* = 8.0 Hz, 4H), 7.05 (d, *J* = 7.9 Hz, 4H), 6.86 (t, *J* = 8.7 Hz, 2H), 6.78 – 6.73 (m, 2H), 5.54 (d, *J* = 39.6 Hz, 2H), 4.08 (d, *J* = 8.9 Hz, 4H), 2.25 (s, 6H).

**<sup>19</sup>F NMR** (564 MHz, Chloroform-*d*) δ -110.43 (dt, *J* = 39.7 Hz, *J* = 8.8 Hz, 2F), -126.96 (m, 1F).

**<sup>13</sup>C NMR** (151 MHz, Chloroform-*d*) δ 156.3 (d, *J* = 237.2 Hz), 155.3 (d, *J* = 269.3 Hz), 144.6 (d, *J* = 2.2 Hz), 137.3 (d, *J* = 2.3 Hz), 129.9 (d, *J* = 2.3 Hz), 129.2, 128.5 (d, *J* = 7.1 Hz), 115.7 (d, *J* = 22.2 Hz), 114.8 (d, *J* = 7.5 Hz), 107.4 (d, *J* = 6.3 Hz), 52.1 (d, *J* = 33.3 Hz), 21.3.

**IR** (neat, cm<sup>-1</sup>):  $\tilde{\nu}$ : 3380, 2019, 1906, 1687, 1611, 1508, 1438, 1367, 1218, 1142, 937, 811, 734.

**EI-HRMS:** mass spectrometry: *m/z* calcd for C<sub>26</sub>H<sub>24</sub>NF<sub>3</sub> [M]<sup>+</sup> 407.18554, measured 407.18525.

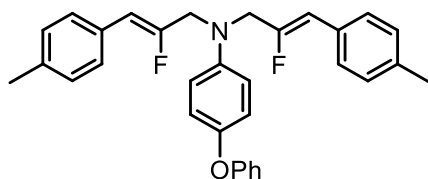

**N,N-bis((Z)-2-fluoro-3-(p-tolyl)allyl)-4-phenoxyaniline**

**d13:** The crude mixture was purified by SiO<sub>2</sub> gel column chromatography with pentane/EA (from 80:1). 70 mg product was obtained by 73% isolated yield as brown oil.

**<sup>1</sup>H NMR** (600 MHz, Chloroform-*d*) δ 7.45 (d, *J* = 8.0 Hz, 4H), 7.37 – 7.32 (m, 2H), 7.20 (d, *J* = 7.9 Hz, 4H), 7.08 (t, *J* = 7.3 Hz, 1H), 7.04 – 6.99 (m, 4H), 6.97 – 6.92 (m, 2H), 5.72 (d, *J* = 39.6 Hz, 2H), 4.25 (d, *J* = 8.9 Hz, 4H), 2.40 (s, 6H).

**<sup>19</sup>F NMR** (565 MHz, Chloroform-*d*) δ -110.27 (dt, *J* = 39.4 Hz, *J* = 8.9 Hz).

**<sup>13</sup>C NMR** (151 MHz, Chloroform-*d*) δ 158.7, 155.4 (d, *J* = 269.2 Hz), 148.6, 144.6, 137.3 (d, *J* = 2.1 Hz), 130.0 (d, *J* = 2.1 Hz), 129.6, 129.3, 128.6 (d, *J* = 7.2 Hz), 122.3, 120.8, 117.6, 114.8, 107.4 (d, *J* = 6.2 Hz), 52.0 (d, *J* = 33.3 Hz), 21.3.

**IR** (neat, cm<sup>-1</sup>):  $\tilde{\nu}$ : 3030, 2921, 1906, 1691, 1591, 1508, 1378, 1287, 1234, 1131, 1023, 952, 731.

**ESI-HRMS**: mass spectrometry: *m/z* calcd for C<sub>32</sub>H<sub>30</sub>ONF<sub>2</sub> [M+H]<sup>+</sup> 482.22900, measured 482.22859.

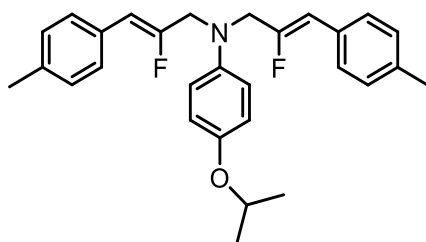

***N,N*-bis((*Z*)-2-fluoro-3-(*p*-tolyl)allyl)-4-isopropoxyaniline**

**d14**: The crude mixture was purified by SiO<sub>2</sub> gel column chromatography with pentane/EA (from 80:1). 75 mg product was obtained by 84% isolated yield as brown oil.

**<sup>1</sup>H NMR** (600 MHz, Chloroform-*d*) δ 7.29 (d, *J* = 8.1 Hz, 4H), 7.04 (d, *J* = 7.9 Hz, 4H), 6.77 – 6.70 (m, 4H), 5.55 (d, *J* = 39.7 Hz, 2H), 4.30 (sept, *J* = 6.1 Hz, 1H), 4.05 (d, *J* = 8.8 Hz, 4H), 2.24 (s, 6H), 1.21 (d, *J* = 6.1 Hz, 6H).

**<sup>19</sup>F NMR** (565 MHz, Chloroform-*d*) δ -109.93 (dt, *J* = 39.8 Hz, *J* = 8.9 Hz).

**<sup>13</sup>C NMR** (151 MHz, Chloroform-*d*) δ 155.8 (d, *J* = 269.5 Hz), 150.8, 142.6, 137.1 (d, *J* = 2.2 Hz), 130.1 (d, *J* = 2.1 Hz), 129.2, 128.5 (d, *J* = 7.1 Hz), 117.5, 115.2, 107.2 (d, *J* = 6.1 Hz), 70.8, 52.2 (d, *J* = 33.3 Hz), 22.3, 21.3.

**IR** (neat, cm<sup>-1</sup>):  $\tilde{\nu}$ : 3384, 2975, 1908, 1691, 1612, 1509, 1449, 1375, 1238, 1126, 1040, 953, 860, 731.

**EI-HRMS**: mass spectrometry: *m/z* calcd for C<sub>29</sub>H<sub>31</sub>ONF<sub>2</sub> [M]<sup>+</sup> 447.23682, measured 447.23659.

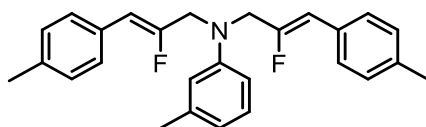

***N,N*-bis((*Z*)-2-fluoro-3-(*p*-tolyl)allyl)-3-methylaniline**

**d15**: The crude mixture was purified by SiO<sub>2</sub> gel column chromatography with pentane/EA (from 100:1). 72 mg product was obtained by 89% isolated yield as brown oil.

**<sup>1</sup>H NMR** (600 MHz, Chloroform-*d*) δ 7.45 (d, *J* = 7.9 Hz, 4H), 7.23 – 7.17 (m, 5H), 6.81 – 6.77 (m, 2H), 6.70 (d, *J* = 7.5 Hz, 1H), 5.71 (d, *J* = 39.8 Hz, 2H), 4.27 (d, *J* = 7.5 Hz, 4H), 2.40 (s, 6H), 2.39 (s, 3H).

**<sup>19</sup>F NMR** (565 MHz, Chloroform-*d*) δ -110.40 (dt, *J* = 39.7 Hz, *J* = 7.6 Hz).

**<sup>13</sup>C NMR** (151 MHz, Chloroform-*d*) δ 155.5 (d, *J* = 269.2 Hz), 148.1, 139.1, 137.2 (d, *J* = 2.1 Hz), 130.1 (d, *J* = 2.5 Hz), 129.2, 128.6 (d, *J* = 7.1 Hz), 119.2, 113.9, 110.5, 107.0 (d, *J* = 6.1 Hz), 51.4 (d, *J* = 34.4 Hz), 22.0, 21.3.

**IR** (neat, cm<sup>-1</sup>):  $\tilde{\nu}$ : 3388, 2920, 1907, 1691, 1602, 1497, 1374, 1241, 1179, 1129, 952, 858, 730.

**ESI-HRMS:** mass spectrometry:  $m/z$  calcd for  $C_{27}H_{27}NF_2Na$   $[M+Na]^+$  426.20038, measured 426.19959.

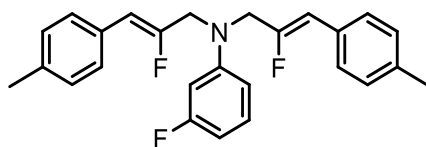

**3-fluoro-N,N-bis((Z)-2-fluoro-3-(p-tolyl)allyl)aniline**

**d16:** The crude mixture was purified by  $SiO_2$  gel column chromatography with pentane/EA (from 100:1). 70 mg product was obtained by 86% isolated yield as brown oil.

**$^1H$  NMR** (600 MHz, Chloroform-*d*)  $\delta$  7.29 (d,  $J = 7.9$  Hz, 4H), 7.09 ( $\approx$ q,  $J = 7.6$  Hz, 1H), 7.05 (d,  $J = 7.9$  Hz, 4H), 6.57 (d,  $J = 8.4$  Hz, 1H), 6.52 (d,  $J = 12.4$  Hz, 1H), 6.41 (t,  $J = 8.2$  Hz, 1H), 5.55 (d,  $J = 39.5$  Hz, 2H), 4.12 (d,  $J = 8.5$  Hz, 4H), 2.25 (s, 6H).

**$^{19}F$  NMR** (565 MHz, Chloroform-*d*)  $\delta$  -110.81 (dt,  $J = 39.2$  Hz,  $J = 8.8$  Hz, 2F), -111.91 (dt,  $J = 12.4$  Hz,  $J = 7.5$  Hz, 1F).

**$^{13}C$  NMR** (151 MHz, Chloroform-*d*)  $\delta$  164.0 (d,  $J = 243.2$  Hz), 154.8 (d,  $J = 268.9$  Hz), 149.7 (d,  $J = 10.4$  Hz), 137.3 (d,  $J = 2.2$  Hz), 130.4 (d,  $J = 10.2$  Hz), 129.8 (d,  $J = 2.3$  Hz), 129.2, 128.5 (d,  $J = 7.1$  Hz), 108.8 (d,  $J = 2.3$  Hz), 107.4 (d,  $J = 6.3$  Hz), 104.7 (d,  $J = 21.3$  Hz), 100.5 (d,  $J = 26.2$  Hz), 51.5 (d,  $J = 33.9$  Hz), 21.3.

**IR** (neat,  $cm^{-1}$ ):  $\tilde{\nu}$ : 3027, 2922, 1906, 1691, 1615, 1498, 1376, 1249, 1131, 1042, 994, 906, 860.

**ESI-HRMS:** mass spectrometry:  $m/z$  calcd for  $C_{26}H_{24}NF_3Na$   $[M+Na]^+$  430.17531, measured 430.17443.

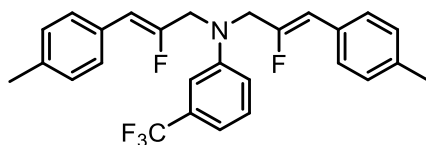

**N,N-bis((Z)-2-fluoro-3-(p-tolyl)allyl)-3-(trifluoromethyl)aniline**

**d17:** The crude mixture was purified by  $SiO_2$  gel column chromatography with pentane/EA (from 80:1). 80 mg product was obtained by 87% isolated yield as brown oil.

**$^1H$  NMR** (600 MHz, Chloroform-*d*)  $\delta$  7.29 (d,  $J = 7.9$  Hz, 4H), 7.24 (t,  $J = 8.0$  Hz, 1H), 7.04 (d+m,  $J = 8.2$  Hz, 5H), 6.95 (d,  $J = 8.2$  Hz, 2H), 5.56 (d,  $J = 39.3$  Hz, 2H), 4.15 (d,  $J = 9.3$  Hz, 4H), 2.24 (s, 6H).

**$^{19}F$  NMR** (564 MHz, Chloroform-*d*)  $\delta$  -62.73 (s, 3F), -110.91 (dt,  $J = 39.4$  Hz,  $J = 9.4$  Hz, 2F).

**$^{13}C$  NMR** (151 MHz, Chloroform-*d*)  $\delta$  154.6 (d,  $J = 268.8$  Hz), 148.2, 137.5 (d,  $J = 2.2$  Hz), 131.7 (q,  $J = 31.7$  Hz), 129.8, 129.7 (d,  $J = 2.4$  Hz), 129.3, 128.6 (d,  $J = 7.1$  Hz), 124.3 (q,  $J = 272.8$  Hz), 116.3, 114.7 (q,  $J = 4.0$  Hz), 109.6 (q,  $J = 3.8$  Hz), 107.8 (d,  $J = 6.4$  Hz), 51.5 (d,  $J = 33.3$  Hz), 21.3.

**IR** (neat,  $cm^{-1}$ ):  $\tilde{\nu}$ : 3418, 2923, 1914, 1686, 1611, 1505, 1433, 1323, 1223, 1161, 1040, 949, 863, 775.

**ESI-HRMS:** mass spectrometry:  $m/z$  calcd for  $C_{27}H_{24}NF_5Na$   $[M+Na]^+$  480.17211, measured 480.17195.

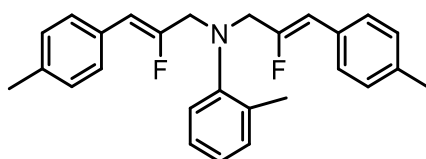

**N,N-bis((Z)-2-fluoro-3-(p-tolyl)allyl)-2-methylaniline**



**d18:** The crude mixture was purified by SiO<sub>2</sub> gel column chromatography with pentane/EA (from 100:1). 66 mg product was obtained by 82% isolated yield as yellow oil.

**<sup>1</sup>H NMR** (600 MHz, Chloroform-*d*) δ 7.27 (d, *J* = 7.8 Hz, 4H), 7.11 (d, *J* = 7.6 Hz, 1H), 7.07 – 7.02 (m, 6H), 6.96 – 6.90 (m, 1H), 5.51 (d, *J* = 38.9 Hz, 2H), 3.82 (d, *J* = 16.1 Hz, 4H), 2.31 (s, 3H), 2.24 (s, 6H).

**<sup>19</sup>F NMR** (565 MHz, Chloroform-*d*) δ -106.80 (dt, *J* = 38.9 Hz, *J* = 16.2 Hz).

**<sup>13</sup>C NMR** (151 MHz, Chloroform-*d*) δ 156.6 (d, *J* = 269.0 Hz), 149.1, 137.1 (d, *J* = 2.1 Hz), 134.4, 131.2, 130.3 (d, *J* = 2.3 Hz), 129.2, 128.5 (d, *J* = 7.3 Hz), 126.4, 124.5, 123.2, 108.9 (d, *J* = 6.8 Hz), 54.6 (d, *J* = 28.0 Hz), 21.3, 18.2.

**IR** (neat, cm<sup>-1</sup>):  $\tilde{\nu}$ : 3381, 2921, 1905, 1688, 1600, 1493, 1372, 1213, 1154, 1035, 939, 858, 766.

**ESI-HRMS:** mass spectrometry: *m/z* calcd for C<sub>27</sub>H<sub>28</sub>NF<sub>2</sub> [M+H]<sup>+</sup> 404.21843, measured 404.21841.

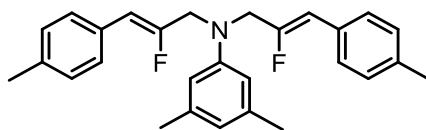

***N,N*-bis((*Z*)-2-fluoro-3-(*p*-tolyl)allyl)-3,5-dimethylaniline**

**d19:** The crude mixture was purified by SiO<sub>2</sub> gel column chromatography with pentane/EA (from 100:1). 67 mg product was obtained by 80% isolated yield as brown oil.

**<sup>1</sup>H NMR** (600 MHz, Chloroform-*d*) δ 7.44 (d, *J* = 7.9 Hz, 4H), 7.19 (d, *J* = 7.9 Hz, 4H), 6.59 (s, 2H), 6.54 (s, 1H), 5.69 (d, *J* = 39.8 Hz, 2H), 4.25 (d, *J* = 7.2 Hz, 4H), 2.39 (s, 6H), 2.33 (s, 6H).

**<sup>19</sup>F NMR** (565 MHz, Chloroform-*d*) δ -110.34 (dt, *J* = 39.9 Hz, *J* = 7.3 Hz).

**<sup>13</sup>C NMR** (151 MHz, Chloroform-*d*) δ 155.5 (d, *J* = 269.4 Hz), 148.2, 139.0, 137.1 (d, *J* = 2.1 Hz), 130.1 (d, *J* = 2.2 Hz), 129.2, 128.5 (d, *J* = 7.2 Hz), 120.3, 111.2, 106.8 (d, *J* = 6.1 Hz), 51.3 (d, *J* = 34.6 Hz), 21.8, 21.3.

**IR** (neat, cm<sup>-1</sup>):  $\tilde{\nu}$ : 3414, 2019, 1904, 1691, 1597, 1511, 1372, 1185, 1129, 1036, 954, 906, 730.

**ESI-HRMS:** mass spectrometry: *m/z* calcd for C<sub>28</sub>H<sub>29</sub>NF<sub>2</sub>Na [M+Na]<sup>+</sup> 440.21603, measured 440.21506.

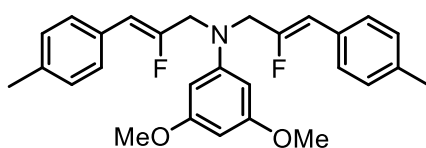

***N,N*-bis((*Z*)-2-fluoro-3-(*p*-tolyl)allyl)-3,5-dimethoxyaniline**

**d20:** The crude mixture was purified by SiO<sub>2</sub> gel column chromatography with pentane/EA (from 60:1). 85 mg product was obtained by 95% isolated yield as brown solid.

**<sup>1</sup>H NMR** (600 MHz, Chloroform-*d*) δ 7.29 (d, *J* = 8.0 Hz, 4H), 7.04 (d, *J* = 8.0 Hz, 4H), 6.01 (d, *J* = 2.0 Hz, 2H), 5.90 (s, 1H), 5.56 (d, *J* = 39.6 Hz, 2H), 4.11 (d, *J* = 8.0 Hz, 4H), 3.67 (s, 6H), 2.25 (s, 6H).

**<sup>19</sup>F NMR** (565 MHz, Chloroform-*d*) δ -110.49 (dt, *J* = 39.8 Hz, *J* = 8.1 Hz).

**<sup>13</sup>C NMR** (151 MHz, Chloroform-*d*) δ 161.7, 155.2 (d, *J* = 269.0 Hz), 145.0, 137.2 (d, *J* = 2.2 Hz), 123.0 (d, *J* = 2.3 Hz), 129.2, 128.5 (d, *J* = 7.0 Hz), 107.2 (d, *J* = 6.2 Hz), 92.7, 90.2, 55.2, 51.5 (d, *J* = 34.2 Hz), 21.3.

**IR** (neat, cm<sup>-1</sup>):  $\tilde{\nu}$ : 3005, 2929, 1911, 1693, 1593, 1485, 1370, 1293, 1198, 1070, 969, 903, 804.

**ESI-HRMS:** mass spectrometry: *m/z* calcd for C<sub>28</sub>H<sub>29</sub>NF<sub>2</sub>Na [M+Na]<sup>+</sup> 472.20586, measured 472.20497.

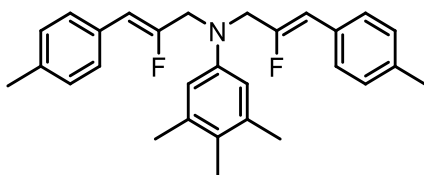

***N,N*-bis((*Z*)-2-fluoro-3-(*p*-tolyl)allyl)-3,4,5-trimethylaniline**

**d21:** The crude mixture was purified by SiO<sub>2</sub> gel column chromatography with pentane/EA (from 100:1). 75 mg product was obtained by 87% isolated yield as brown oil.

**<sup>1</sup>H NMR** (600 MHz, Chloroform-*d*) δ 7.29 (d, *J* = 7.8 Hz, 4H), 7.03 (d, *J* = 7.8 Hz, 4H), 6.50 (s, 2H), 5.55 (d, *J* = 39.9 Hz, 2H), 4.08 (d, *J* = 7.2 Hz, 4H), 2.24 (s, 6H), 2.16 (s, 6H), 2.00 (s, 3H).

**<sup>19</sup>F NMR** (565 MHz, Chloroform-*d*) δ -110.13 (dt, *J* = 39.7 Hz, *J* = 7.6 Hz).

**<sup>13</sup>C NMR** (151 MHz, Chloroform-*d*) δ 155.8 (d, *J* = 269.5 Hz), 145.7, 137.4, 137.1 (d, *J* = 2.0 Hz), 130.2 (d, *J* = 2.2 Hz), 129.2, 128.6 (d, *J* = 7.1 Hz), 125.0, 112.9, 106.8 (d, *J* = 6.2 Hz), 51.4 (d, *J* = 34.4 Hz), 21.3, 21.2, 14.5.

**IR** (neat, cm<sup>-1</sup>): ν̄: 2918, 1906, 1688, 1605, 1496, 1366, 1222, 1179, 1153, 999, 906, 861, 729.

**ESI-HRMS:** mass spectrometry: *m/z* calcd for C<sub>29</sub>H<sub>32</sub>NF<sub>2</sub> [M+H]<sup>+</sup> 432.24973, measured 432.24983.

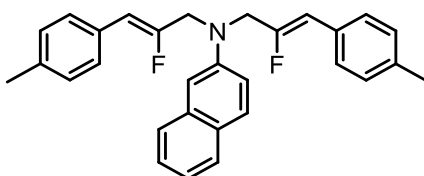

***N,N*-bis((*Z*)-2-fluoro-3-(*p*-tolyl)allyl)naphthalen-2-amine**

**d22:** The crude mixture was purified by SiO<sub>2</sub> gel column chromatography with pentane/EA (from 100:1). 62 mg product was obtained by 71% isolated yield as brown oil.

**<sup>1</sup>H NMR** (600 MHz, Chloroform-*d*) δ 7.65 (d, *J* = 9.0 Hz, 1H), 7.62 (d, *J* = 8.1 Hz, 1H), 7.57 (d, *J* = 8.4 Hz, 1H), 7.29 (d+m, *J* = 8.1 Hz, 5H), 7.17 – 7.14 (m, 2H), 7.07 (d, *J* = 2.6 Hz, 1H), 7.04 (d, *J* = 7.9 Hz, 4H), 5.60 (d, *J* = 39.7 Hz, 2H), 4.24 (d, *J* = 7.9 Hz, 4H), 2.24 (s, 6H).

**<sup>19</sup>F NMR** (565 MHz, Chloroform-*d*) δ -110.37 (dt, *J* = 39.9 Hz, *J* = 8.0 Hz).

**<sup>13</sup>C NMR** (151 MHz, Chloroform-*d*) δ 155.3 (d, *J* = 269.2 Hz), 145.8, 137.2 (d, *J* = 2.2 Hz), 134.7, 130.0 (d, *J* = 2.3 Hz), 129.22, 129.16, 128.6 (d, *J* = 7.1 Hz), 127.6, 127.4, 126.48, 126.46, 122.8, 116.1, 107.7, 107.3 (d, *J* = 6.2 Hz), 51.6 (d, *J* = 34.1 Hz), 21.3.

**IR** (neat, cm<sup>-1</sup>): ν̄: 3857, 2922, 1908, 1691, 1628, 1510, 1382, 1213, 1184, 1129, 1040, 955, 831.

**ESI-HRMS:** mass spectrometry: *m/z* calcd for C<sub>30</sub>H<sub>27</sub>NF<sub>2</sub>Na [M+Na]<sup>+</sup> 462.20038, measured 462.19924.

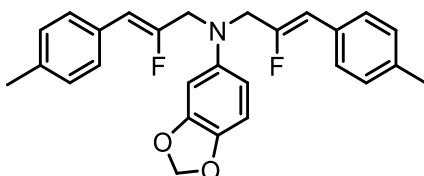

***N,N*-bis((*Z*)-2-fluoro-3-(*p*-tolyl)allyl)benzo[*d*][1,3]dioxol-5-amine**

**d23:** The crude mixture was purified by SiO<sub>2</sub> gel column chromatography with pentane/EA (from 60:1). 45 mg product was obtained by 52% isolated yield as brown solid.

**<sup>1</sup>H NMR** (600 MHz, Chloroform-*d*) δ 7.29 (d, *J* = 7.9 Hz, 4H), 7.05 (d, *J* = 7.9 Hz, 4H), 6.62 (d, *J* = 8.5 Hz, 1H), 6.47 (d, *J* = 2.5 Hz, 1H), 6.26 (dd, *J* = 8.6, 2.5 Hz, 1H), 5.79 (s, 2H), 5.55 (d, *J* = 39.7 Hz, 2H), 4.05 (d, *J* = 9.0 Hz, 4H), 2.25 (s, 6H).

**<sup>19</sup>F NMR** (565 MHz, Chloroform-*d*) δ -110.08 (dt, *J* = 39.5 Hz, *J* = 9.0 Hz).

**<sup>13</sup>C NMR** (151 MHz, Chloroform-*d*) δ 155.5 (d, *J* = 269.3 Hz), 148.5, 144.1, 140.4, 137.2 (d, *J* = 2.1 Hz), 130.0 (d, *J* = 2.3 Hz), 129.2, 128.5 (d, *J* = 7.1 Hz), 108.5, 107.4 (d, *J* = 6.1 Hz), 106.3, 100.9, 97.3, 52.5 (d, *J* = 33.2 Hz), 21.3.

**IR** (neat, cm<sup>-1</sup>):  $\tilde{\nu}$ : 2921, 1911, 1695, 1631, 1502, 1431, 1371, 1274, 1204, 1127, 1034, 965, 807, 731.

**ESI-HRMS**: mass spectrometry: *m/z* calcd for C<sub>27</sub>H<sub>26</sub>O<sub>2</sub>NF<sub>2</sub> [M+H]<sup>+</sup> 434.19261, measured 434.19126.

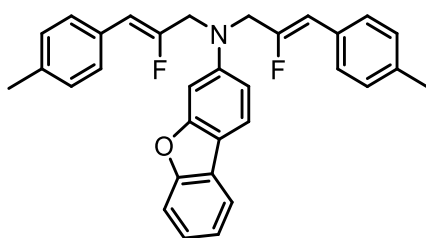

***N,N*-bis((*Z*)-2-fluoro-3-(*p*-tolyl)allyl)dibenzo[*b,d*]furan-3-amine**

**d24**: The crude mixture was purified by SiO<sub>2</sub> gel column chromatography with pentane/EA (from 60:1). 72 mg product was obtained by 75% isolated yield as brown solid.

**<sup>1</sup>H NMR** (600 MHz, Chloroform-*d*) δ 7.72 (d, *J* = 8.0 Hz, 1H), 7.69 (d, *J* = 8.6 Hz, 1H), 7.39 (d, *J* = 8.1 Hz, 1H), 7.31 (d, *J* = 8.0 Hz, 4H), 7.24 (t, *J* = 7.6 Hz, 1H), 7.19 (t, *J* = 7.5 Hz, 1H), 7.05 (d, *J* = 8.0 Hz, 4H), 7.01 (d, *J* = 2.3 Hz, 1H), 6.86 (dd, *J* = 8.6, 2.3 Hz, 1H), 5.61 (d, *J* = 39.6 Hz, 2H), 4.24 (d, *J* = 8.3 Hz, 4H), 2.25 (s, 6H).

**<sup>19</sup>F NMR** (565 MHz, Chloroform-*d*) δ -110.64 (dt, *J* = 39.8 Hz, *J* = 8.2 Hz).

**<sup>13</sup>C NMR** (151 MHz, Chloroform-*d*) δ 158.1, 156.1, 155.0 (d, *J* = 269.2 Hz), 148.4, 137.3 (d, *J* = 2.1 Hz), 129.8 (d, *J* = 2.4 Hz), 129.2, 128.6 (d, *J* = 7.1 Hz), 125.3, 124.6, 122.6, 121.1, 119.5, 115.3, 111.2, 109.5, 107.5 (d, *J* = 6.3 Hz), 96.2, 52.0 (d, *J* = 33.9 Hz), 21.2.

**IR** (neat, cm<sup>-1</sup>):  $\tilde{\nu}$ : 3021, 2920, 1916, 1690, 1601, 1503, 1456, 1377, 1239, 1156, 1010, 943, 811, 721.

**ESI-HRMS**: mass spectrometry: *m/z* calcd for C<sub>32</sub>H<sub>28</sub>ONF<sub>2</sub> [M+H]<sup>+</sup> 480.21335, measured 480.21187.

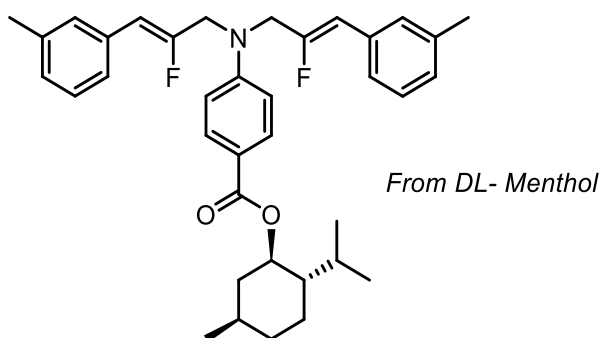

**(1*R*,2*S*,5*R*)-2-isopropyl-5-methylcyclohexyl  
4-(bis((*Z*)-2-fluoro-3-(*m*-tolyl)allyl)amino)benzoate**

**d25**: The crude mixture was purified by SiO<sub>2</sub> gel column chromatography with pentane/EA (from 50:1). 86 mg product was obtained by 75% isolated yield as yellow oil.

**<sup>1</sup>H NMR** (600 MHz, Chloroform-*d*)  $\delta$  7.87 (d,  $J = 8.7$  Hz, 2H), 7.20 (d+m,  $J = 8.5$  Hz, 4H), 7.13 (t,  $J = 7.6$  Hz, 2H), 6.97 (d,  $J = 7.5$  Hz, 2H), 6.80 (d,  $J = 8.7$  Hz, 2H), 5.54 (d,  $J = 39.3$  Hz, 2H), 4.80 (td,  $J = 10.9$  Hz,  $J = 4.4$  Hz, 1H), 4.19 (d,  $J = 7.9$  Hz, 4H), 2.24 (s, 6H), 2.03 (dm,  $J = 12.2$  Hz, 1H), 1.88 (sept.d,  $J = 7.0$  Hz,  $J = 2.6$  Hz, 1H), 1.66 – 1.58 (m, 2H), 1.48 – 1.40 (m, 2H), 1.06 – 0.93 (m, 2H), 0.84 – 0.80 (m, 7H), 0.70 (d,  $J = 6.9$  Hz, 3H).

**<sup>19</sup>F NMR** (565 MHz, Chloroform-*d*)  $\delta$  -110.12 (dt,  $J = 39.3$  Hz,  $J = 8.2$  Hz).

**<sup>13</sup>C NMR** (151 MHz, Chloroform-*d*)  $\delta$  166.1, 154.8 (d,  $J = 269.8$  Hz), 151.1, 138.1, 132.4 (d,  $J = 2.3$  Hz), 131.4, 129.4 (d,  $J = 6.7$  Hz), 128.5, 128.4 (d,  $J = 1.6$  Hz), 125.8 (d,  $J = 7.2$  Hz), 120.3, 112.0, 107.8 (d,  $J = 5.9$  Hz), 74.1, 51.4 (d,  $J = 34.1$  Hz), 47.4, 41.2, 34.4, 31.5, 26.5, 23.8, 22.1, 21.4, 20.8, 16.6.

**IR** (neat,  $\text{cm}^{-1}$ ):  $\tilde{\nu}$ : 3380, 2926, 1937, 1693, 1604, 1519, 1453, 1378, 1279, 1185, 1115, 1039, 961, 732.

**ESI-HRMS**: mass spectrometry:  $m/z$  calcd for  $\text{C}_{37}\text{H}_{43}\text{O}_2\text{NF}_2\text{Na}$   $[\text{M}+\text{Na}]^+$  594.31541, measured 594.31439.

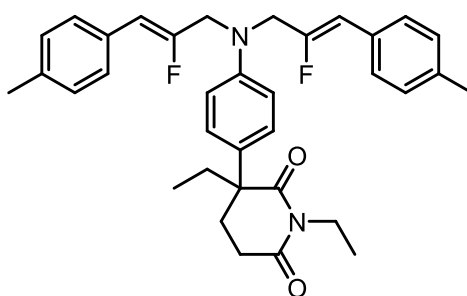

**3-(4-(bis((Z)-2-fluoro-3-(*p*-tolyl)allyl)amino)phenyl)-1,3-diethylpiperidine-2,6-dione**

**d26**: The crude mixture was purified by  $\text{SiO}_2$  gel column chromatography with pentane/EA (from 10:1). 101 mg product was obtained by 90% isolated yield as brown oil.

**<sup>1</sup>H NMR** (600 MHz, Chloroform-*d*)  $\delta$  7.29 (d,  $J = 7.9$  Hz, 4H), 7.04 (d,  $J = 7.8$  Hz, 4H), 6.98 (d,  $J = 8.6$  Hz, 2H), 6.76 (d,  $J = 8.5$  Hz, 2H), 5.54 (d,  $J = 39.6$  Hz, 2H), 4.11 (d,  $J = 8.2$  Hz, 4H), 3.86 – 3.70 (m, 2H), 2.51 (dm,  $J = 17.2$  Hz, 1H), 2.44 – 2.36 (m, 1H), 2.24 (s, 6H), 2.14 (dm,  $J = 13.4$  Hz, 1H), 2.02 (td,  $J = 13.8$  Hz,  $J = 4.7$  Hz, 1H), 1.98 – 1.90 (m, 1H), 1.80 – 1.71 (m, 1H), 1.05 (t,  $J = 7.1$  Hz, 3H), 0.76 (t,  $J = 7.4$  Hz, 3H).

**<sup>19</sup>F NMR** (565 MHz, Chloroform-*d*)  $\delta$  -110.59 (dt,  $J = 39.6$  Hz,  $J = 8.6$  Hz).

**<sup>13</sup>C NMR** (151 MHz, Chloroform-*d*)  $\delta$  175.3, 172.2, 155.1 (d,  $J = 269.1$  Hz), 147.0, 137.3 (d,  $J = 1.7$  Hz), 129.9 (d,  $J = 2.2$  Hz), 129.2, 128.7, 128.6 (d,  $J = 6.9$  Hz), 127.2, 113.3, 107.3 (d,  $J = 6.3$  Hz), 51.4 (d,  $J = 33.9$  Hz), 50.5, 35.3, 33.8, 30.0, 25.9, 21.3, 13.3, 9.2.

**IR** (neat,  $\text{cm}^{-1}$ ):  $\tilde{\nu}$ : 3374, 2972, 1904, 1669, 1516, 1453, 1357, 1212, 1123, 1045, 908, 862, 809, 730.

**ESI-HRMS**: mass spectrometry:  $m/z$  calcd for  $\text{C}_{35}\text{H}_{38}\text{O}_2\text{N}_2\text{F}_2\text{Na}$   $[\text{M}+\text{Na}]^+$  579.27936, measured 579.27783.

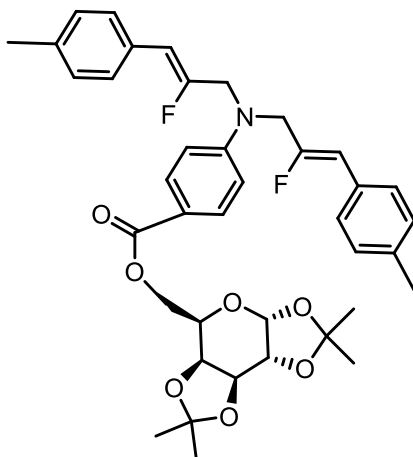

**((3aR,5R,5aS,8aS,8bR)-2,2,7,7-tetramethyltetrahydro-5H-bis([1,3]dioxolo)[4,5-b:4',5'-d]pyran-5-yl)methyl 4-(bis((Z)-2-fluoro-3-(p-tolyl)allyl)amino)benzoate**

**d27:** The crude mixture was purified by SiO<sub>2</sub> gel column chromatography with pentane/EA (from 5:1). 111 mg product was obtained by 82% isolated yield as brown oil.

**<sup>1</sup>H NMR** (600 MHz, Chloroform-*d*) δ 7.87 (d, *J* = 8.6 Hz, 2H), 7.28 (d, *J* = 7.9 Hz, 4H), 7.04 (d, *J* = 7.9 Hz, 4H), 6.79 (d, *J* = 8.7 Hz, 2H), 5.53 (d, *J* = 39.4 Hz, 2H), 5.47 (d, *J* = 4.9 Hz, 1H), 4.55 (dd, *J* = 7.9, 2.4 Hz, 1H), 4.40 (dd, *J* = 11.4 Hz, *J* = 5.1 Hz, 1H), 4.30 (dd, *J* = 11.4 Hz, *J* = 7.3 Hz, 1H), 4.27 – 4.21 (m, 2H), 4.18 (d, *J* = 8.2 Hz, 4H), 4.10 – 4.05 (m, 1H), 2.24 (s, 6H), 1.43 (s, 3H), 1.39 (s, 3H), 1.27 (s, 3H), 1.24 (s, 3H).

**<sup>19</sup>F NMR** (565 MHz, Chloroform-*d*) δ -111.04 (dt, *J* = 39.4 Hz, *J* = 8.4 Hz).

**<sup>13</sup>C NMR** (151 MHz, Chloroform-*d*) δ 166.3, 154.3 (d, *J* = 268.4 Hz), 151.4, 137.4 (d, *J* = 1.7 Hz), 131.6, 129.6 (d, *J* = 2.2 Hz), 129.3, 128.6 (d, *J* = 7.0 Hz), 119.3, 112.0, 109.6, 108.8, 107.6 (d, *J* = 6.2 Hz), 96.4, 71.2, 70.8, 70.6, 66.2, 63.3, 51.2 (d, *J* = 34.1 Hz), 26.1, 26.0, 25.0, 24.5, 21.3.

**IR** (neat, cm<sup>-1</sup>):  $\tilde{\nu}$ : 2986, 1908, 1703, 1604, 1518, 1378, 1323, 1278, 1185, 1105, 1069, 906, 767.

**ESI-HRMS:** mass spectrometry: *m/z* calcd for C<sub>39</sub>H<sub>43</sub>O<sub>7</sub>N<sub>1</sub>F<sub>2</sub>Na [M+Na]<sup>+</sup> 698.28998, measured 698.28961.

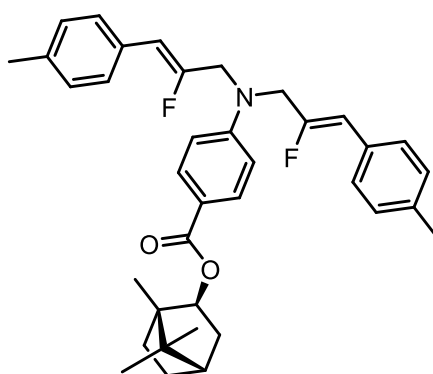

*From DL-Isoborneol*

**(1S,2S,4S)-1,7,7-trimethylbicyclo[2.2.1]heptan-2-yl 4-(bis((Z)-2-fluoro-3-(p-tolyl)allyl)amino)benzoate**

**d28:** The crude mixture was purified by SiO<sub>2</sub> gel column chromatography with pentane/EA (from 10:1). 95 mg product was obtained by 83% isolated yield as brown oil.

**<sup>1</sup>H NMR** (600 MHz, Chloroform-*d*) δ 7.89 (d, *J* = 8.5 Hz, 2H), 7.28 (d, *J* = 7.9 Hz, 4H), 7.05 (d, *J* = 7.8 Hz, 4H), 6.82 (d, *J* = 8.6 Hz, 2H), 5.54 (d, *J* = 39.5 Hz, 2H), 4.99 (d, *J* = 9.4 Hz, 1H), 4.19 (d, *J* = 8.1

Hz, 4H), 2.40 – 2.33 (m, 1H), 2.25 (s, 6H), 2.09 – 2.01 (m, 1H), 1.74 – 1.65 (m, 1H), 1.63 (t,  $J = 4.6$  Hz, 1H), 1.33 – 1.26 (m, 1H), 1.24 – 1.15 (m, 1H), 1.01 (dd,  $J = 13.8, 3.5$  Hz, 1H), 0.87 (s, 3H), 0.82 (s, 3H), 0.81 (s, 3H).

$^{19}\text{F}$  NMR (565 MHz, Chloroform- $d$ )  $\delta$  -111.07 (dt,  $J = 39.6$  Hz,  $J = 8.4$  Hz).

$^{13}\text{C}$  NMR (151 MHz, Chloroform- $d$ )  $\delta$  166.8, 154.4 (d,  $J = 268.7$  Hz), 151.2, 137.4 (d,  $J = 2.1$  Hz), 131.4, 129.7 (d,  $J = 2.2$  Hz), 129.3, 128.6 (d,  $J = 7.0$  Hz), 120.2, 112.0, 107.6 (d,  $J = 6.2$  Hz), 79.8, 51.3 (d,  $J = 34.1$  Hz), 49.1, 47.9, 45.1, 37.0, 28.1, 27.4, 21.3, 19.8, 19.0, 13.6.

IR (neat,  $\text{cm}^{-1}$ ):  $\tilde{\nu}$ : 2954, 1907, 1696, 1604, 1517, 1450, 1377, 1281, 1224, 1185, 1117, 908, 834, 731.

ESI-HRMS: mass spectrometry:  $m/z$  calcd for  $\text{C}_{37}\text{H}_{42}\text{O}_2\text{N}_1\text{F}_2$   $[\text{M}+\text{H}]^+$  570.31781, measured 570.31685.

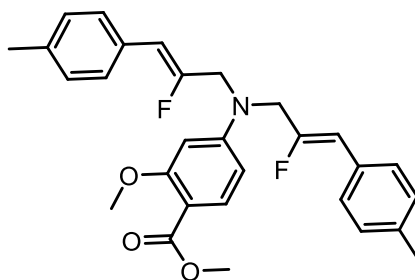

#### methyl 4-(bis((Z)-2-fluoro-3-(*p*-tolyl)allyl)amino)-2-methoxybenzoate

**d29:** The crude mixture was purified by  $\text{SiO}_2$  gel column chromatography with pentane/EA (from 10:1). 78 mg product was obtained by 82% isolated yield as brown oil.

$^1\text{H}$  NMR (600 MHz, Chloroform- $d$ )  $\delta$  7.31 – 7.26 (m, 5H), 7.04 (d,  $J = 7.9$  Hz, 4H), 6.94 (dd,  $J = 9.1, 3.3$  Hz, 1H), 6.81 (d,  $J = 9.1$  Hz, 1H), 5.55 (d,  $J = 39.5$  Hz, 2H), 4.08 (d,  $J = 9.7$  Hz, 4H), 3.79 (s, 3H), 3.74 (s, 3H), 2.24 (s, 6H).

$^{19}\text{F}$  NMR (565 MHz, Chloroform- $d$ )  $\delta$  -110.11 (dt,  $J = 39.8$  Hz,  $J = 9.9$  Hz).

$^{13}\text{C}$  NMR (151 MHz, Chloroform- $d$ )  $\delta$  166.9, 155.3 (d,  $J = 269.0$  Hz), 152.2, 141.9, 137.3 (d,  $J = 2.0$  Hz), 129.9 (d,  $J = 2.3$  Hz), 129.2, 128.5 (d,  $J = 7.1$  Hz), 120.7, 119.3, 117.1, 114.0, 107.7 (d,  $J = 6.2$  Hz), 56.8, 52.13, 52.10 (d,  $J = 32.8$  Hz), 21.3.

IR (neat,  $\text{cm}^{-1}$ ):  $\tilde{\nu}$ : 2948, 1909, 1724, 1613, 1504, 1436, 1294, 1242, 1182, 1082, 1022, 861, 807.

ESI-HRMS: mass spectrometry:  $m/z$  calcd for  $\text{C}_{29}\text{H}_{30}\text{O}_3\text{N}_1\text{F}_2$   $[\text{M}+\text{H}]^+$  478.21883, measured 478.21875.

## 8. Transformation of products

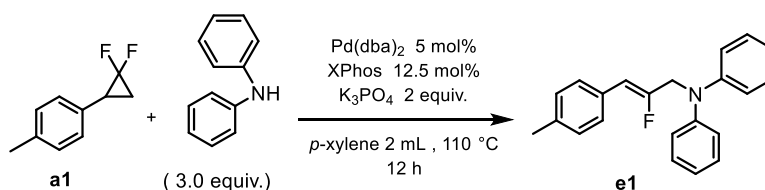

Under  $\text{N}_2$  atmosphere, XPhos (11.9 mg, 0.025 mmol) and  $\text{Pd}(\text{dba})_2$  (5.7 mg, 0.01 mmol), gem-difluorocyclopropane **a1** (0.2 mmol), diphenylamine (0.6 mmol),  $\text{K}_3\text{PO}_4$  (2.0 equiv., 84.8 mg) were dissolved in 2 mL *p*-xylene, then the mixture was stirred at 110 °C for about 12 h to the starting material was consumed (monitored by TLC), the mixture was filtered through celite and the filtrate was concentrated to dryness. The crude was purified by column chromatography to give the product **e1** (95% yield, 60 mg).

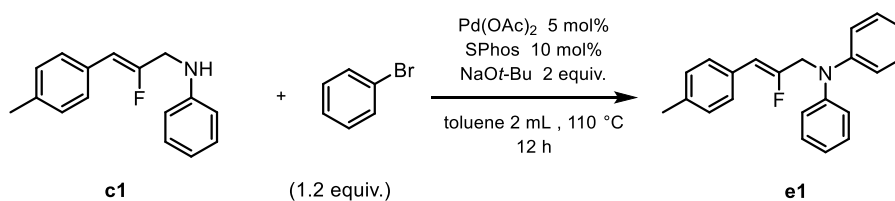

Under  $\text{N}_2$  atmosphere, SPhos (8.2 mg, 0.02 mmol) and  $\text{Pd(OAc)}_2$  (2.2 mg, 0.01 mmol), product **c1** (0.2 mmol), bromobenzene (0.24 mmol),  $\text{NaOt-Bu}$  (2.0 equiv., 38.4 mg) were dissolved in 2 mL toluene, then the mixture was stirred at 110 °C for about 12 h to the starting material was consumed (monitored by TLC), the mixture was filtered through celite and the filtrate was concentrated to dryness. The crude was purified by column chromatography to give the product **e1** (95% yield, 60 mg).

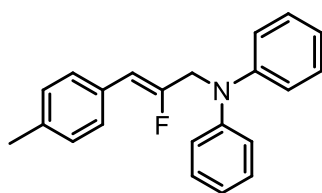

**(Z)-N-(2-fluoro-3-(p-tolyl)allyl)-N-phenylaniline**

**e1**: The crude mixture was purified by  $\text{SiO}_2$  gel column chromatography with pentane/EA (from 100:1). 60 mg product was obtained by 95% isolated yield as yellow oil.

**$^1\text{H NMR}$**  (600 MHz, Chloroform-*d*)  $\delta$  7.25 (d,  $J = 8.0$  Hz, 2H), 7.19 ( $\approx$  t,  $J \approx 7.9$  Hz, 4H), 7.03 – 6.99 (m, 6H), 6.90 (t,  $J = 7.3$  Hz, 2H), 5.61 (d,  $J = 39.9$  Hz, 1H), 4.46 (d,  $J = 6.9$  Hz, 2H), 2.23 (s, 3H).

**$^{19}\text{F NMR}$**  (565 MHz, Chloroform-*d*)  $\delta$  -109.93 (dt,  $J = 40.1, 7.0$  Hz).

**$^{13}\text{C NMR}$**  (151 MHz, Chloroform-*d*)  $\delta$  155.7 (d,  $J = 269.0$  Hz), 147.5, 137.0 (d,  $J = 2.3$  Hz), 130.2 (d,  $J = 2.3$  Hz), 129.4, 129.1, 128.5 (d,  $J = 7.1$  Hz), 121.9, 120.9, 107.1 (d,  $J = 6.2$  Hz), 53.4 (d,  $J = 35.0$  Hz), 21.2.

**IR** (neat,  $\text{cm}^{-1}$ ):  $\tilde{\nu}$ : 3398, 2920, 2325, 2904, 1693, 1588, 1359, 1216, 1134, 1096, 994, 864, 746.

**EI-HRMS**: mass spectrometry:  $m/z$  calcd for  $\text{C}_{22}\text{H}_{20}\text{NF}$   $[\text{M}]^+$  317.15743, measured 317.15730.

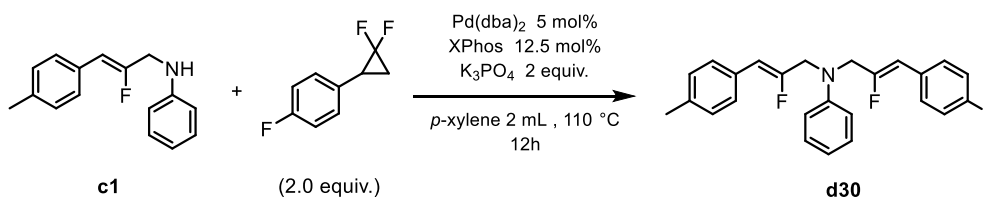

Under  $\text{N}_2$  atmosphere, XPhos (11.9 mg, 0.025 mmol) and  $\text{Pd(dba)}_2$  (5.7 mg, 0.01 mmol), product **c1** (0.2 mmol), 1-(2,2-difluorocyclopropyl)-4-fluorobenzene (0.4 mmol),  $\text{K}_3\text{PO}_4$  (2.0 equiv., 84.8 mg) were dissolved in 2 mL *p*-xylene, then the mixture was stirred at 110 °C for about 12 h to the starting material was consumed (monitored by TLC), the mixture was filtered through celite and the filtrate was concentrated to dryness. A portion of the residue was analyzed with  $^1\text{H NMR}$  to determine selectivity and recovered. The crude was purified by column chromatography to give the products **d30** (64% yield, 50 mg).

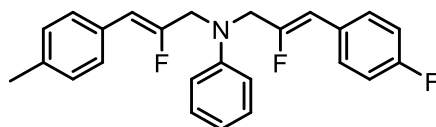

***N*-((*Z*)-2-fluoro-3-(4-fluorophenyl)allyl)-*N*-((*Z*)-2-fluoro-3-(*p*-tolyl)allyl)aniline**

**d30:** The crude mixture was purified by SiO<sub>2</sub> gel column chromatography with pentane/EA (from 100:1). 50 mg product was obtained by 64% isolated yield as brown oil.

**<sup>1</sup>H NMR** (600 MHz, Chloroform-*d*) δ 7.38 – 7.33 (m, 2H), 7.29 (d, *J* = 8.1 Hz, 2H), 7.18 (≈ dd, *J* = 8.8, 7.2 Hz, 2H), 7.04 (d, *J* = 7.9 Hz, 2H), 6.92 (≈ t, *J* = 8.7 Hz, 2H), 6.82 (d, *J* = 7.8 Hz, 2H), 6.73 (t, *J* = 7.3 Hz, 1H), 5.56 (d, *J* = 39.4 Hz, 2H), 4.16 – 4.12 (m, 4H), 2.25 (s, 3H).

**<sup>19</sup>F NMR** (565 MHz, Chloroform-*d*) δ -110.52 (dt, *J* = 39.5, 8.1 Hz, 1F), -110.75 (dt, *J* = 39.2, 7.4 Hz, 1F), -114.00 (m, 1F).

**<sup>13</sup>C NMR** (151 MHz, Chloroform-*d*) δ 161.8 (dd, *J* = 247.3, 3.2 Hz), 155.6 (dd, *J* = 269.6, 2.5 Hz), 155.2 (d, *J* = 269.3 Hz), 147.8, 137.2 (d, *J* = 2.2 Hz), 130.3 (t, *J* = 7.6 Hz), 129.9 (d, *J* = 2.4 Hz), 129.4, 129.2, 129.0 (t, *J* = 2.9 Hz), 128.5 (d, *J* = 6.9 Hz), 118.3, 115.4 (d, *J* = 21.4 Hz), 113.2, 107.2 (d, *J* = 6.1 Hz), 106.0 (d, *J* = 6.1 Hz), 51.6 (d, *J* = 22.7 Hz), 51.4 (d, *J* = 23.0 Hz), 21.3.

**IR** (neat, cm<sup>-1</sup>): ν̄: 3389, 2922, 1896, 1692, 1598, 1504, 1378, 1224, 1129, 1023, 955, 859, 745.

**EI-HRMS:** mass spectrometry: *m/z* calcd for C<sub>25</sub>H<sub>22</sub>NF<sub>3</sub> [M]<sup>+</sup> 393.16989, measured 393.16976.

## 9. Kinetic orders

### 9.1. Kinetic order in *gem*-difluorocyclopropane **a1**:

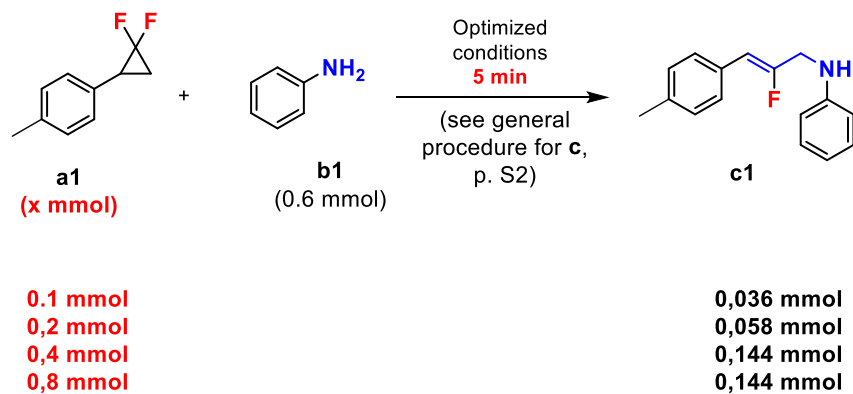

(determined by <sup>1</sup>H NMR analysis, 1,3,5-trimethoxybenzene as an internal standard)

X-axis : Ln(**a1**), Y-axis : Ln(**c1**)



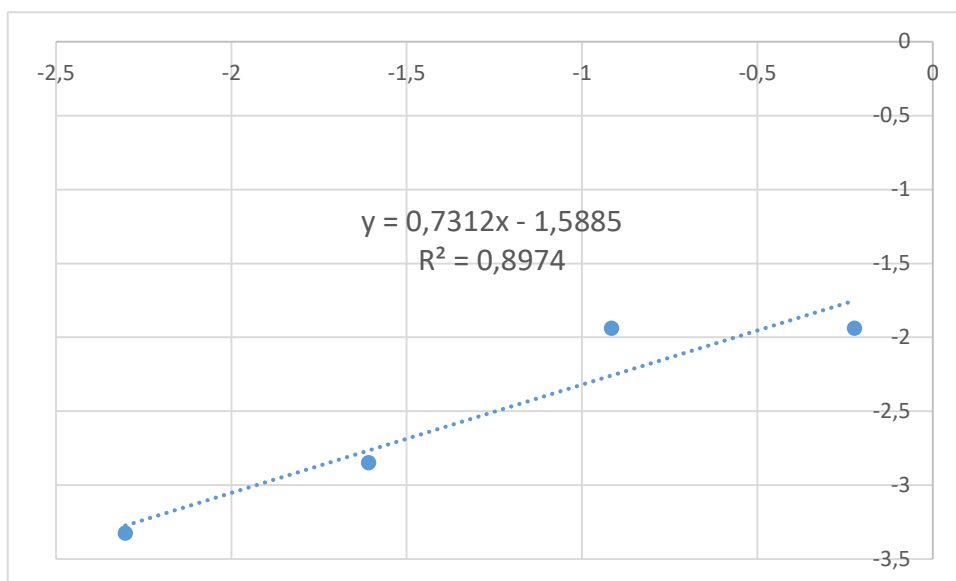

X-axis :  $\ln(a_1)$ , Y-axis :  $\ln(c_1)$ , first 3 points only.

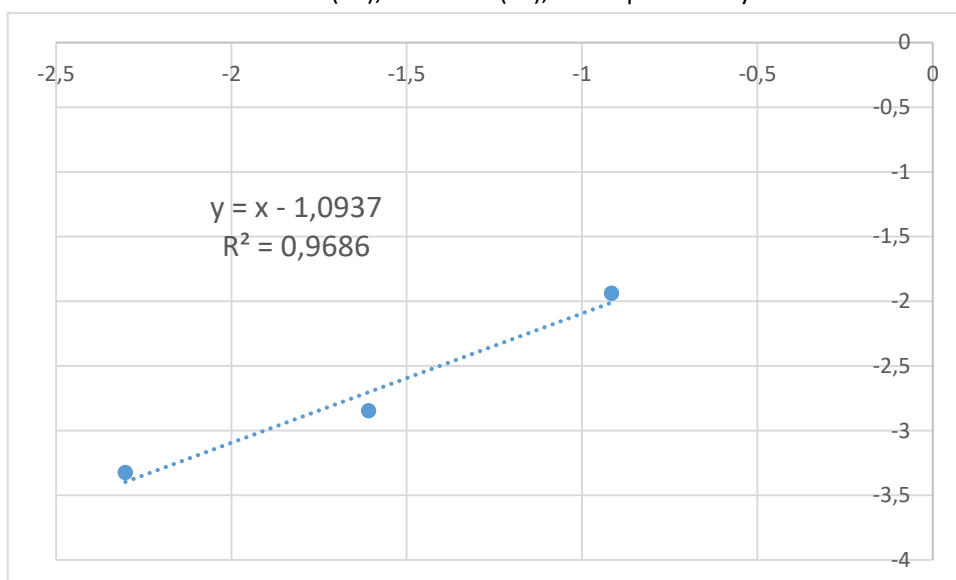

Result: the reaction is first order in *gem*-difluorocyclopropane **a1**.

9.2. Kinetic order in aniline **b1**:

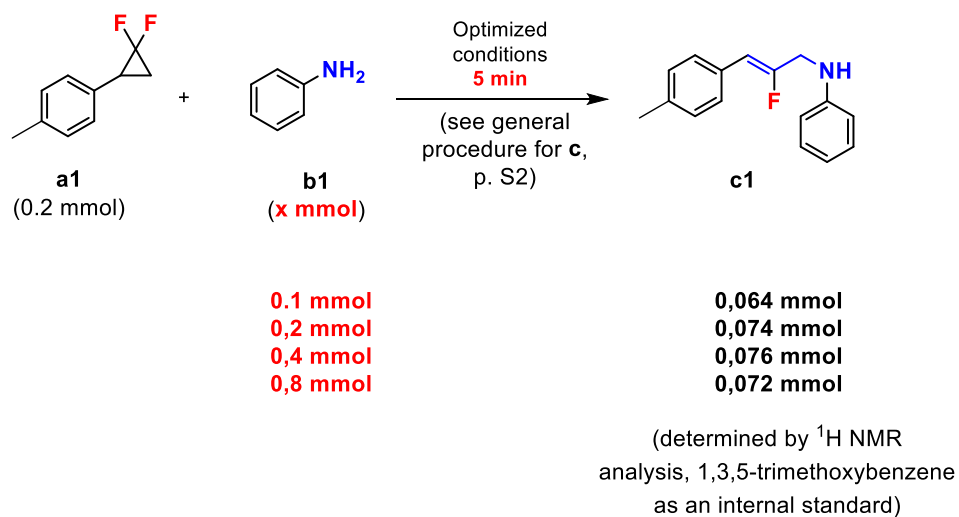

Result: the reaction is approximately zeroth order in aniline **b1**.

## 10. References

- [1] J. Xu, E. A. Ahmed, B. Xiao, Q. Q. Lu, Y. L. Wang, C. G. Yu, Y. Fu, *Angew. Chem. Int. Ed.* **2015**, *54*, 8231.
- [2] L. Y. Lv, C.-J. Li, *Angew. Chem. Int. Ed.* **2021**, *60*, 13098.
- [3] S. Q. Chen, S. Cao, C. Y. Liu, B. X. Wang, X. R. Ren, H. Huang, Z. H. Peng, X. Wang, *Org. Lett.* **2021**, *23*, 7428.
- [4] W. Liu, L. Cao, Z.-Y. Zhang, G. Zhang, S.-Q. Huang, L.-W. Huang, P. Zhao, X. Y. Yan, *Org. Lett.* **2020**, *22*, 2210.

## 11. Copies of $^1\text{H}$ and $^{13}\text{C}$ Spectra

$^1\text{H}$  NMR (c1)

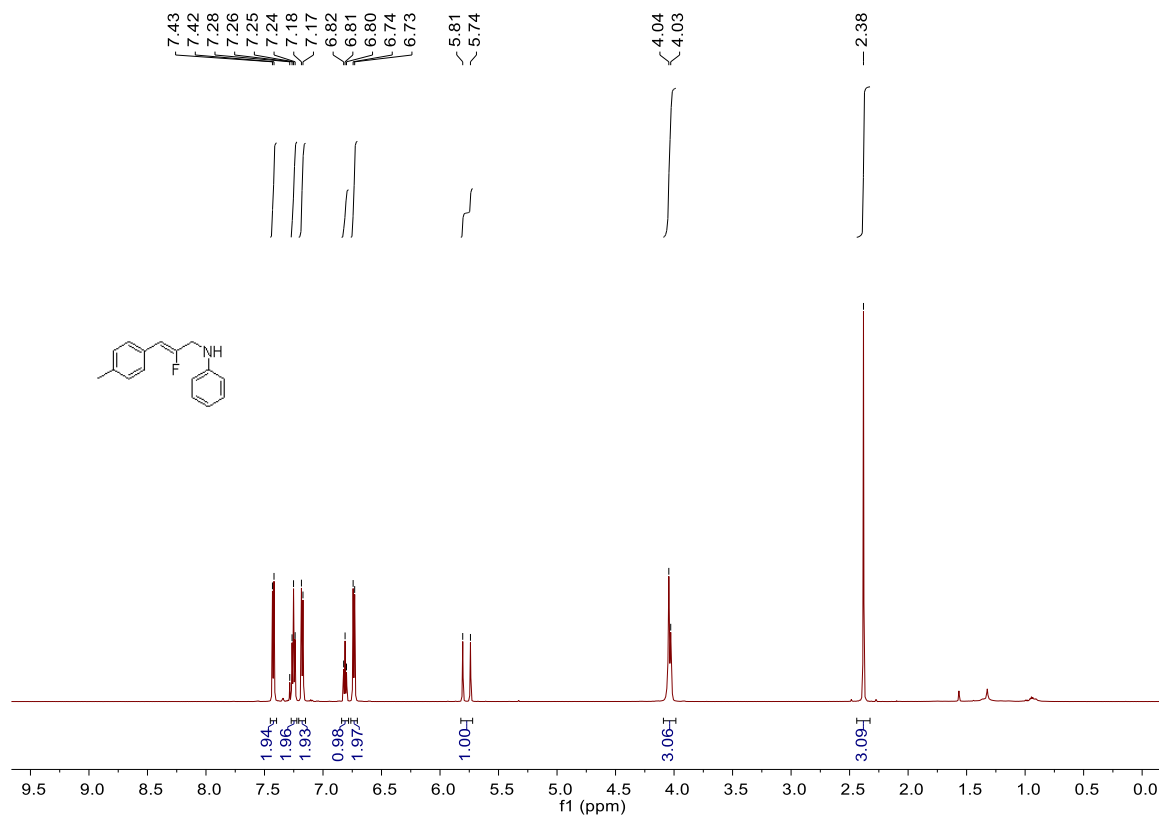

$^{19}\text{F}$  NMR (c1)

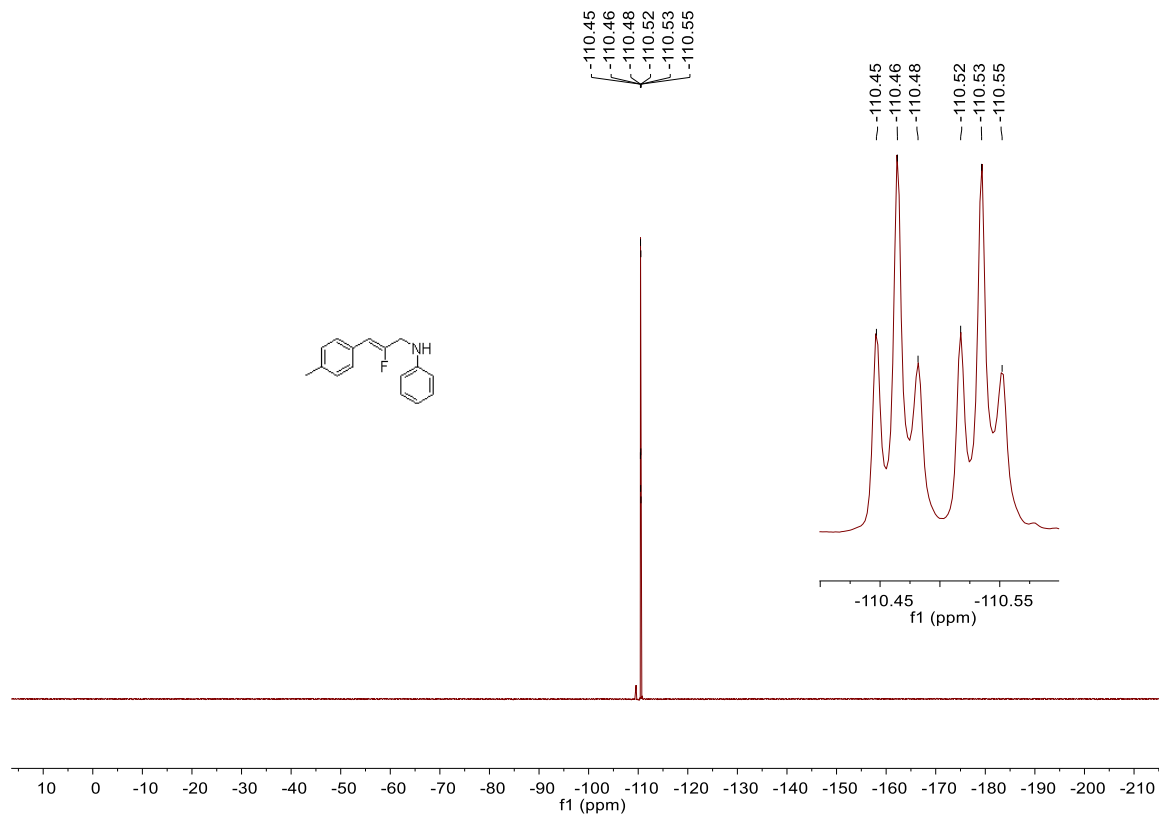

<sup>13</sup>C NMR (c1)

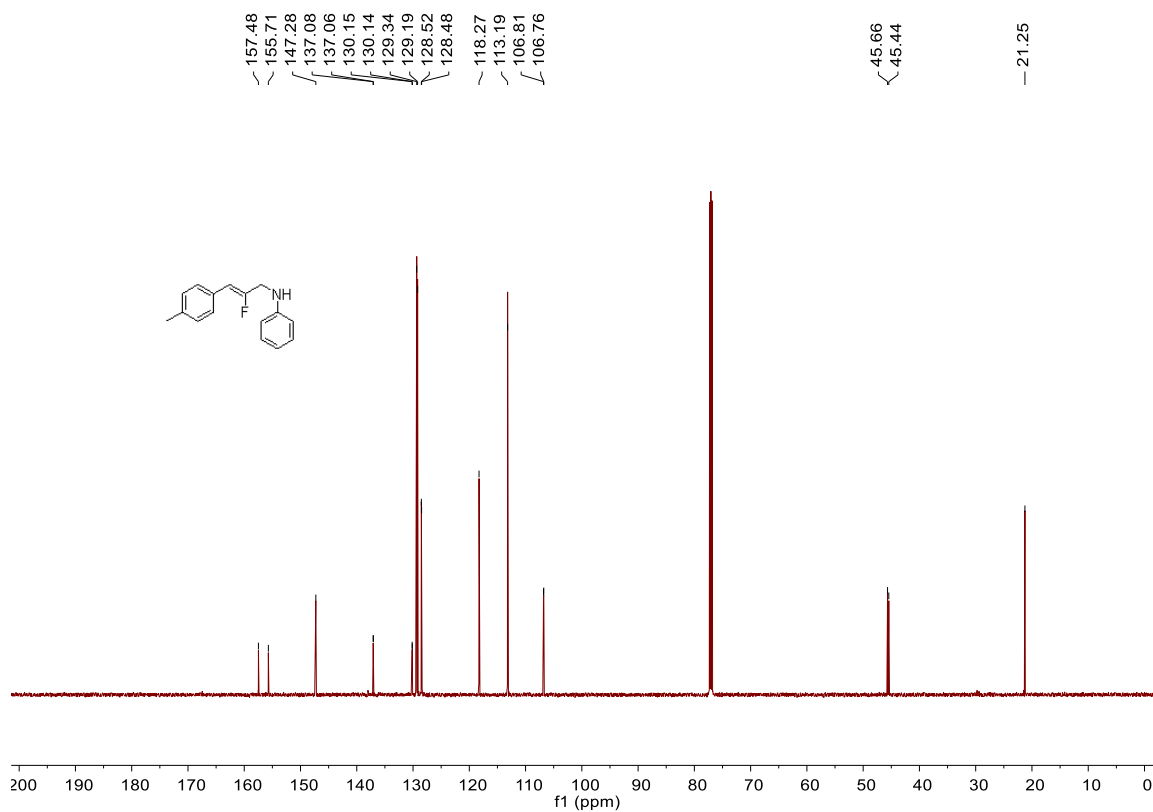

<sup>1</sup>H NMR (c2)

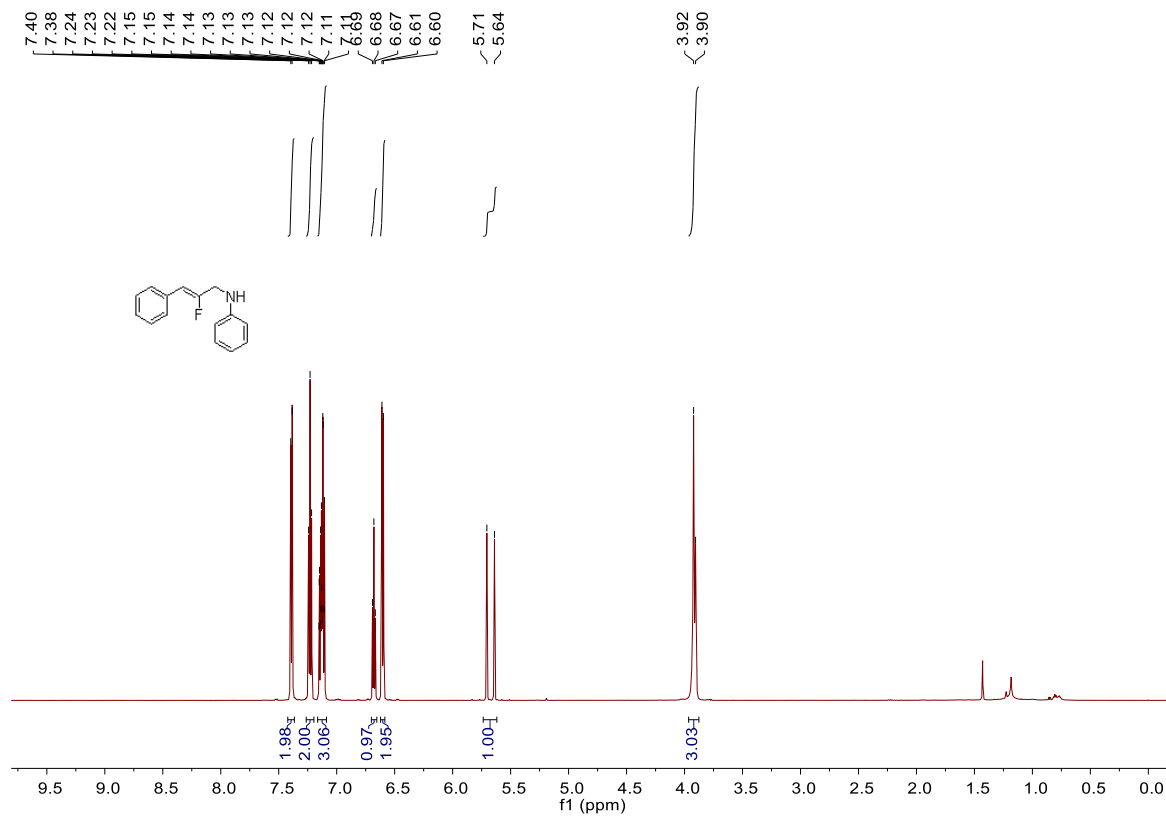

<sup>19</sup>F NMR (c2)

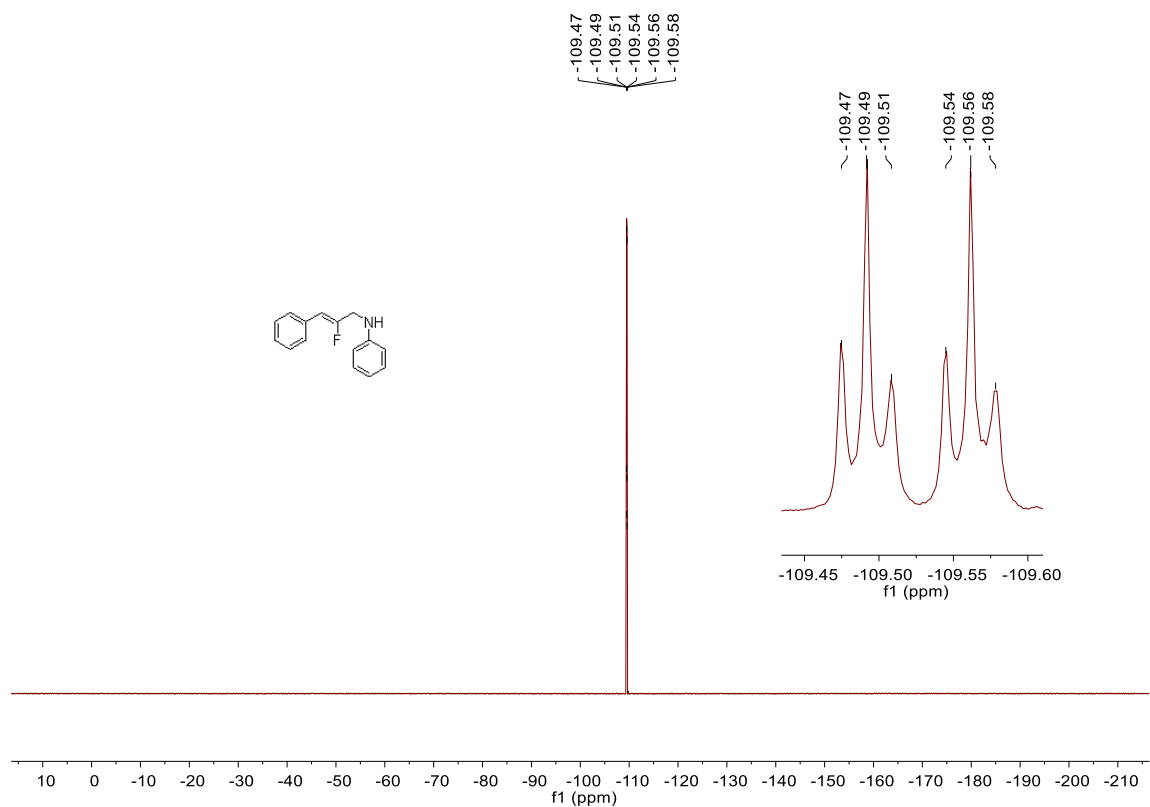

<sup>13</sup>C NMR (c2)

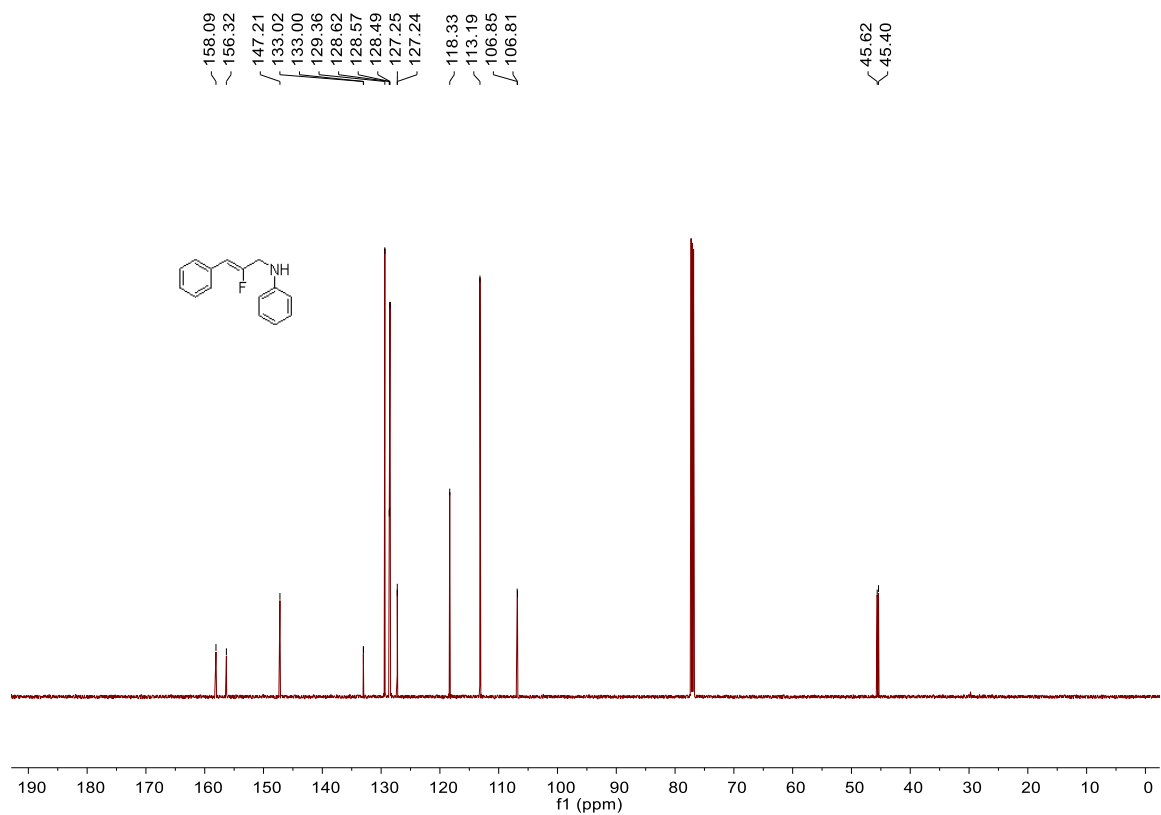

<sup>1</sup>H NMR (c3)

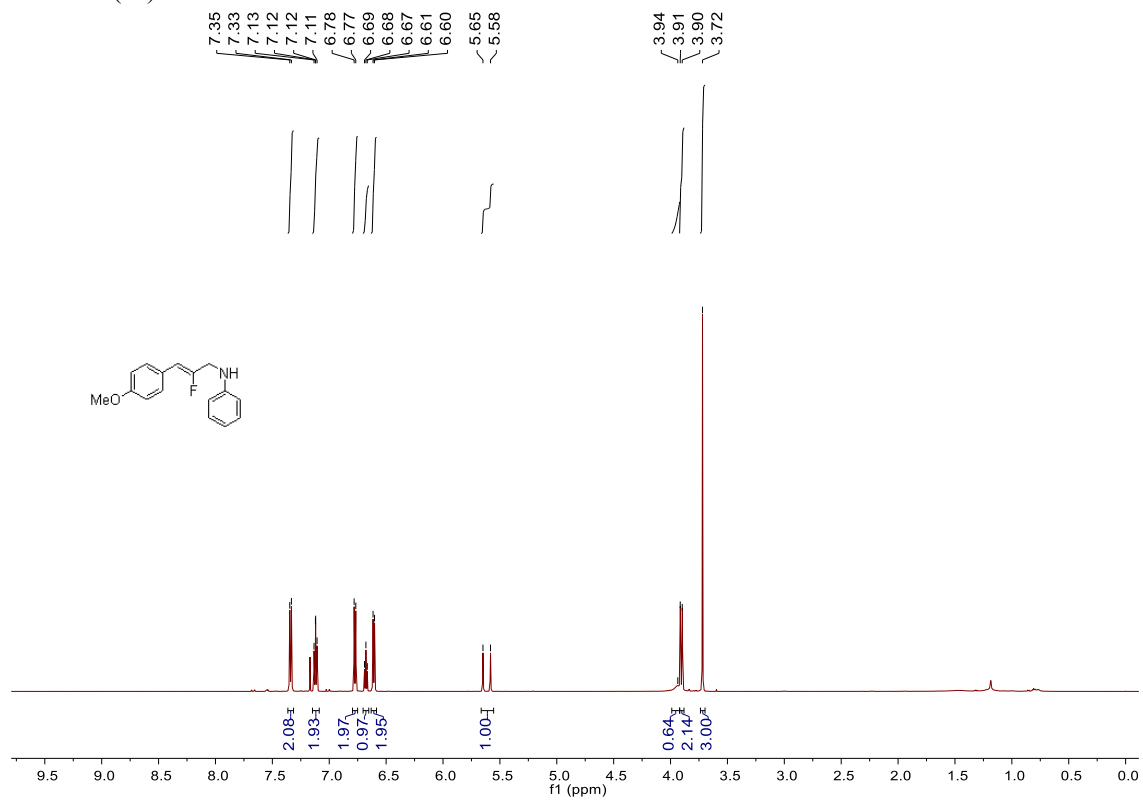

<sup>19</sup>F NMR (c3)

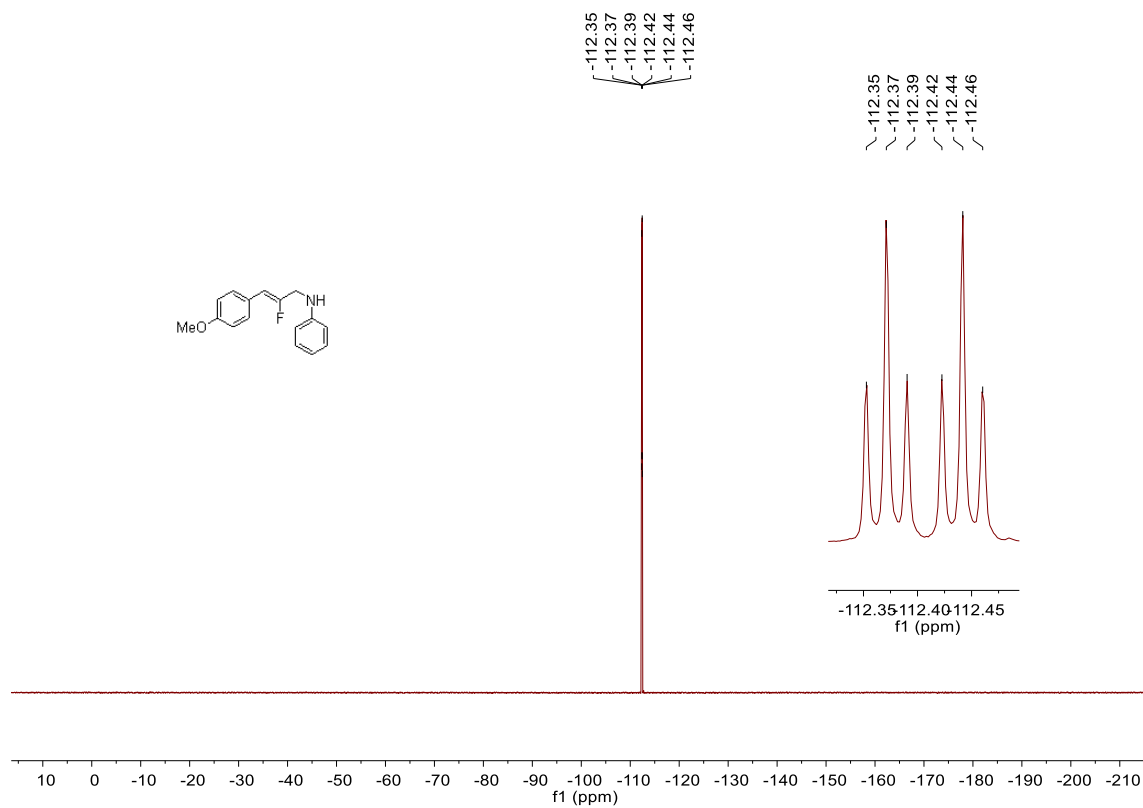

<sup>13</sup>C NMR (c3)

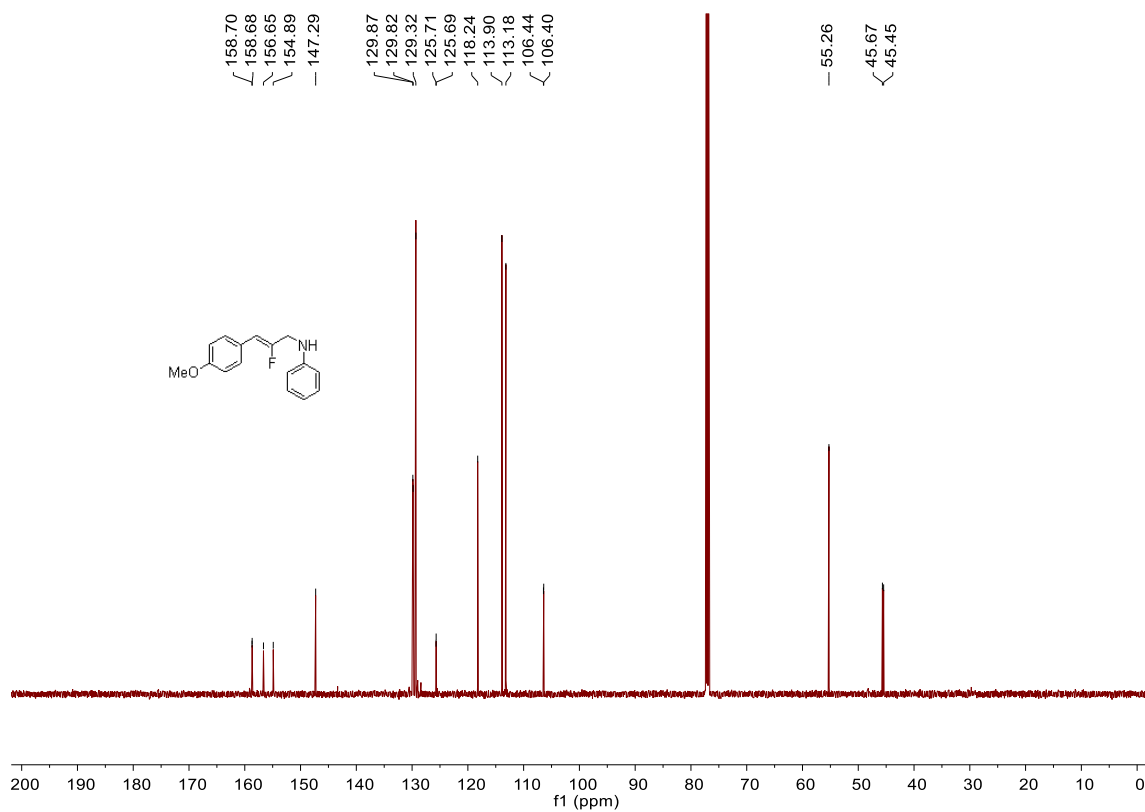

<sup>1</sup>H NMR (c4)

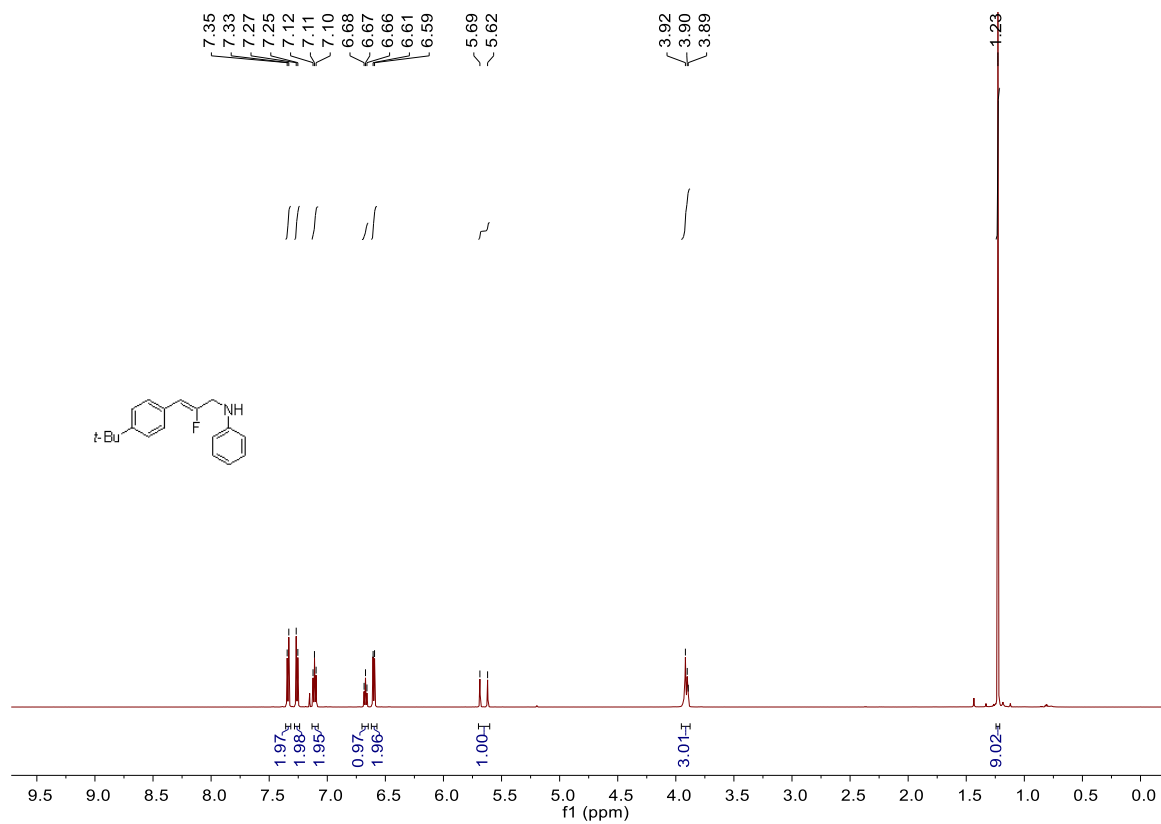

<sup>19</sup>F NMR (c4)

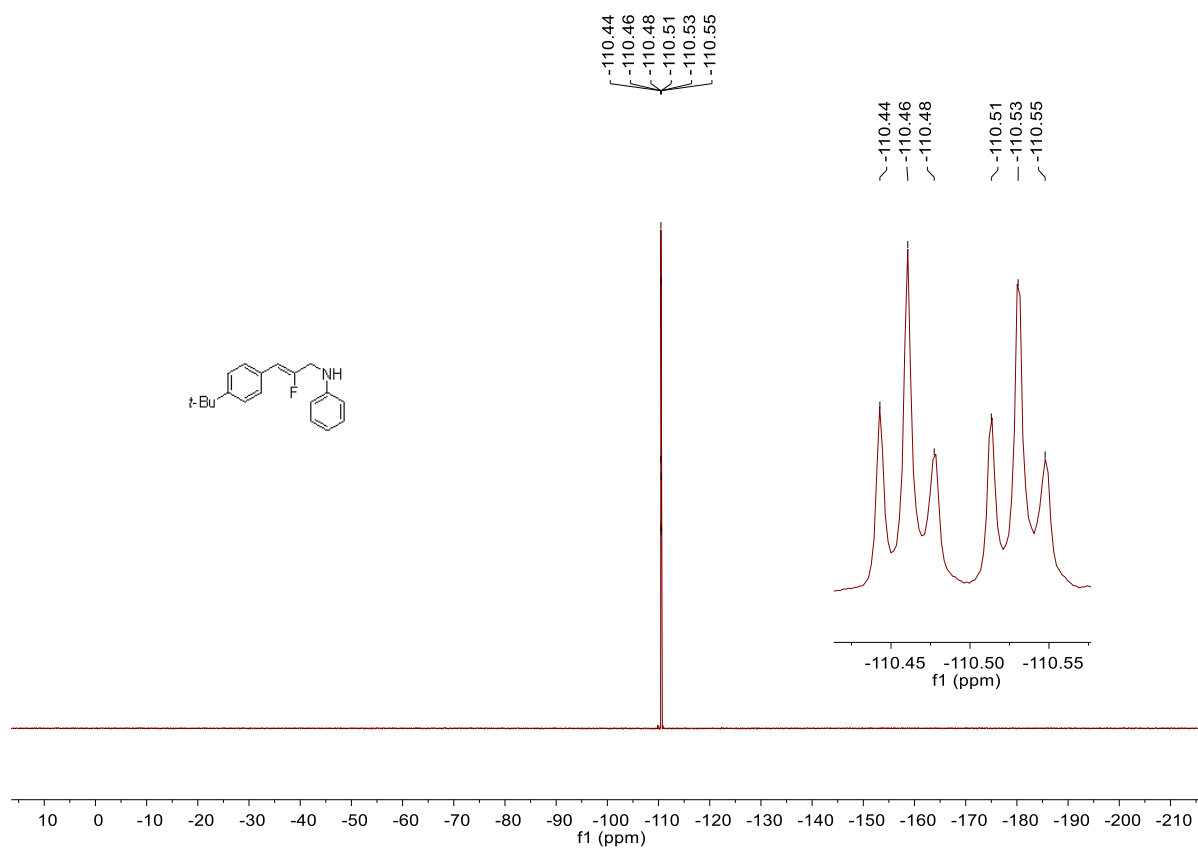

<sup>13</sup>C NMR (c4)

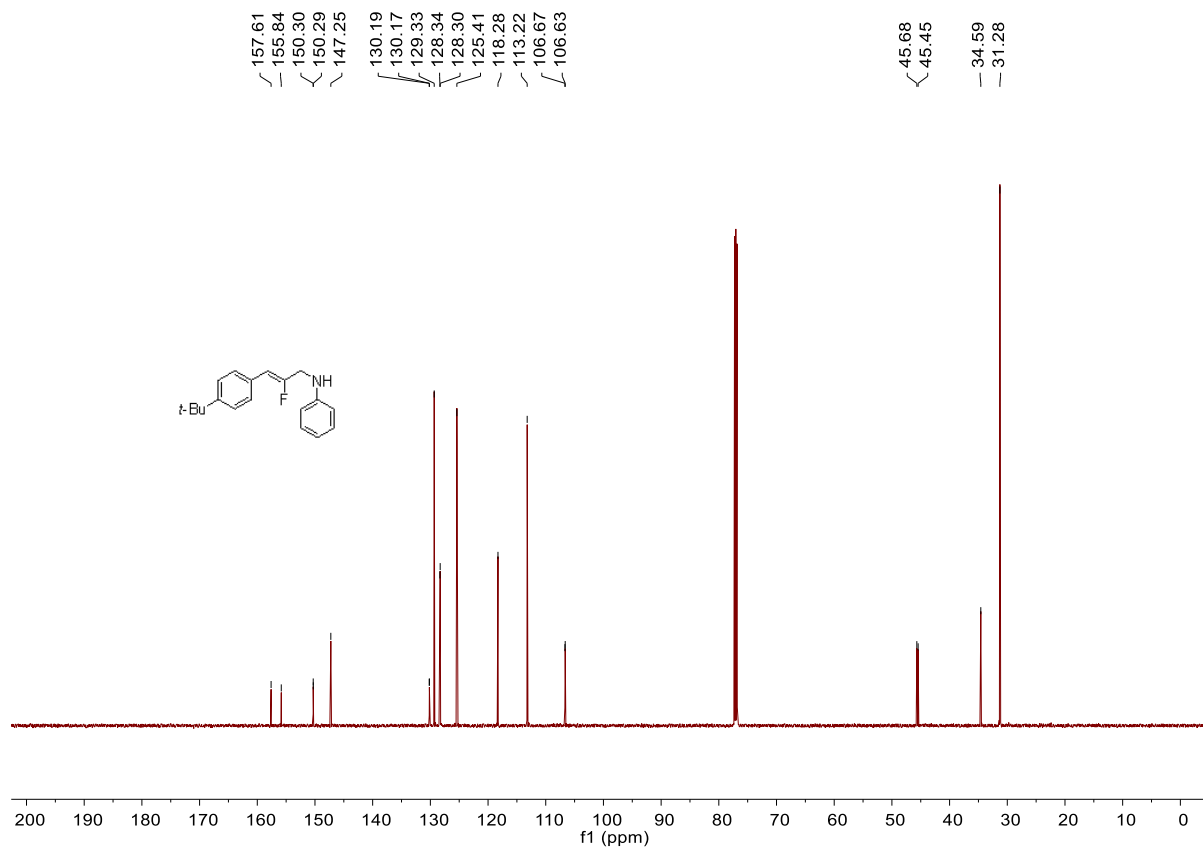



<sup>1</sup>H NMR (c5)

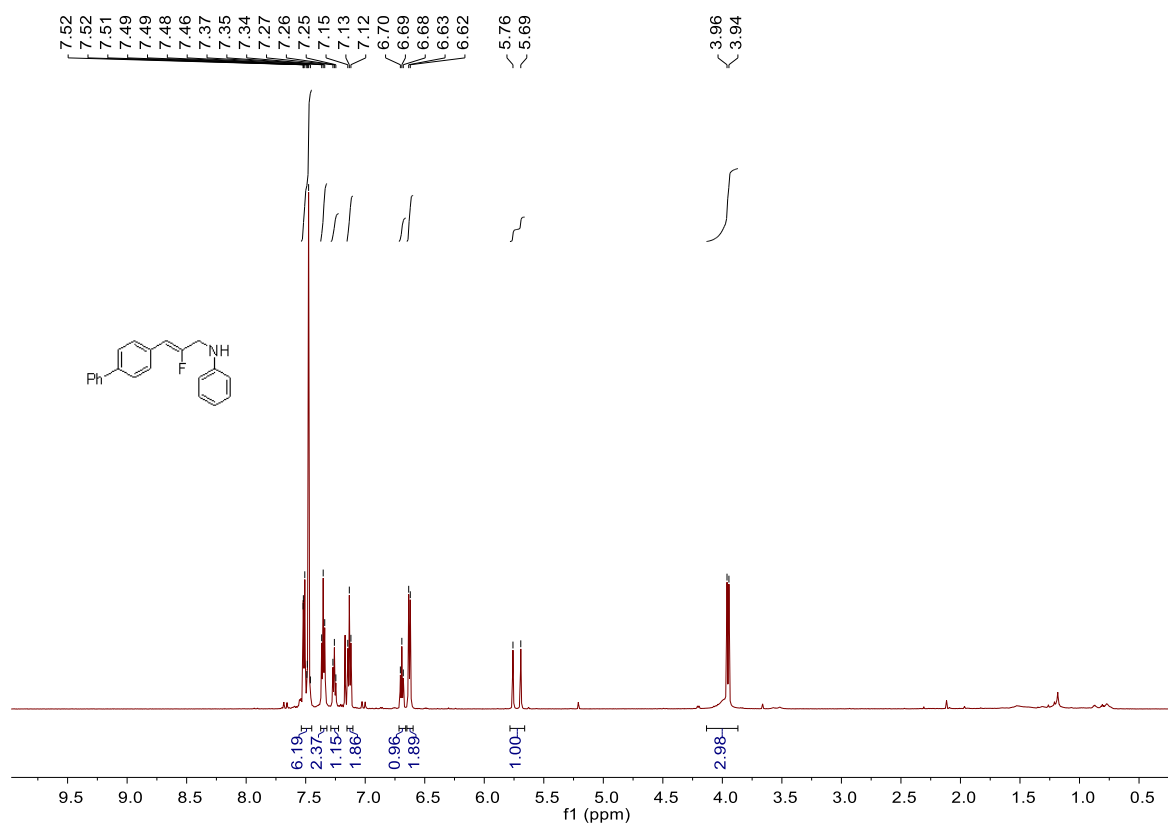

<sup>19</sup>F NMR (c5)

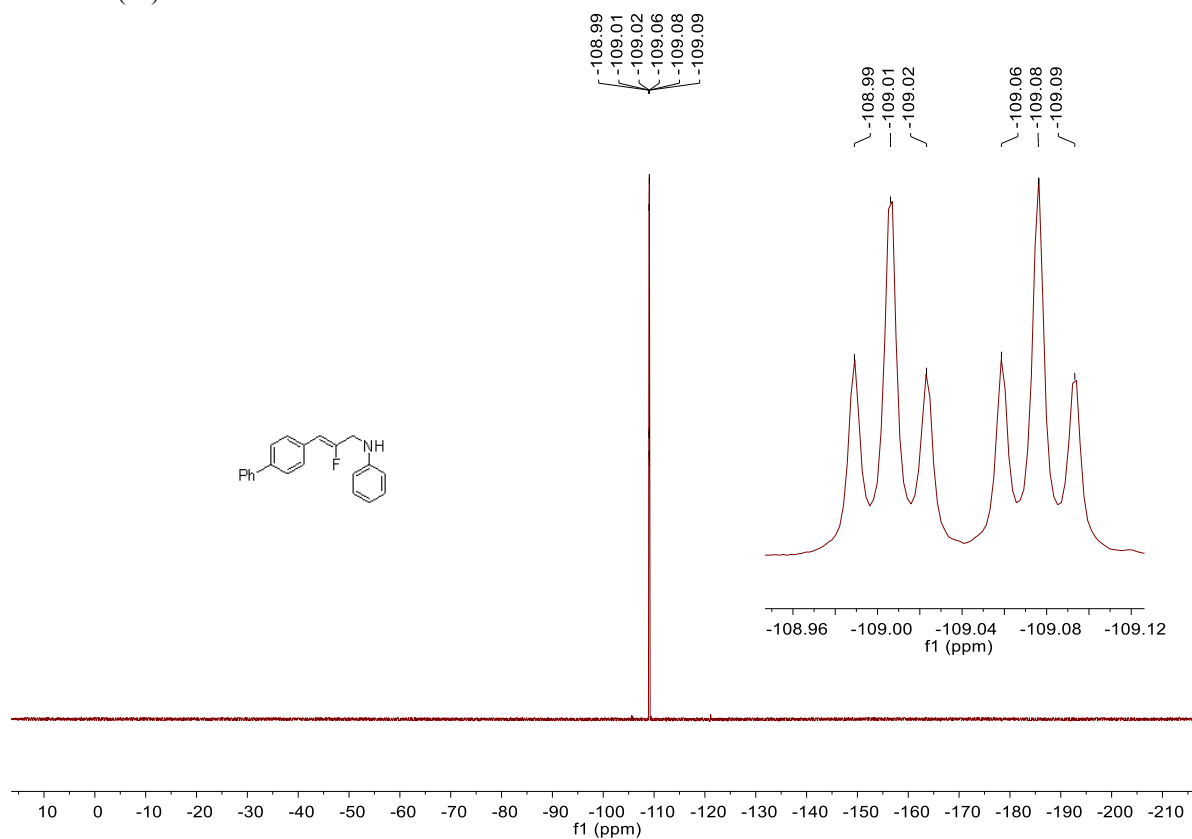

<sup>13</sup>C NMR (c5)

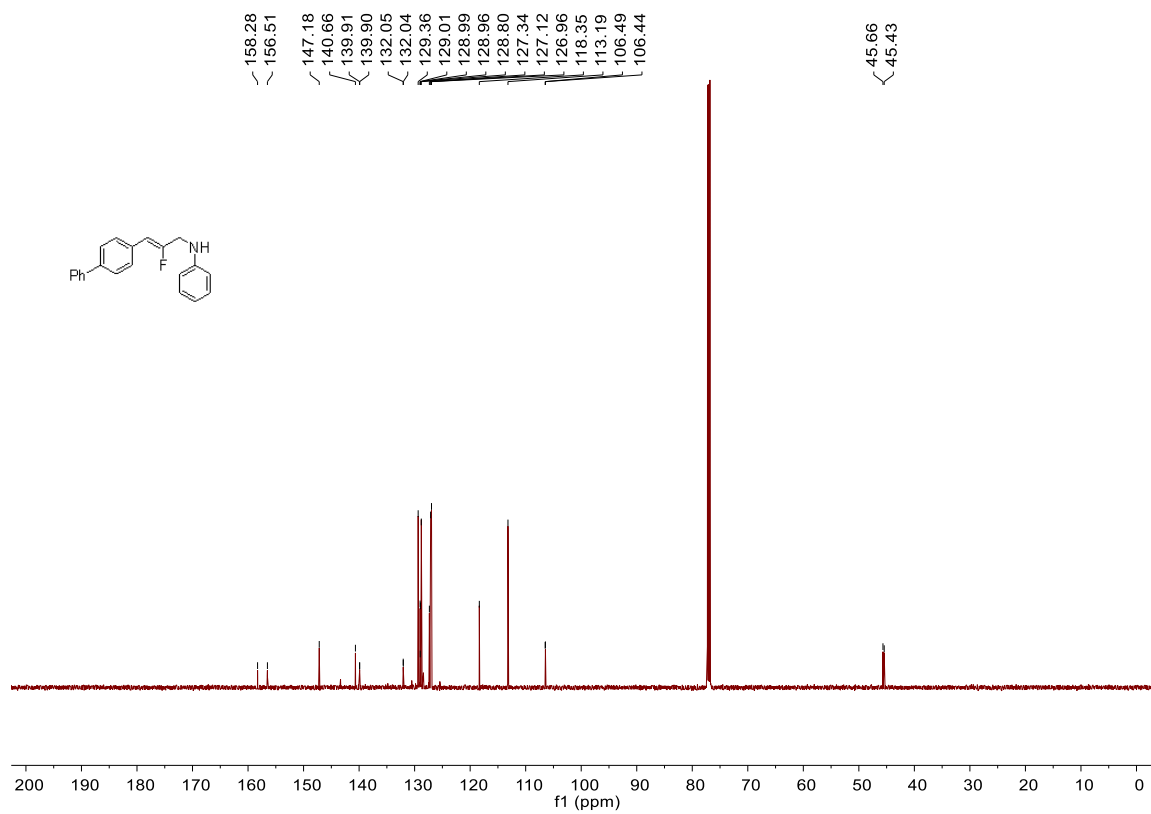

<sup>1</sup>H NMR (c6)

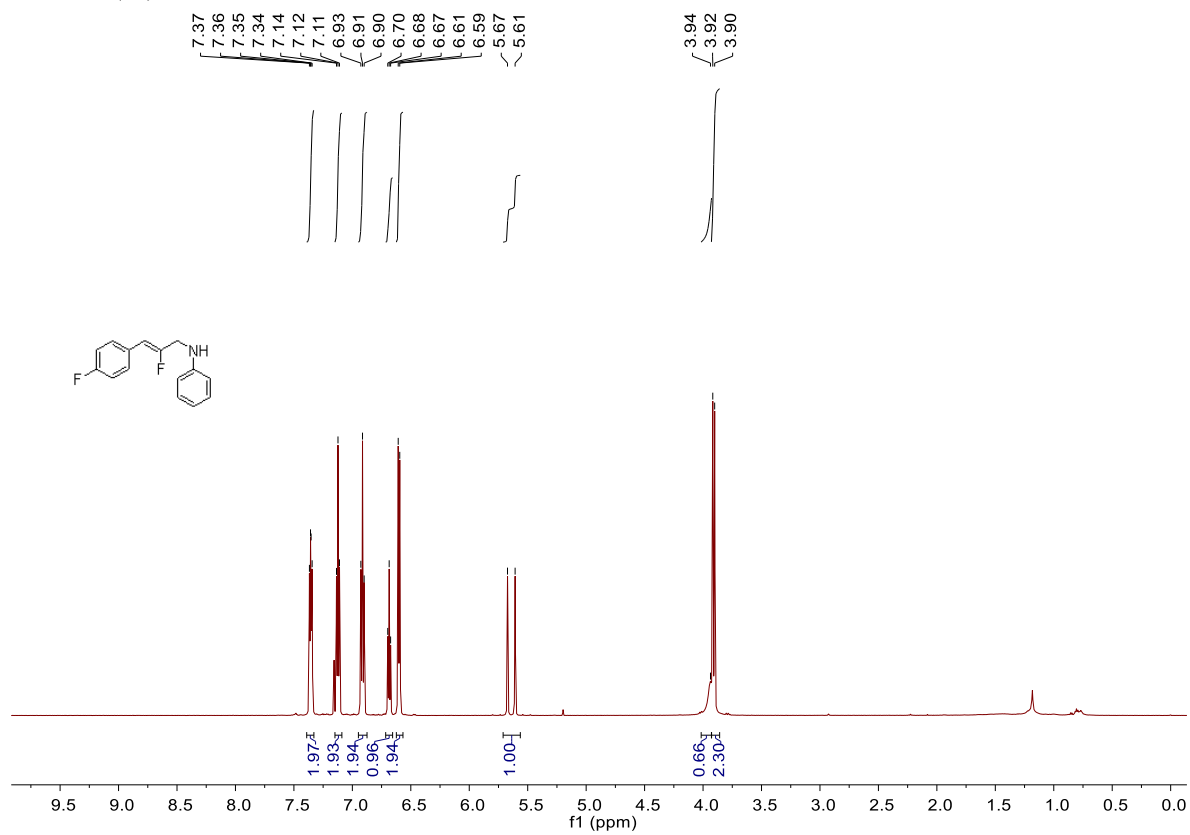

<sup>19</sup>F NMR (c6)

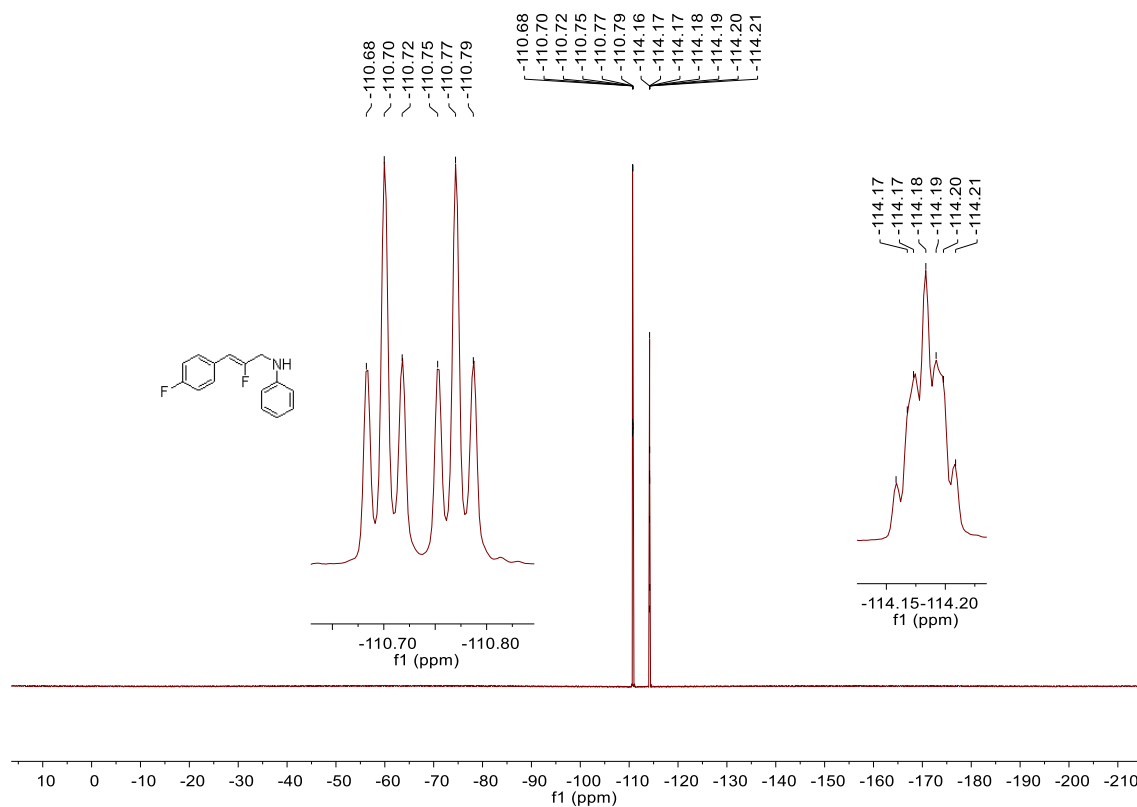

<sup>13</sup>C NMR (c6)

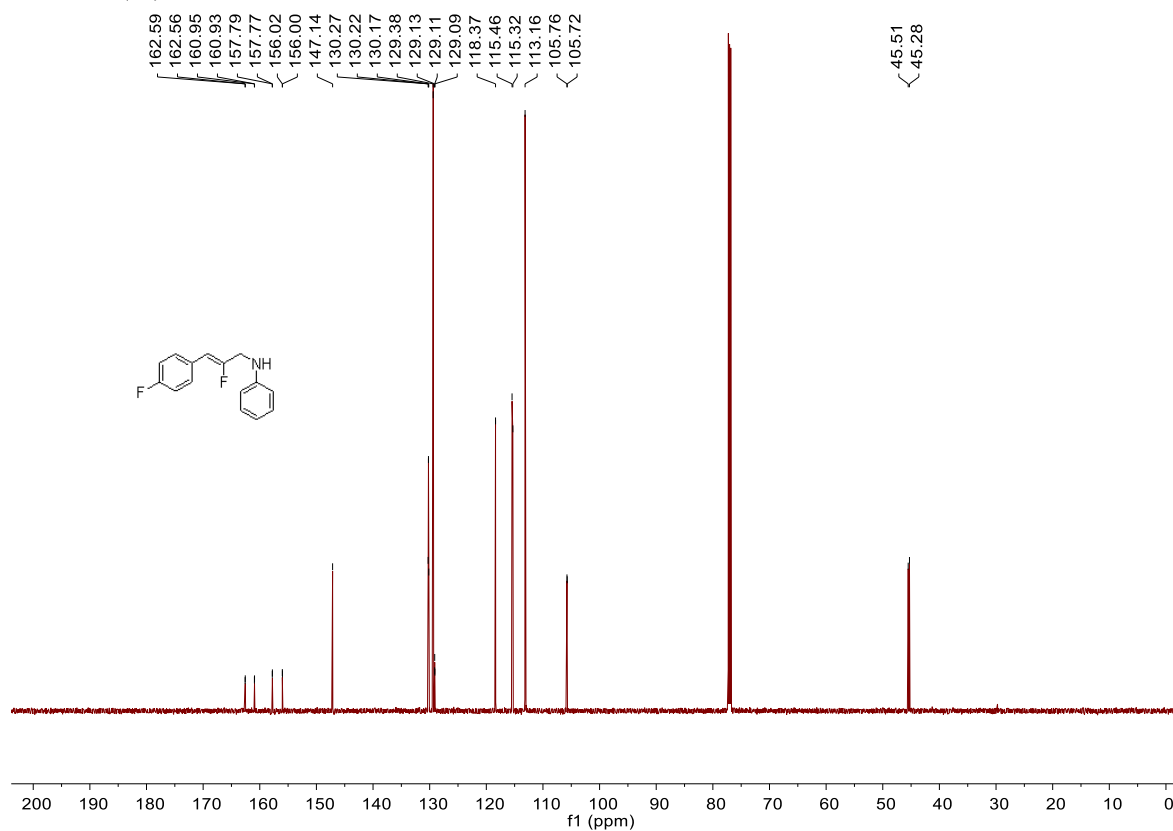

<sup>1</sup>H NMR (c7)

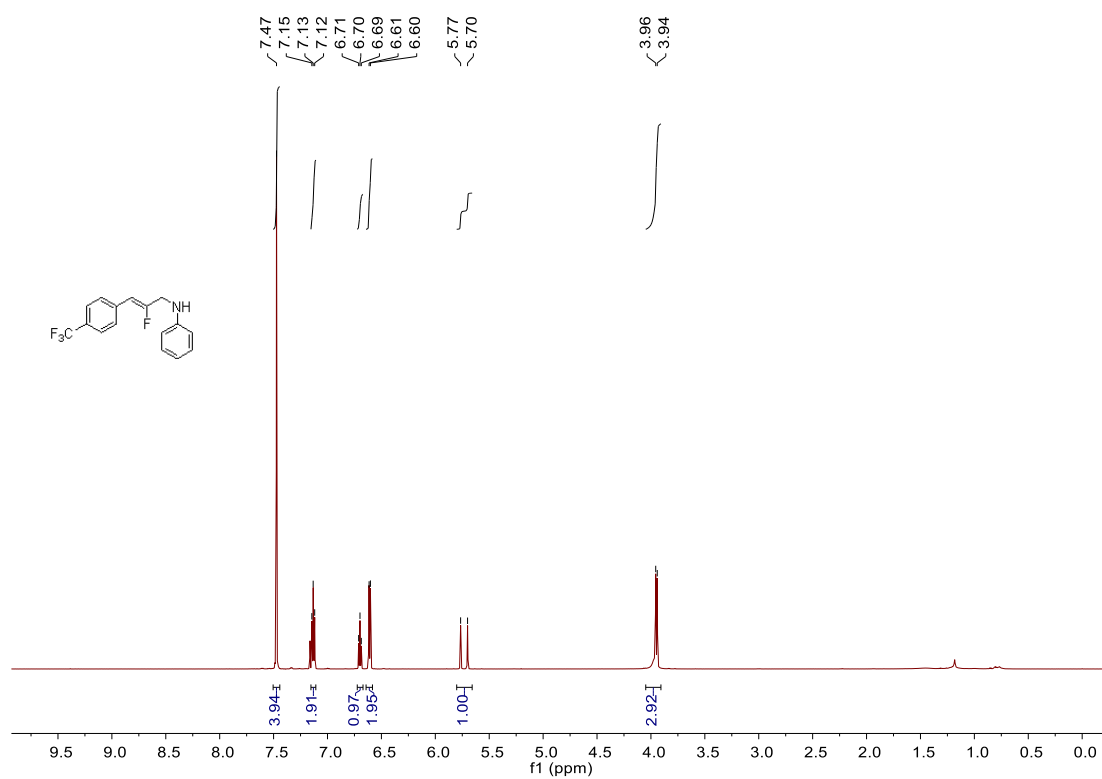

<sup>19</sup>F NMR (c7)

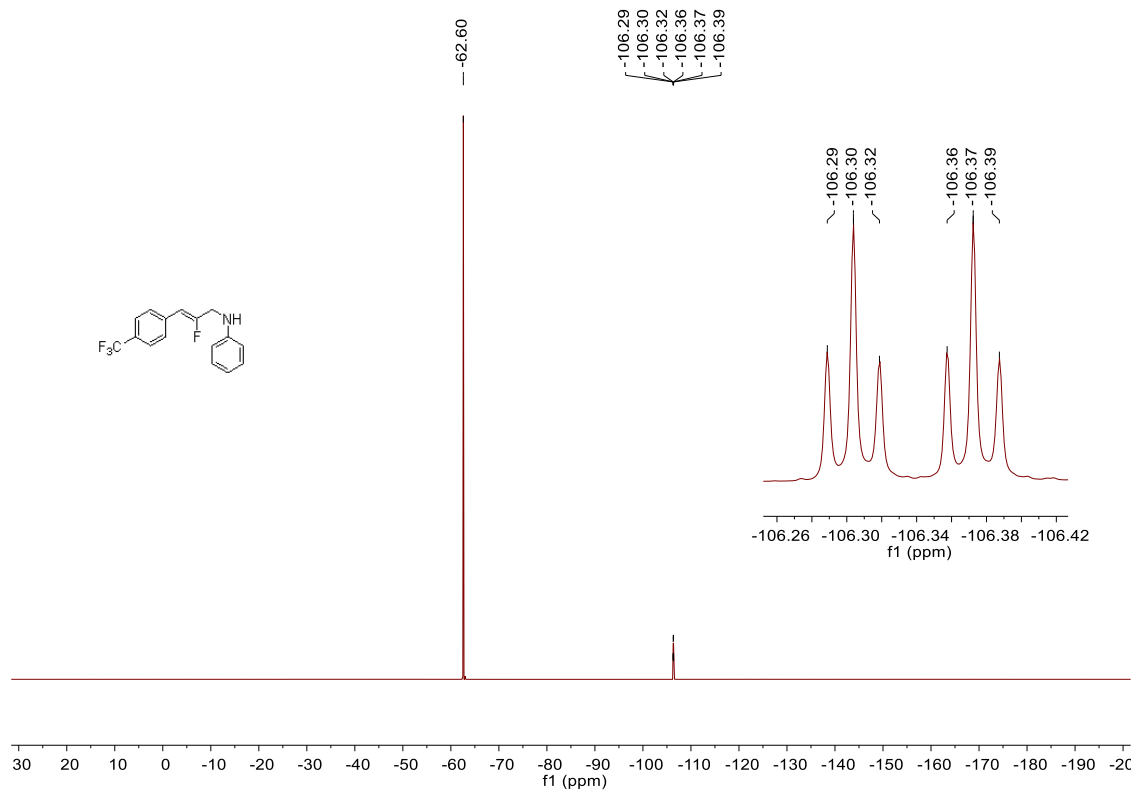

<sup>13</sup>C NMR (c7)

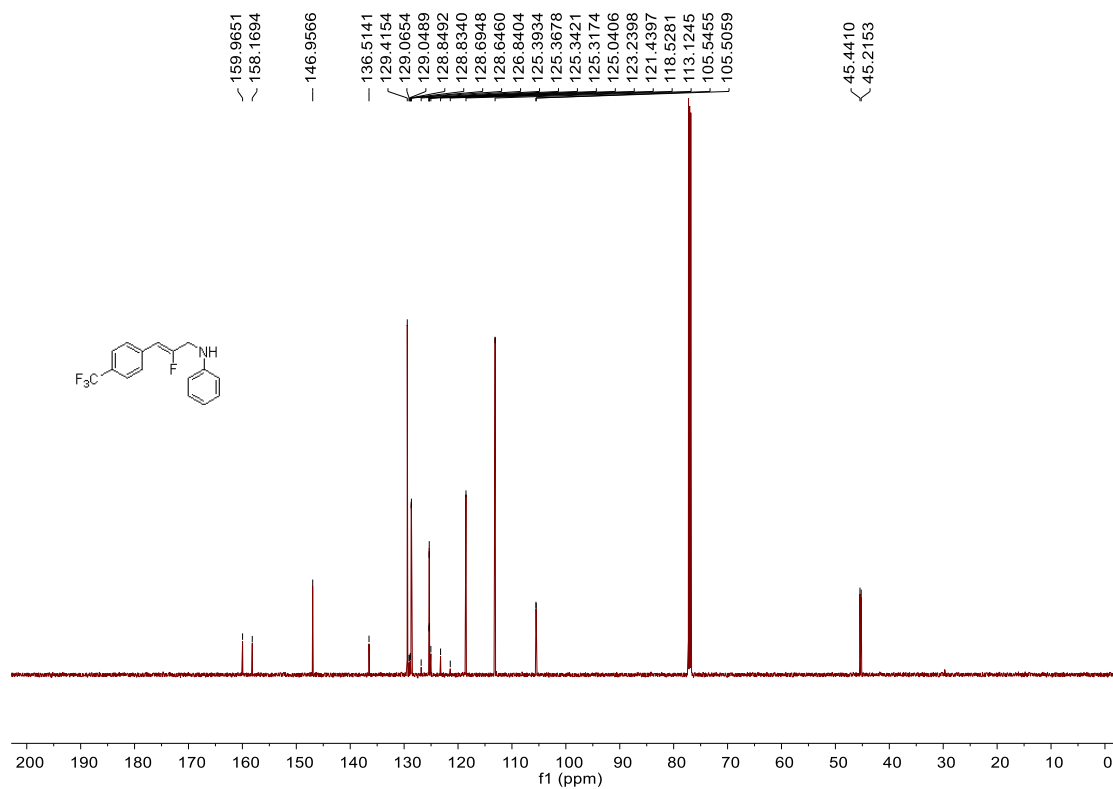

<sup>1</sup>H NMR (c8)

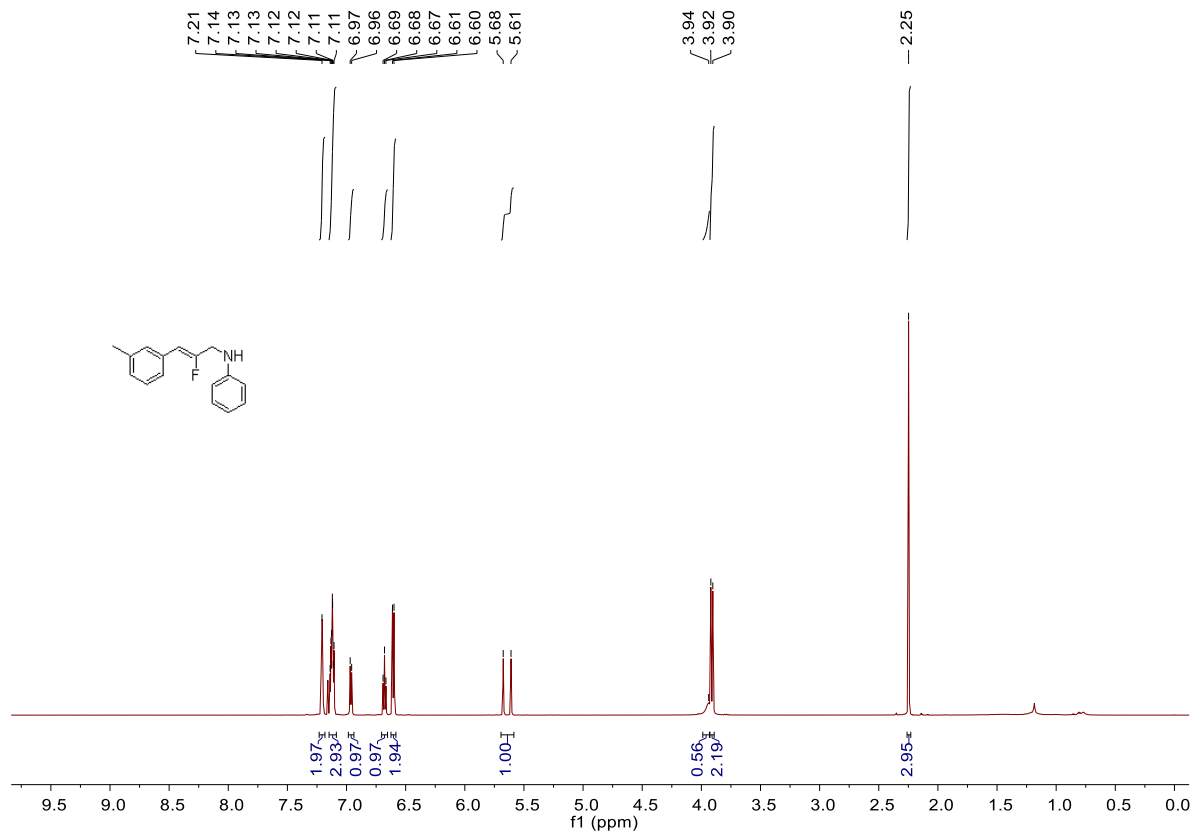

<sup>19</sup>F NMR (c8)

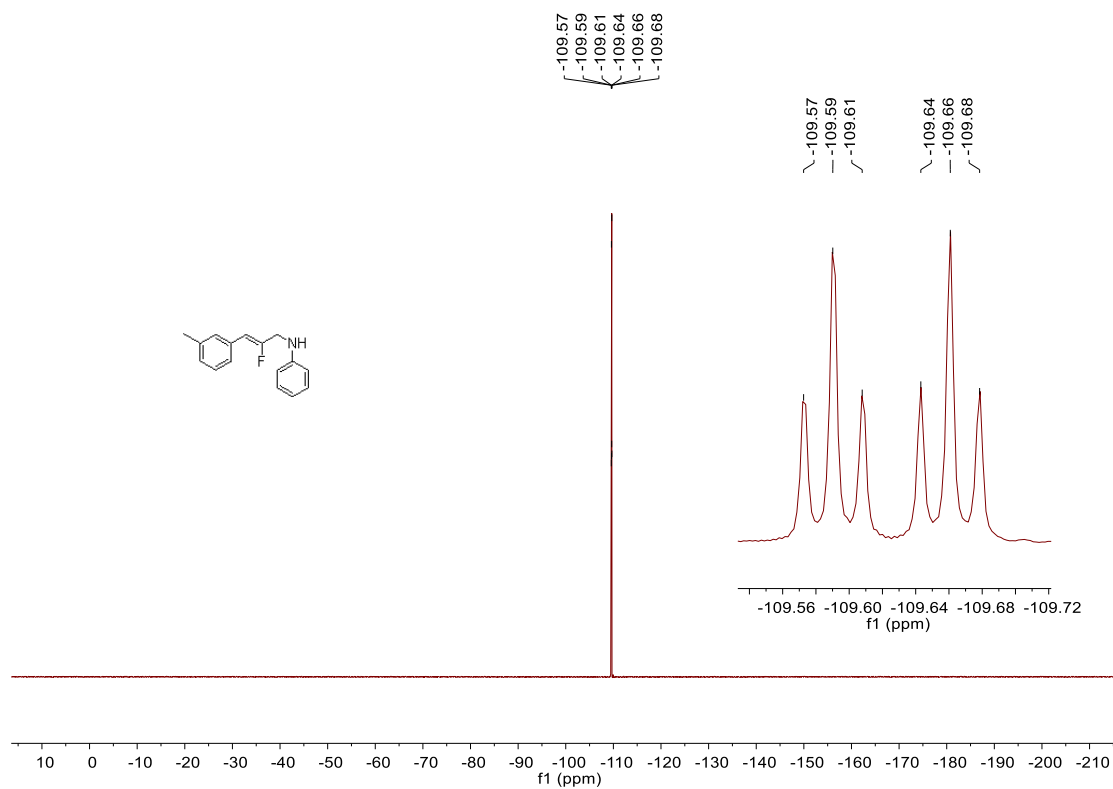

<sup>13</sup>C NMR (c8)

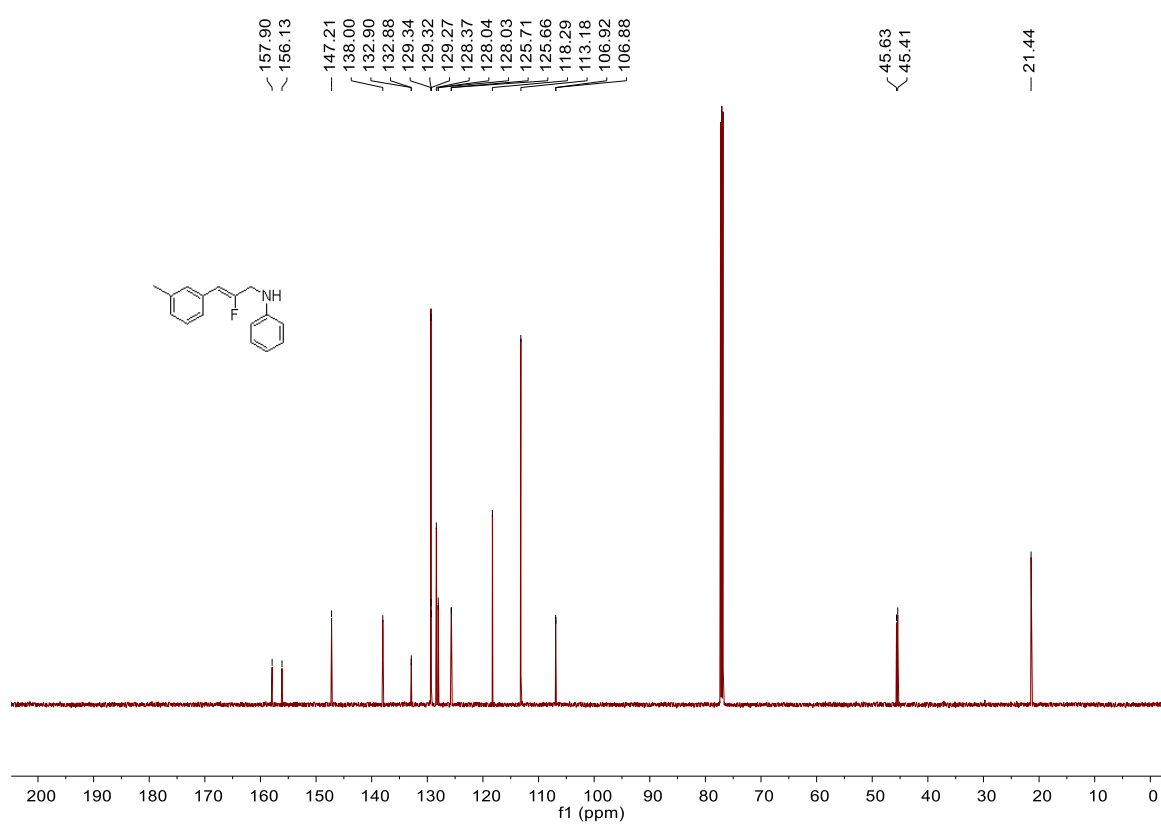

### <sup>1</sup>H NMR (c9)

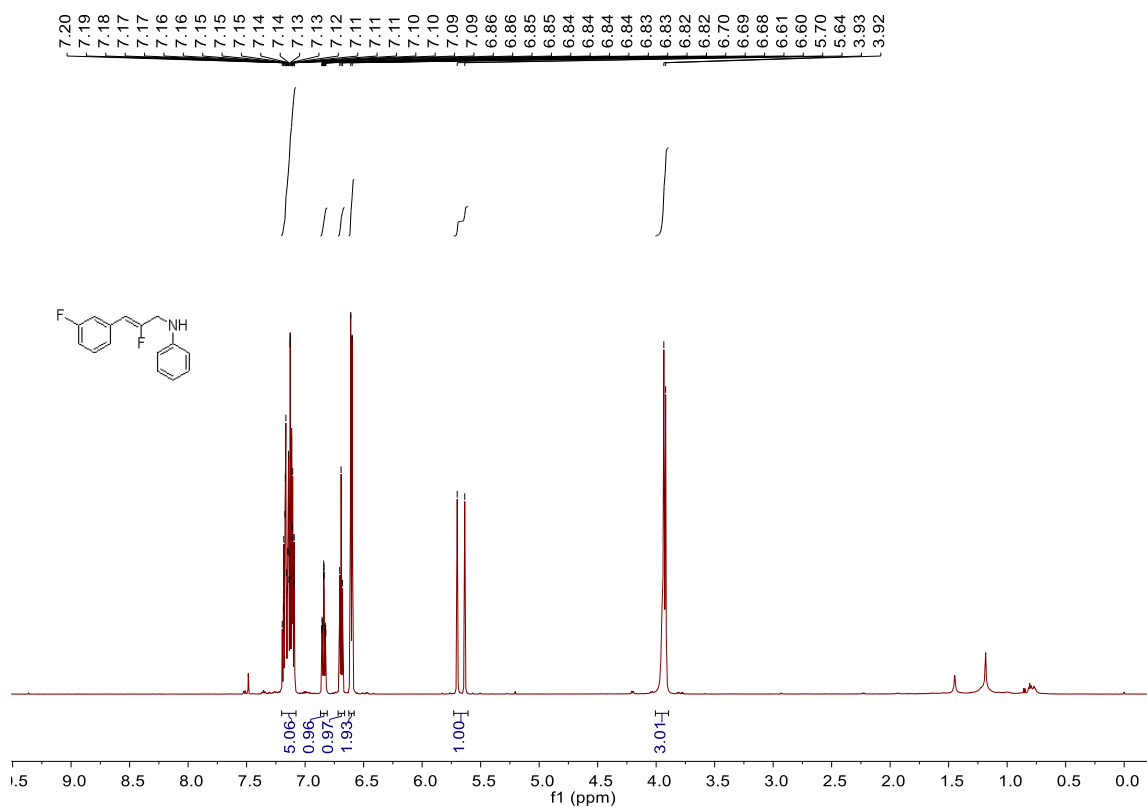

### <sup>19</sup>F NMR (c9)

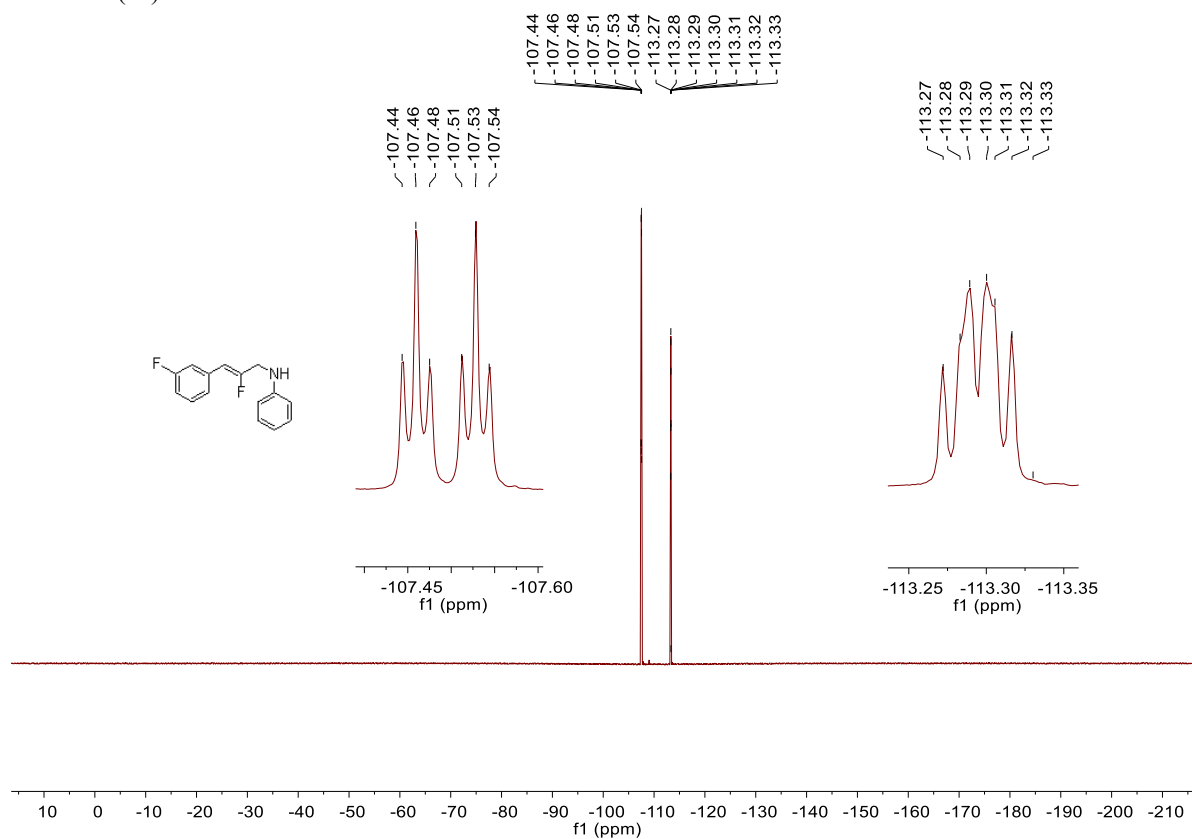

<sup>13</sup>C NMR (c9)

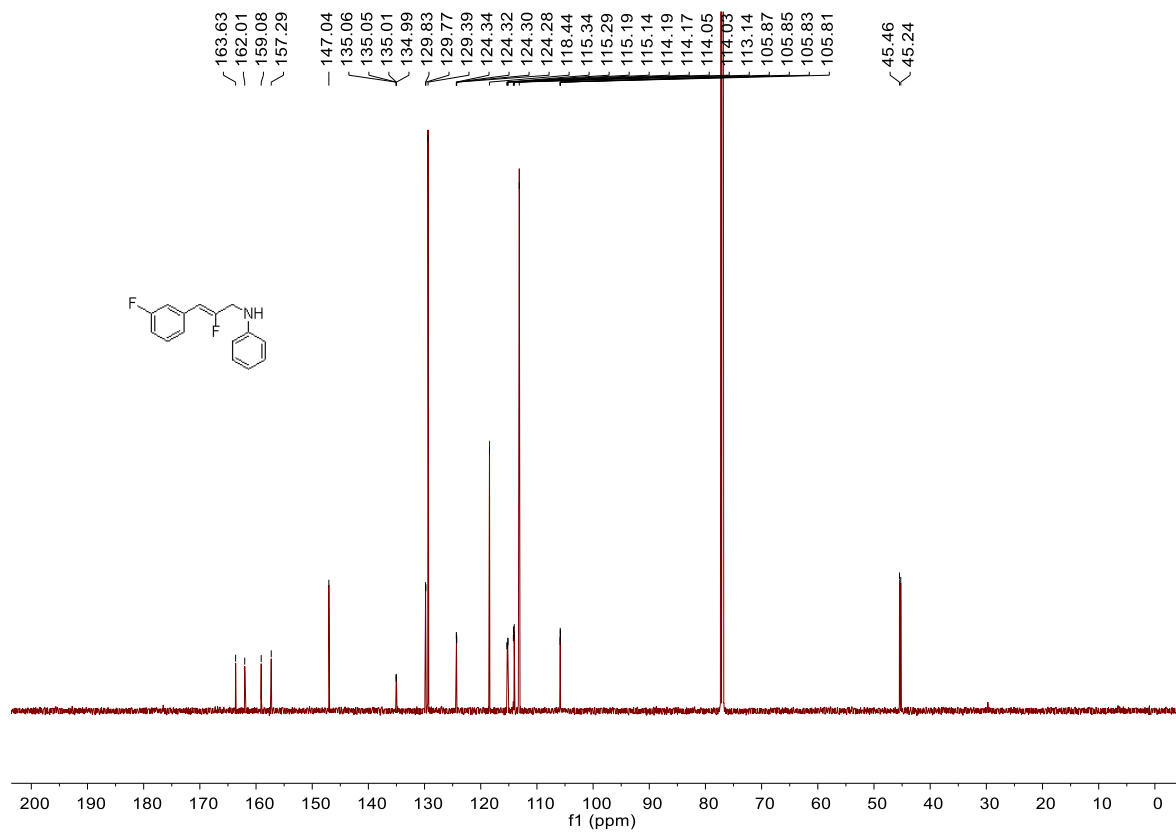

<sup>1</sup>H NMR (c10)

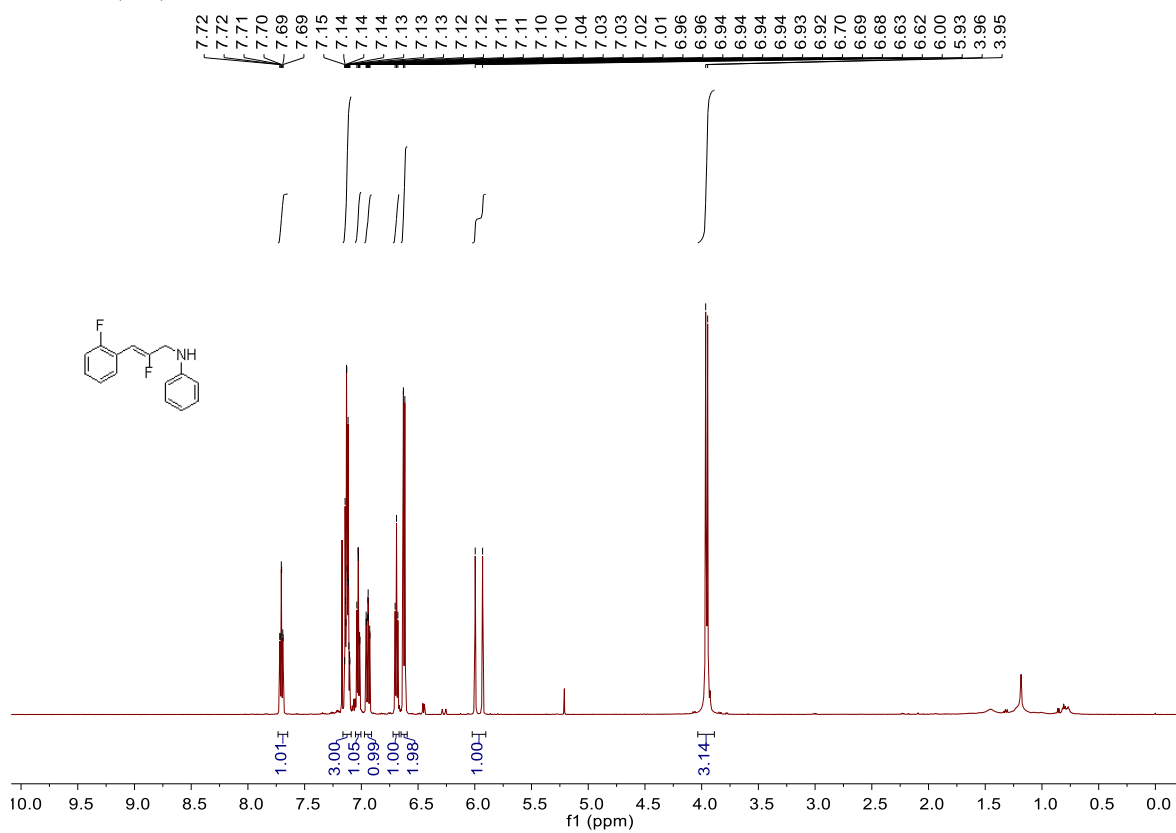



<sup>19</sup>F NMR (c10)

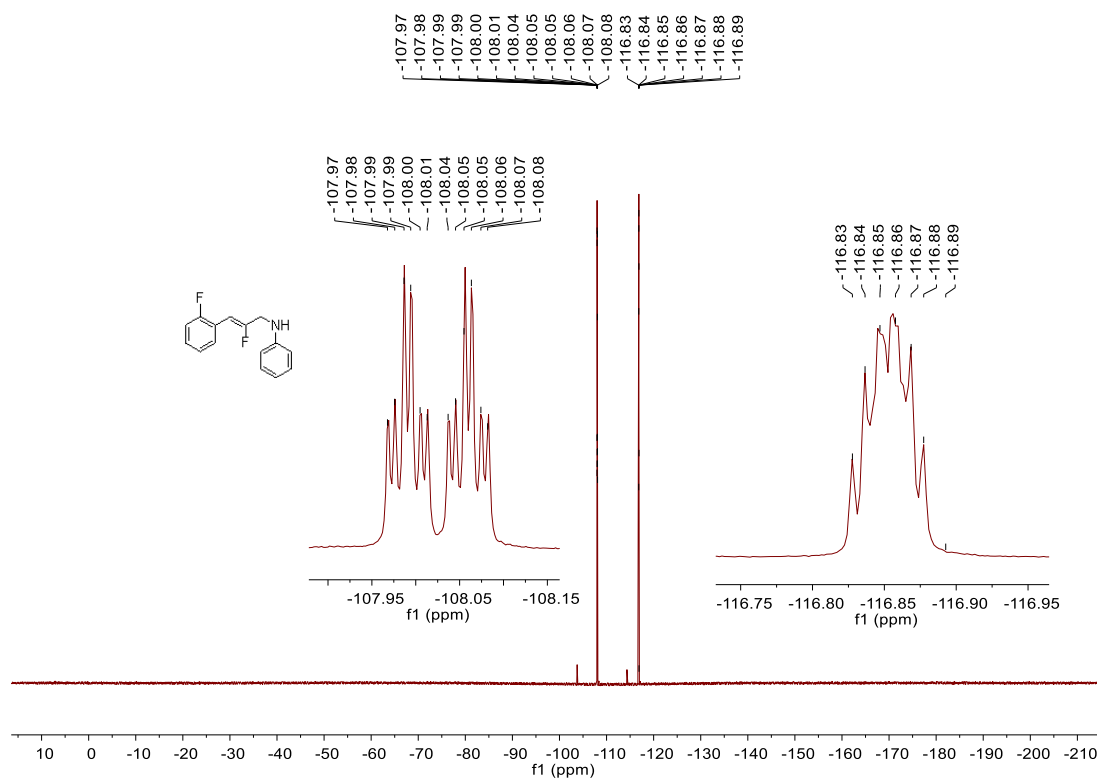

<sup>13</sup>C NMR (c10)

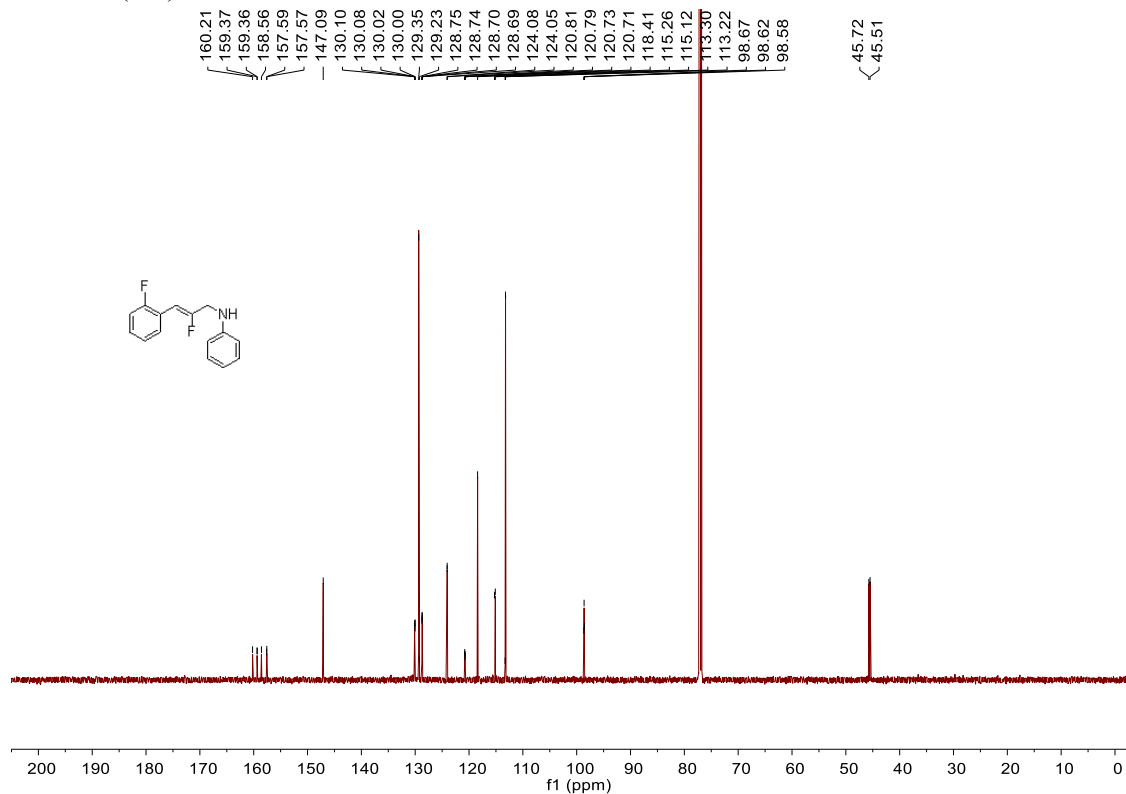

<sup>1</sup>H NMR (c11)

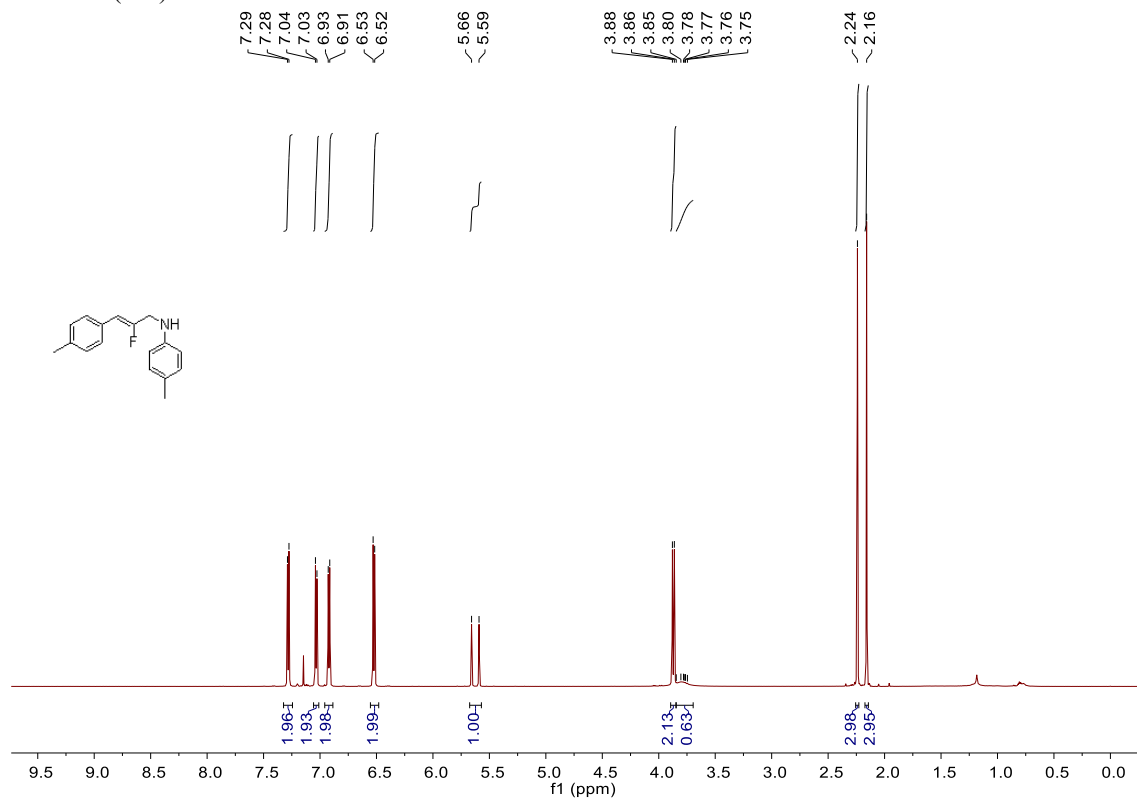

<sup>19</sup>F NMR (c11)

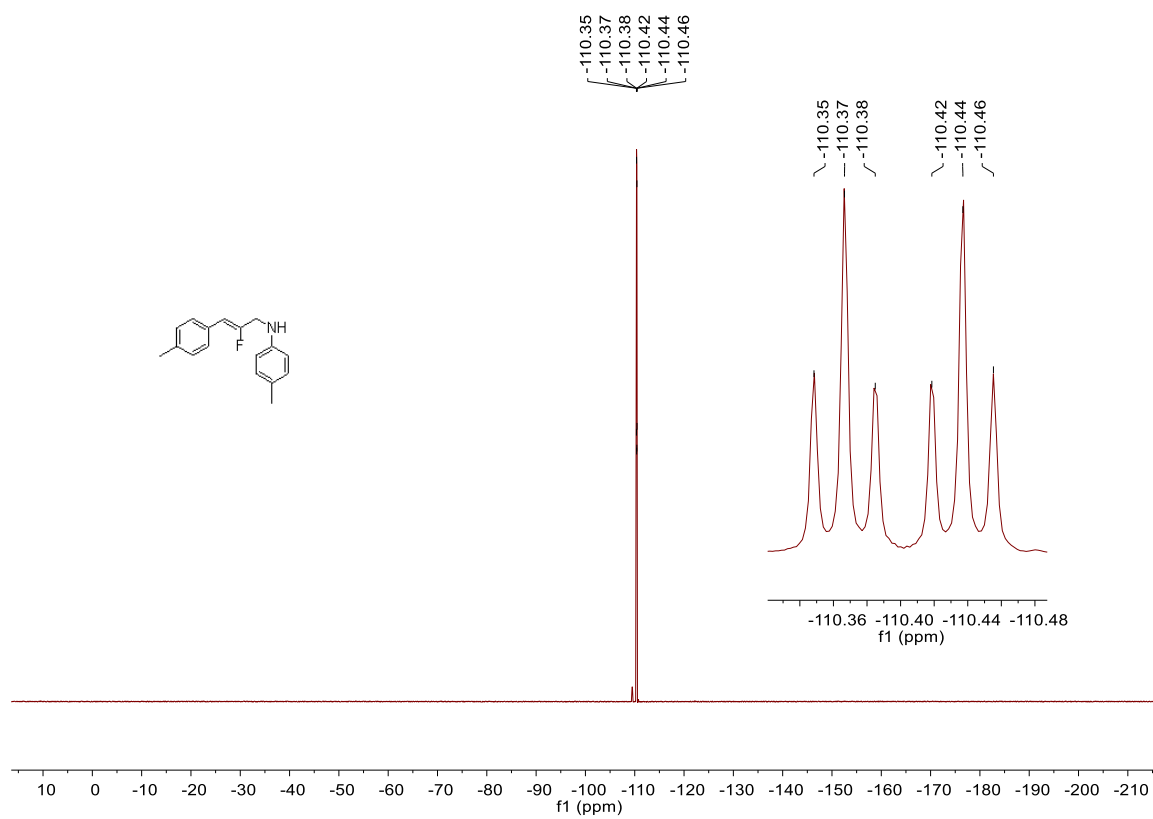

<sup>13</sup>C NMR (c11)

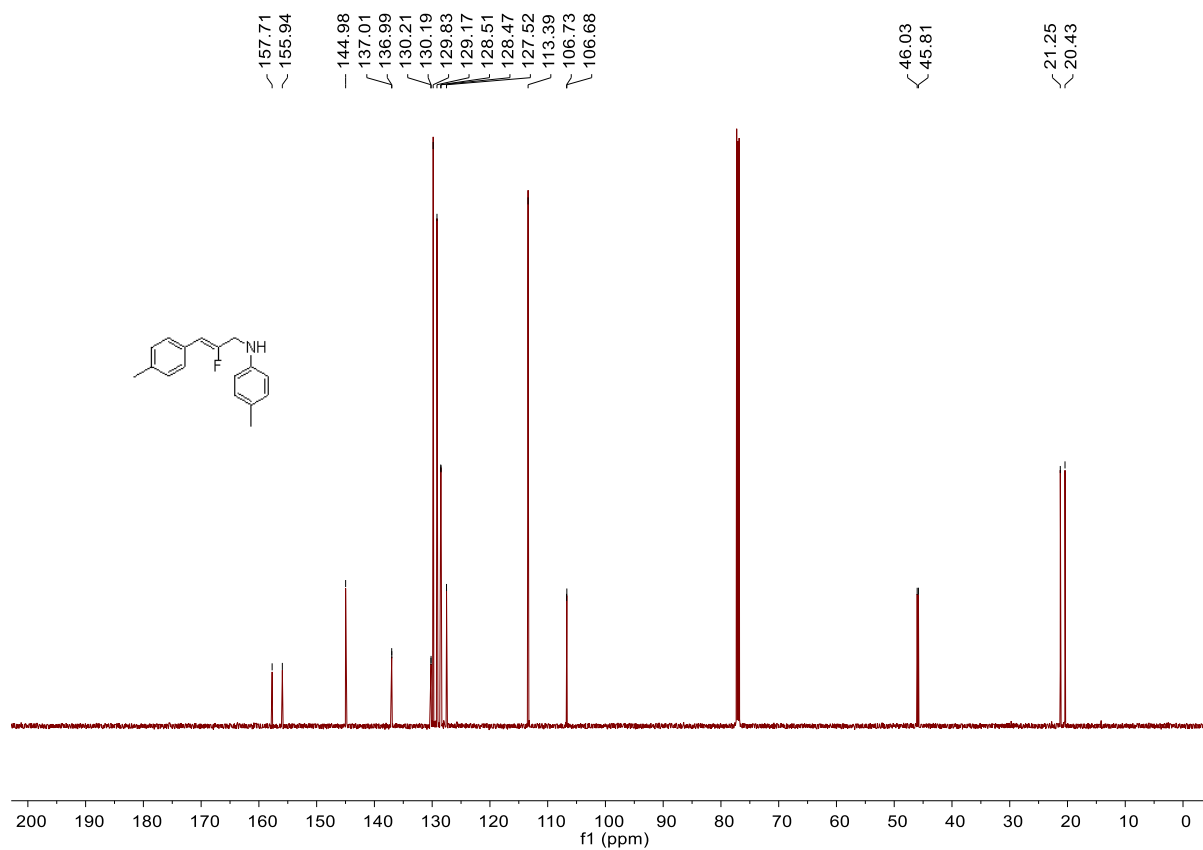

<sup>1</sup>H NMR (c12)

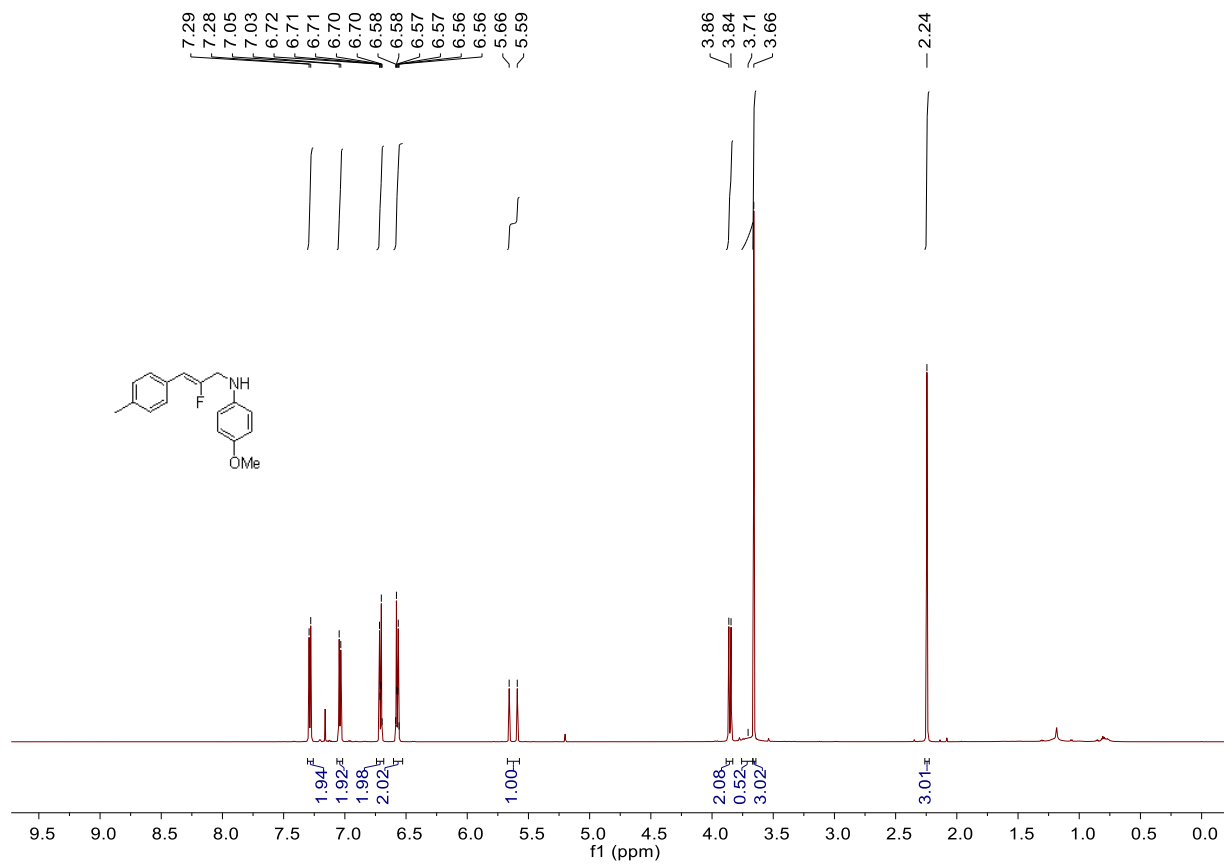

<sup>19</sup>F NMR (c12)

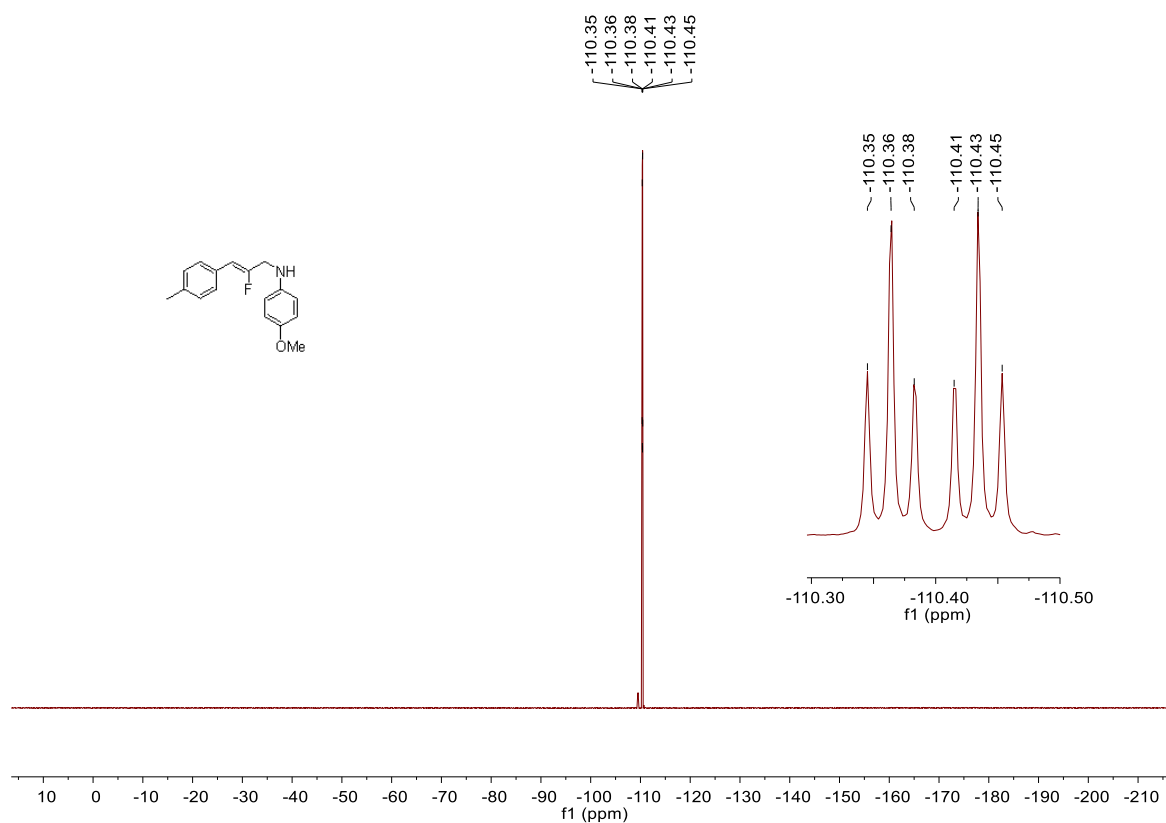

<sup>13</sup>C NMR (c12)

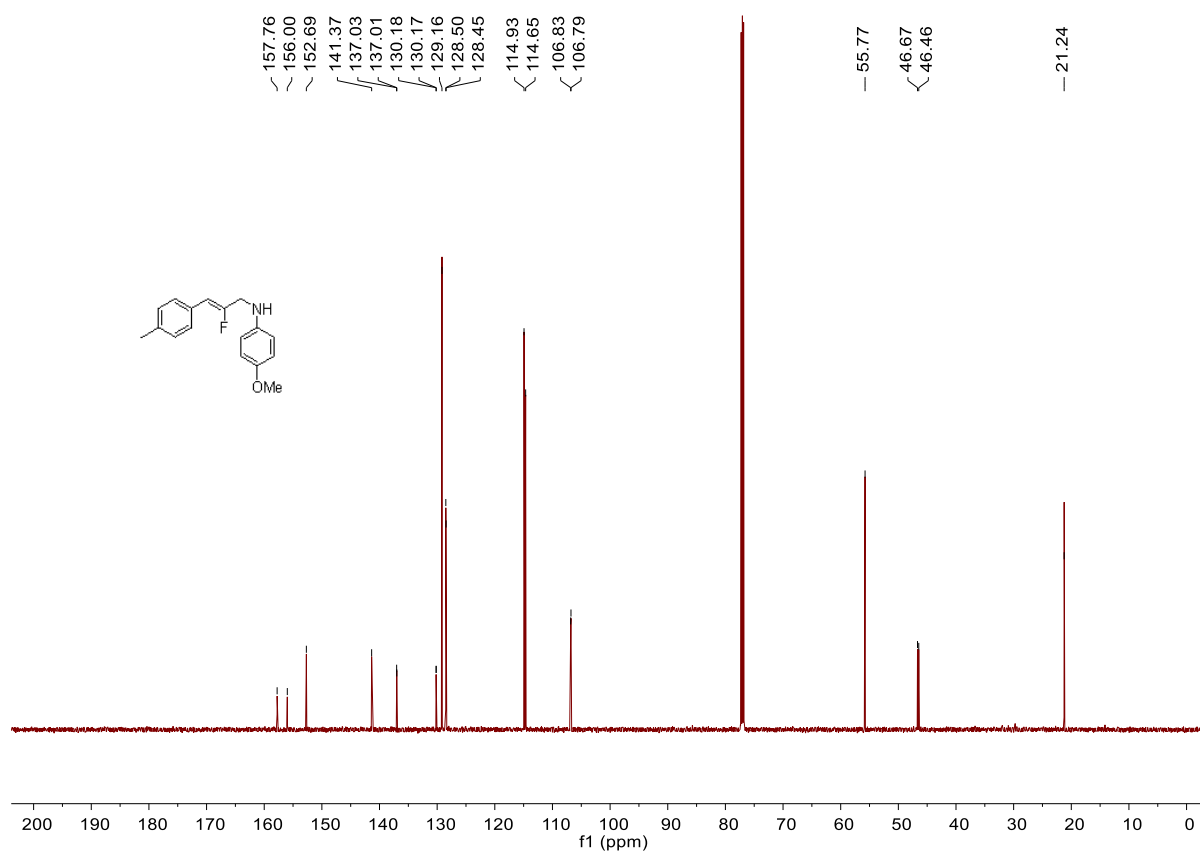

<sup>1</sup>H NMR (c13)

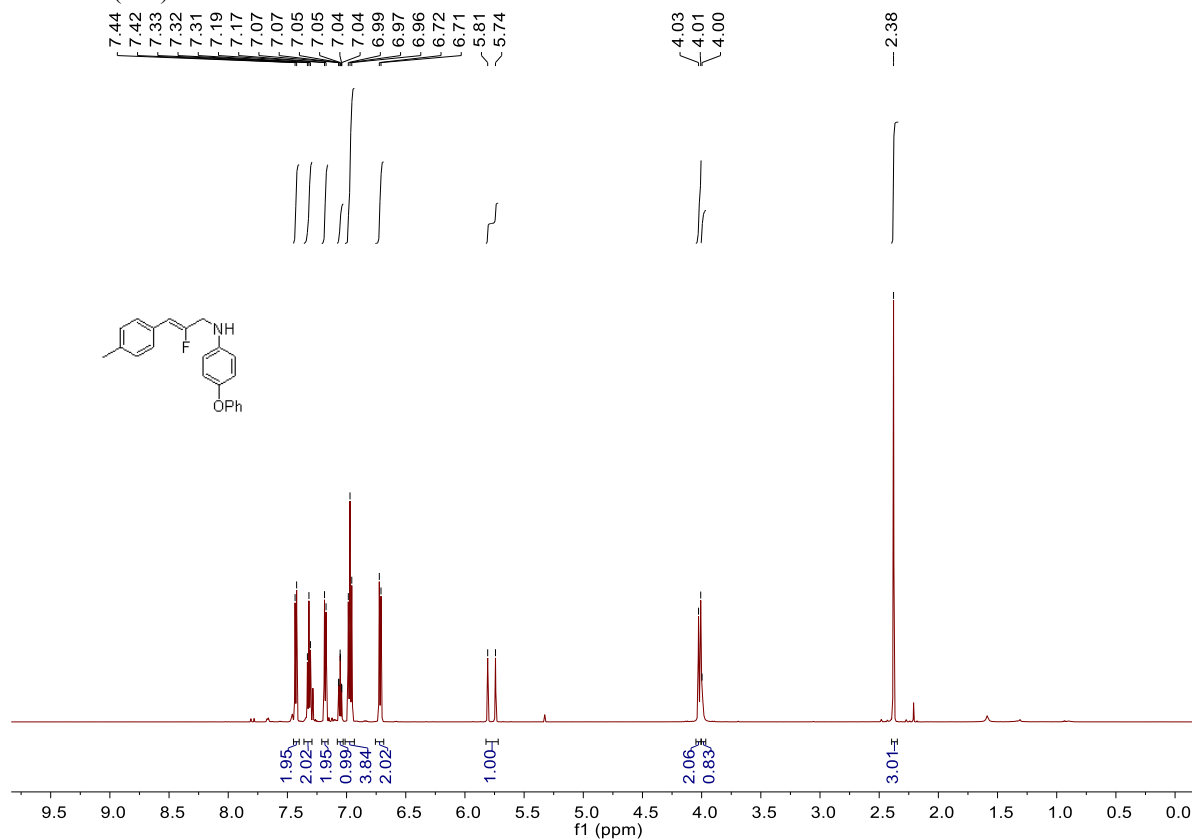

<sup>19</sup>F NMR (c13)

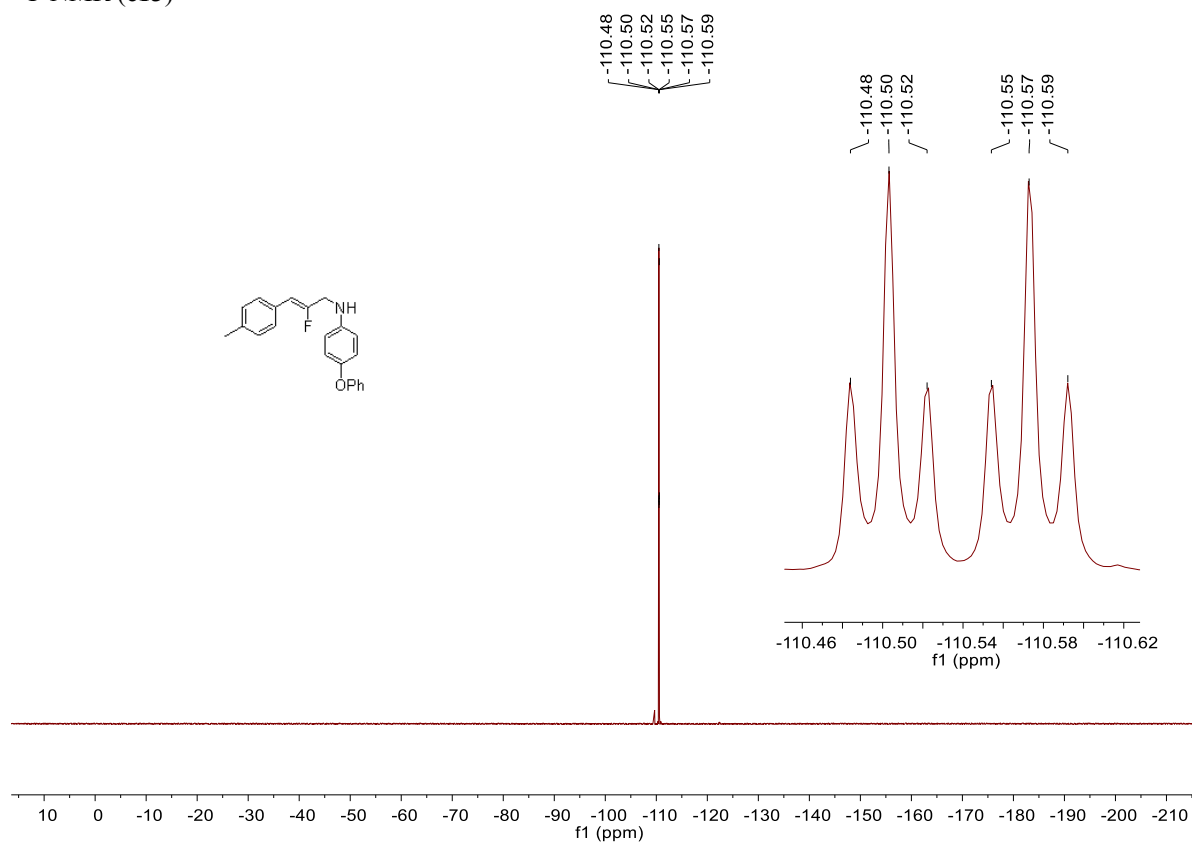

<sup>13</sup>C NMR (c13)

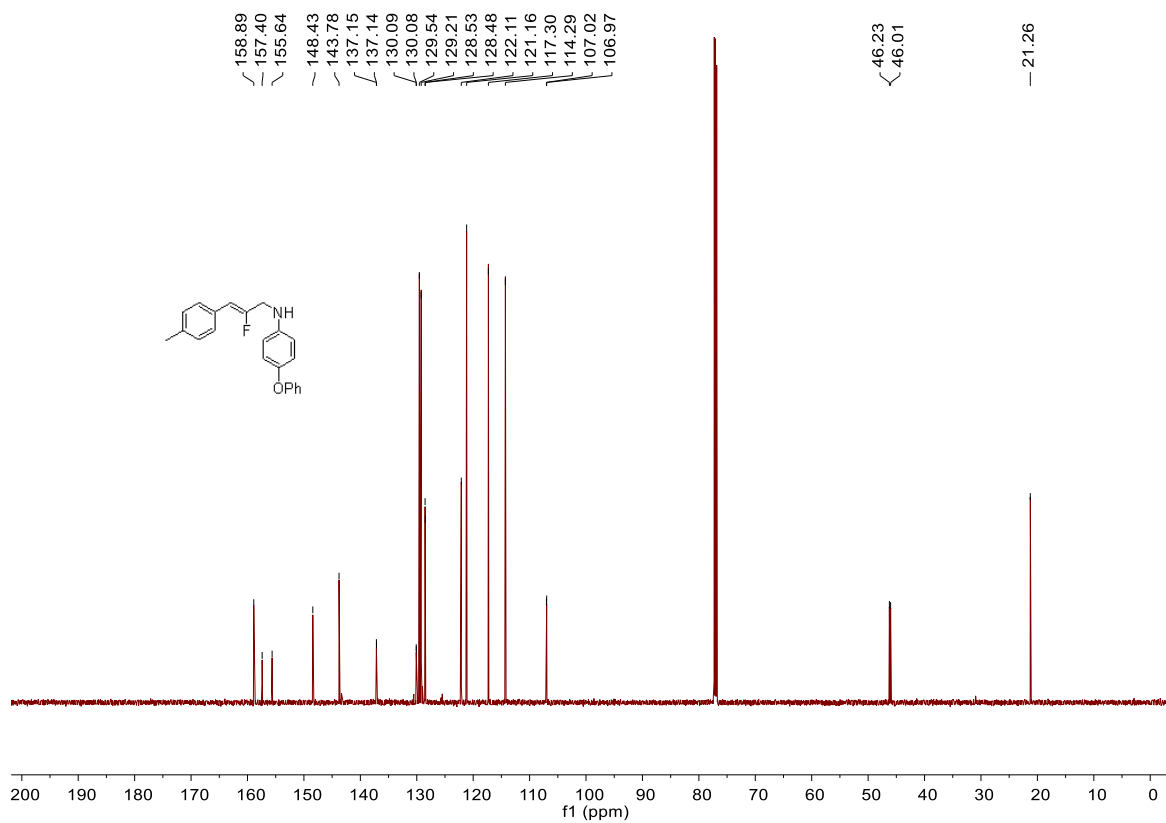

<sup>1</sup>H NMR (c14)

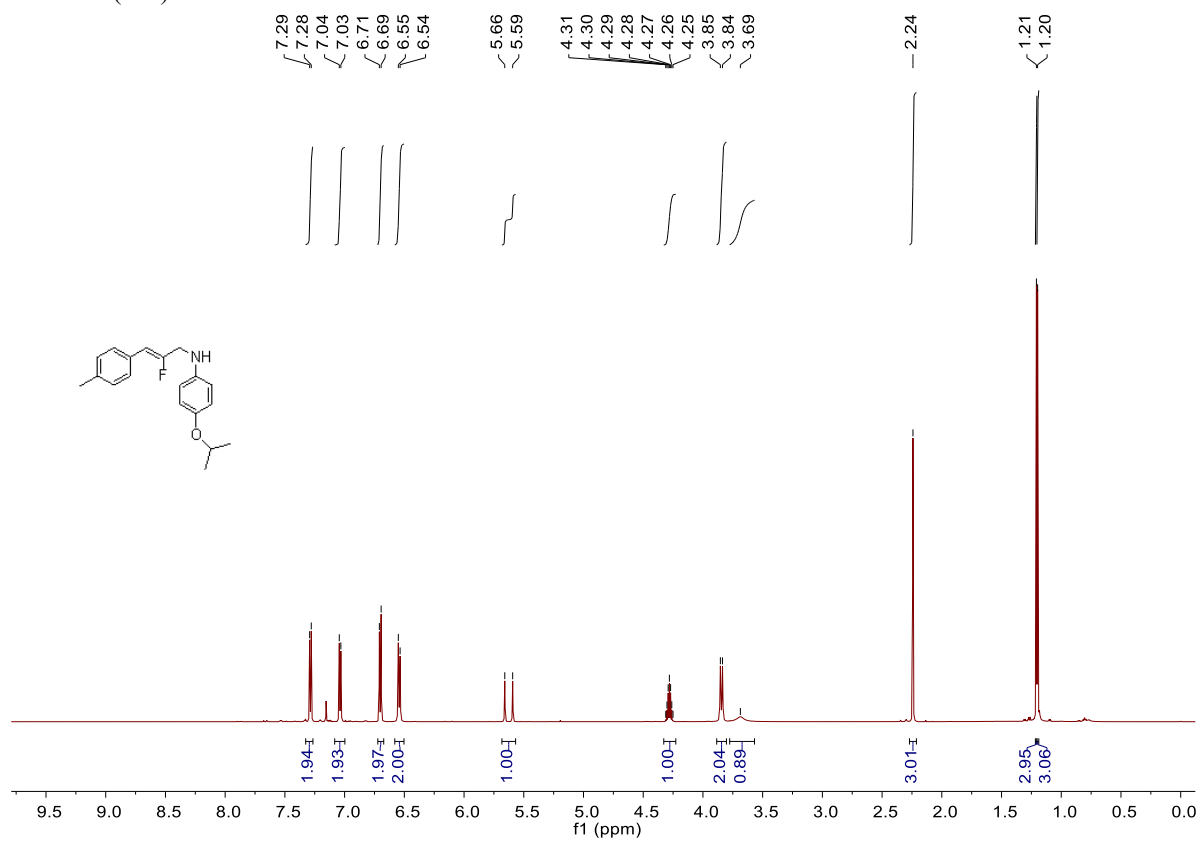

<sup>19</sup>F NMR (c14)

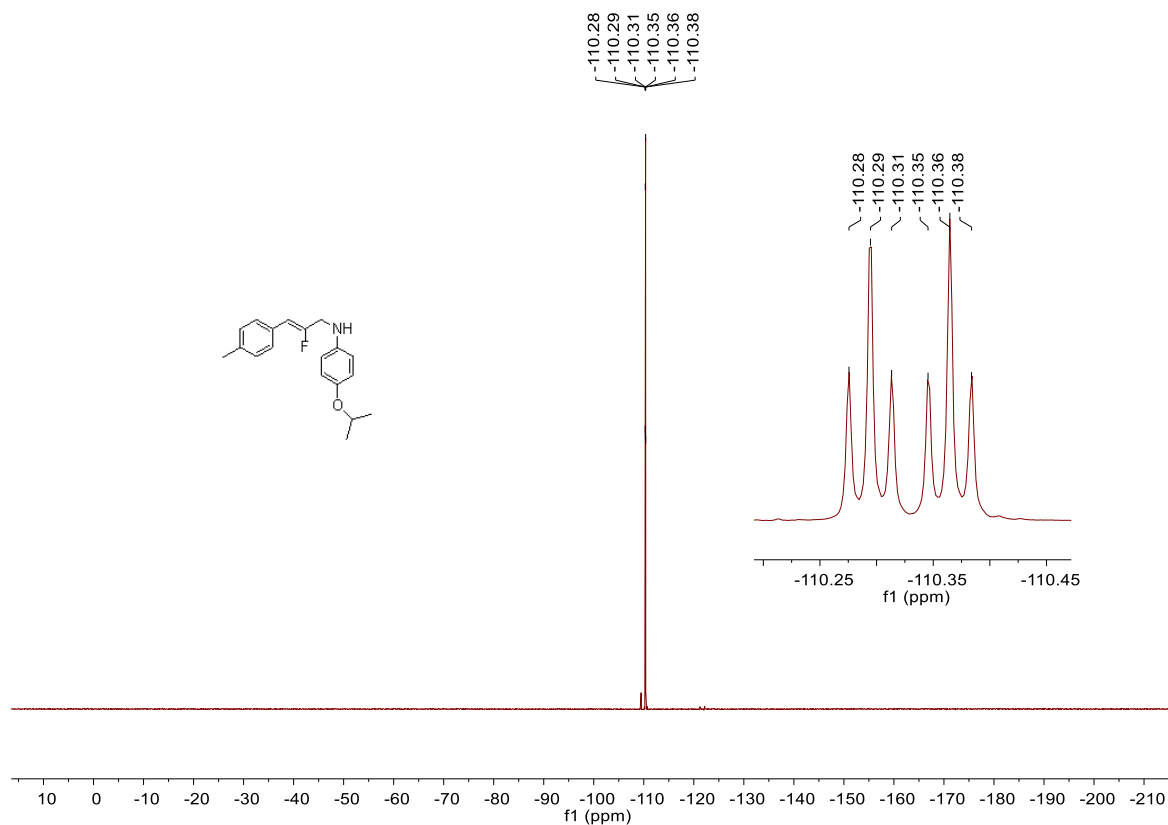

<sup>13</sup>C NMR (c14)

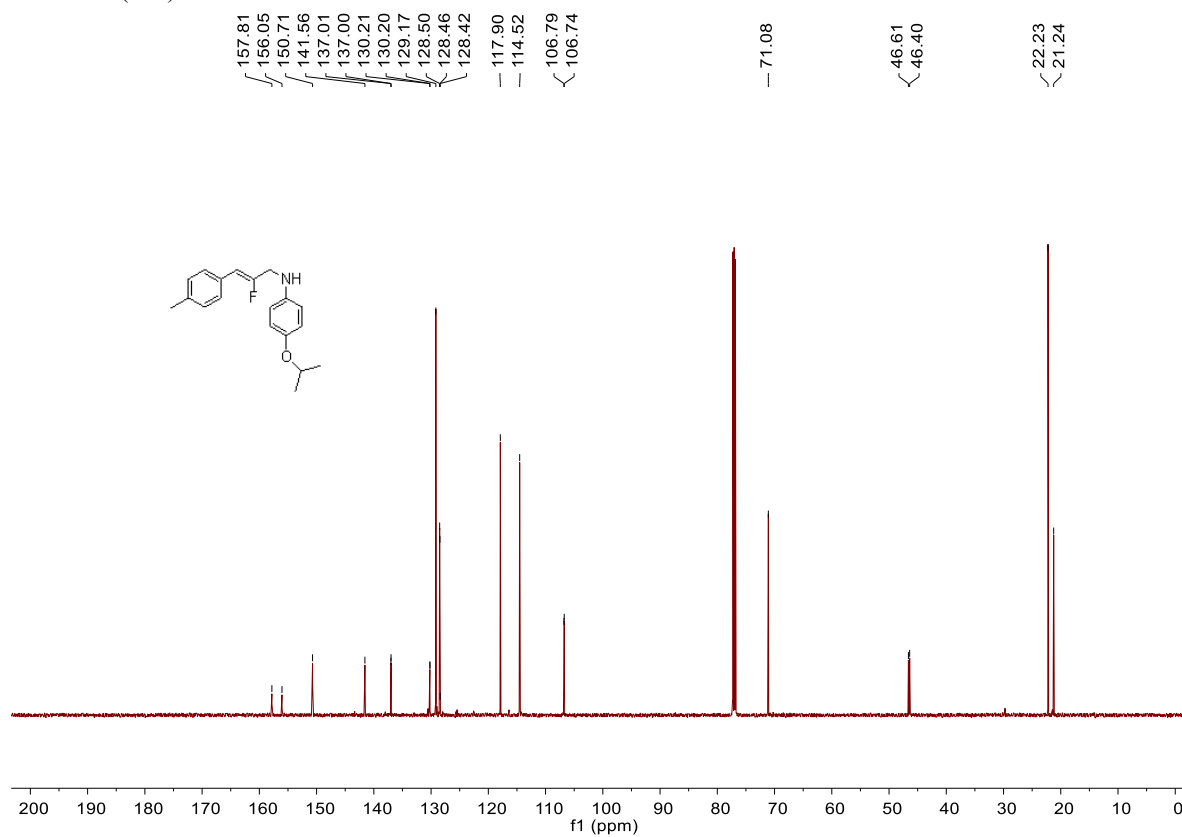

<sup>1</sup>H NMR (c15)

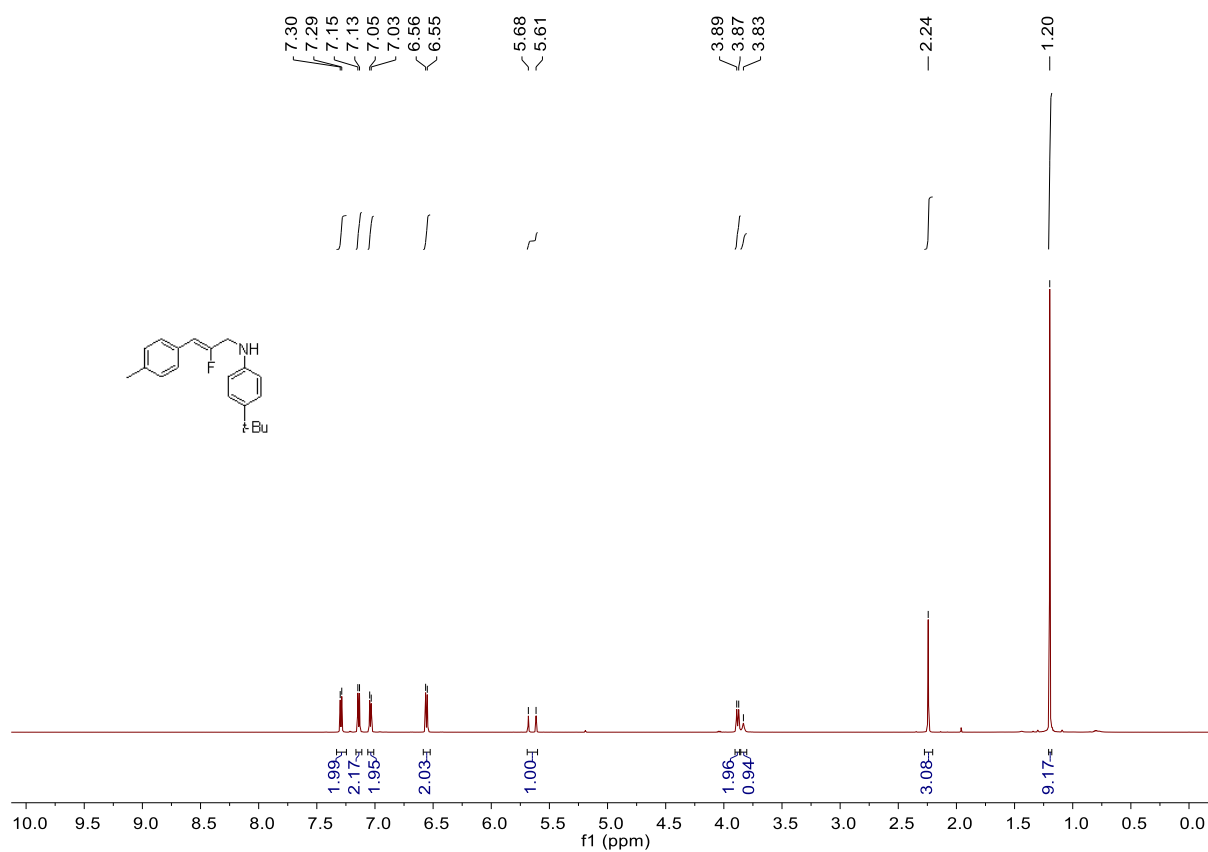

<sup>19</sup>F NMR (c15)

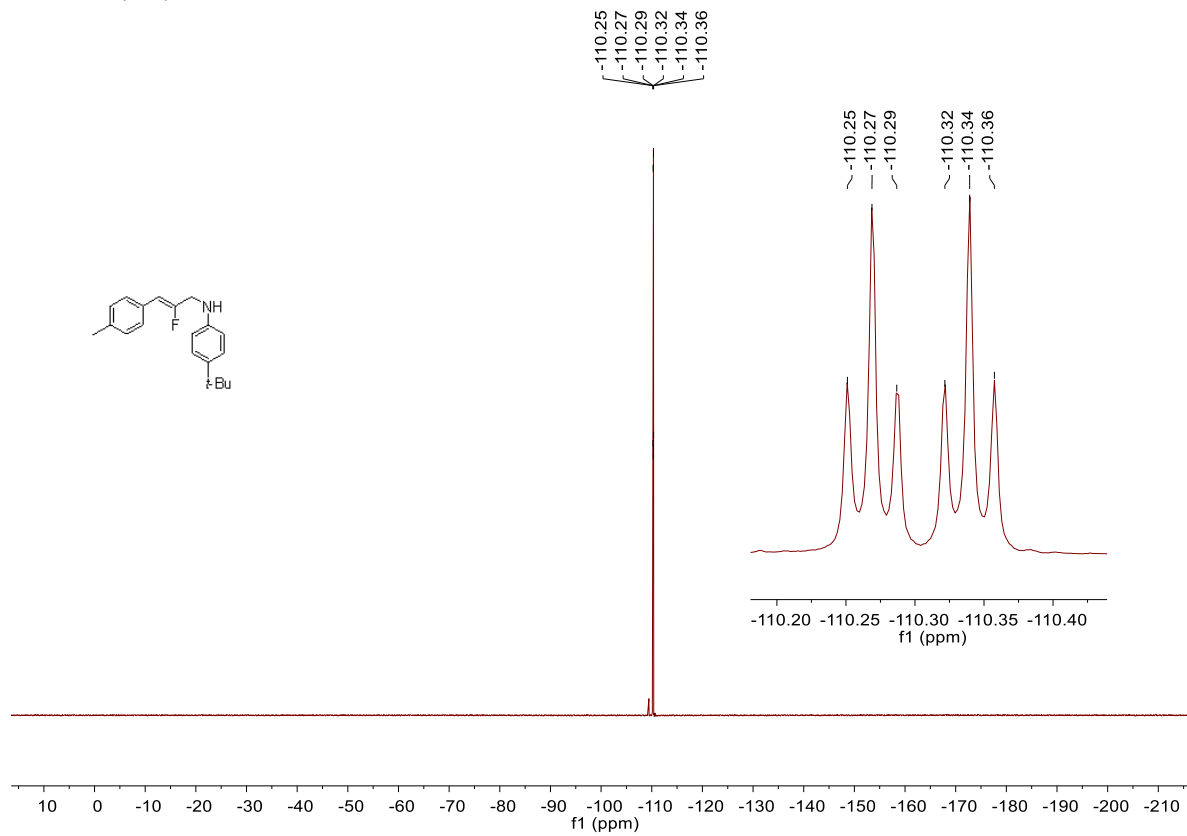



<sup>13</sup>C NMR (c15)

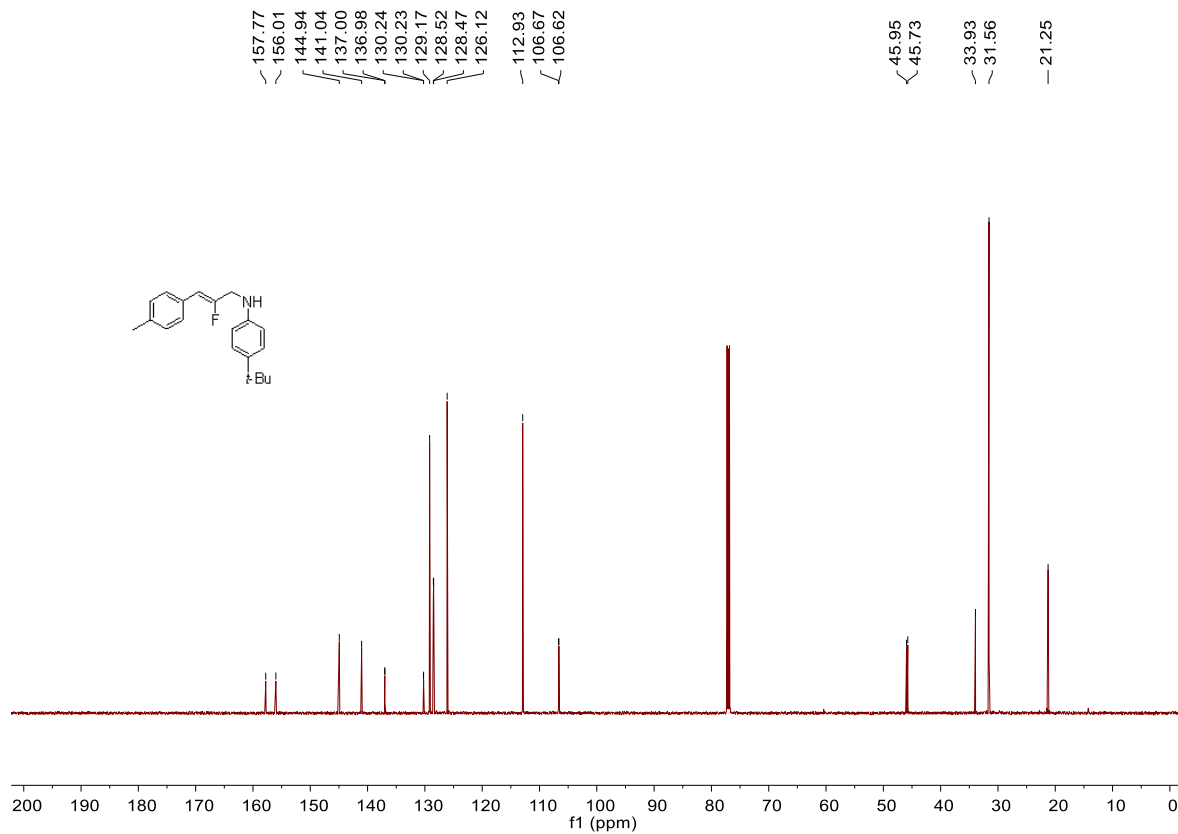

<sup>1</sup>H NMR (c16)

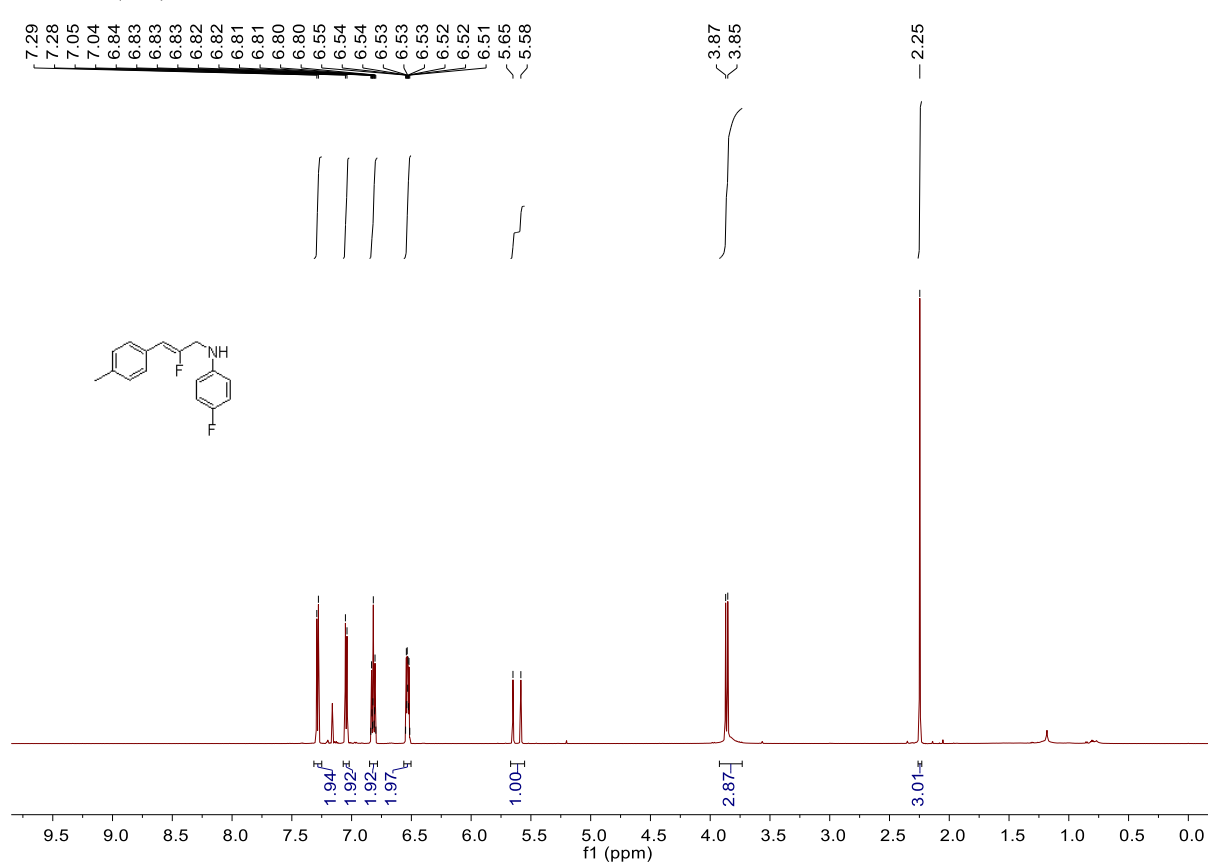

<sup>19</sup>F NMR (c16)

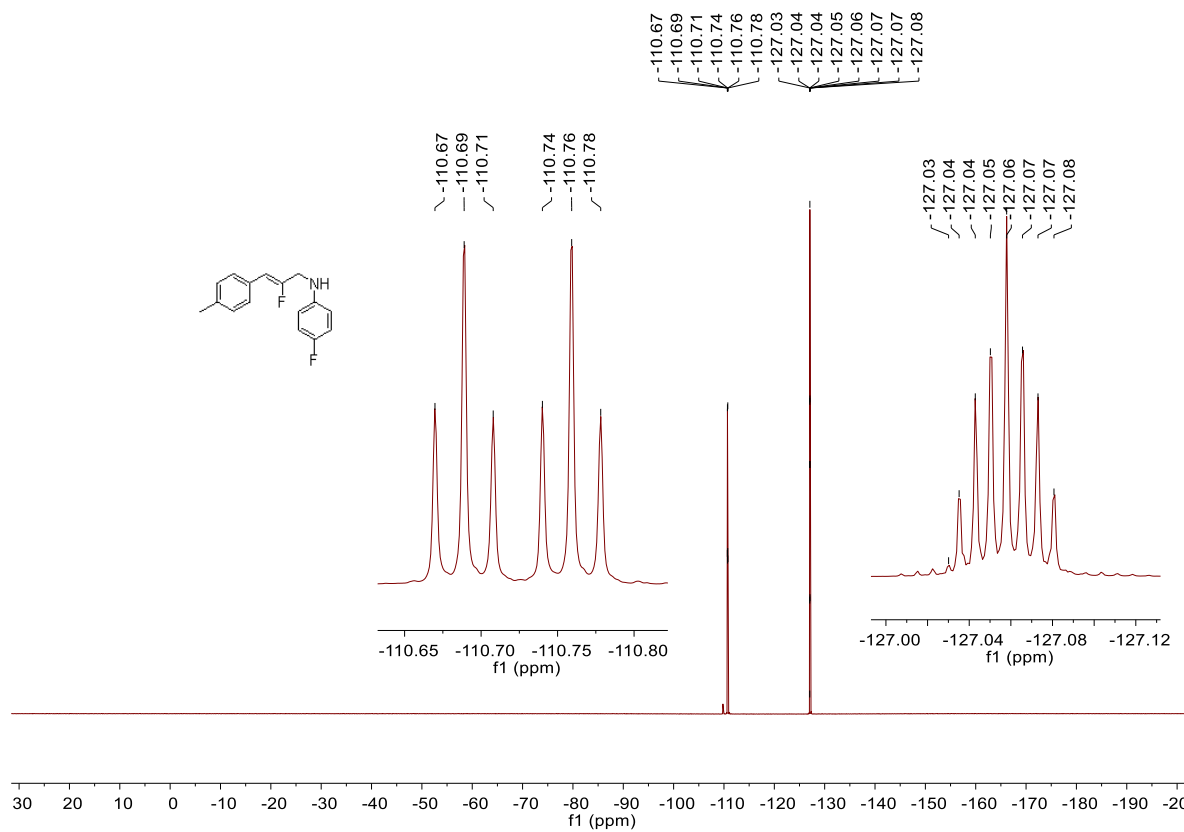

<sup>13</sup>C NMR (c16)

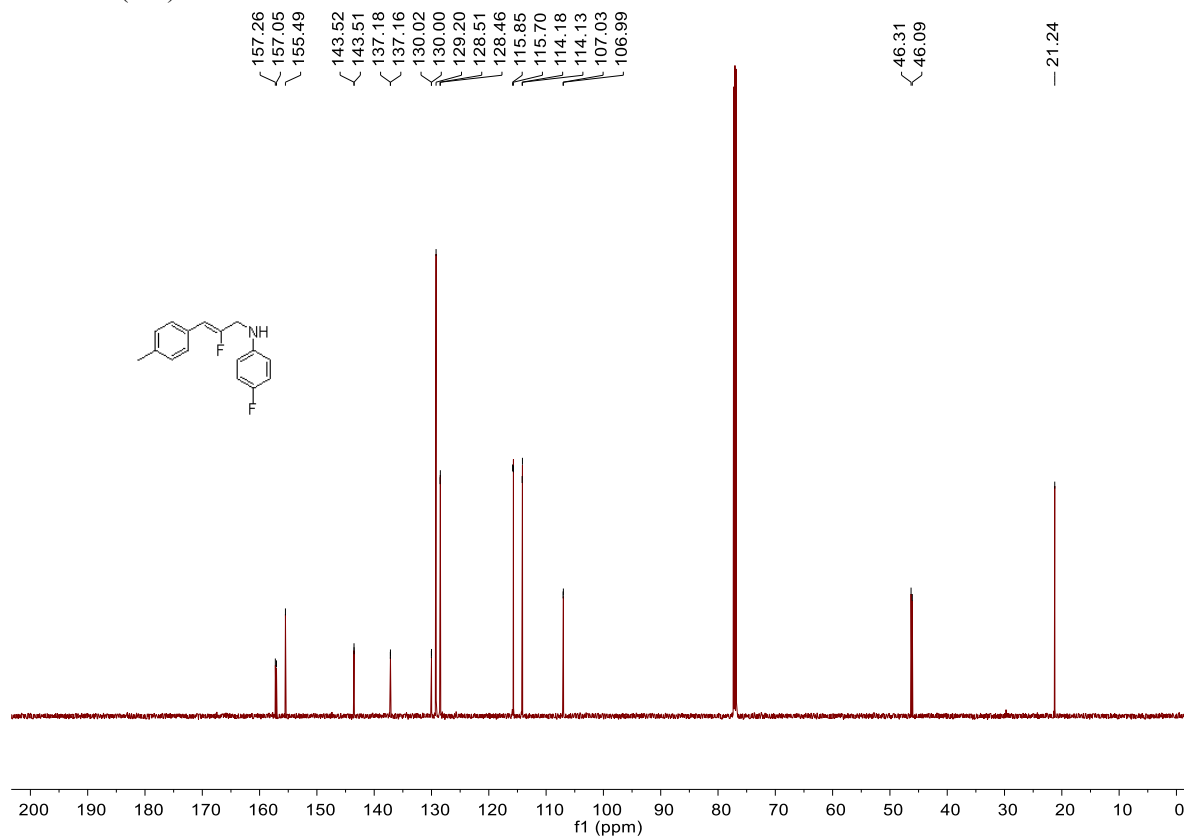

<sup>1</sup>H NMR (c17)

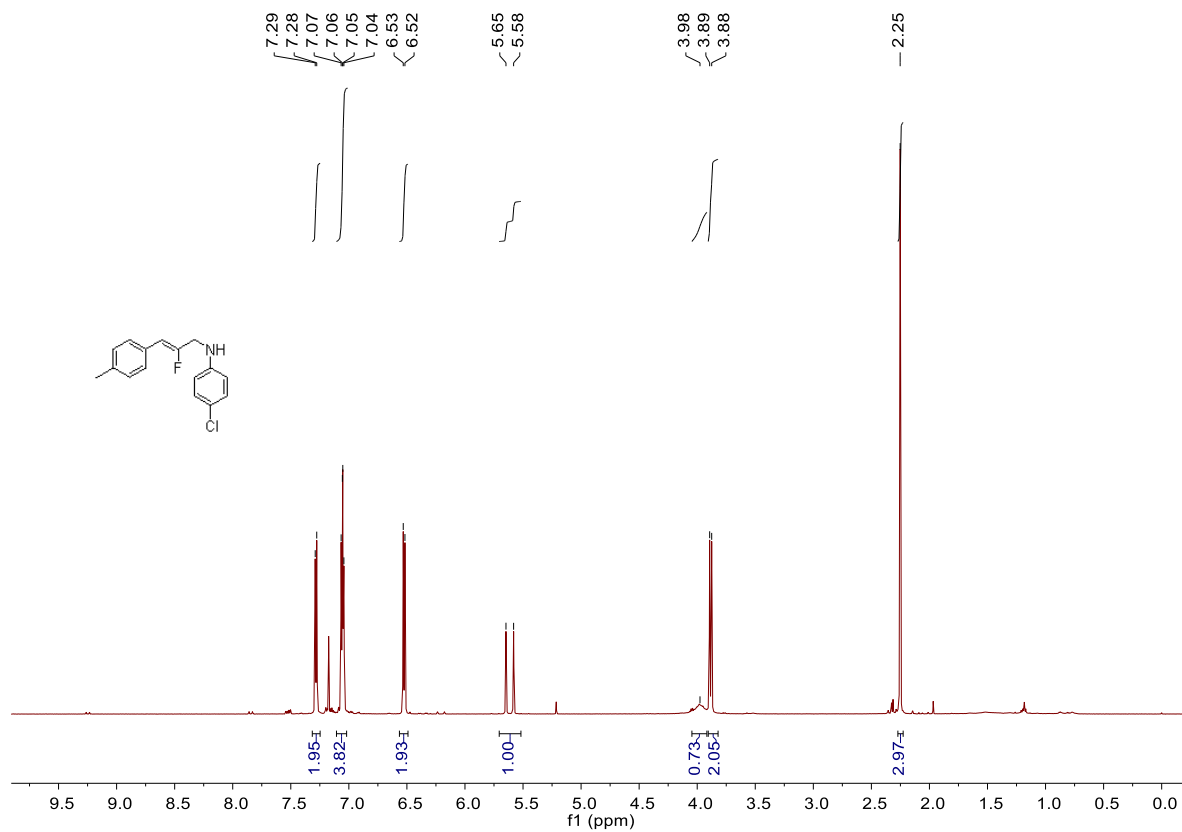

<sup>19</sup>F NMR (c17)

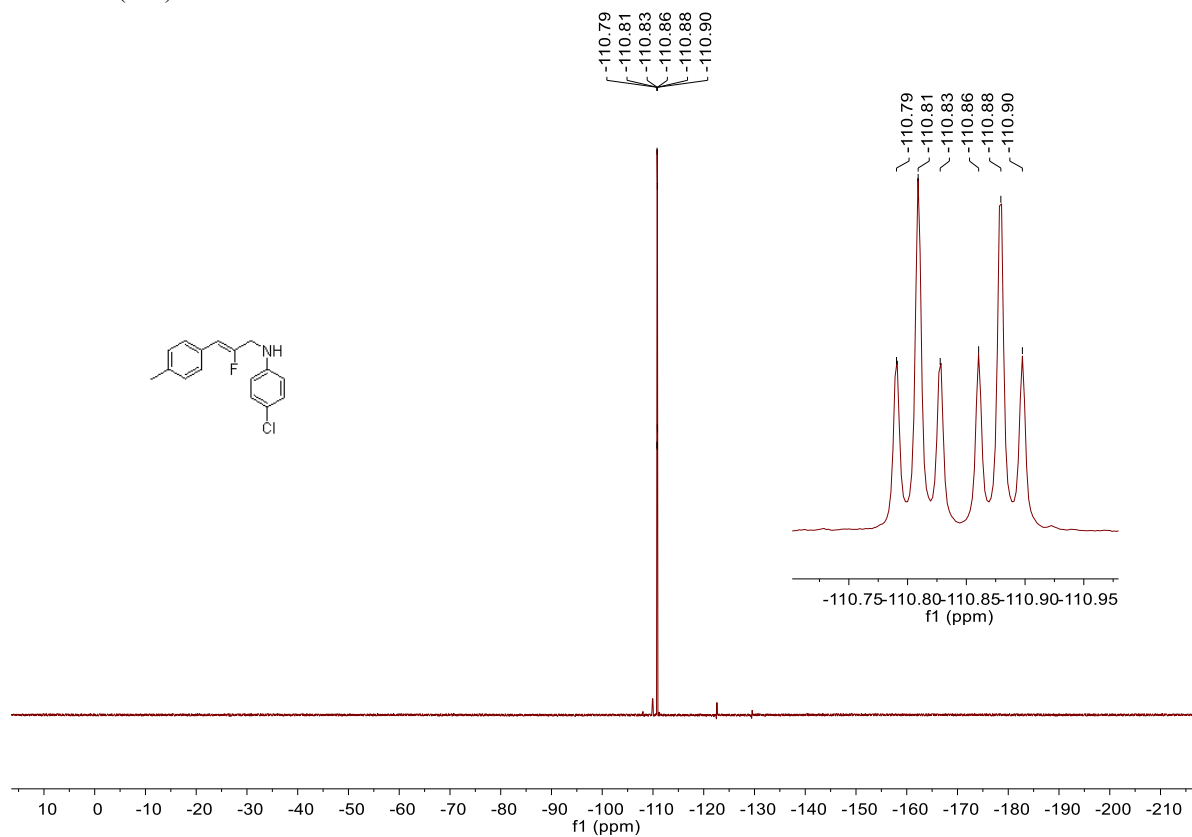

<sup>13</sup>C NMR (c17)

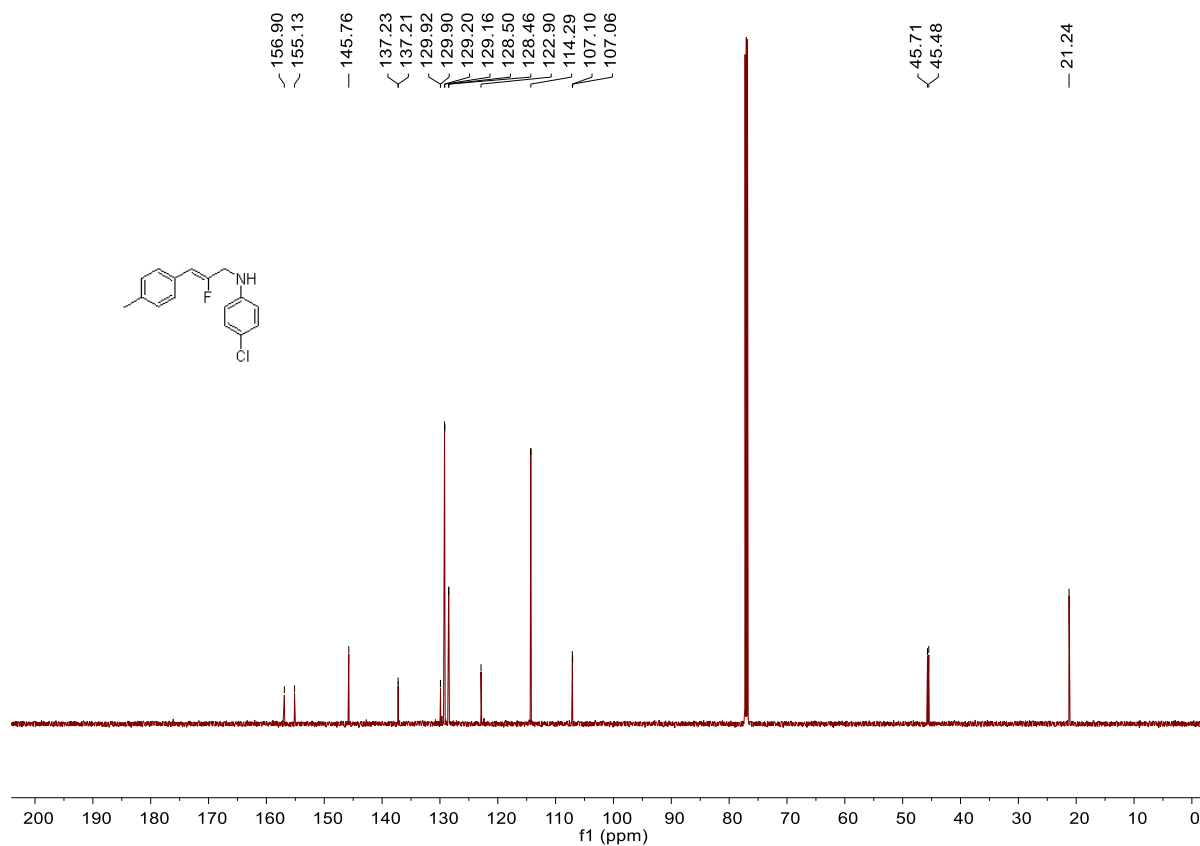

<sup>1</sup>H NMR (c18)

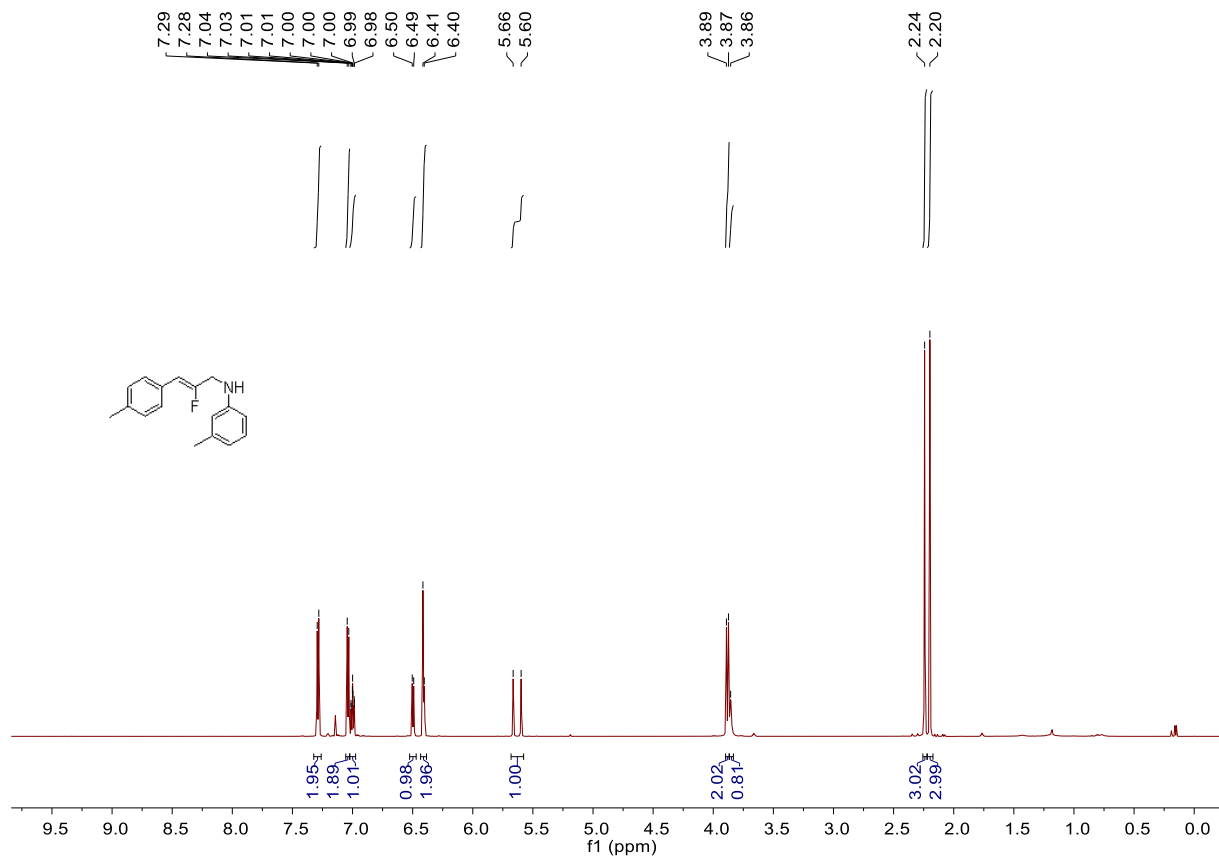

<sup>19</sup>F NMR (c18)

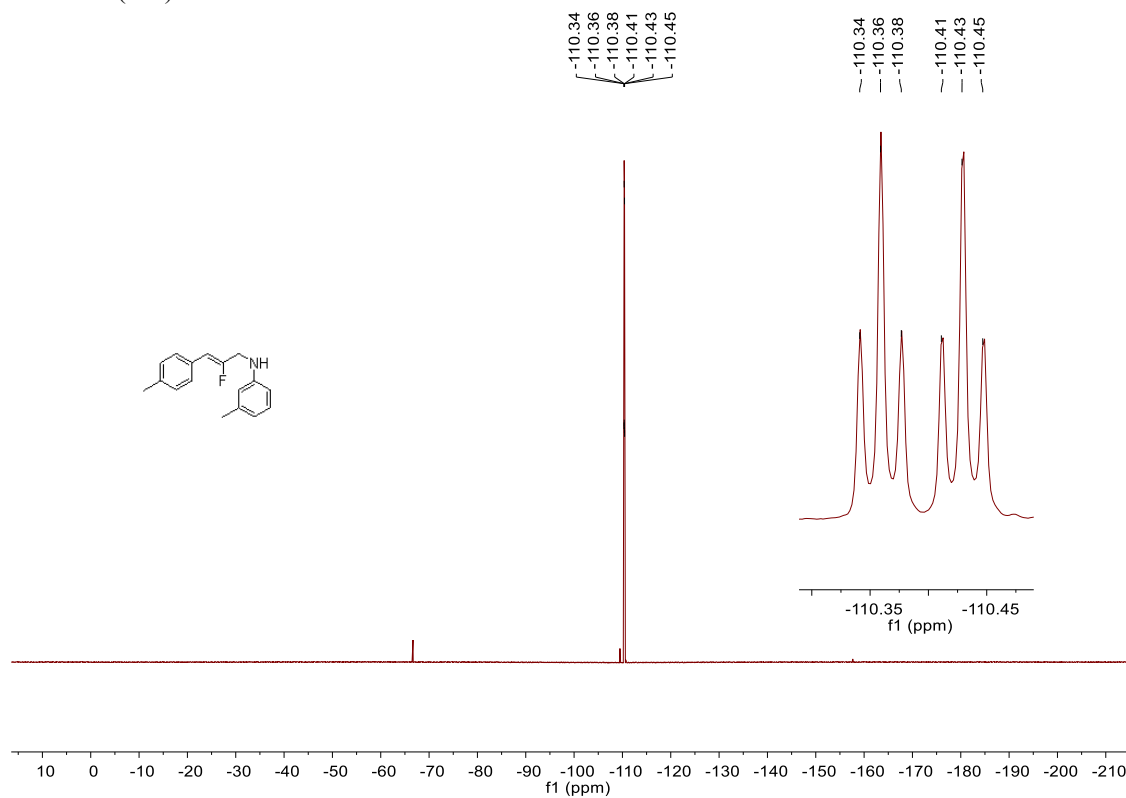

<sup>13</sup>C NMR (c18)

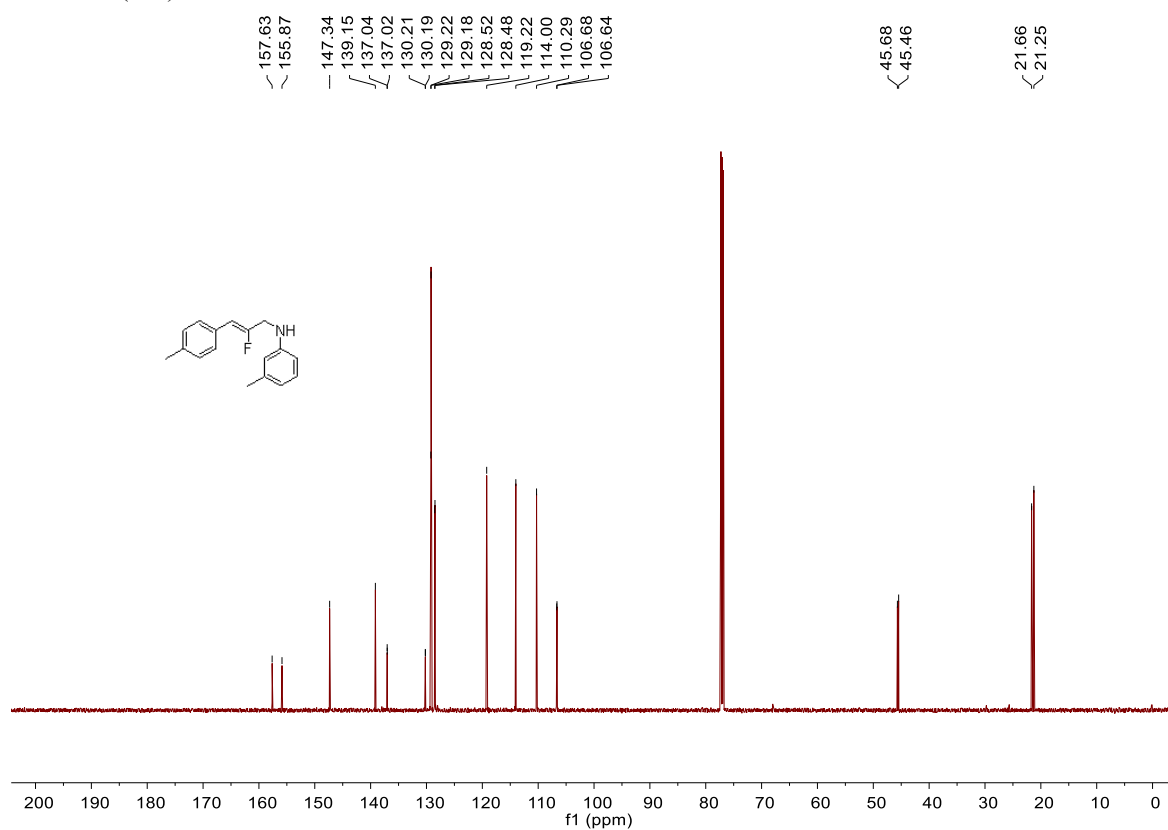

<sup>1</sup>H NMR (c19)

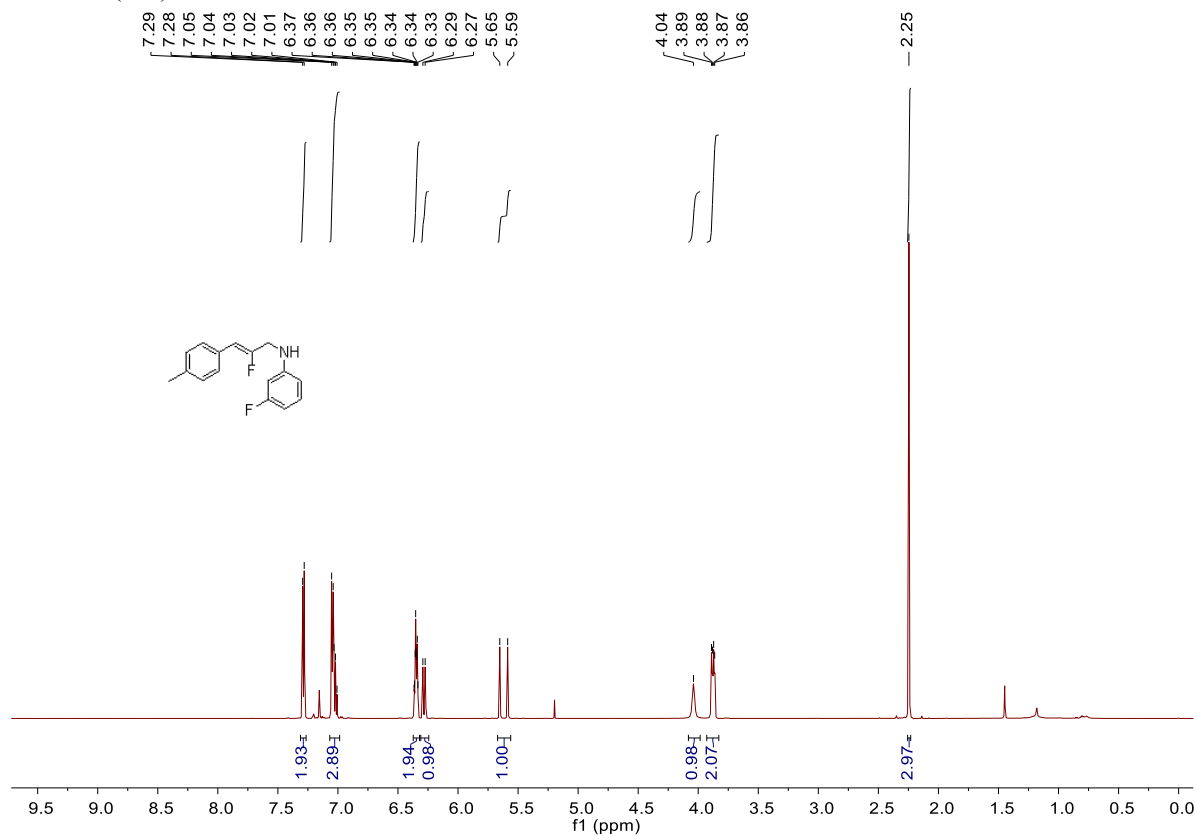

<sup>19</sup>F NMR (c19)

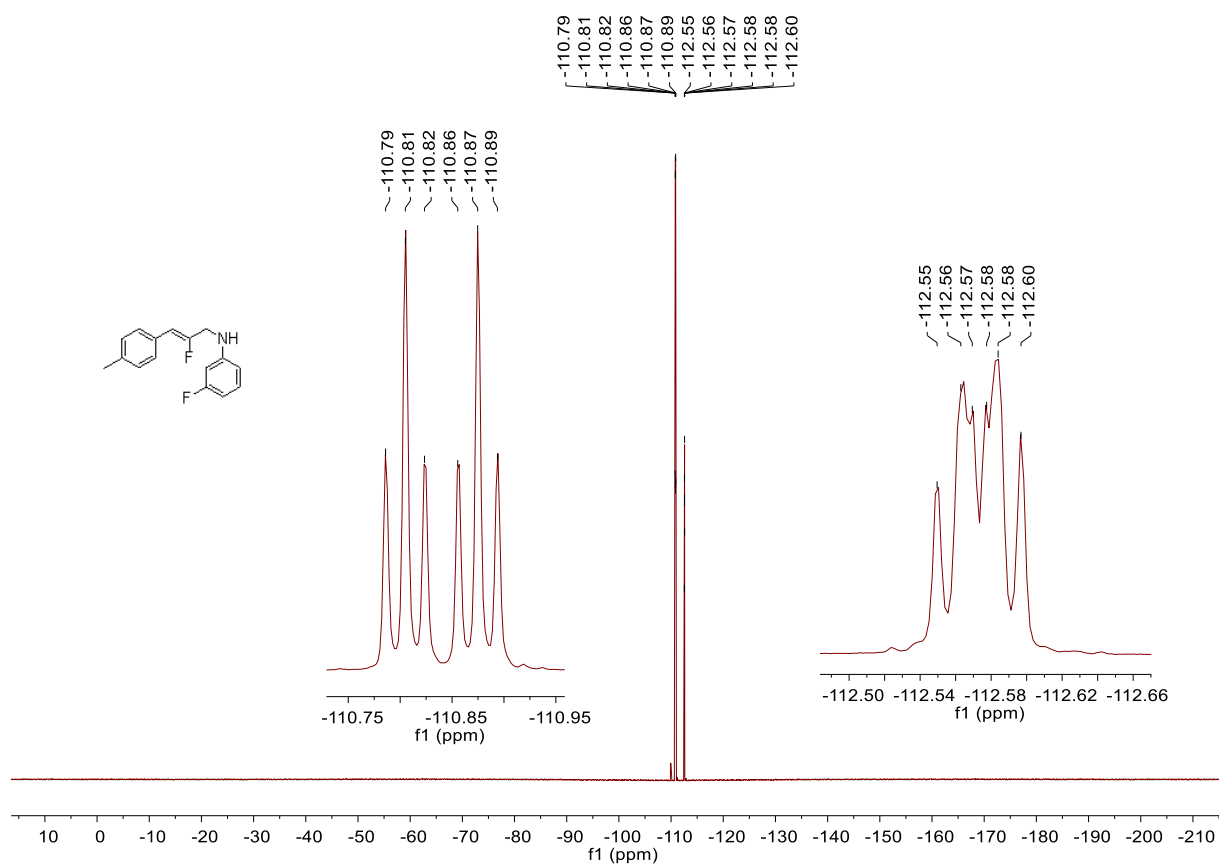

<sup>13</sup>C NMR (c19)

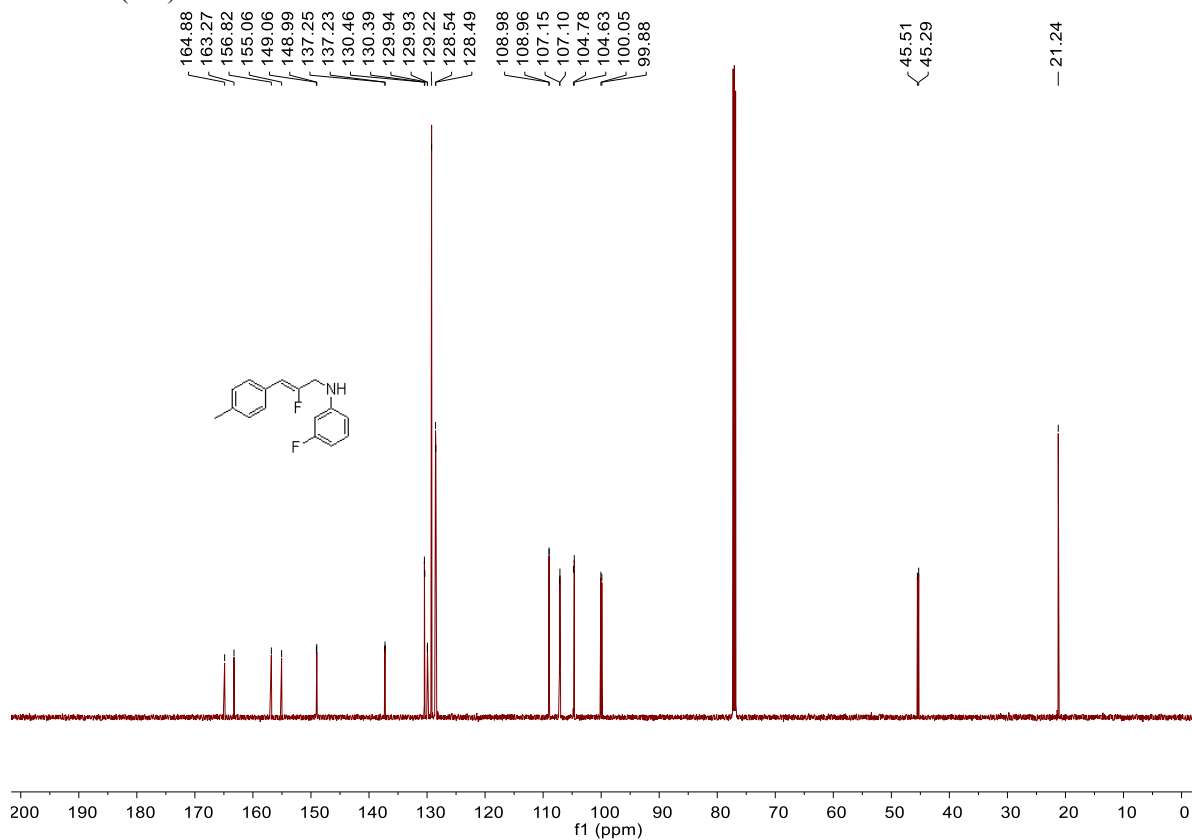

<sup>1</sup>H NMR (c20)

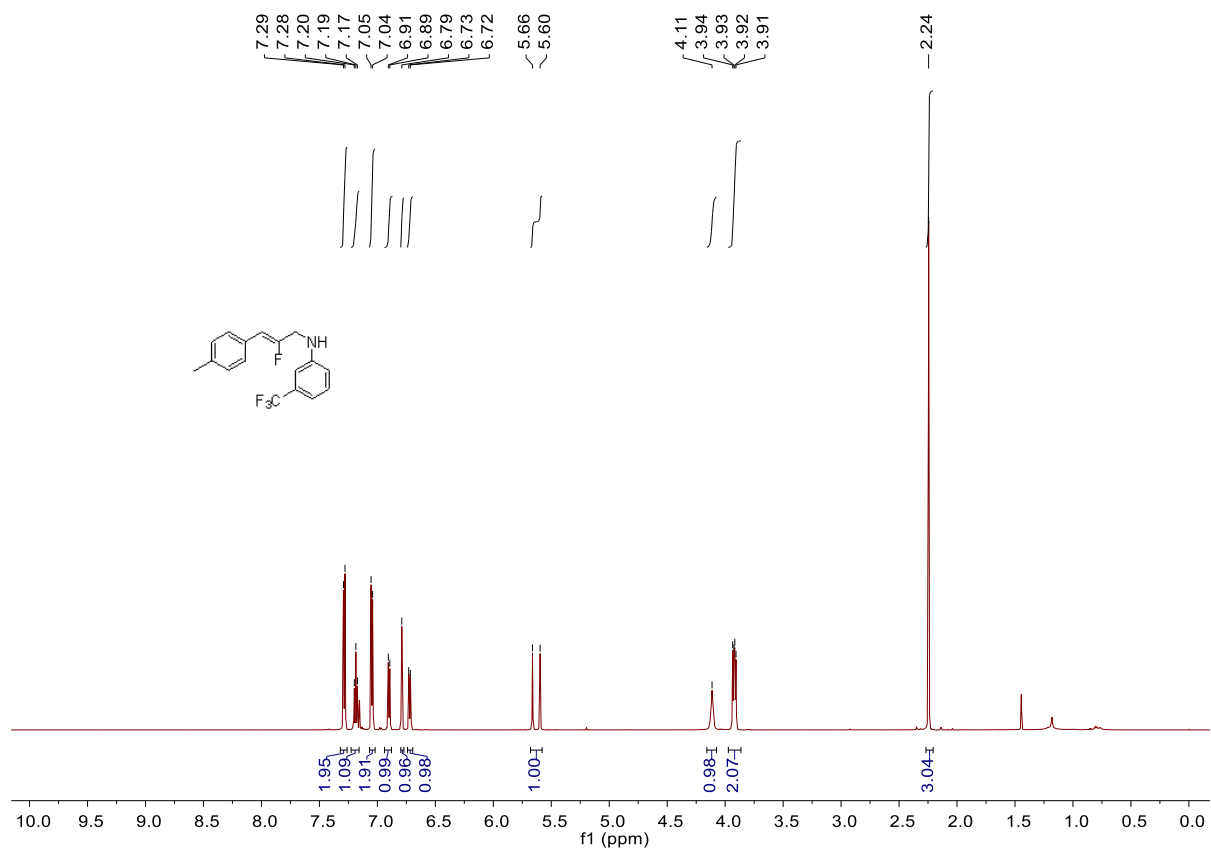

<sup>19</sup>F NMR (c20)

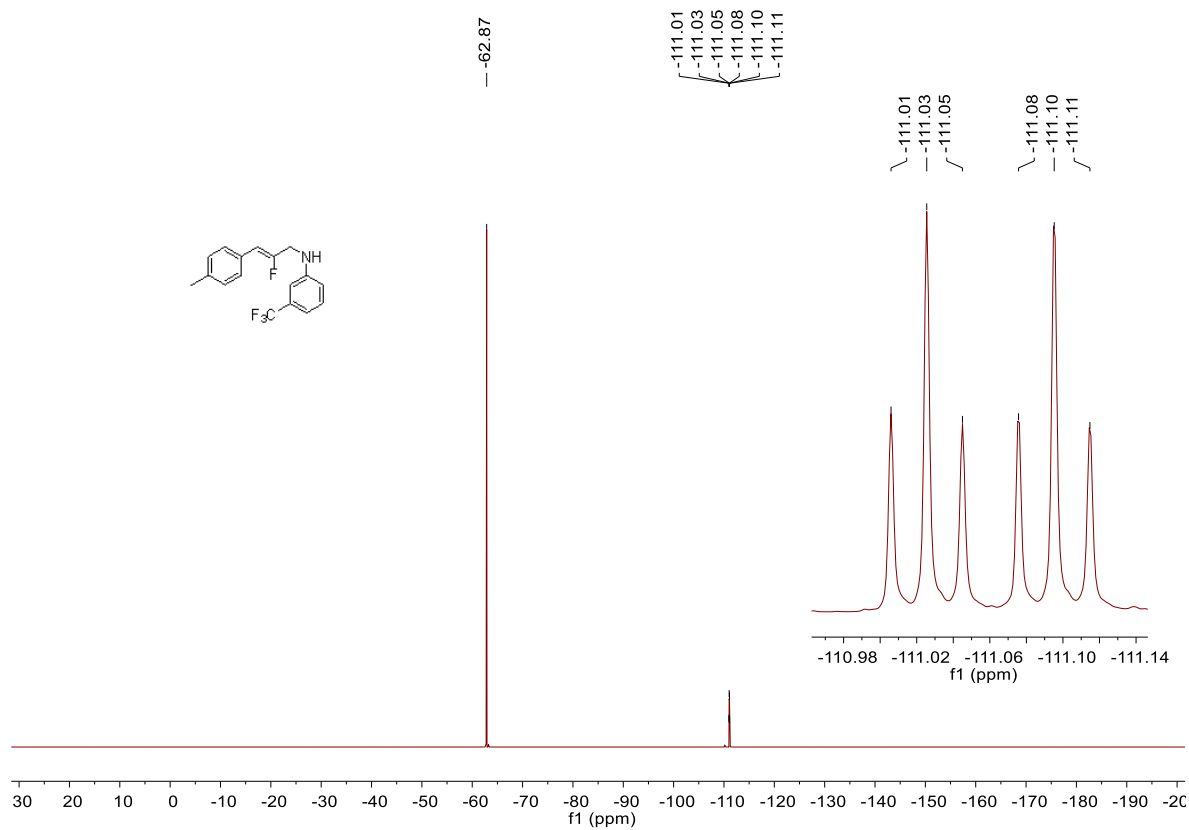

<sup>13</sup>C NMR (c20)

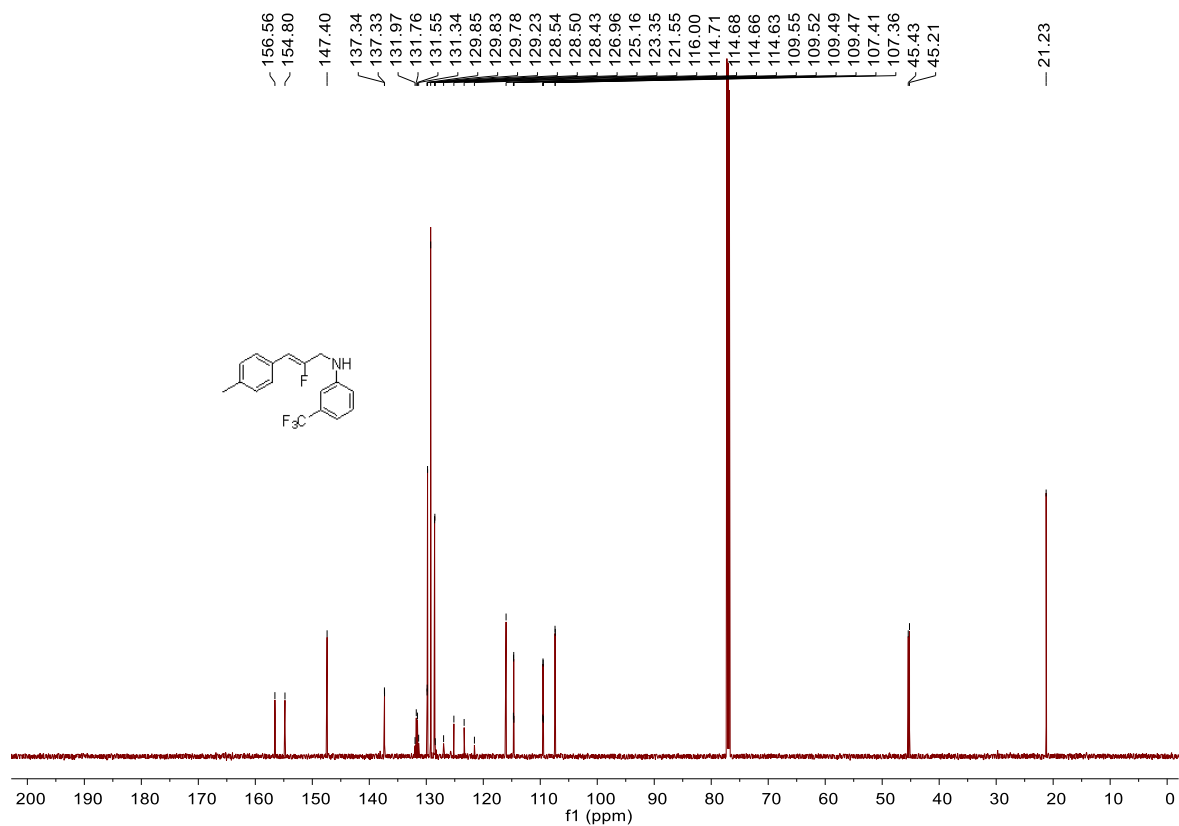



<sup>1</sup>H NMR (c21)

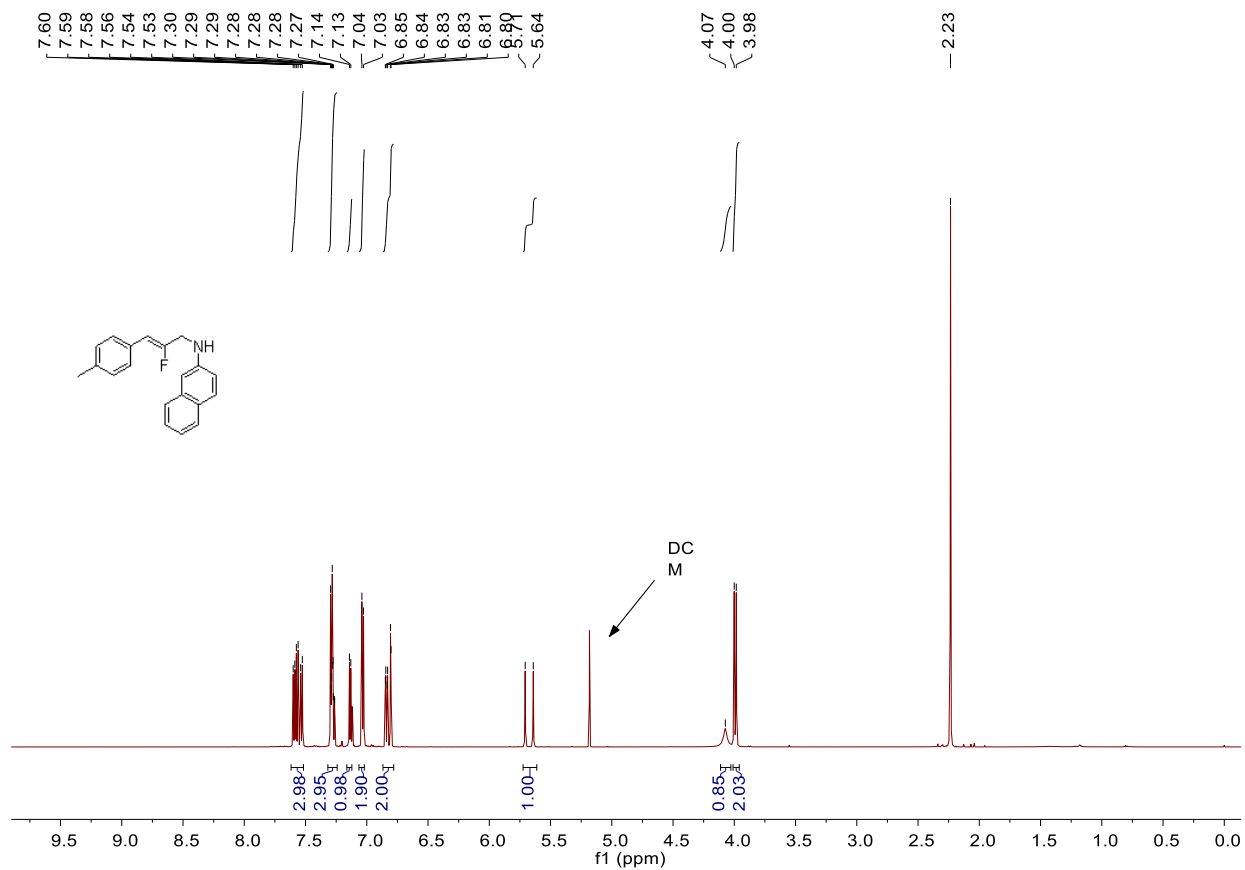

<sup>19</sup>F NMR (c21)

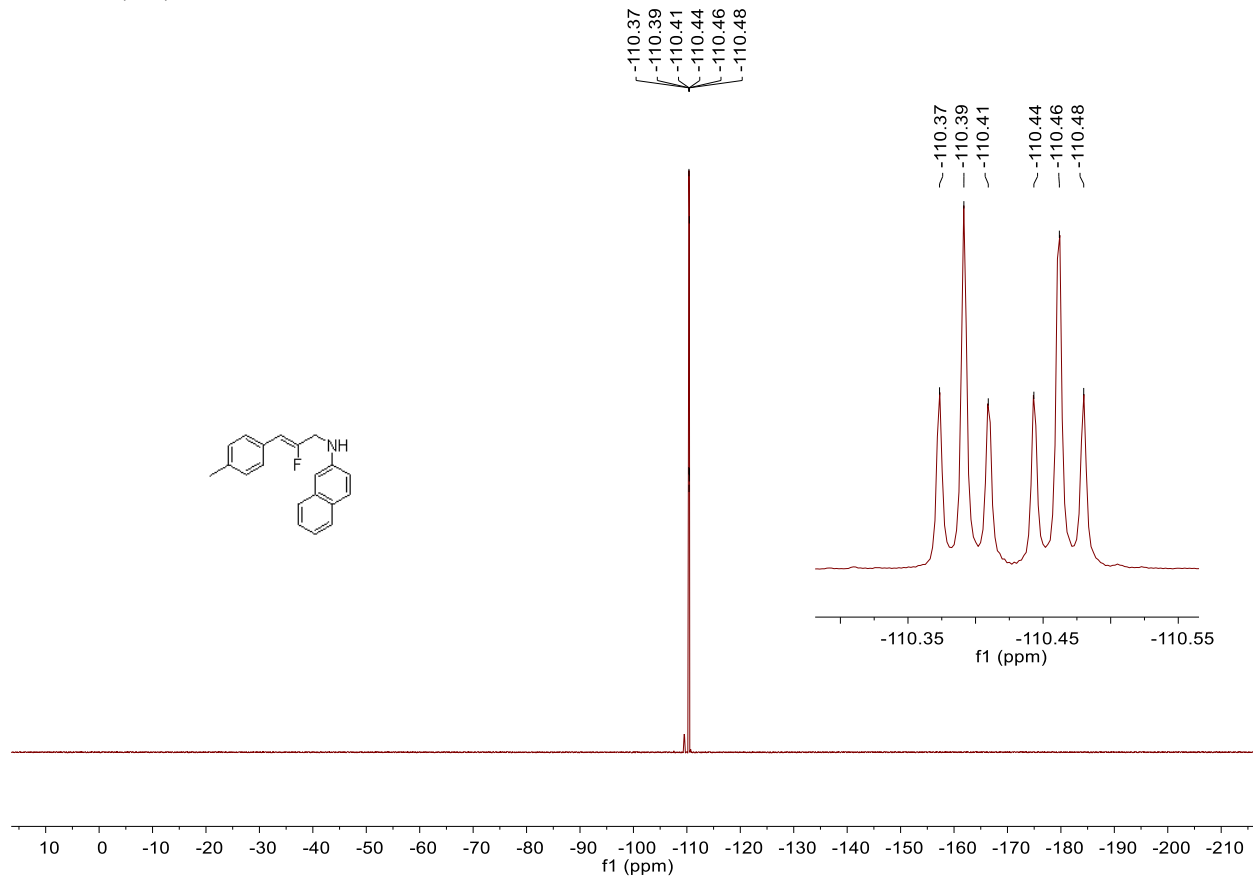

<sup>13</sup>C NMR (c21)

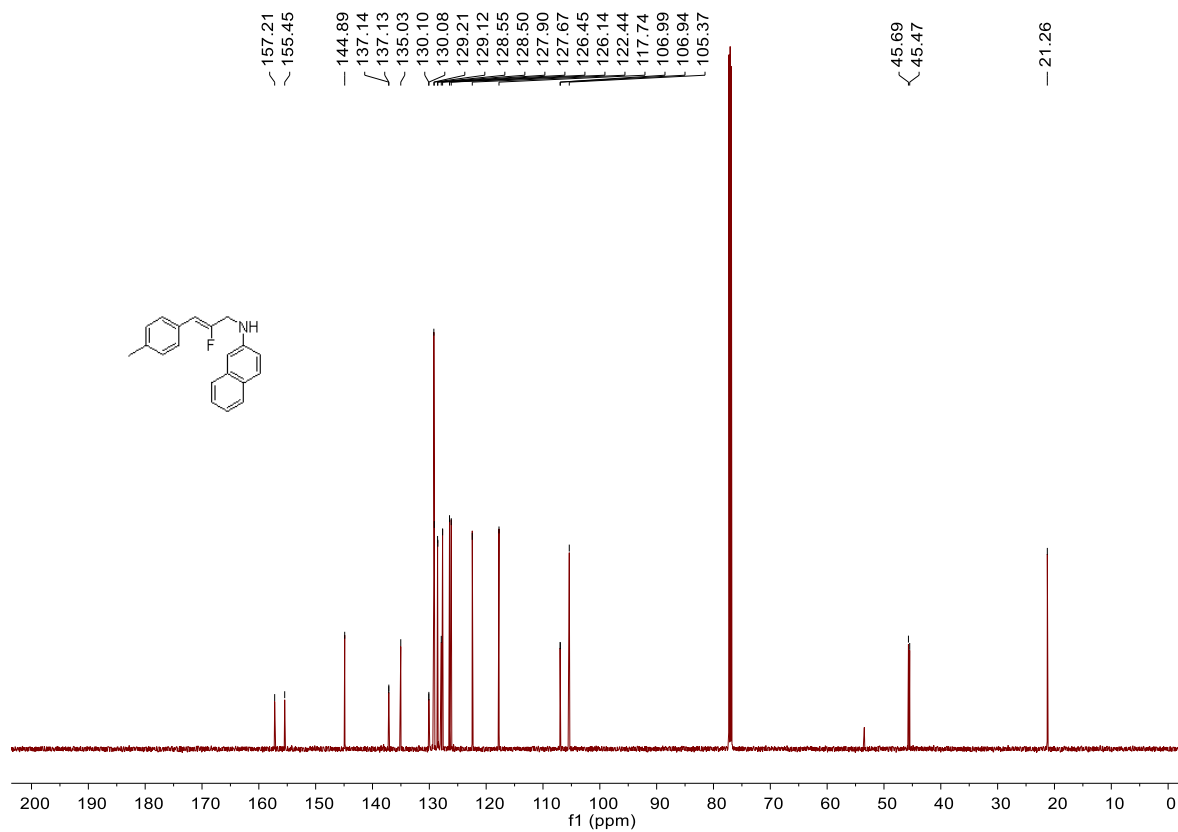

<sup>1</sup>H NMR (c22)

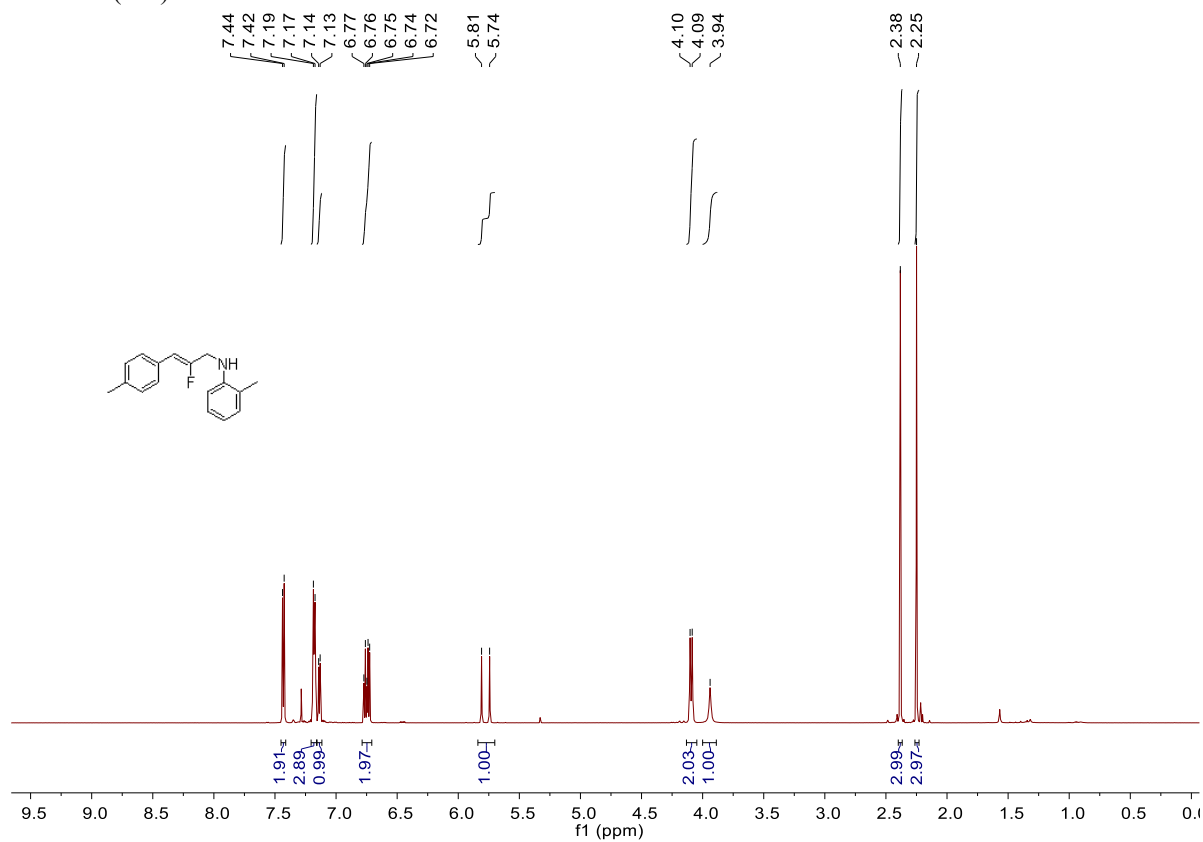

<sup>19</sup>F NMR (c22)

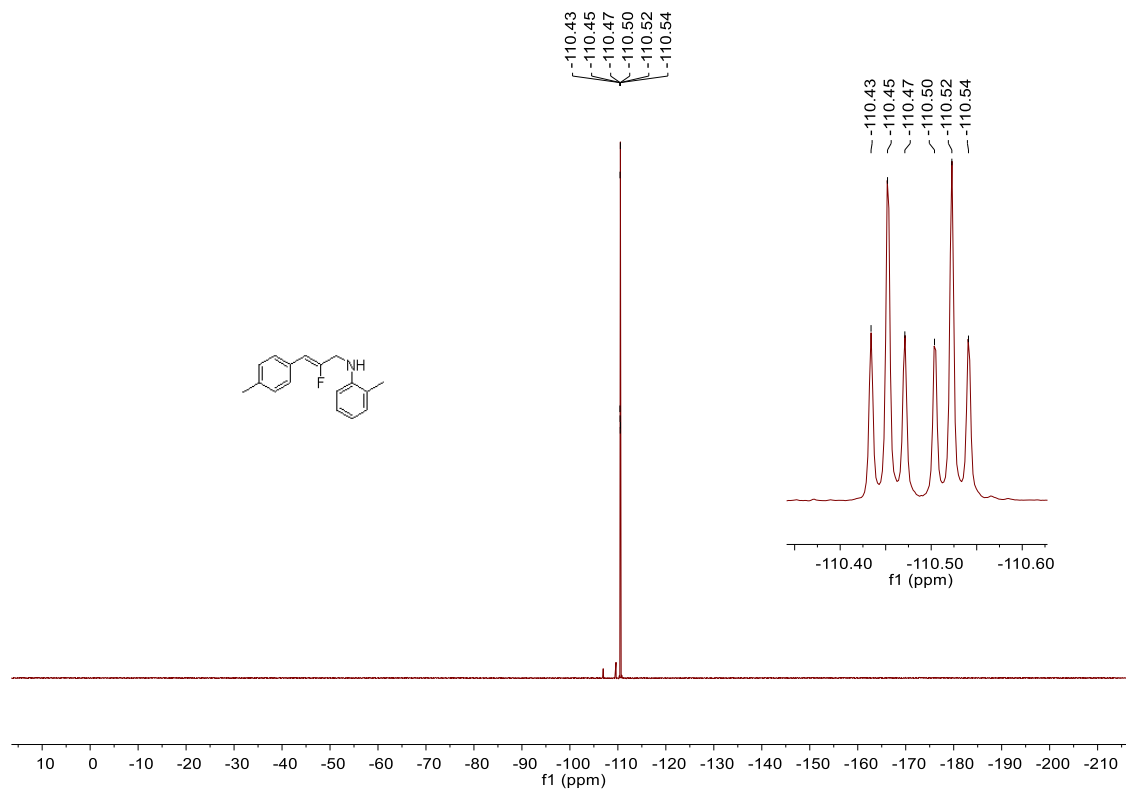

<sup>13</sup>C NMR (c22)

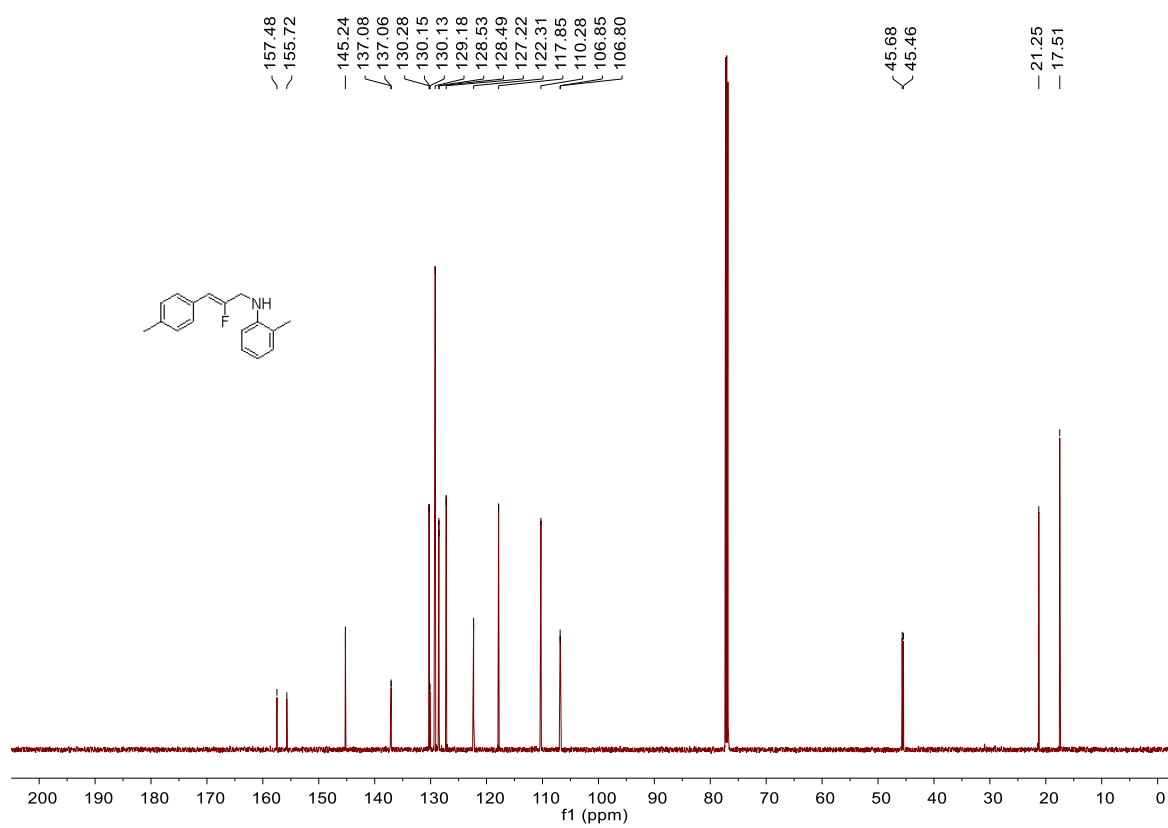

### <sup>1</sup>H NMR (c23)

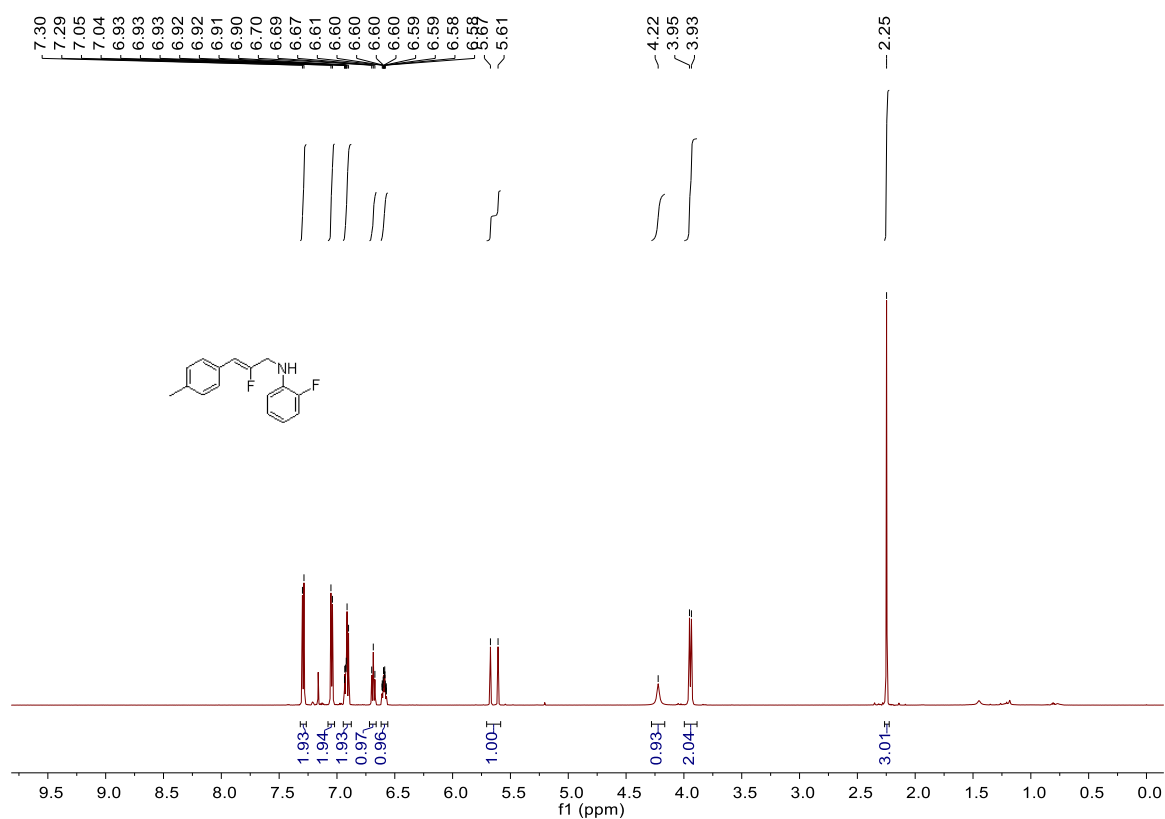

### <sup>19</sup>F NMR (c23)

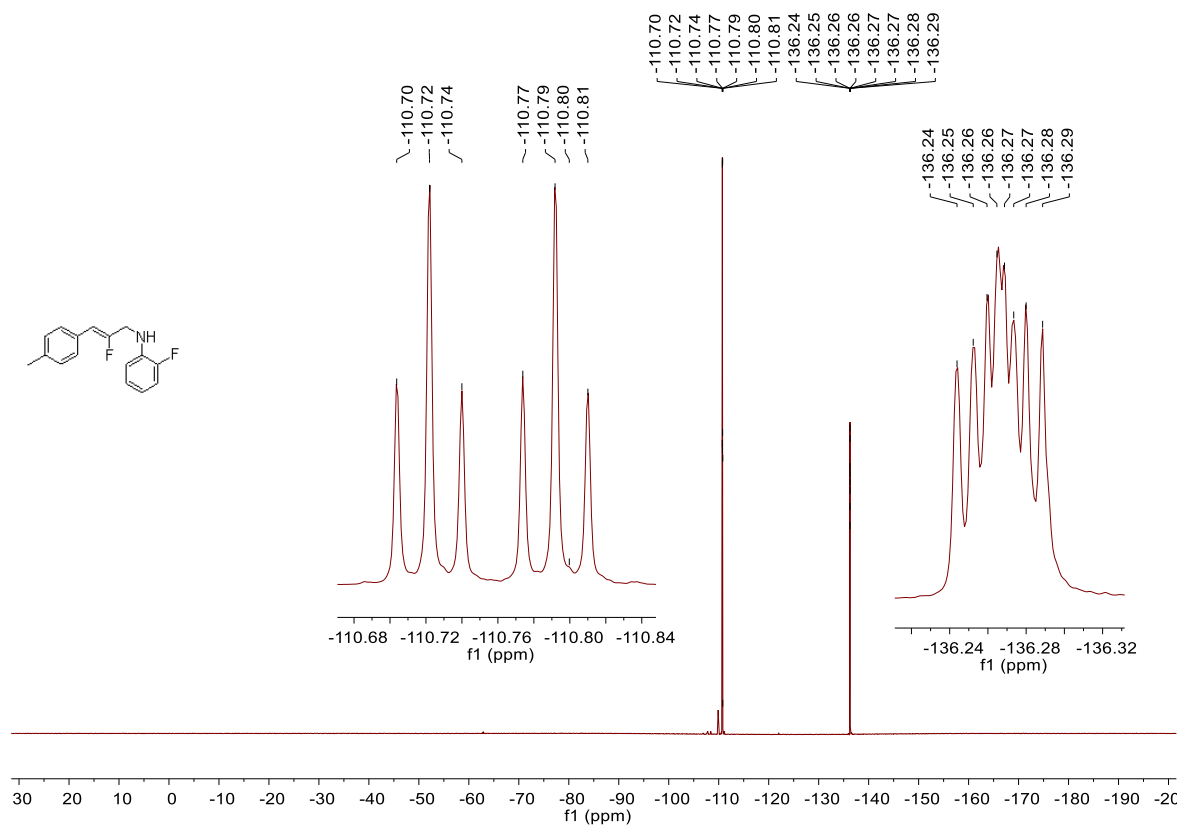

<sup>13</sup>C NMR (c23)

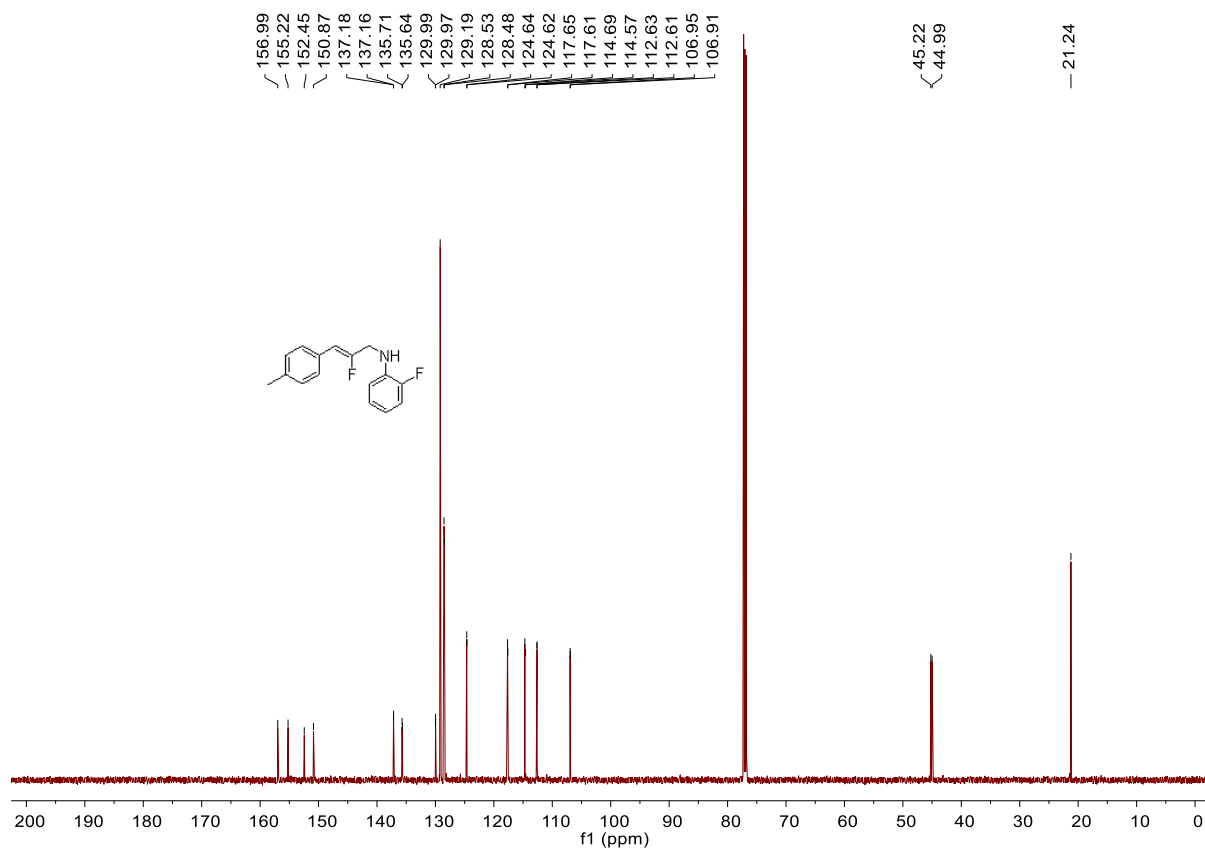

<sup>1</sup>H NMR (c24)

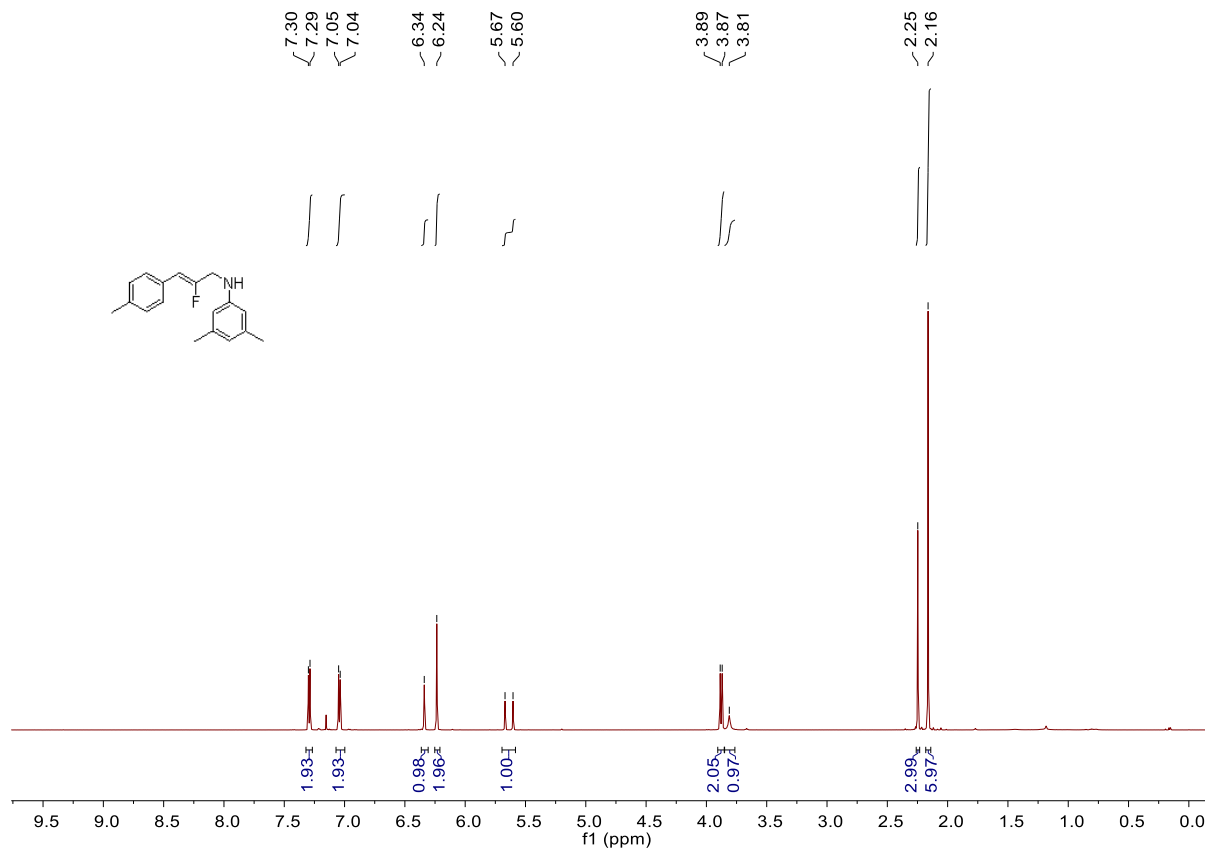

<sup>19</sup>F NMR (c24)

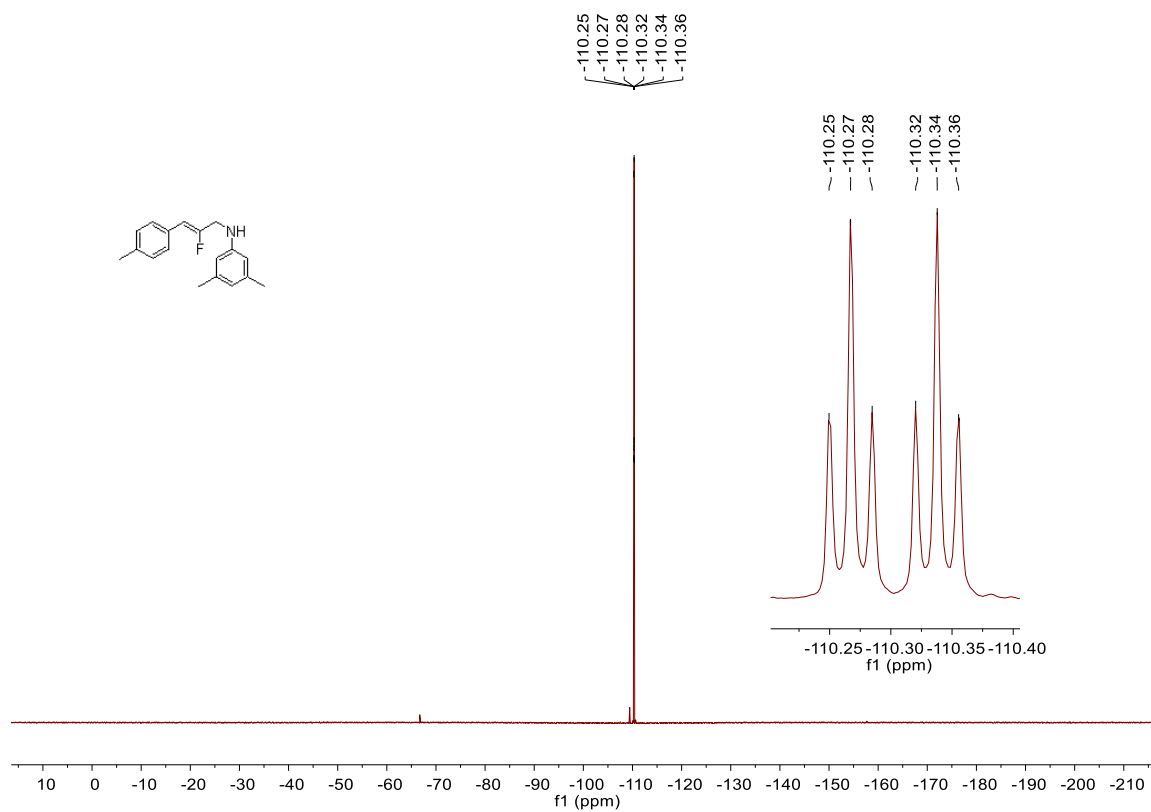

<sup>13</sup>C NMR (c24)

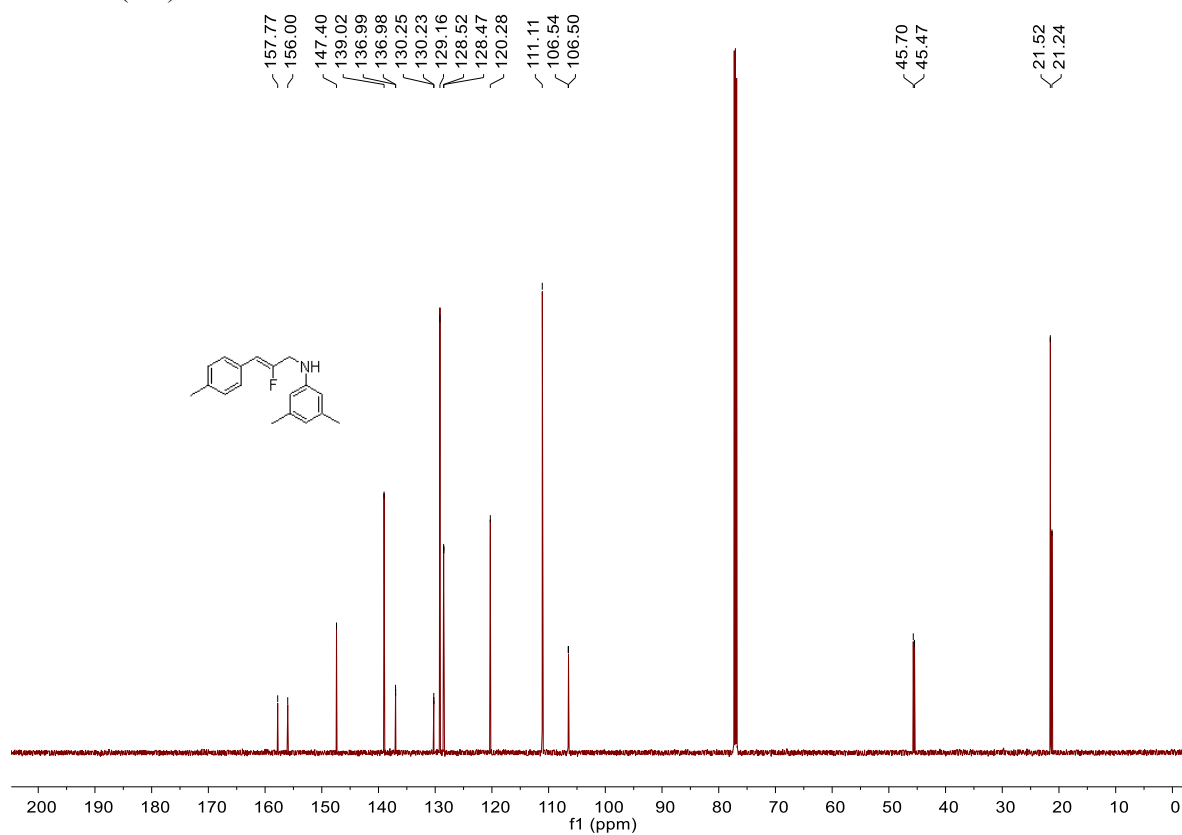

<sup>1</sup>H NMR (c25)

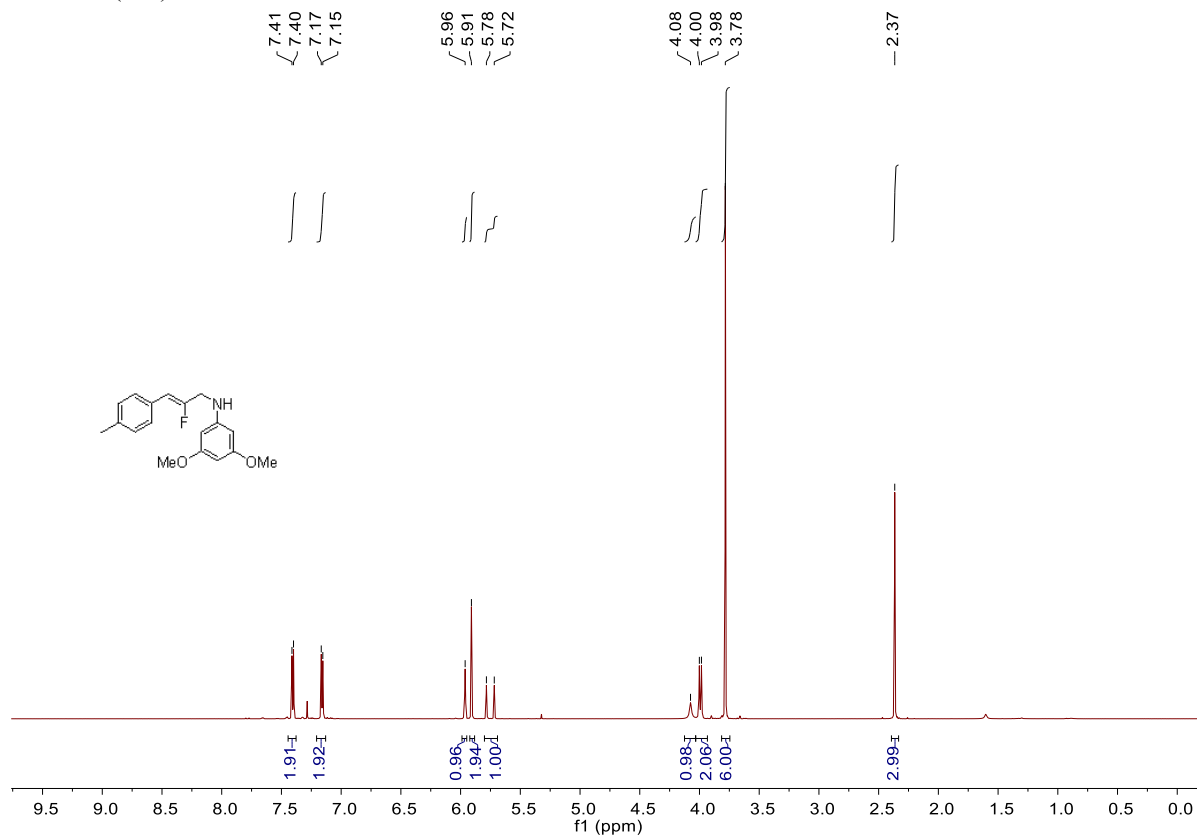

<sup>19</sup>F NMR (c25)

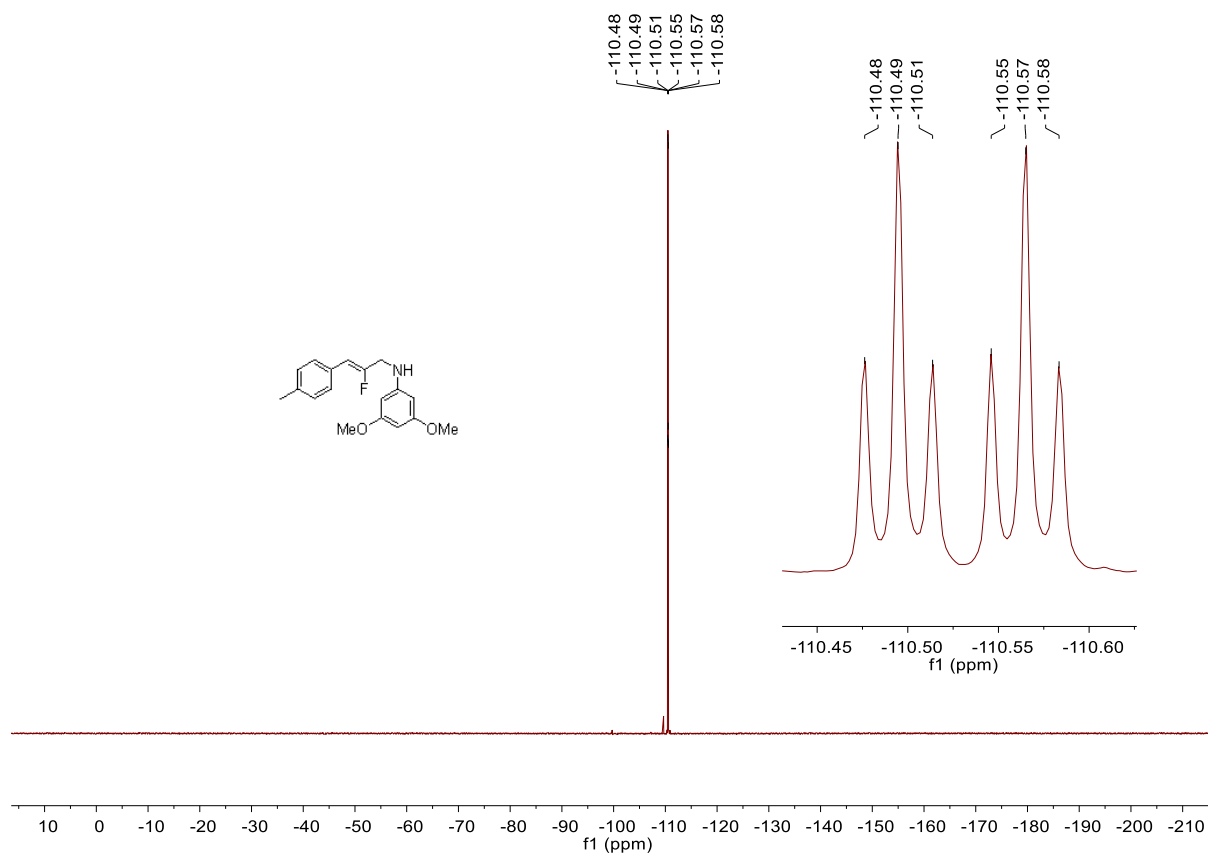

<sup>13</sup>C NMR (c25)

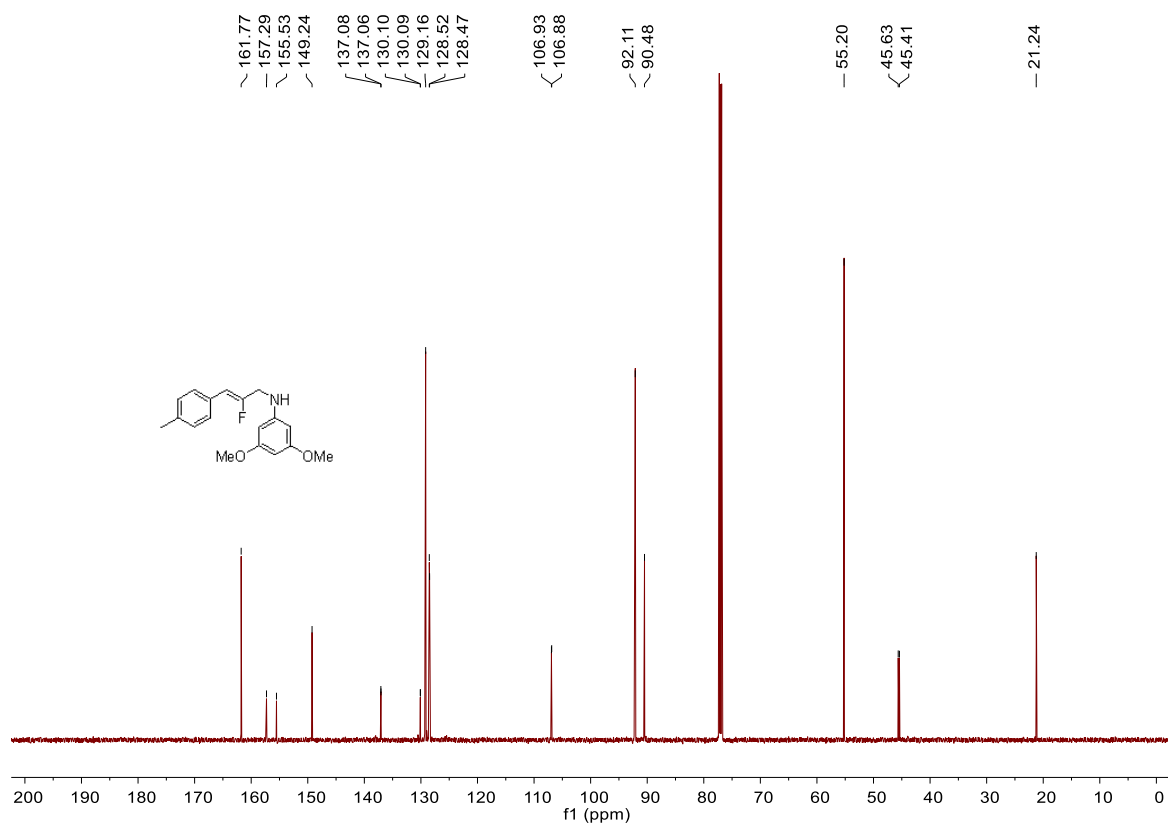

<sup>1</sup>H NMR (c26)

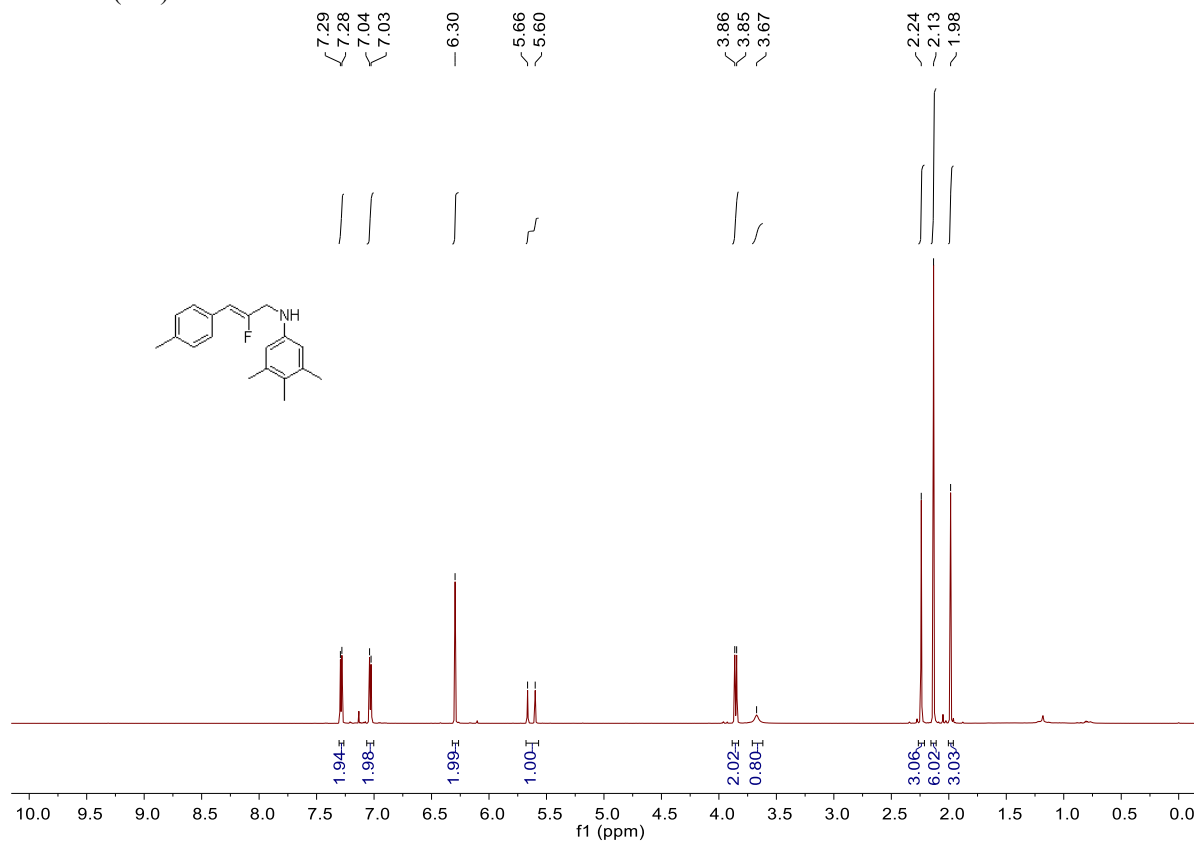



<sup>19</sup>F NMR (c26)

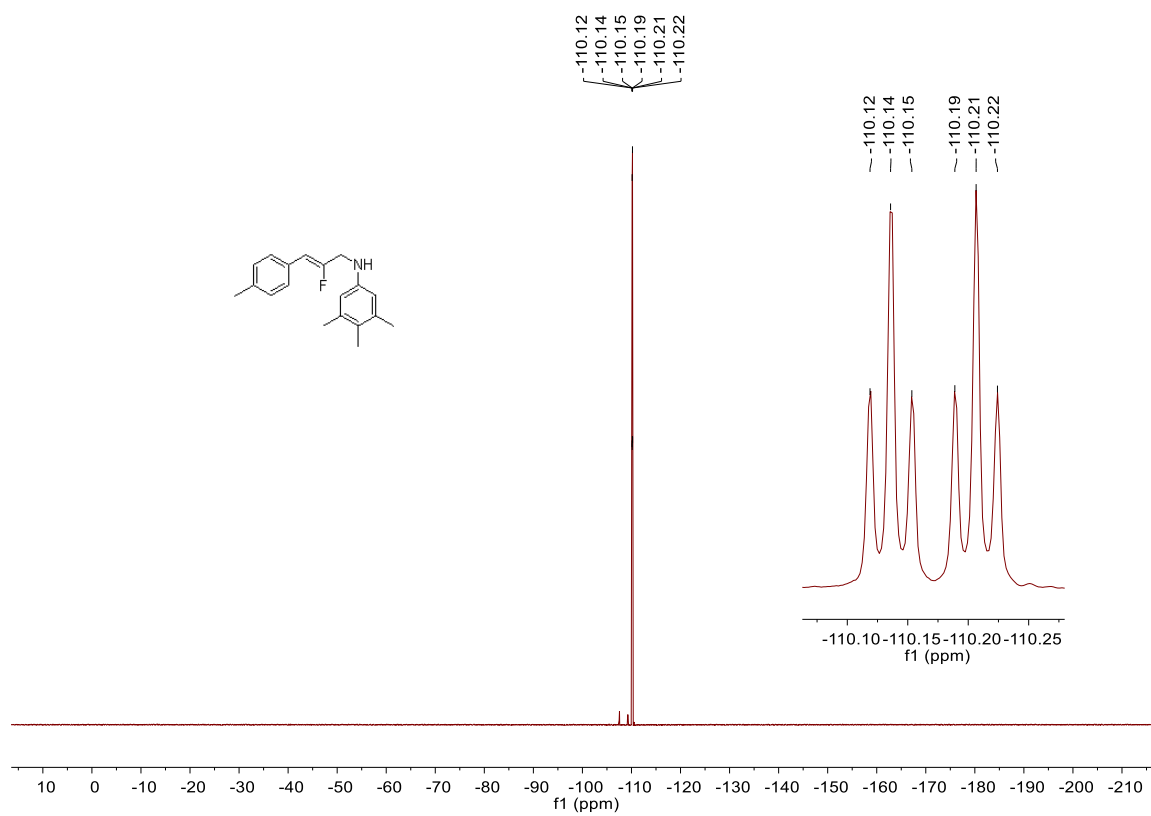

<sup>13</sup>C NMR (c26)

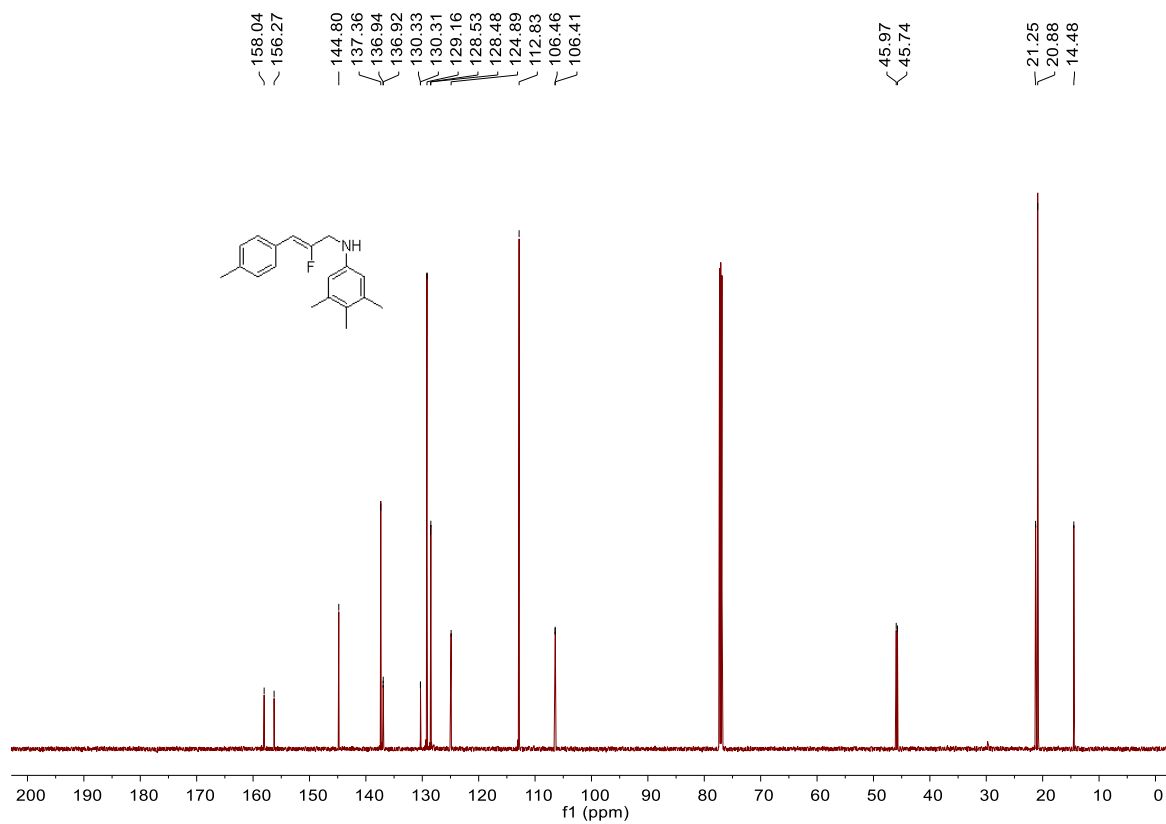

<sup>1</sup>H NMR (c27)

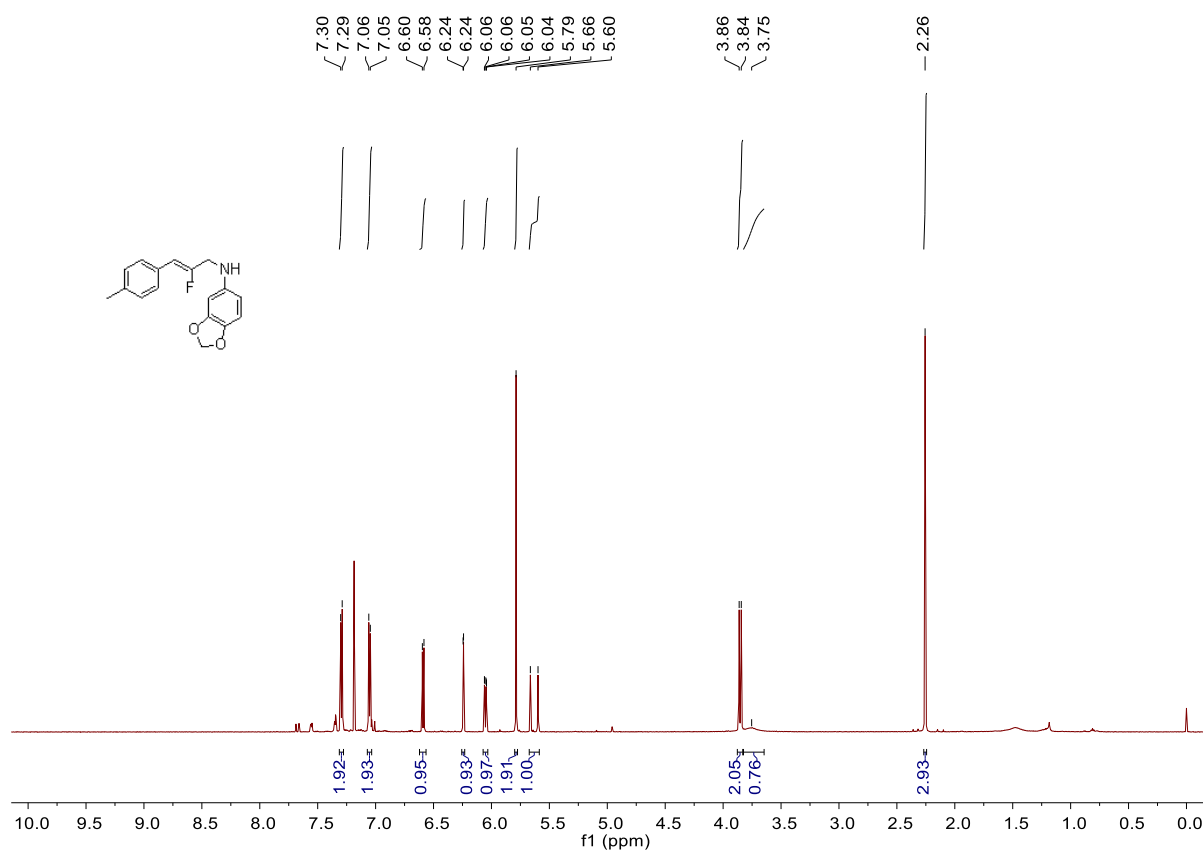

<sup>19</sup>F NMR (c27)

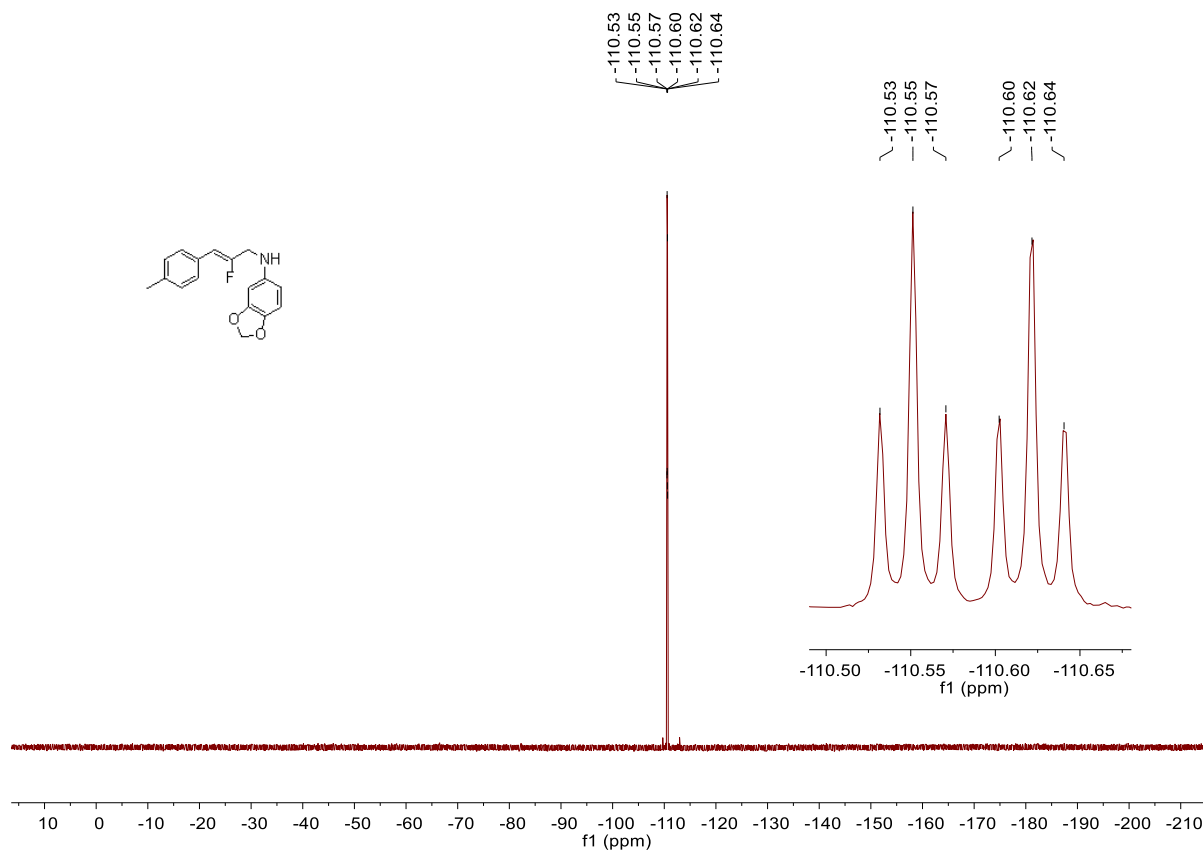

<sup>13</sup>C NMR (c27)

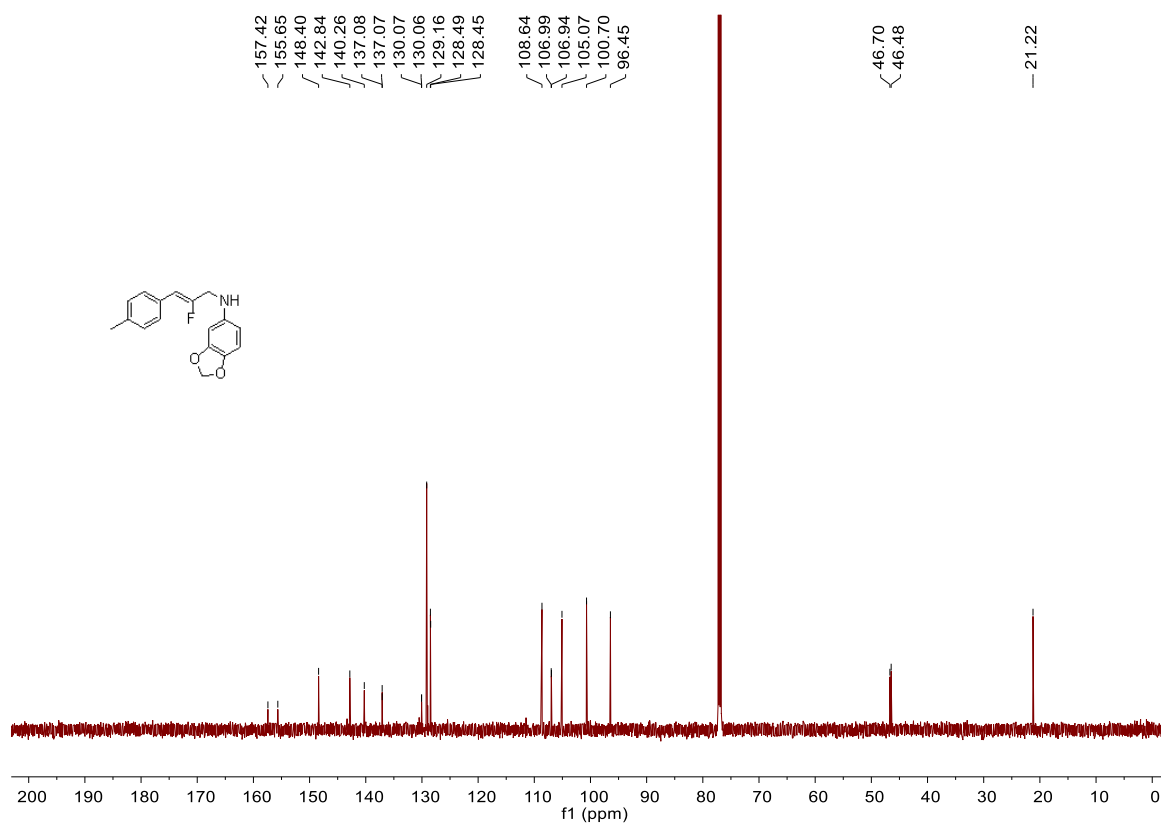

<sup>1</sup>H NMR (c28)

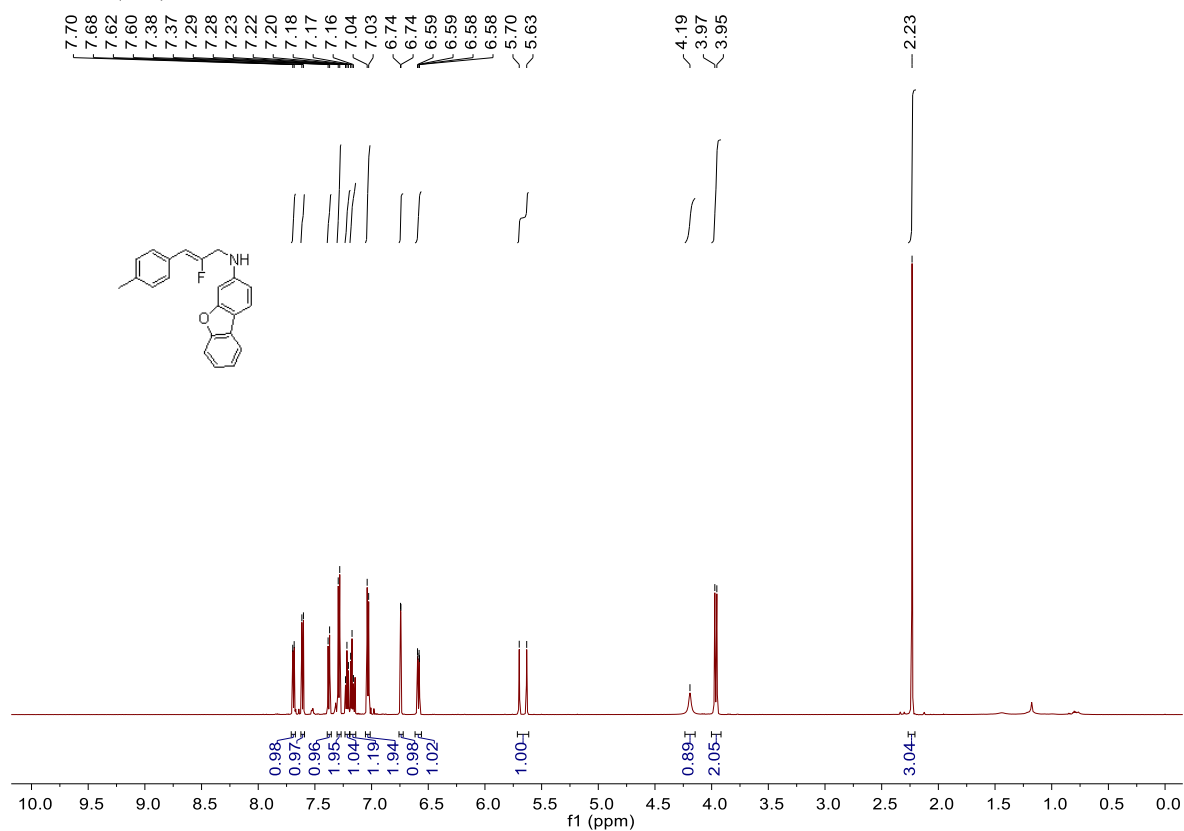

<sup>19</sup>F NMR (c28)

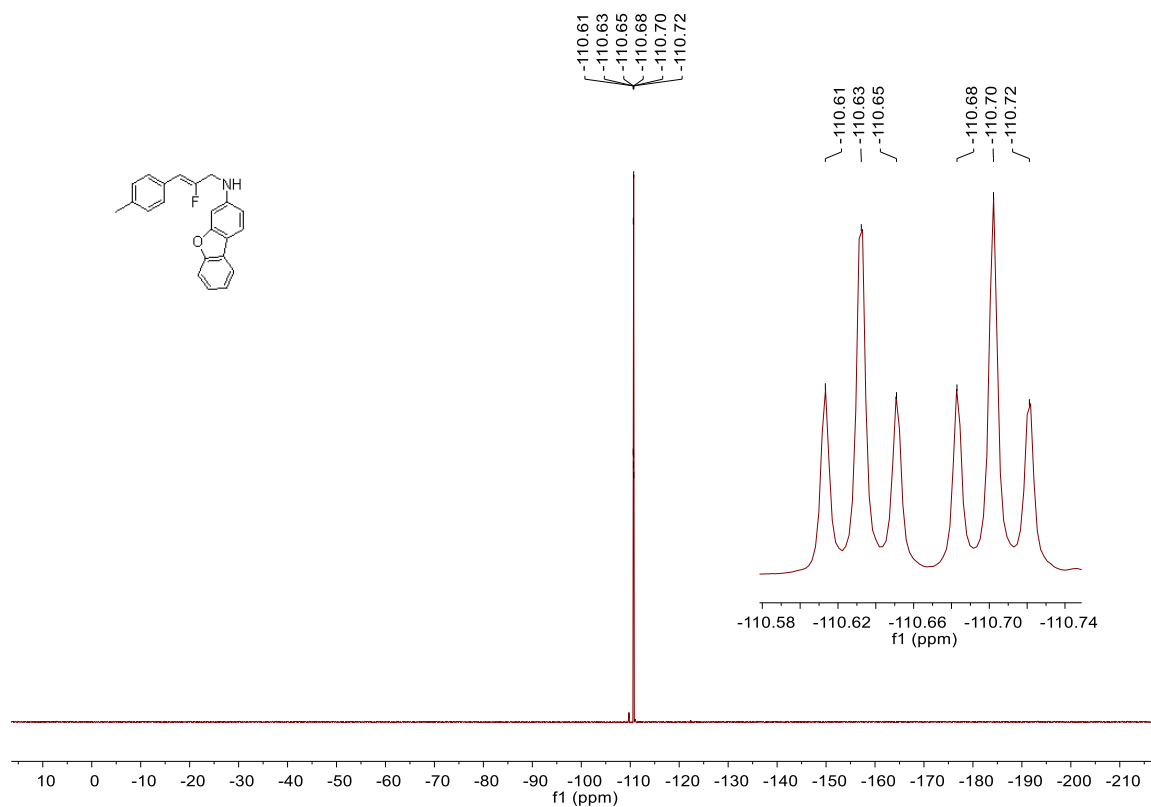

<sup>13</sup>C NMR (c28)

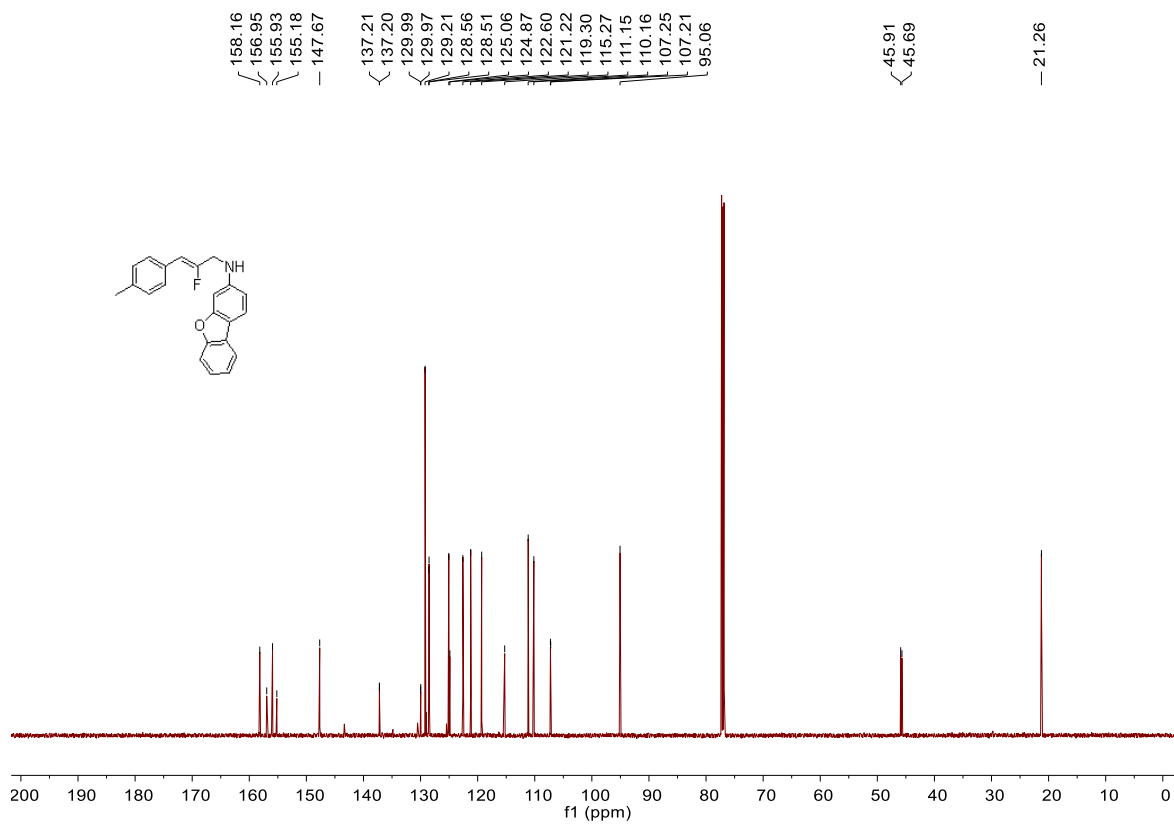

# <sup>1</sup>H NMR (c29)

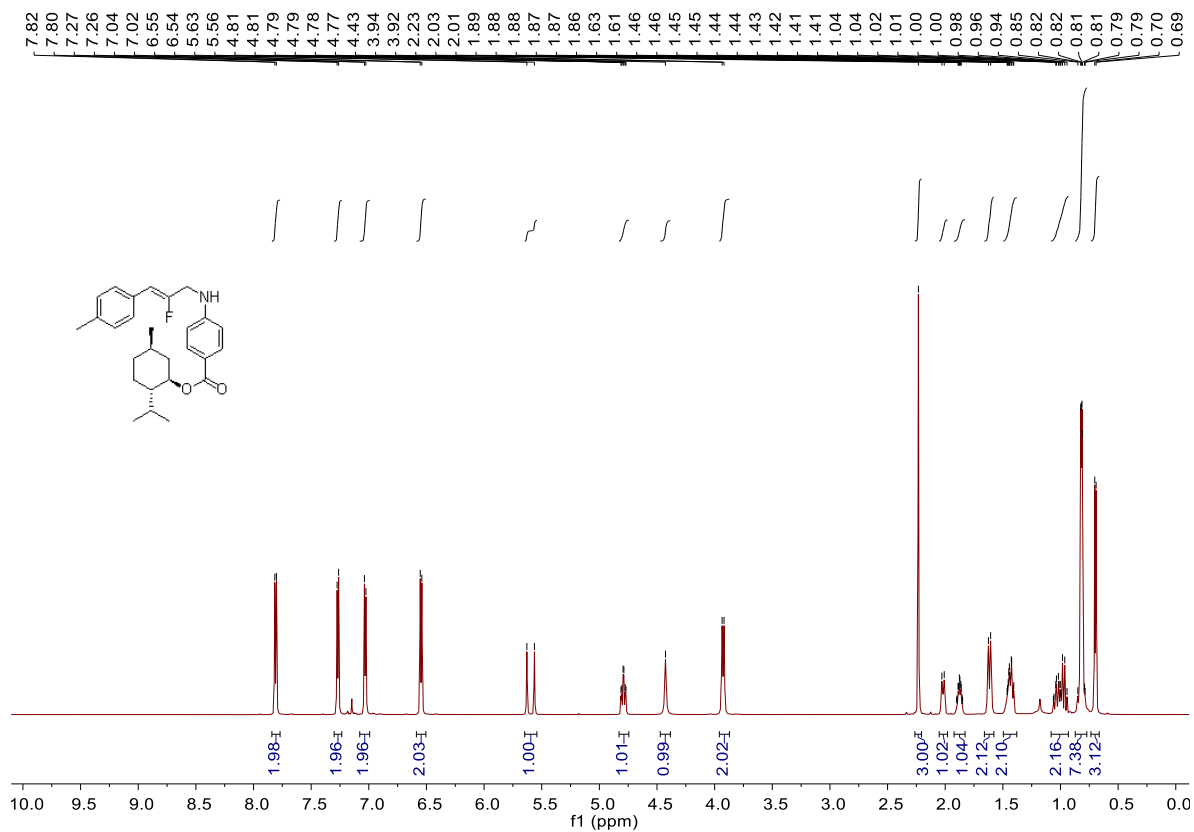

# <sup>19</sup>F NMR (c29)

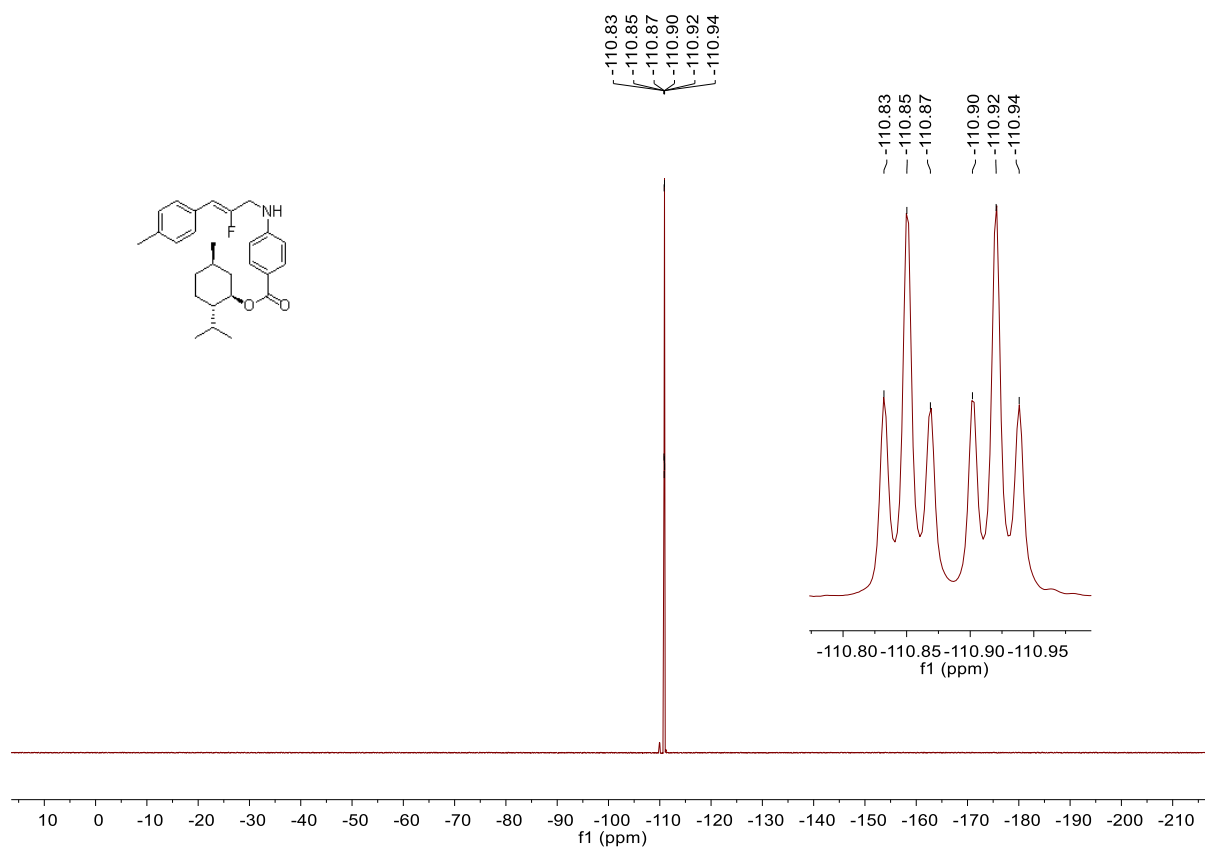

<sup>13</sup>C NMR (c29)

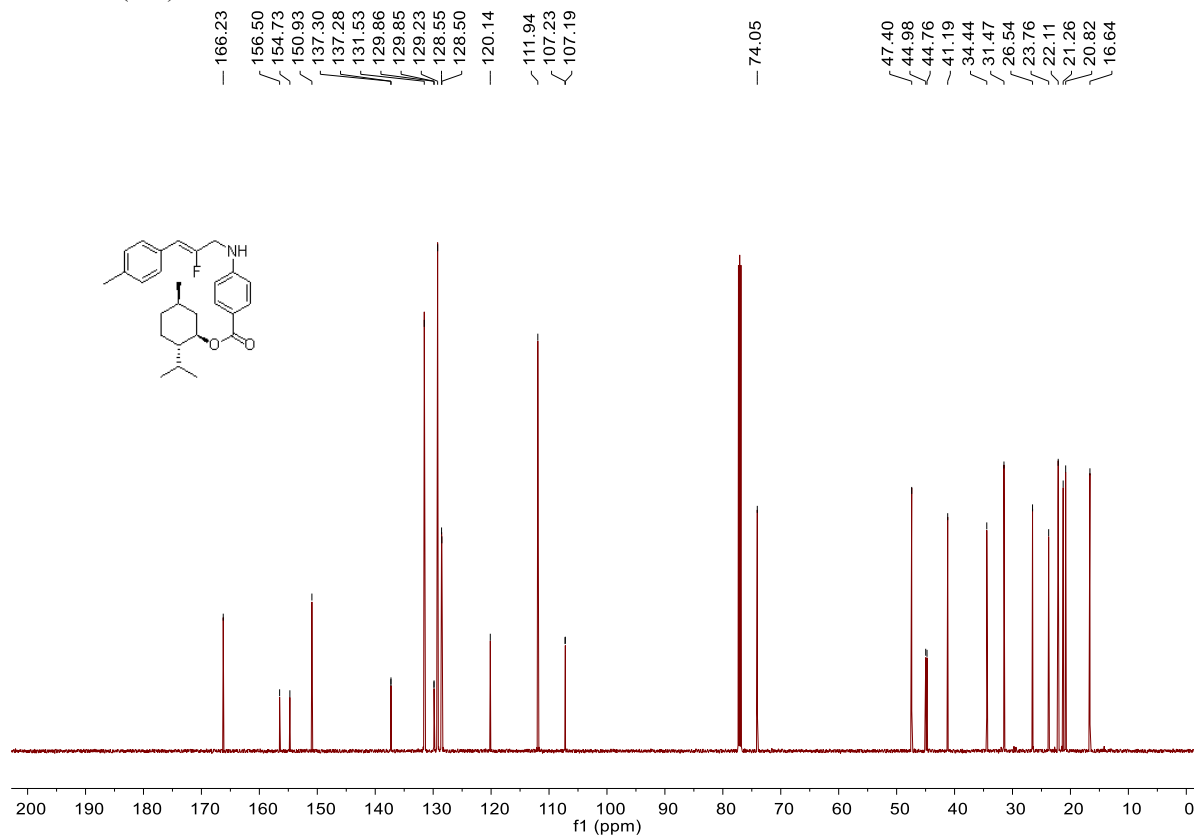

<sup>1</sup>H NMR (c30)

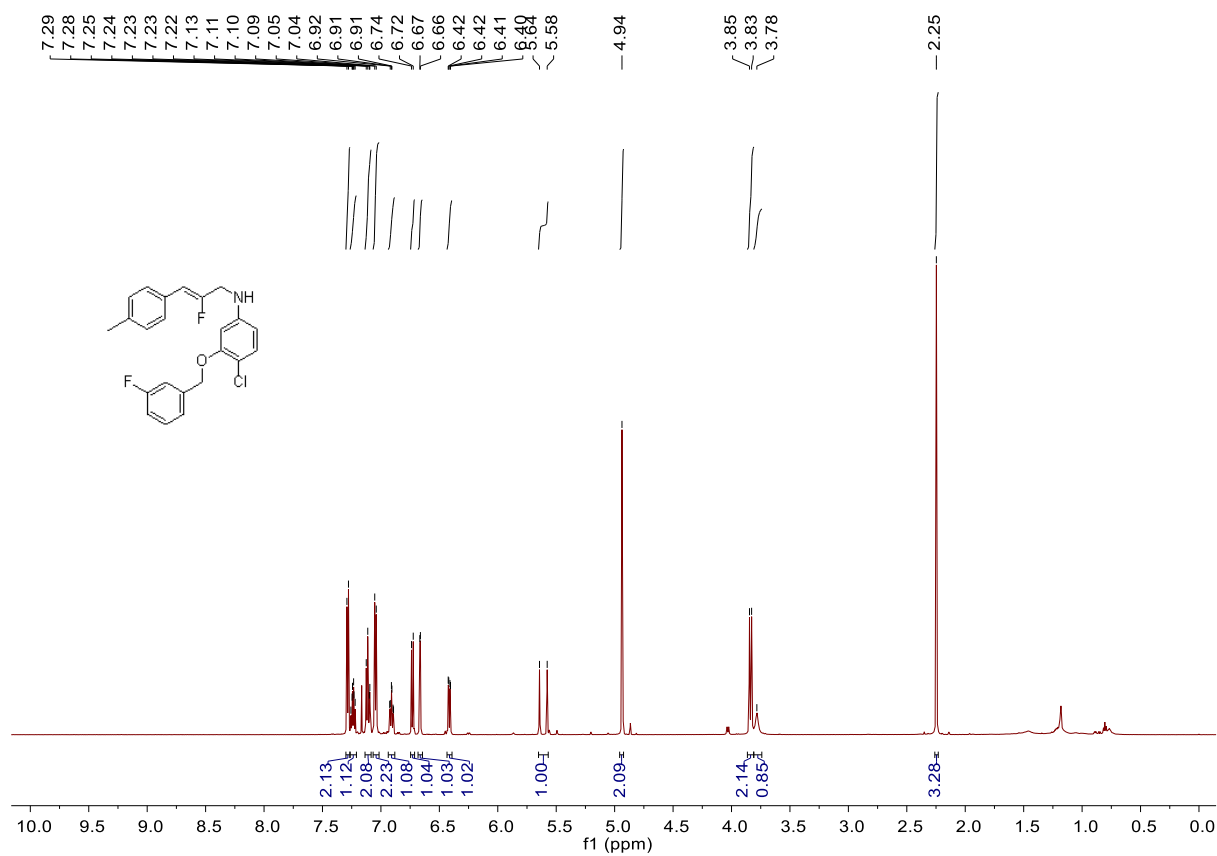

<sup>19</sup>F NMR (c30)

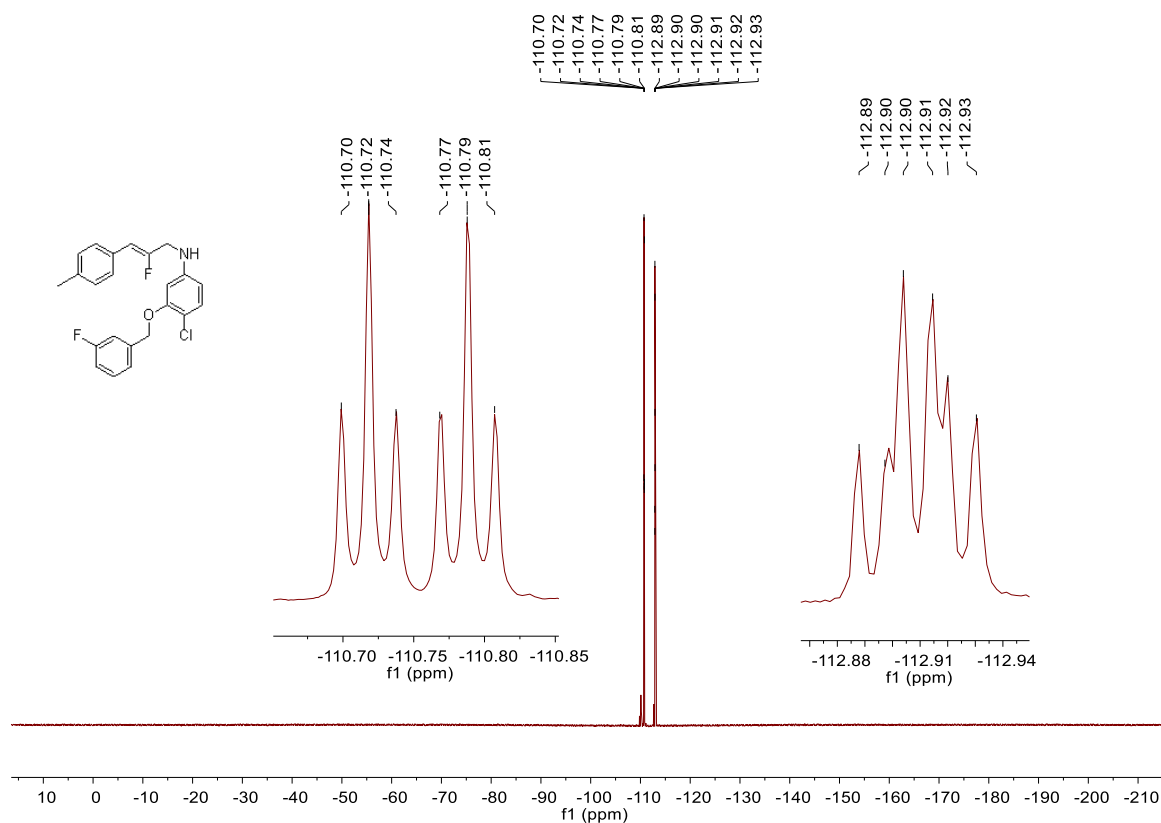

<sup>13</sup>C NMR (c30)

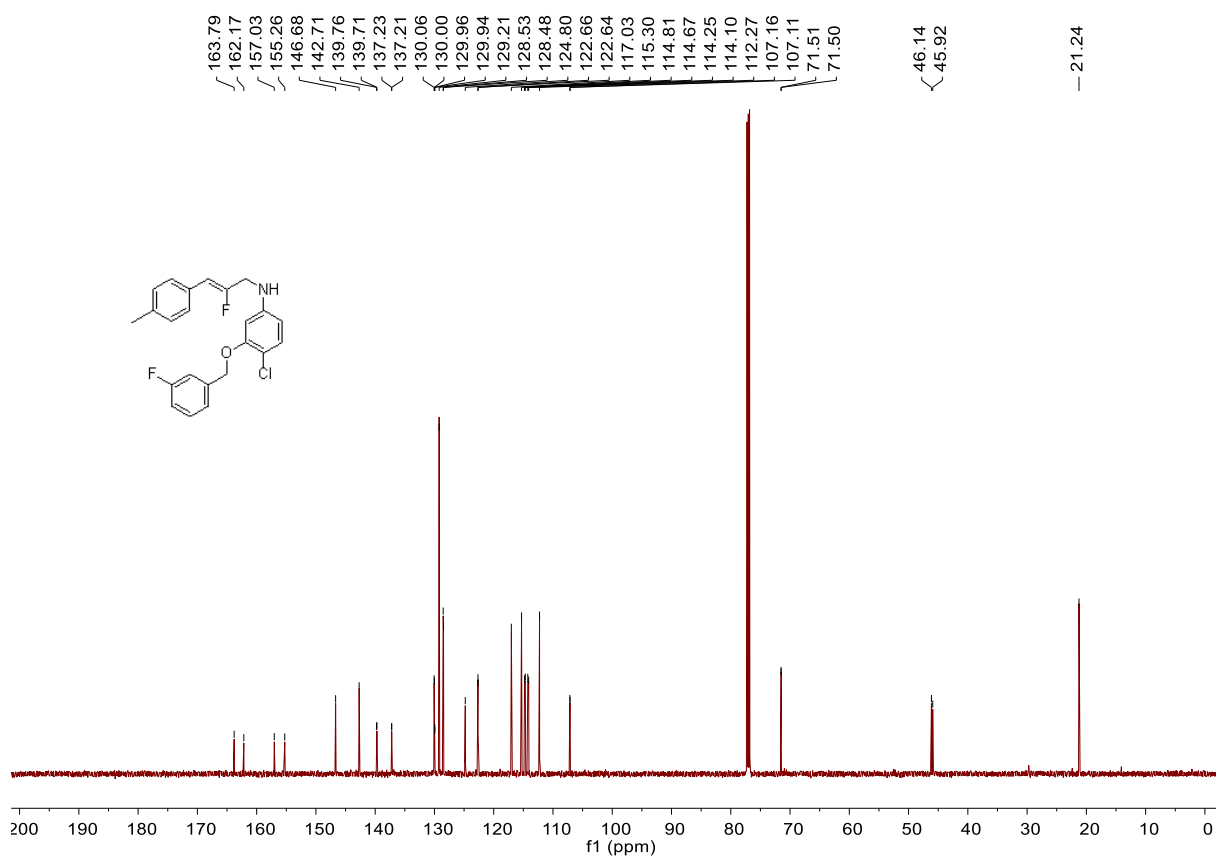

# <sup>1</sup>H NMR (c31)

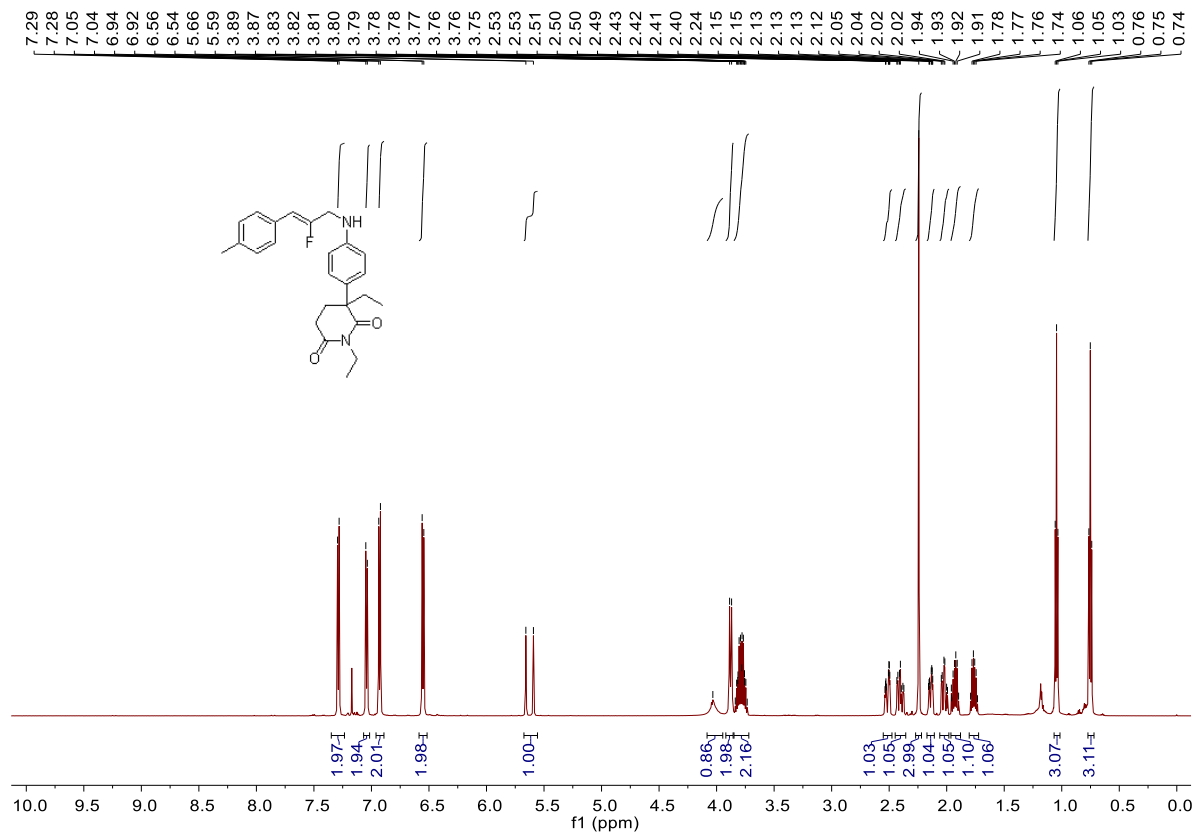

# <sup>19</sup>F NMR (c31)

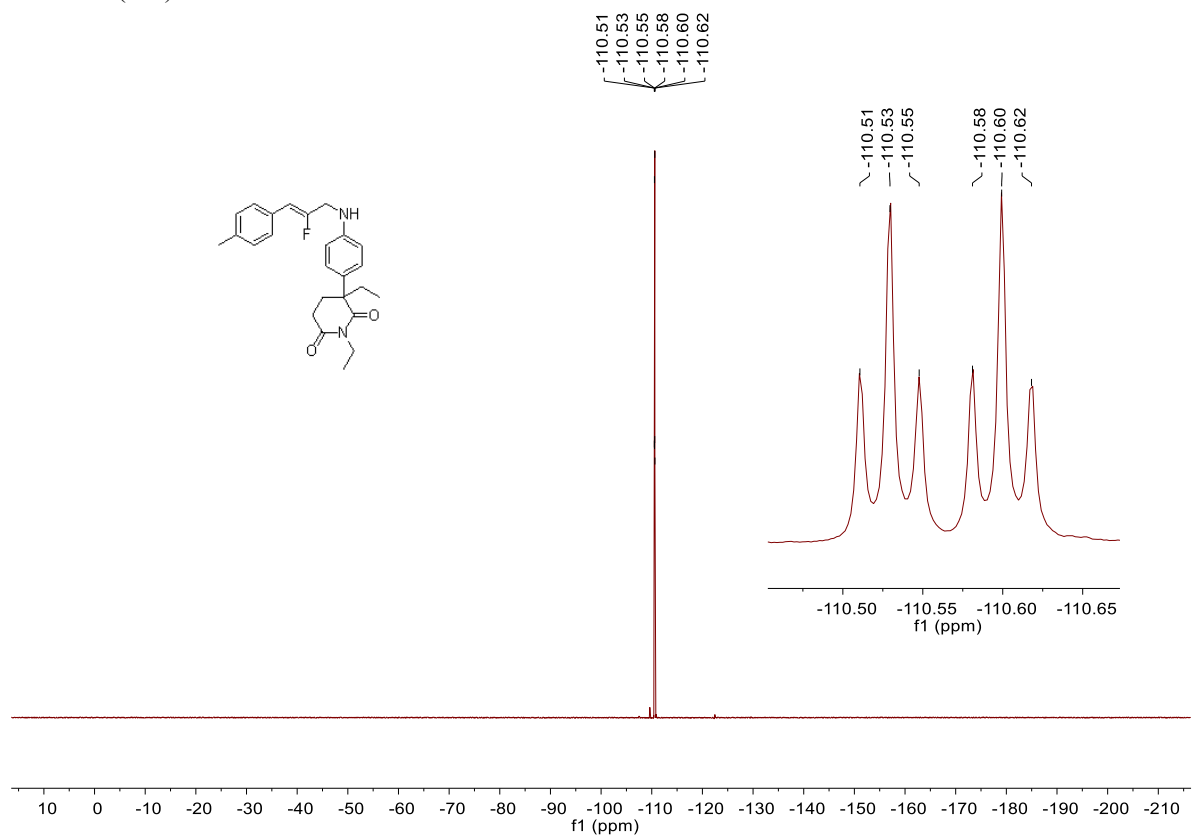



<sup>13</sup>C NMR (c31)

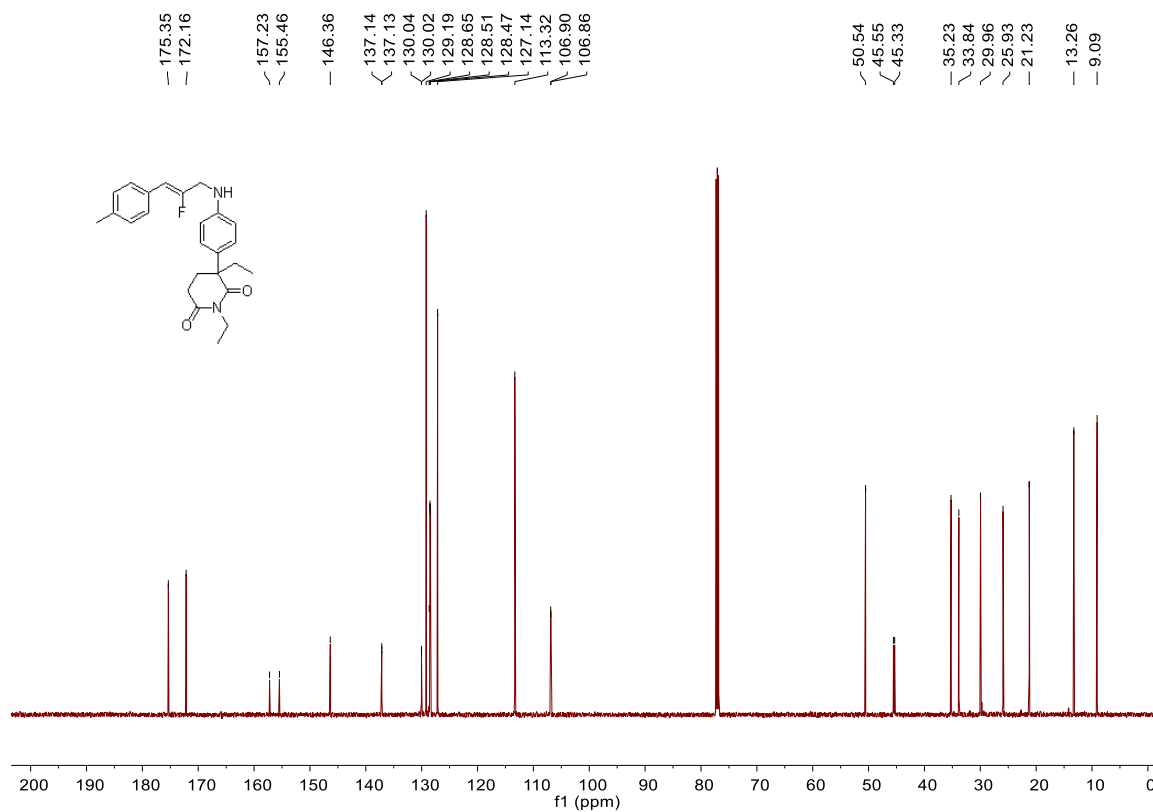

<sup>1</sup>H NMR (c32)

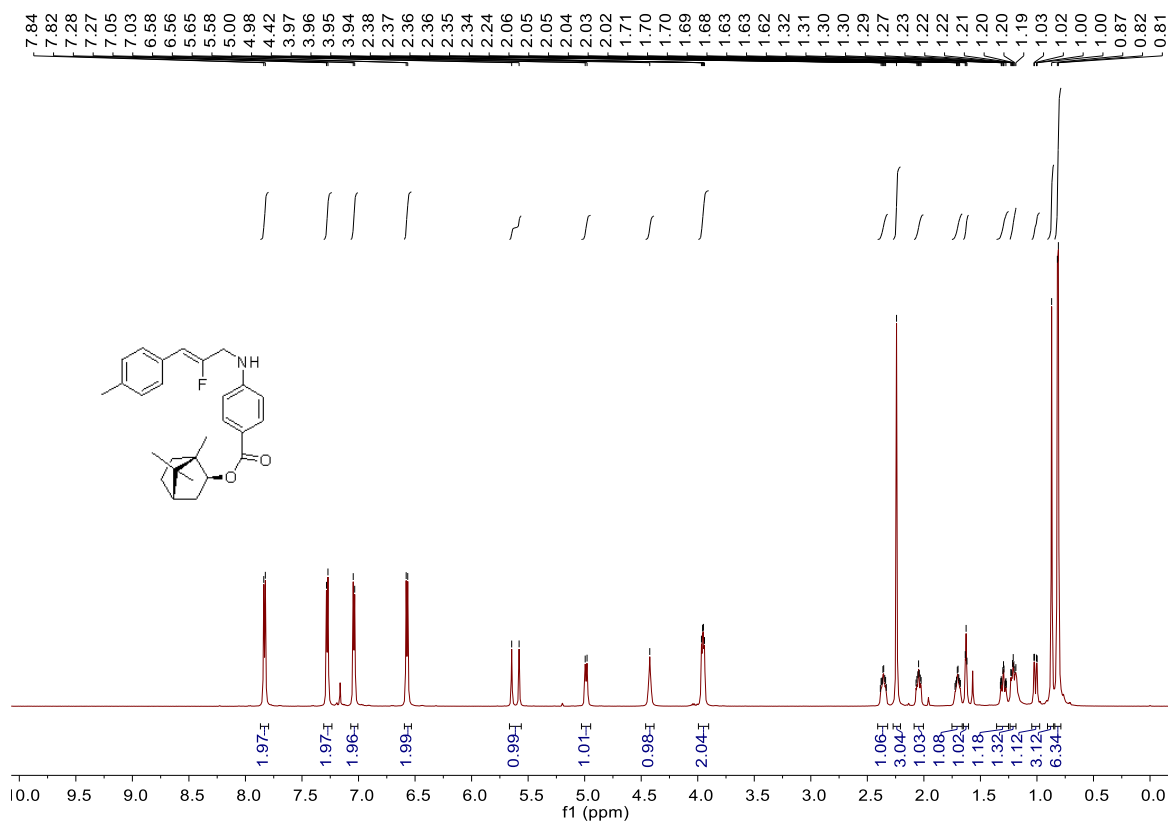

<sup>19</sup>F NMR (c32)

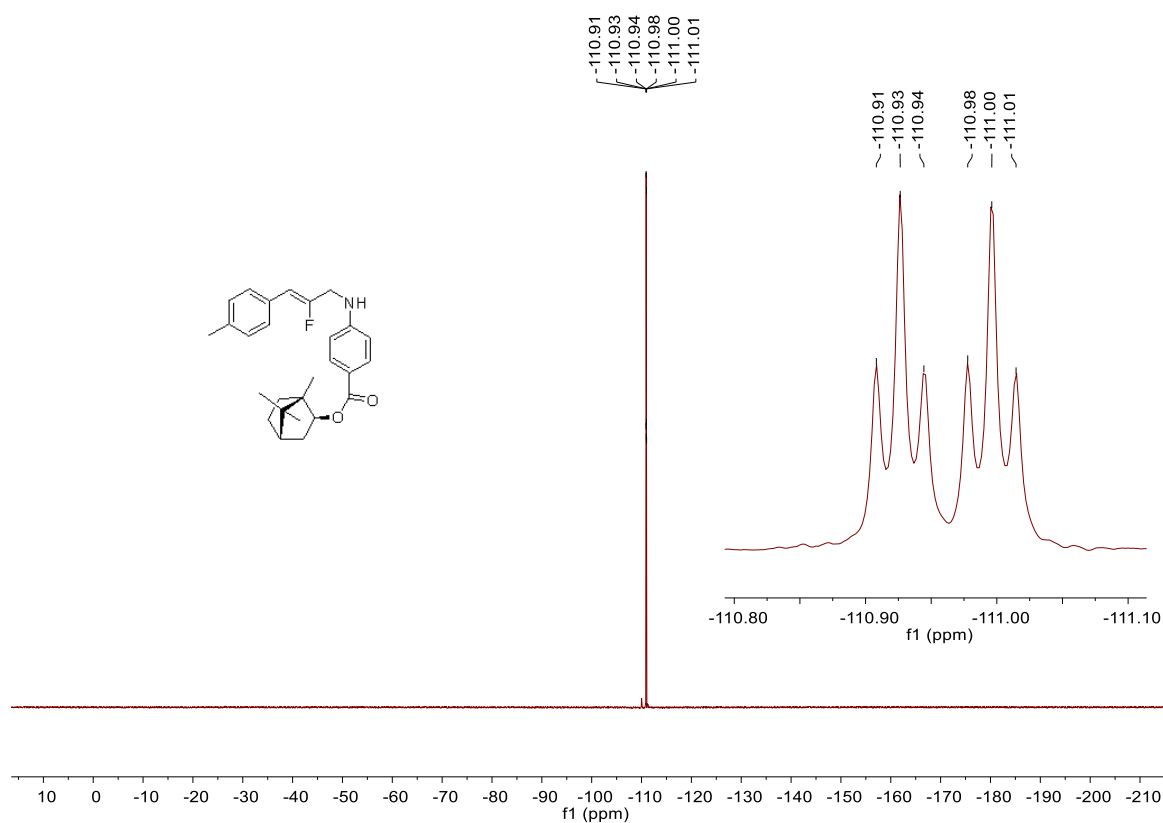

<sup>13</sup>C NMR (c32)

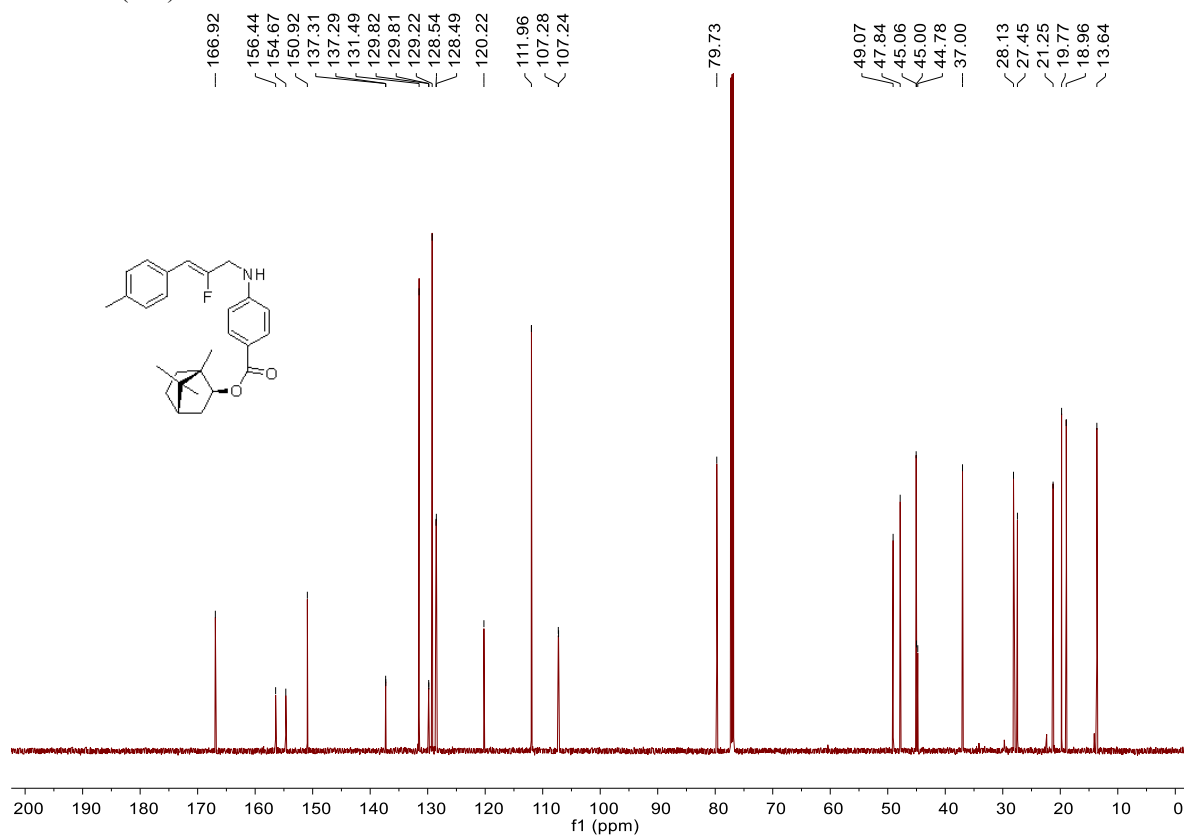

<sup>1</sup>H NMR (c33)

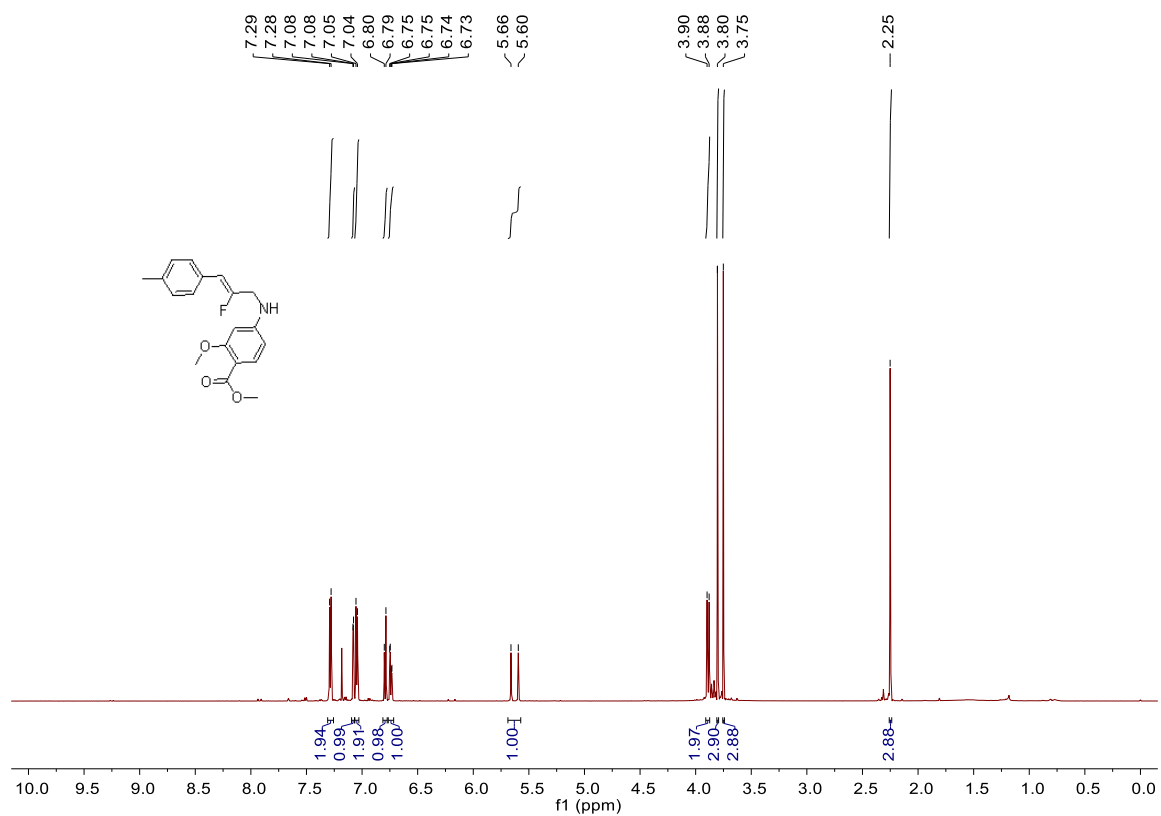

<sup>19</sup>F NMR (c33)

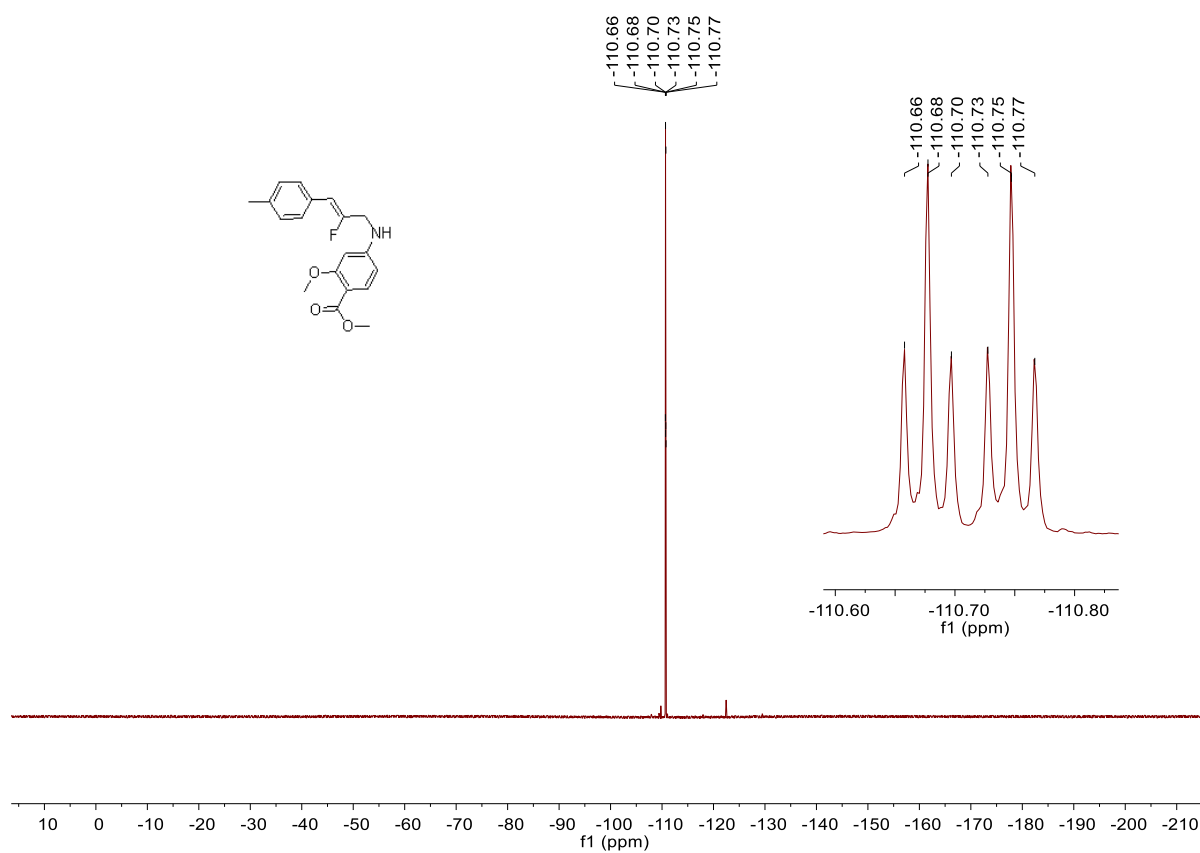

<sup>13</sup>C NMR (c33)

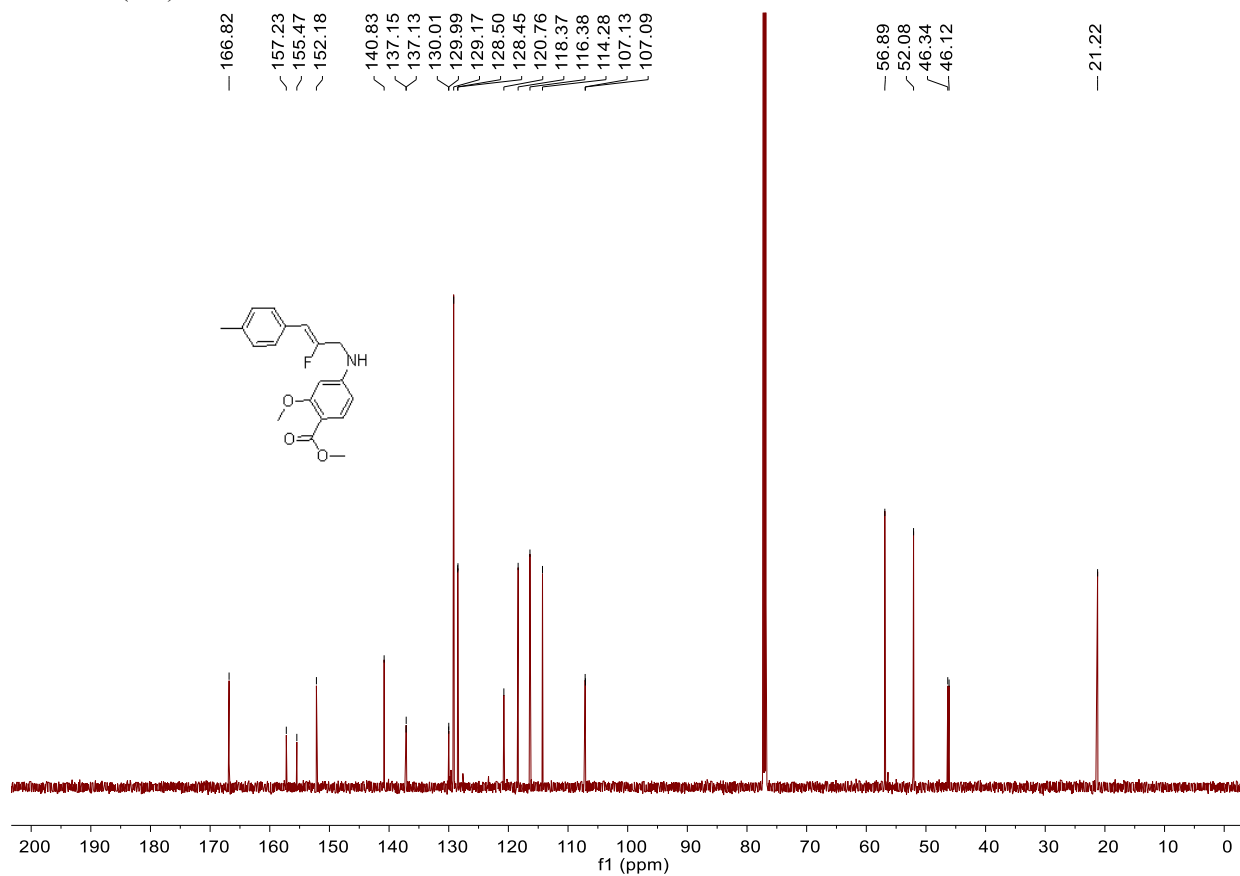

<sup>1</sup>H NMR (d1)

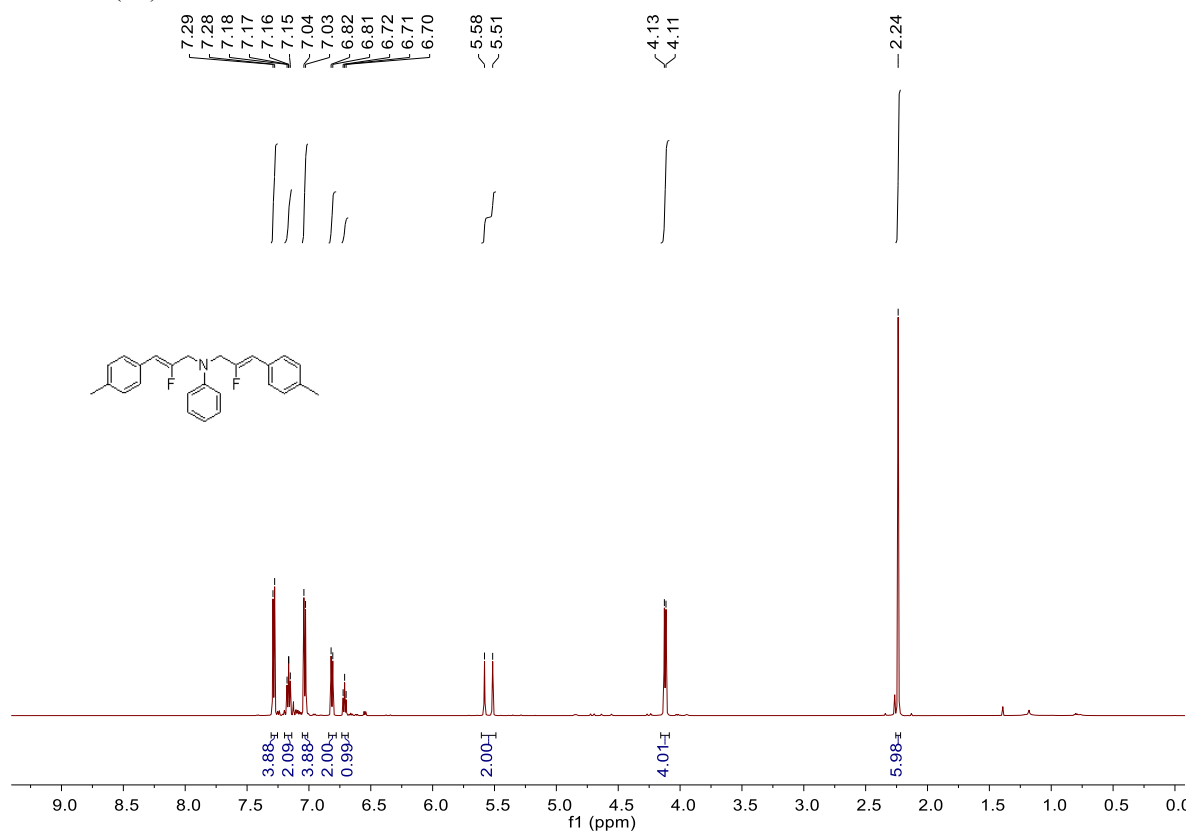

<sup>19</sup>F NMR (d1)

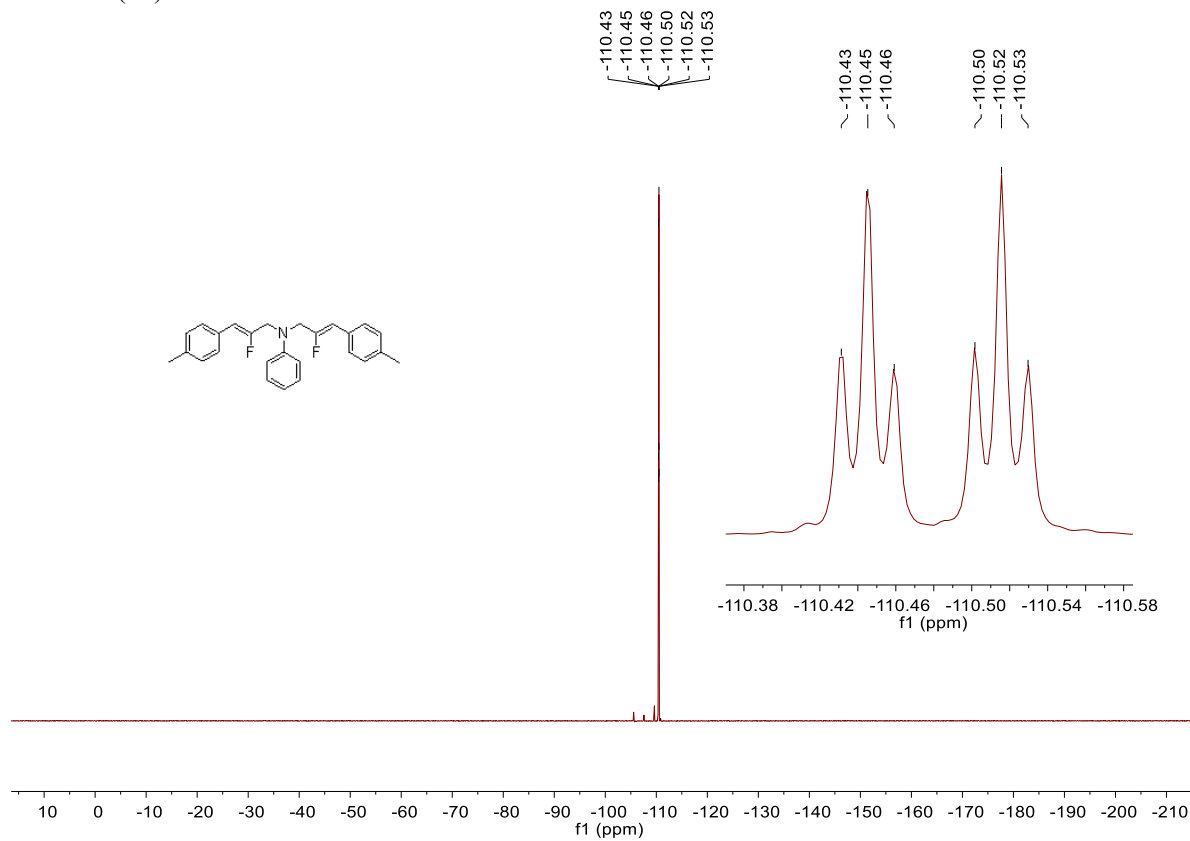

<sup>13</sup>C NMR (d1)

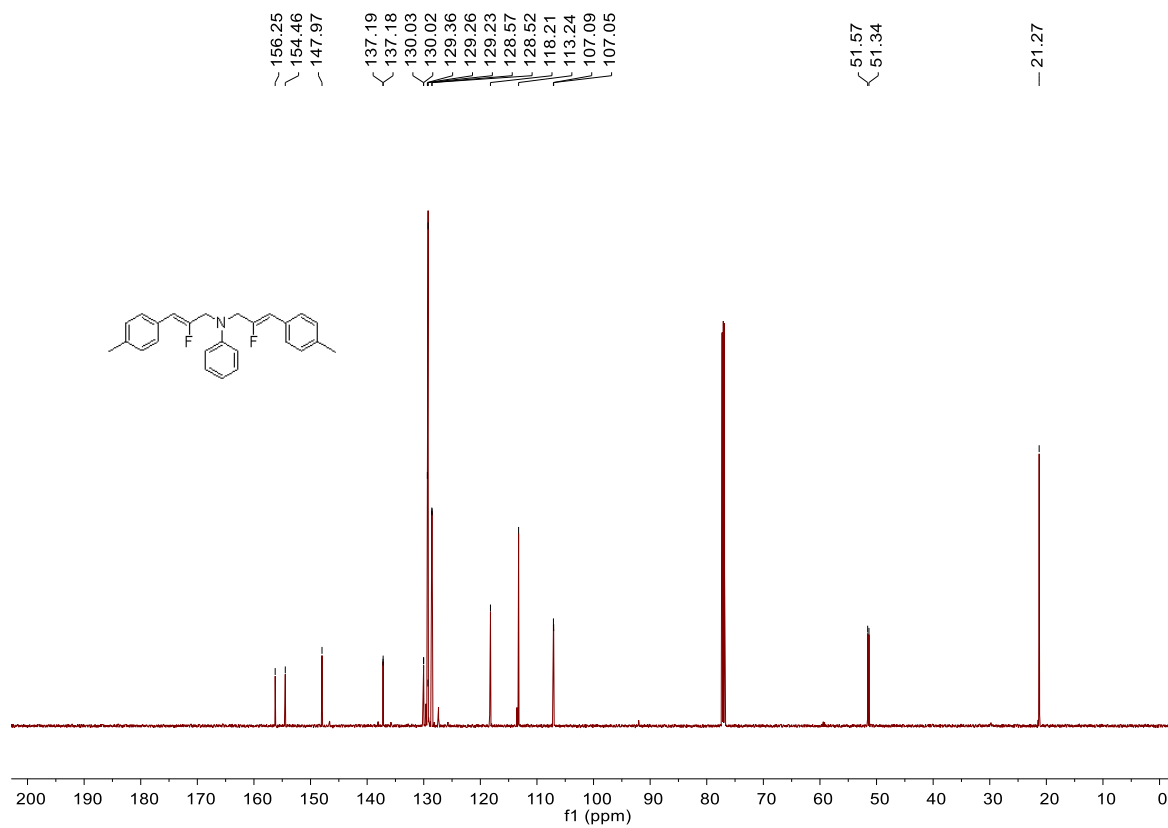

<sup>1</sup>H NMR (d2)

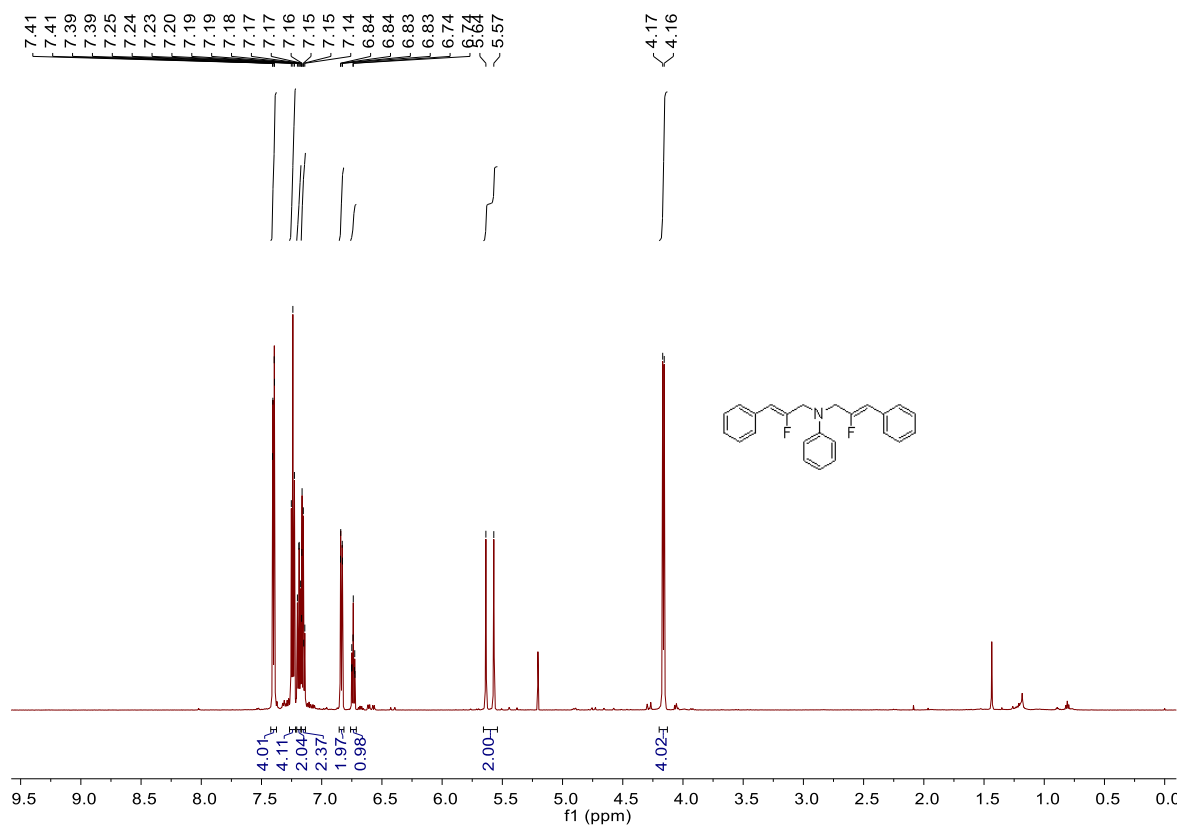

<sup>19</sup>F NMR (d2)

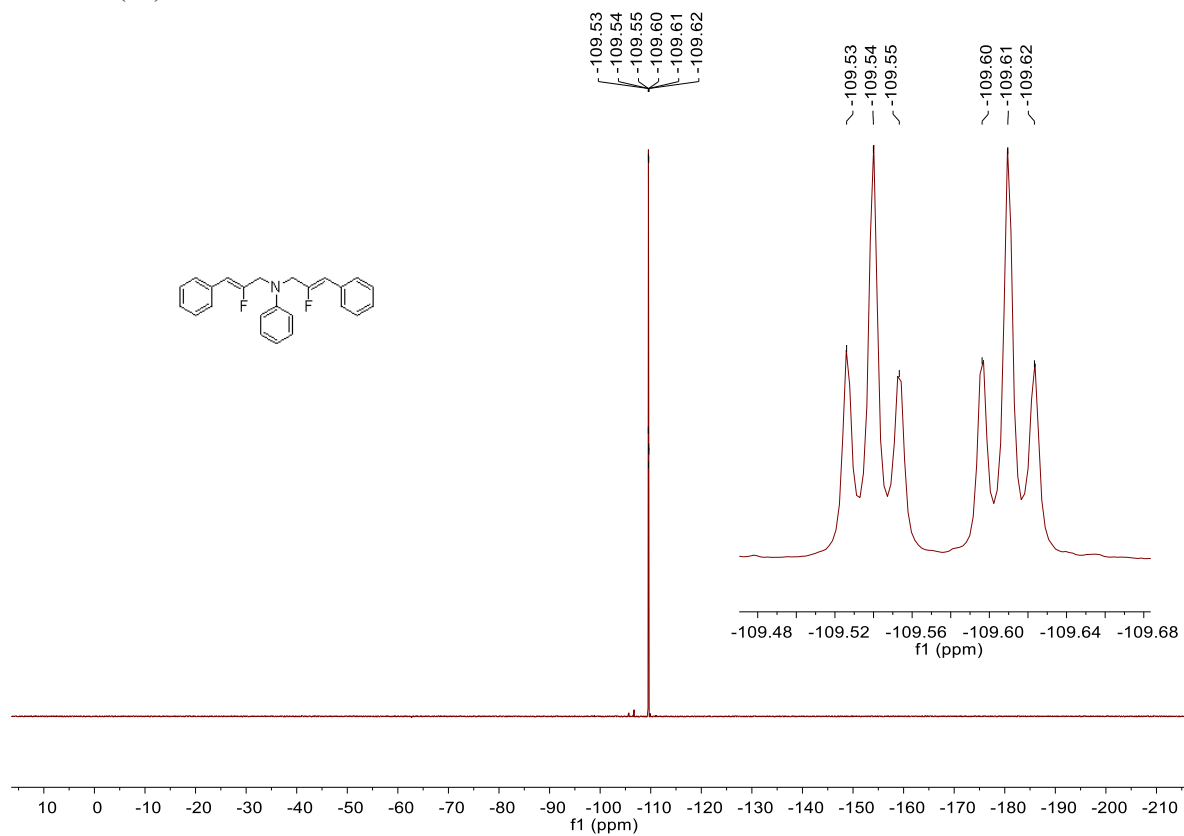

<sup>13</sup>C NMR (d2)

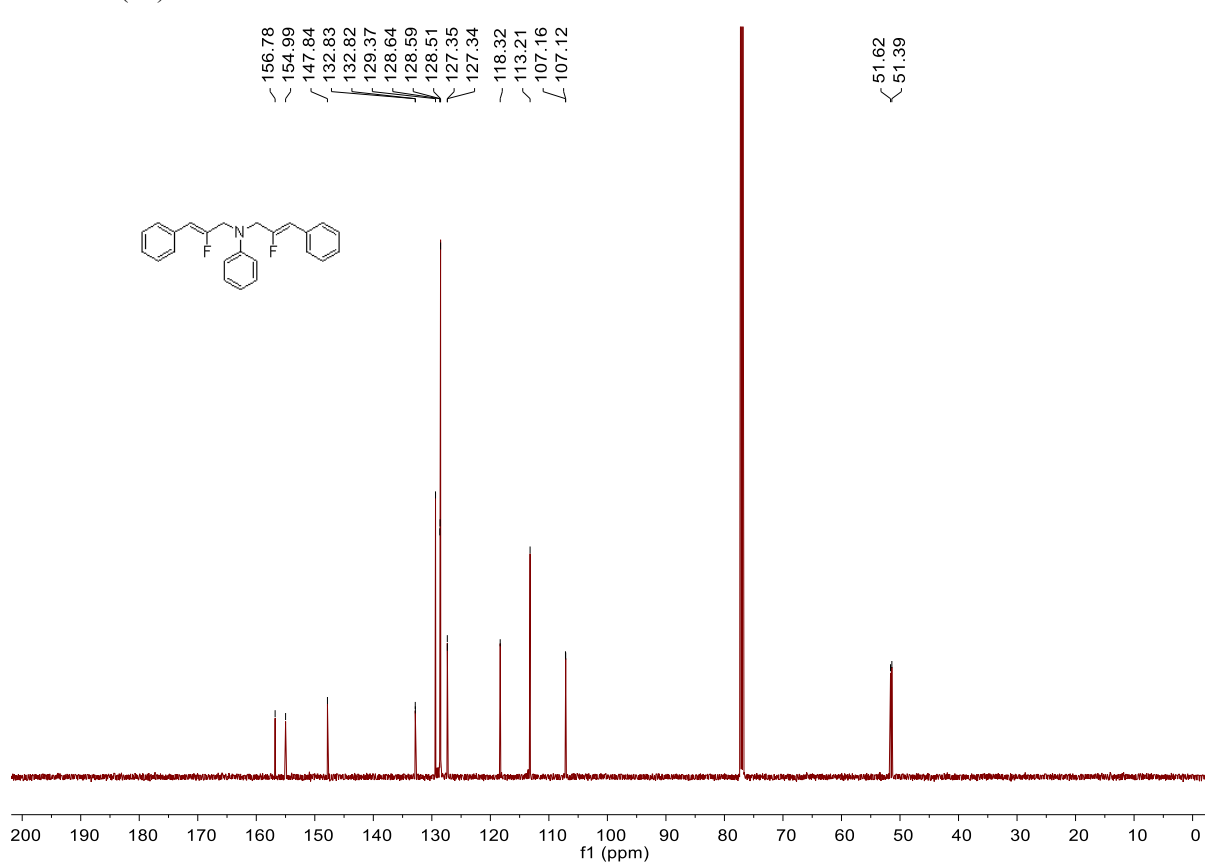

<sup>1</sup>H NMR (d3)

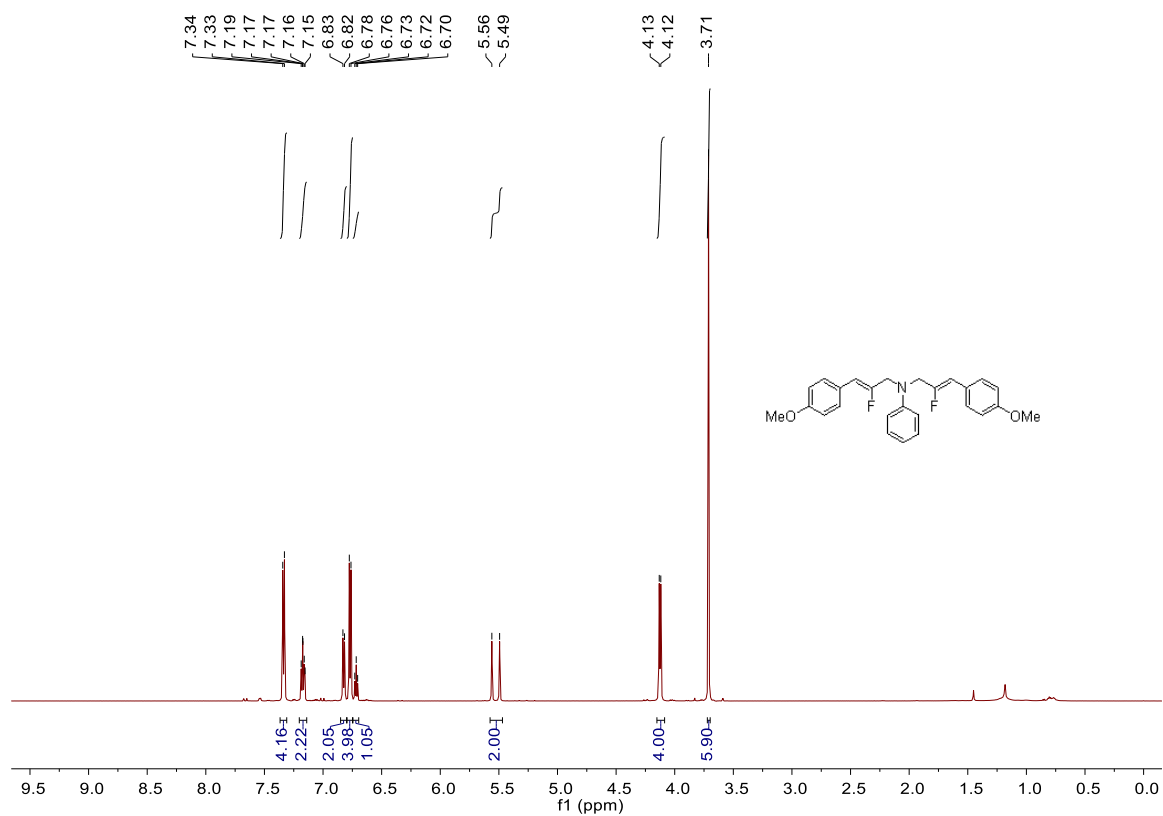

<sup>19</sup>F NMR (d3)

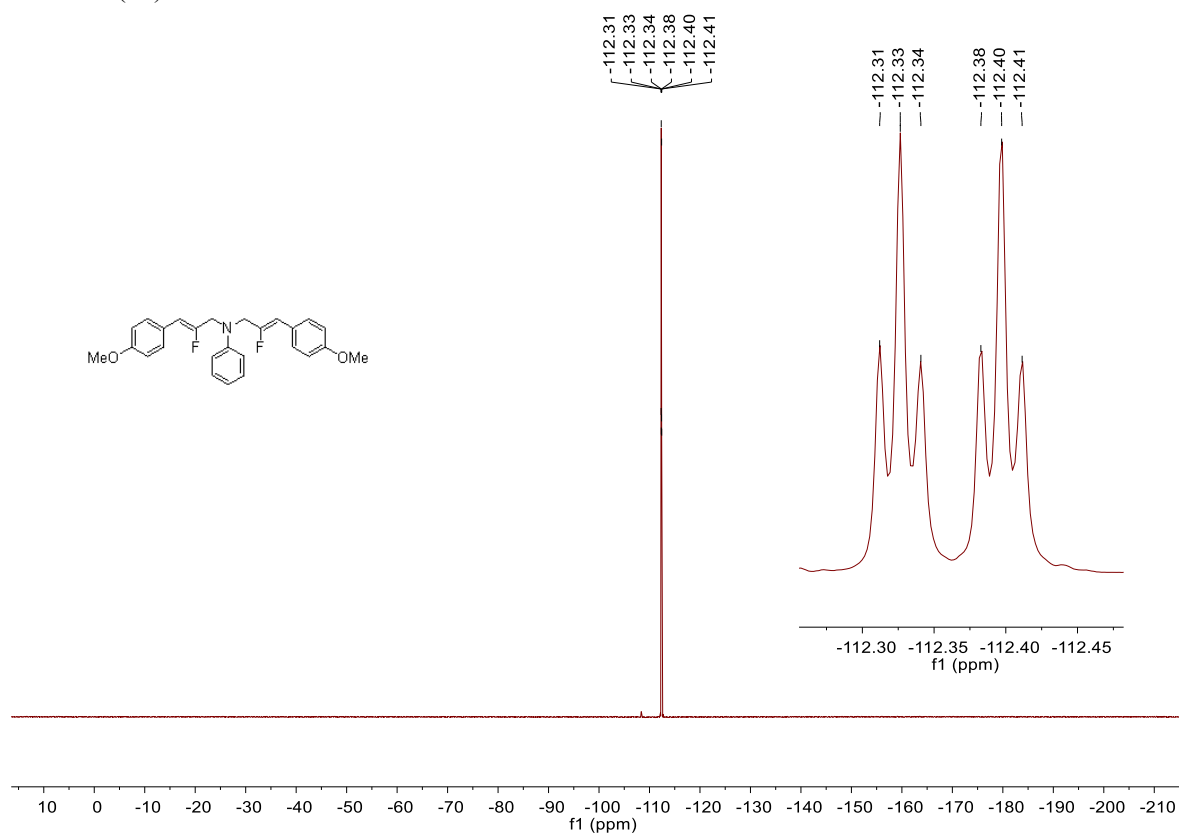



<sup>13</sup>C NMR (d3)

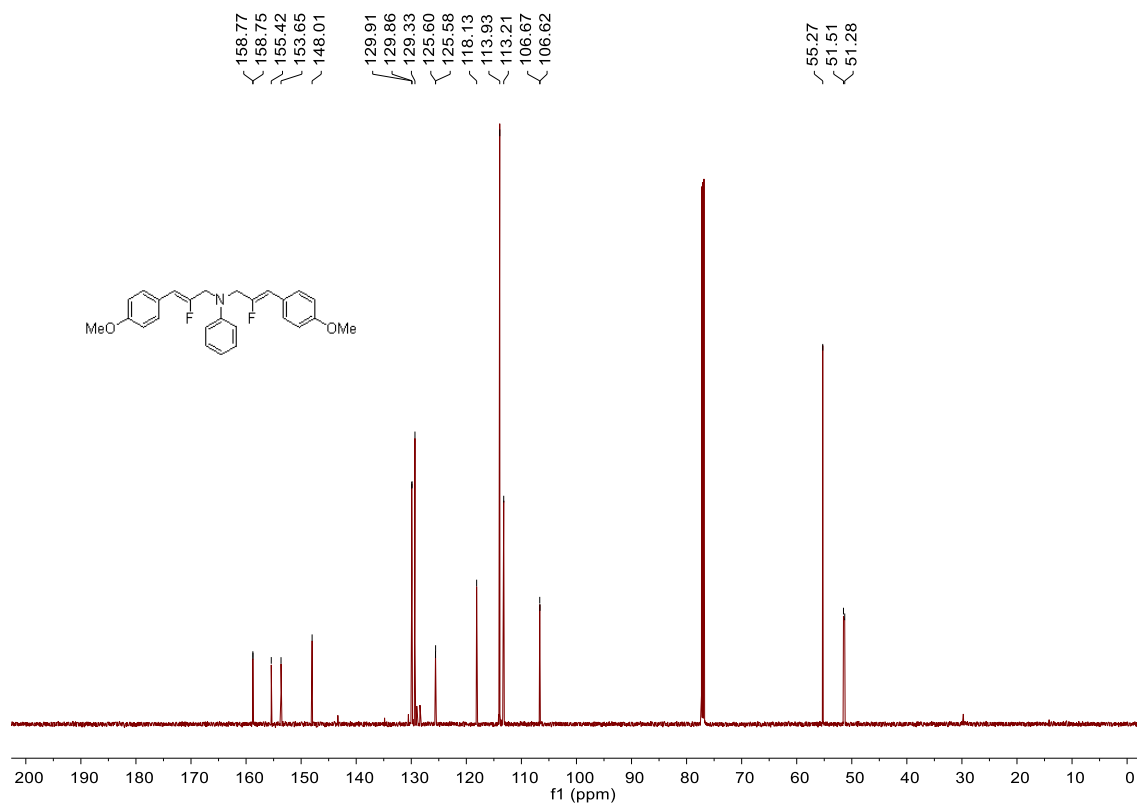

<sup>1</sup>H NMR (d4)

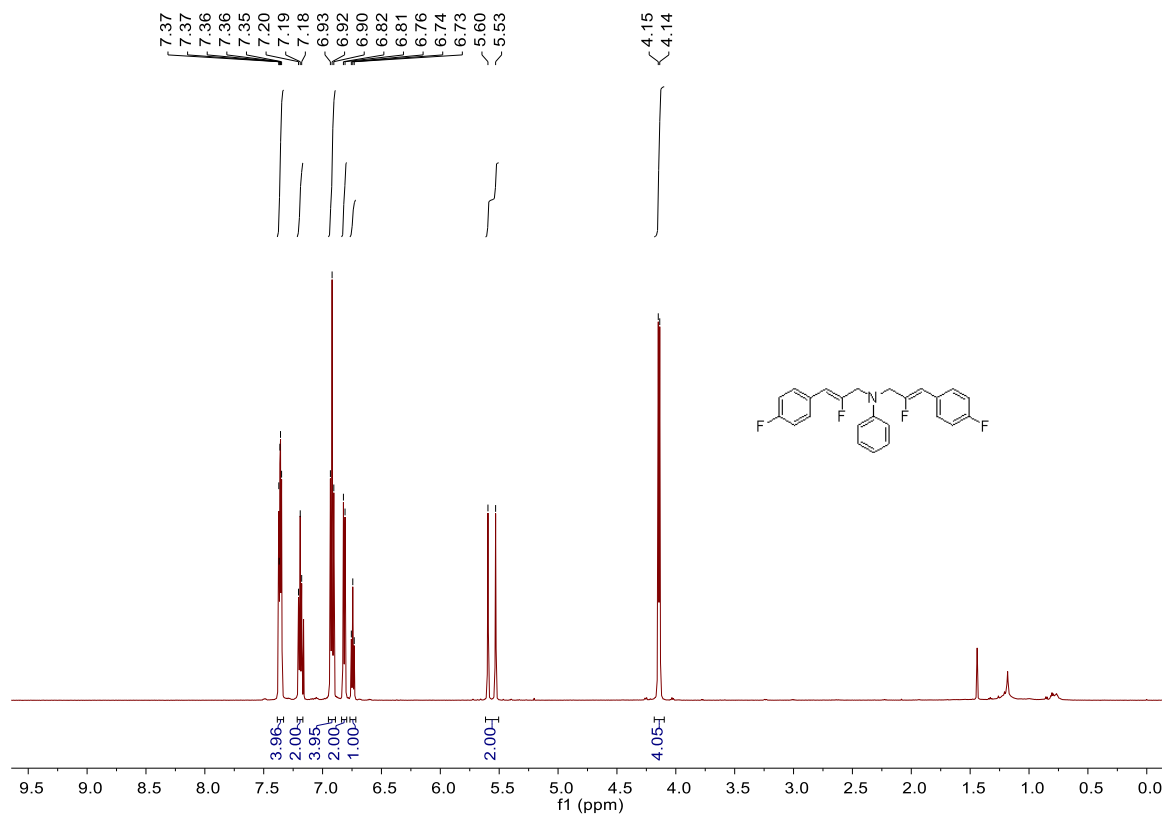

### <sup>19</sup>F NMR (d4)

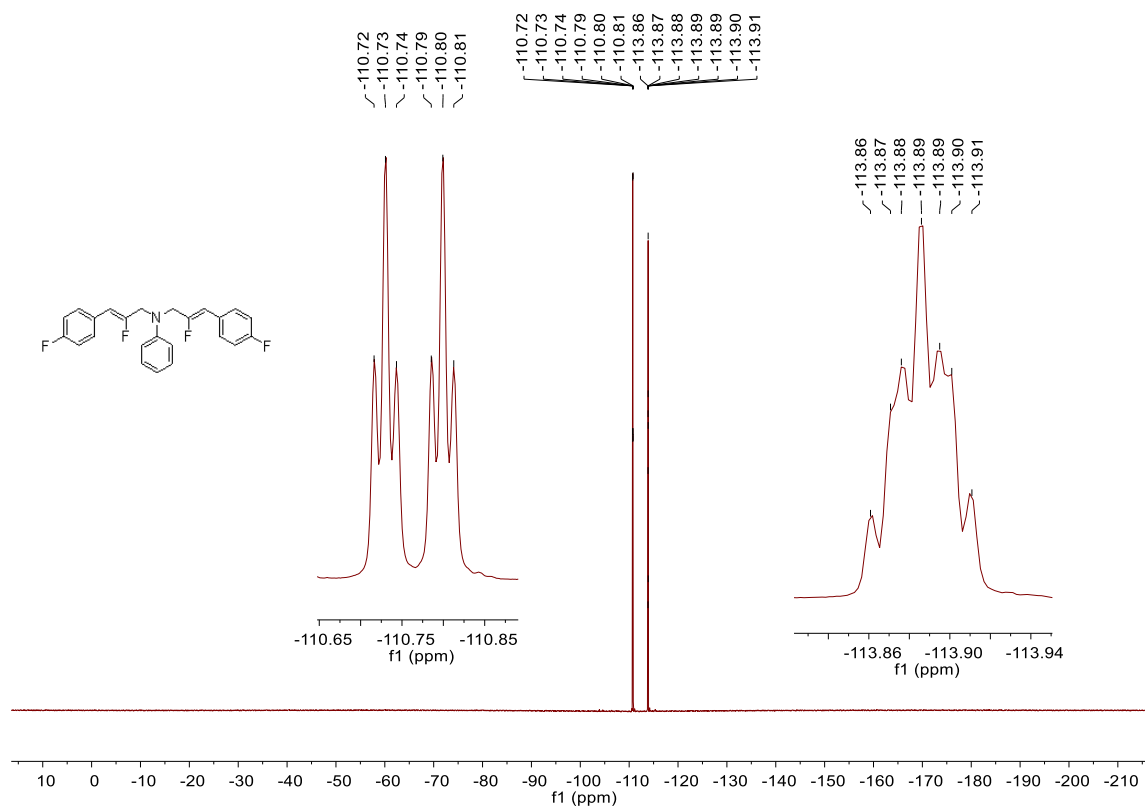

### <sup>13</sup>C NMR (d4)

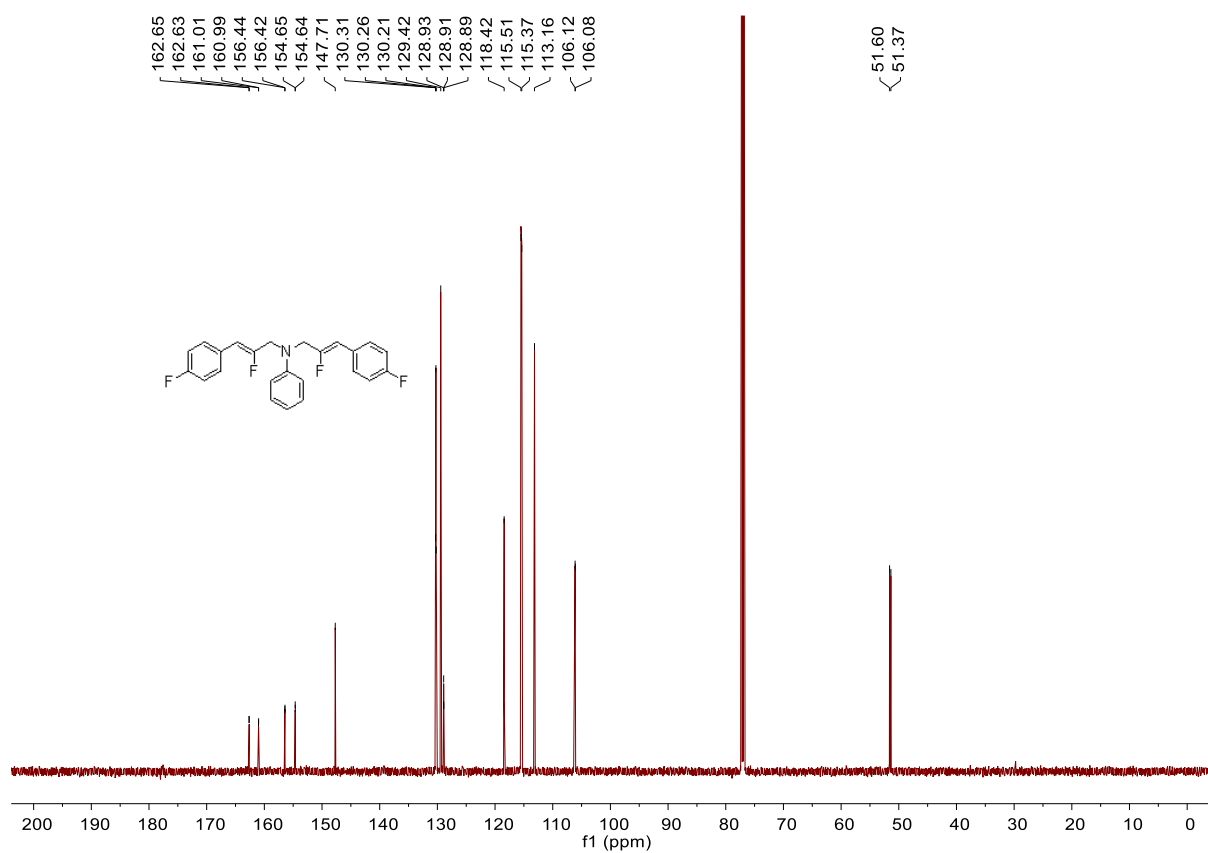

<sup>1</sup>H NMR (d5)

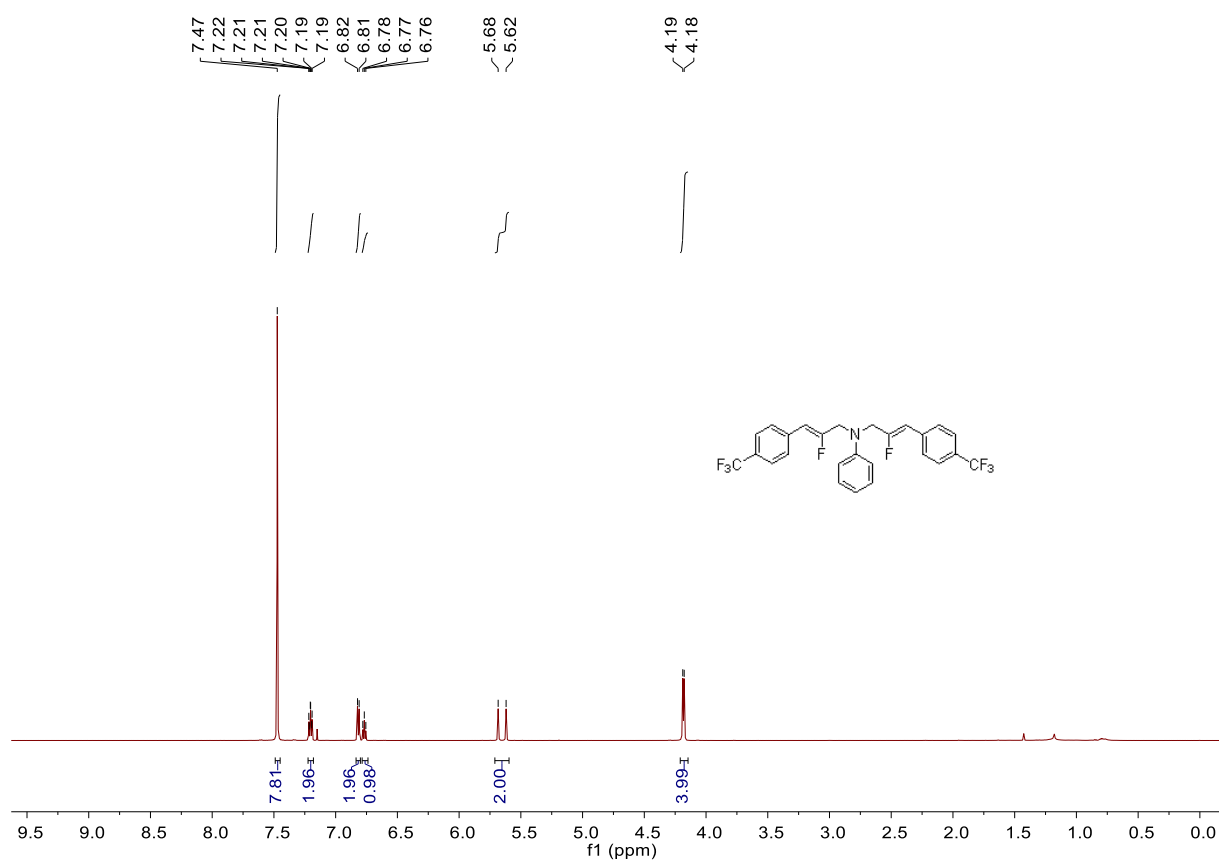

<sup>19</sup>F NMR (d5)

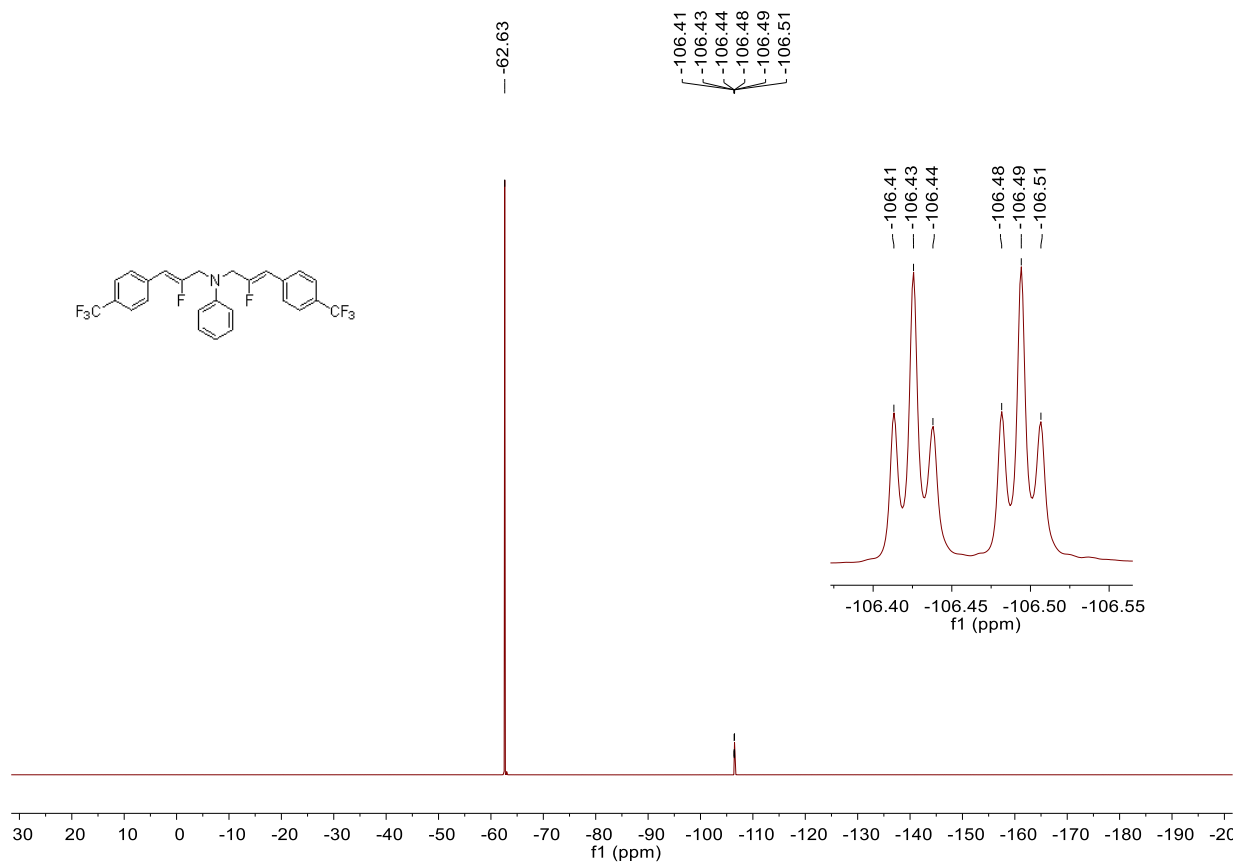

<sup>13</sup>C NMR (d5)

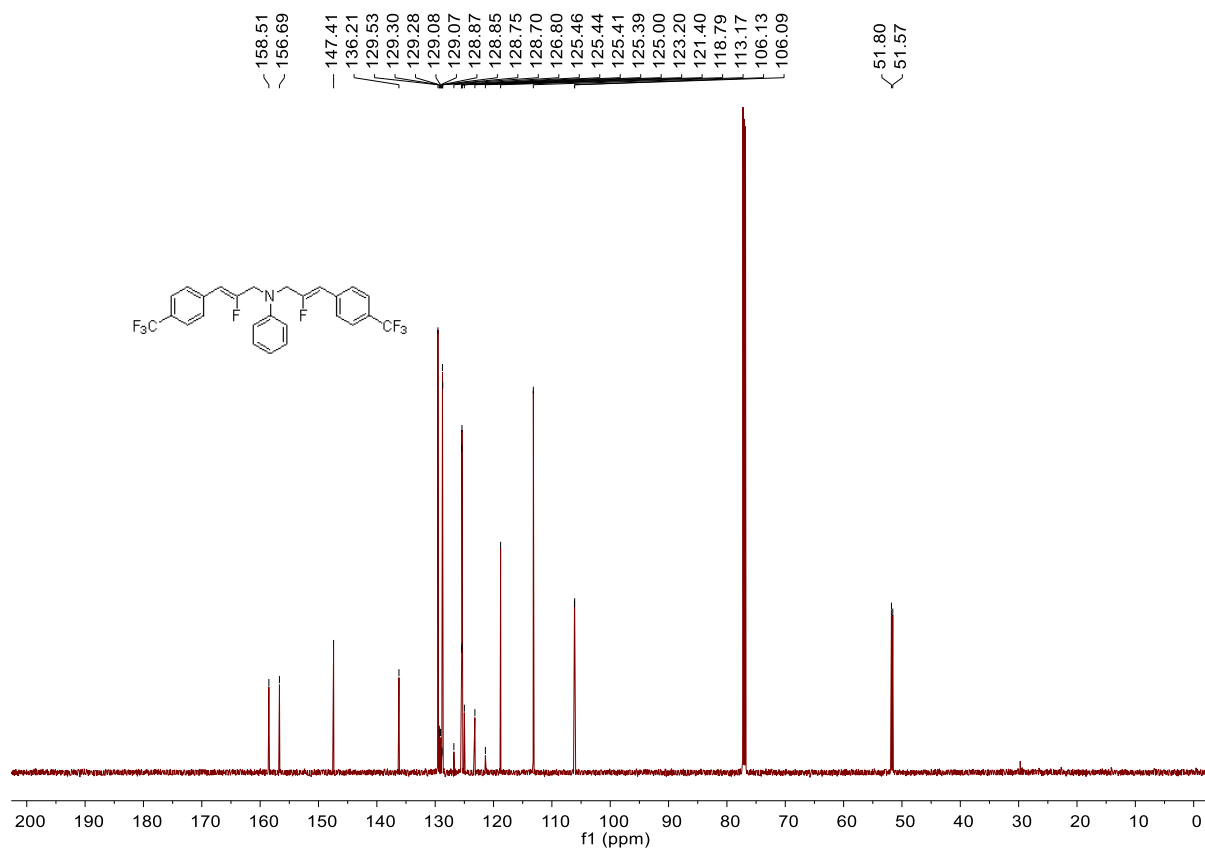

<sup>1</sup>H NMR (d6)

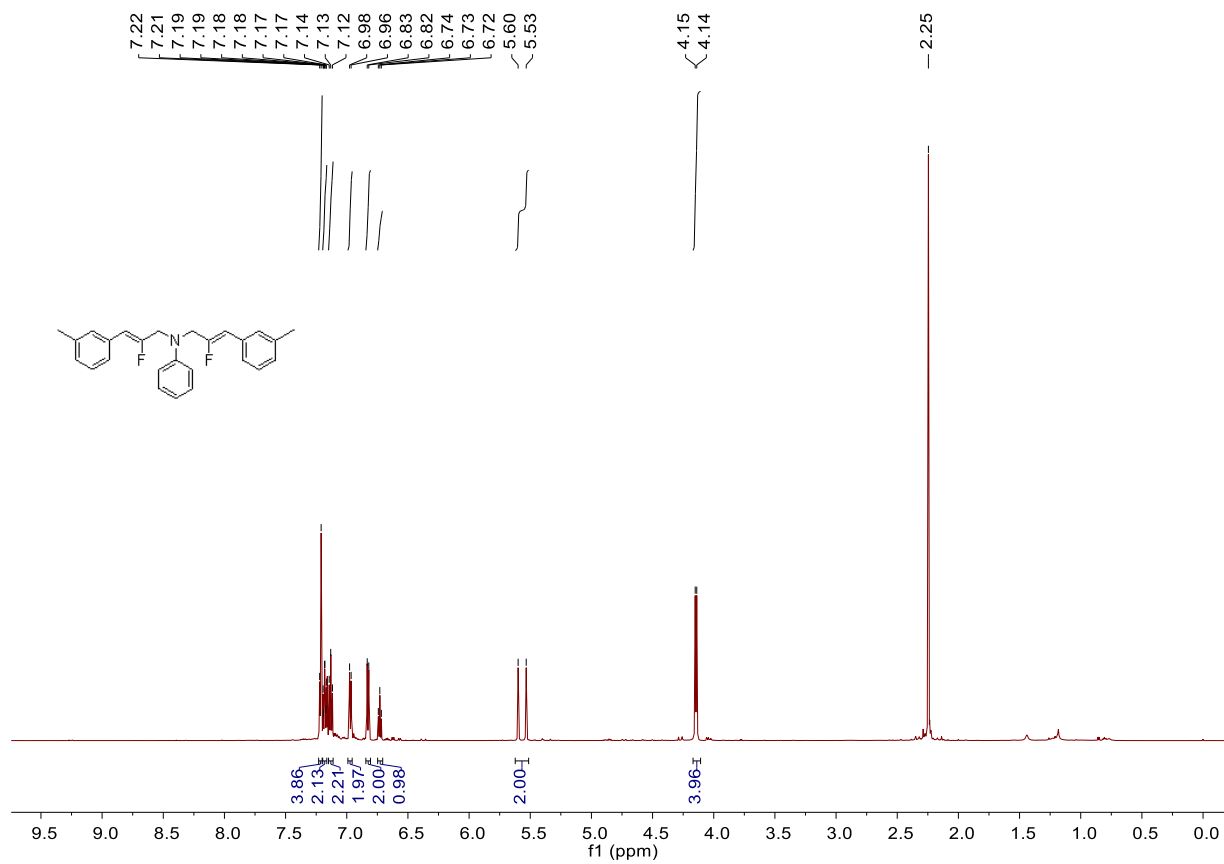

<sup>19</sup>F NMR (d6)

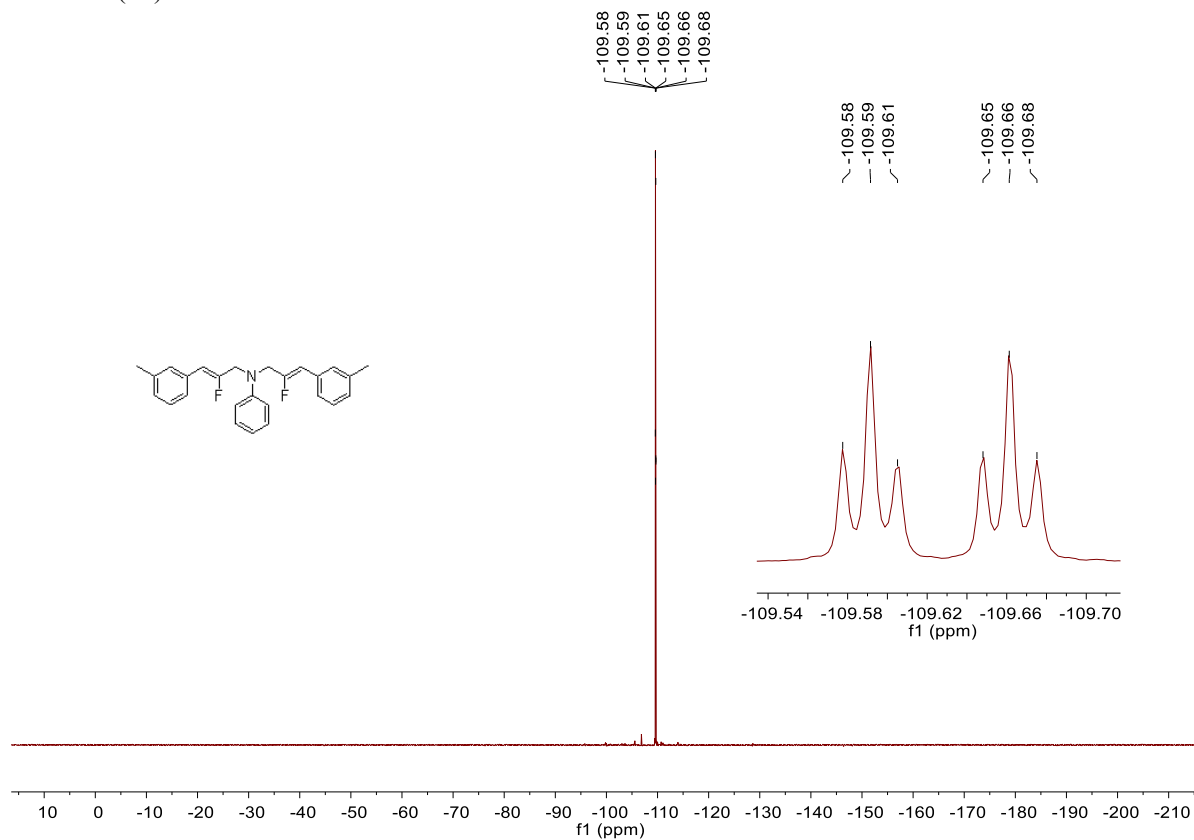

<sup>13</sup>C NMR (d6)

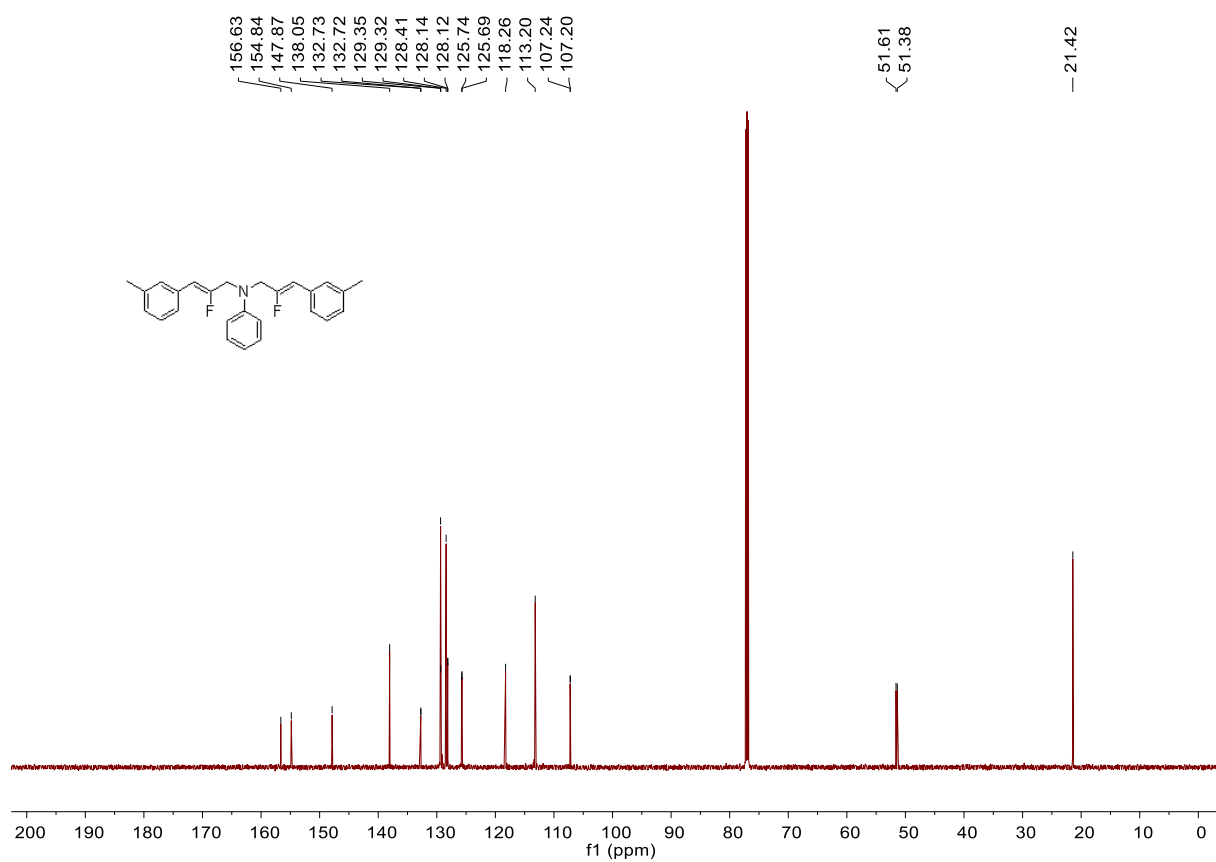

<sup>1</sup>H NMR (d7)

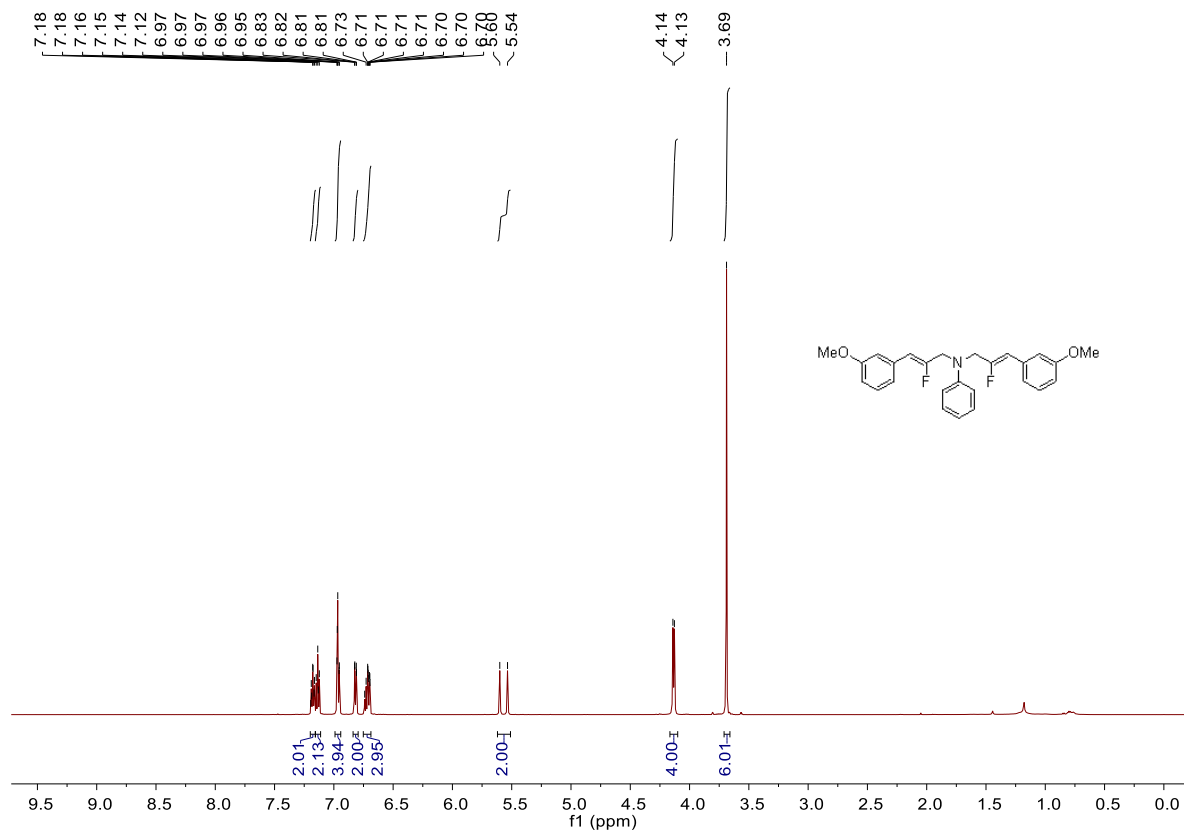

<sup>19</sup>F NMR (d7)

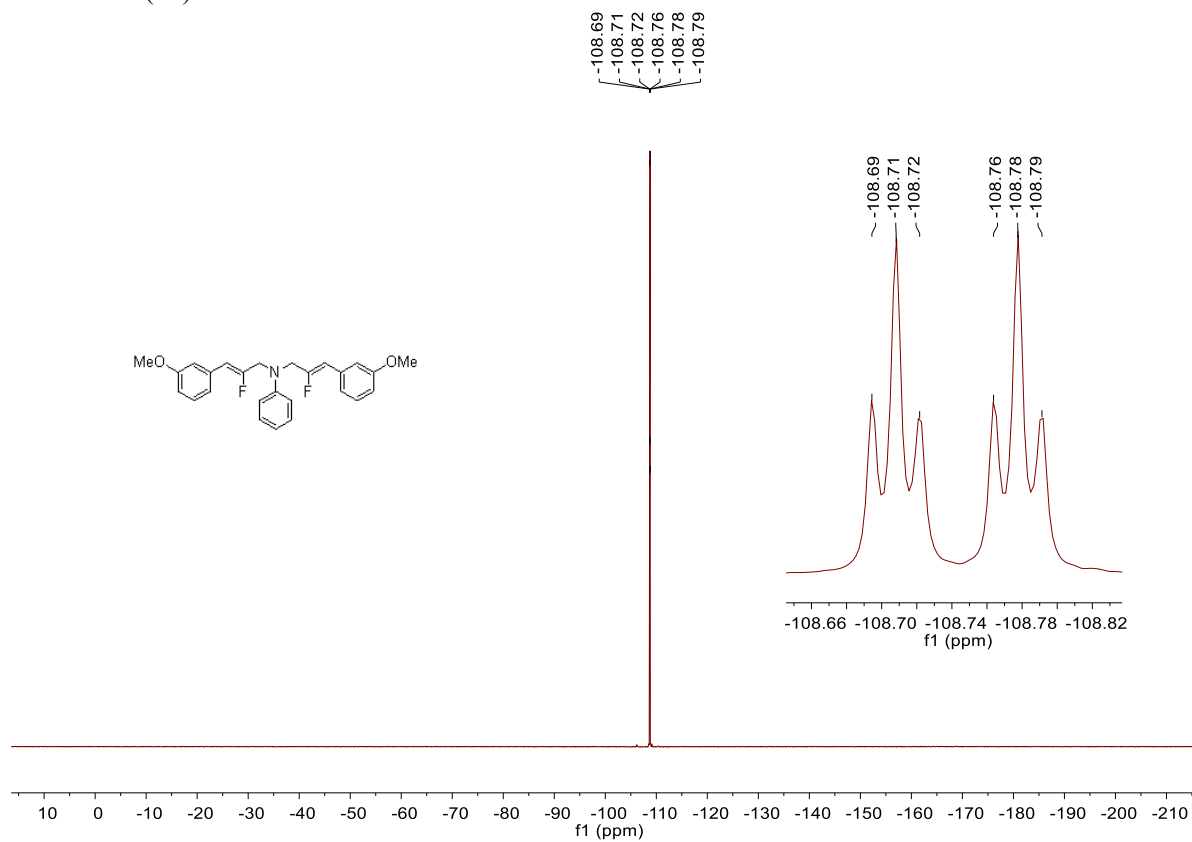

<sup>13</sup>C NMR (d7)

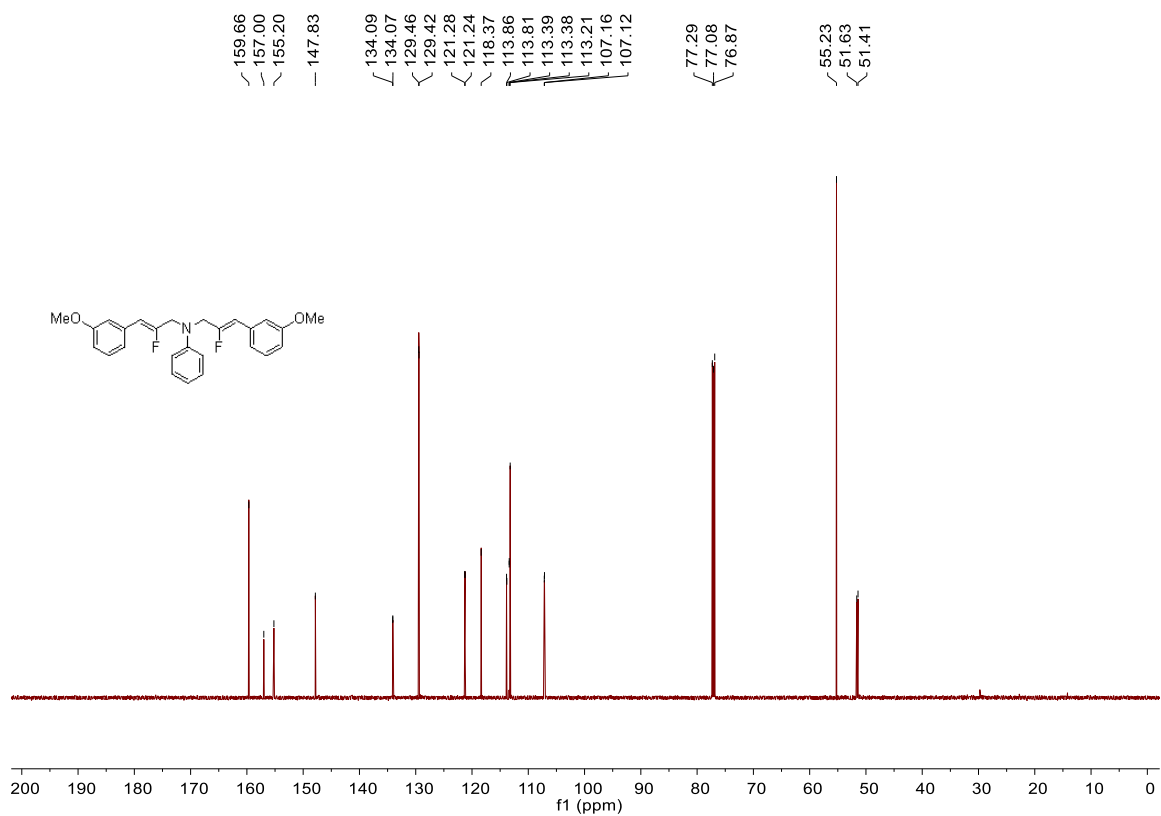

<sup>1</sup>H NMR (d8)

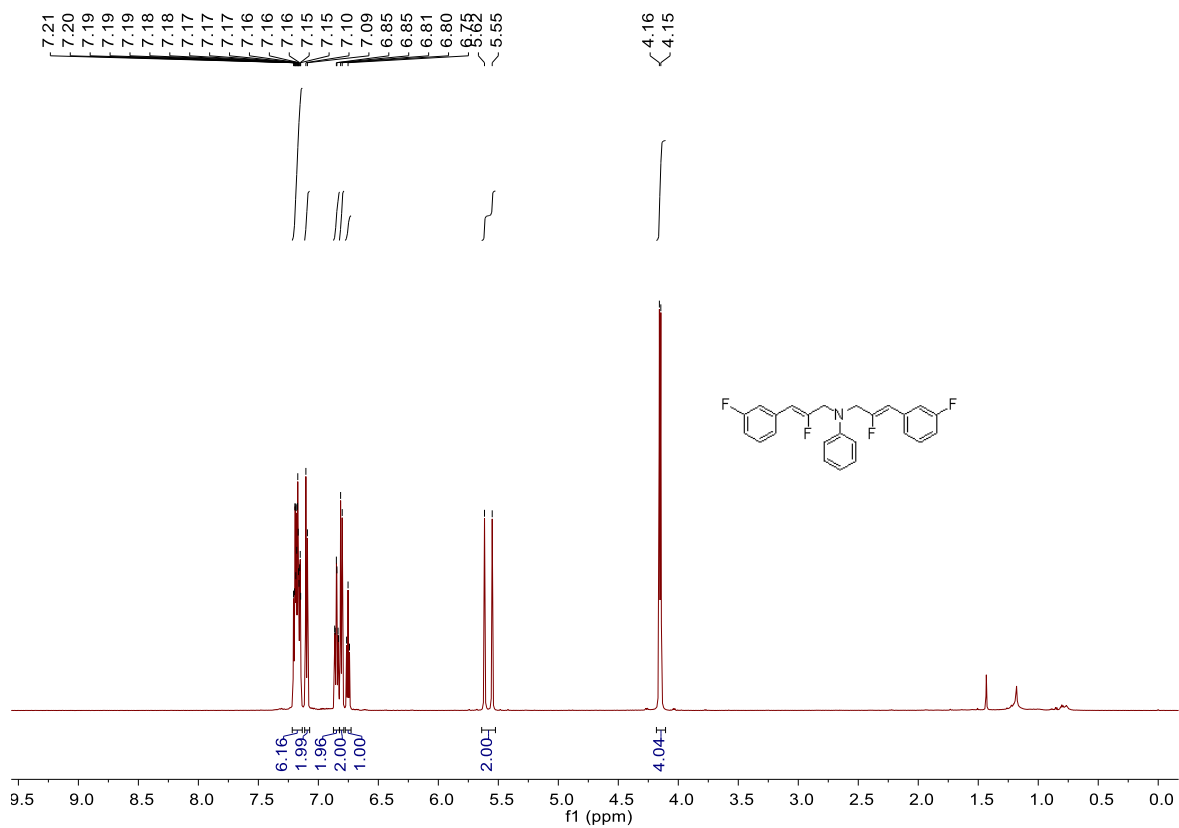

<sup>19</sup>F NMR (d8)

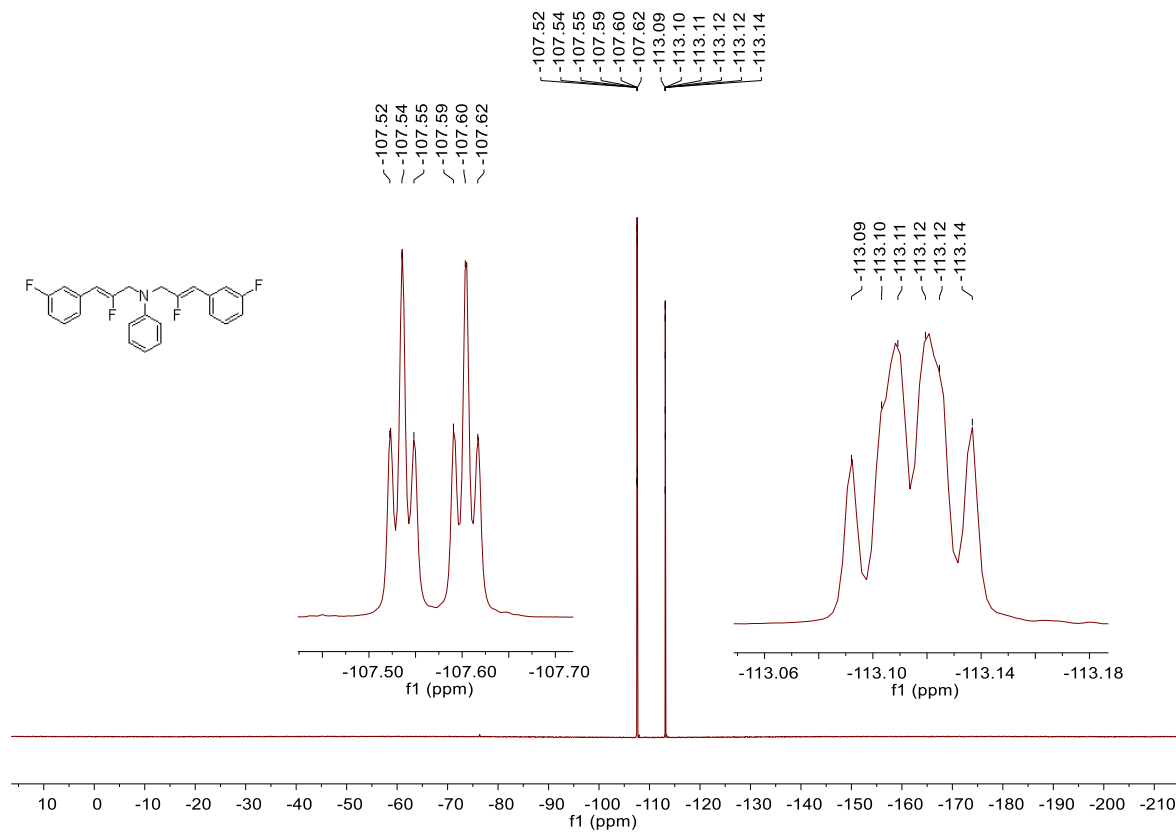

<sup>13</sup>C NMR (d8)

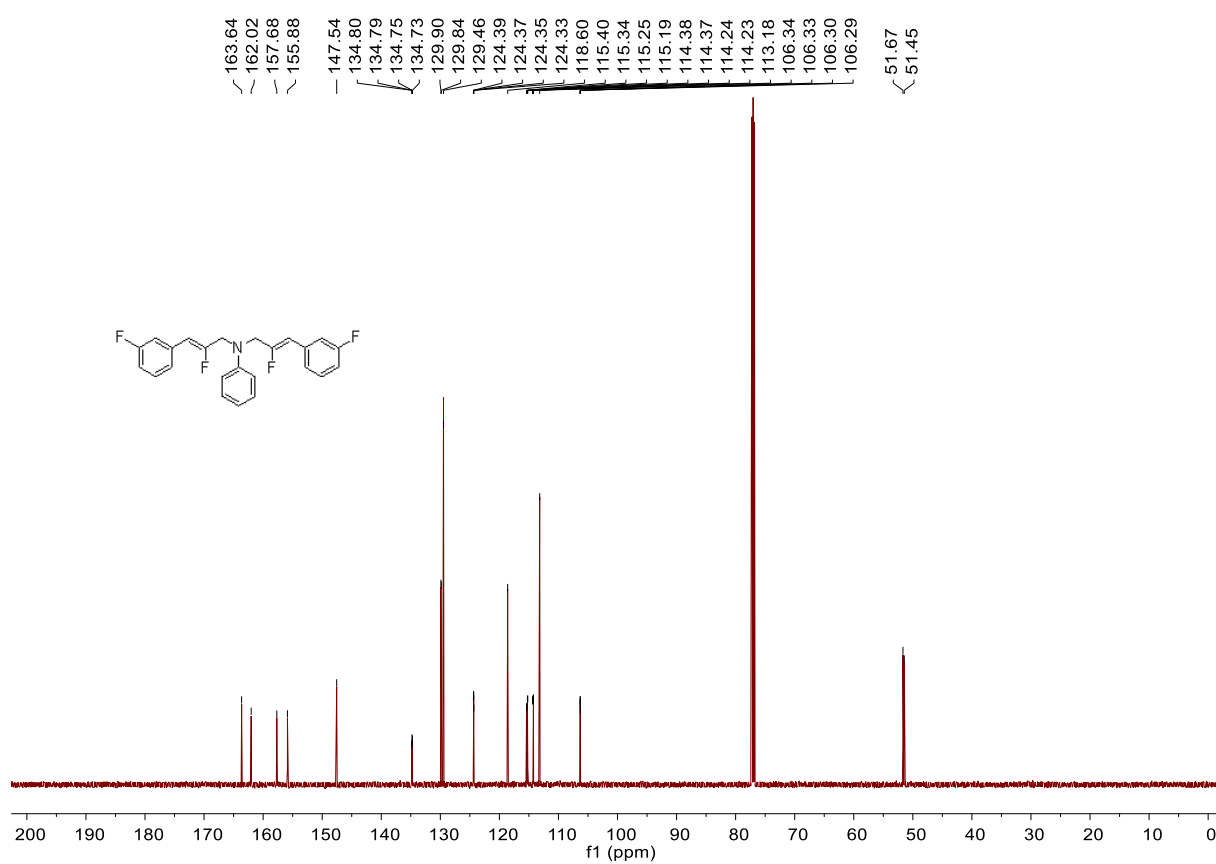



<sup>1</sup>H NMR (d9)

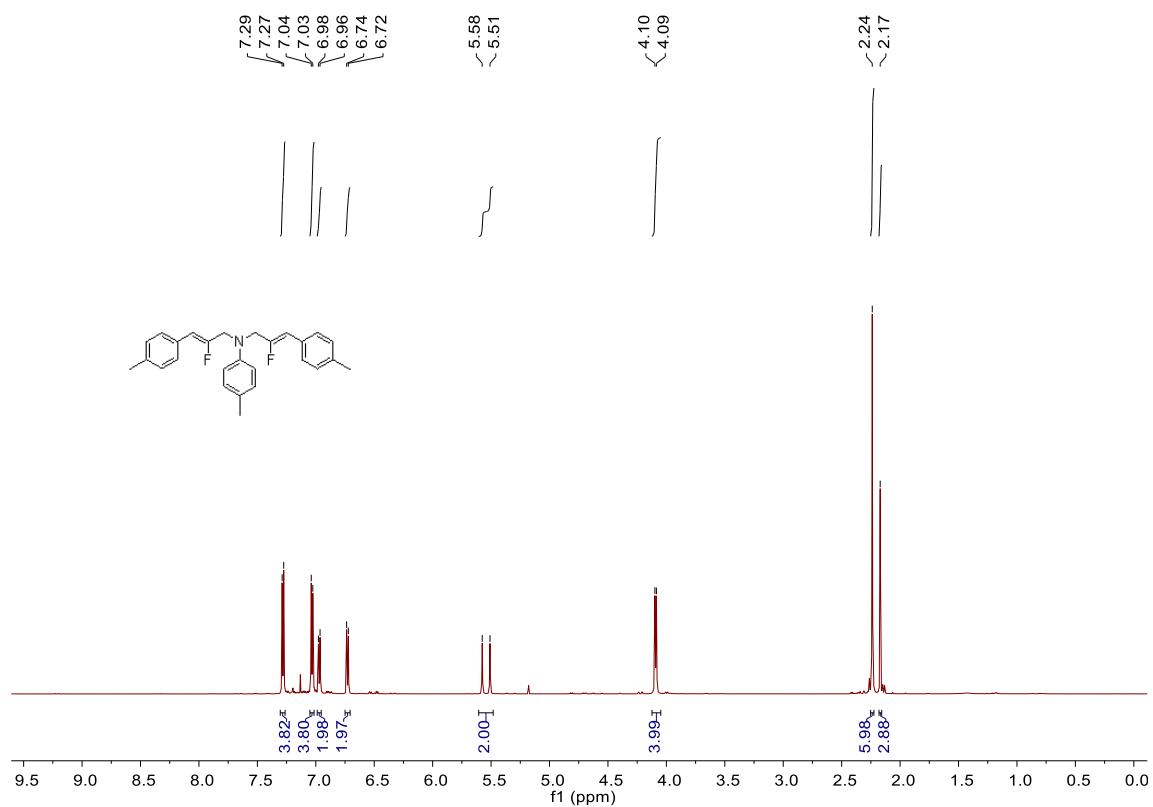

<sup>19</sup>F NMR (d9)

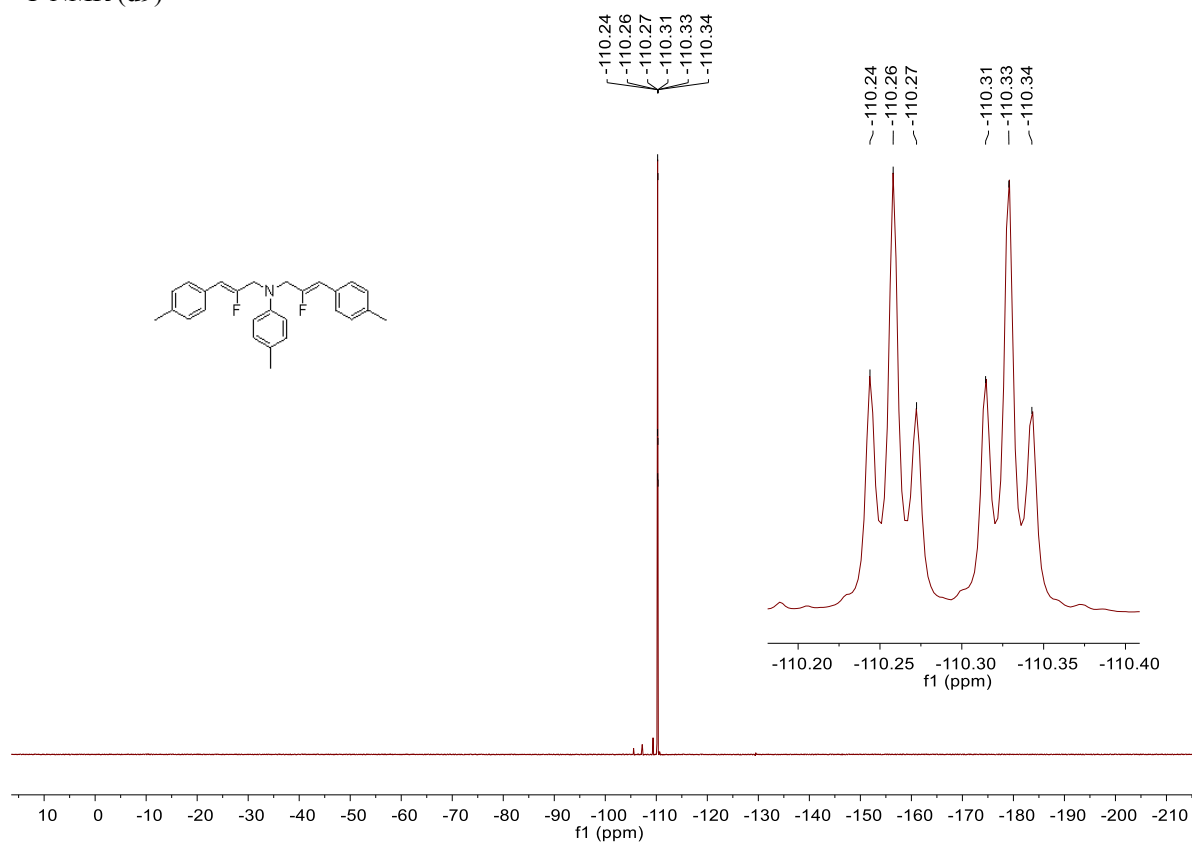

<sup>13</sup>C NMR (d9)

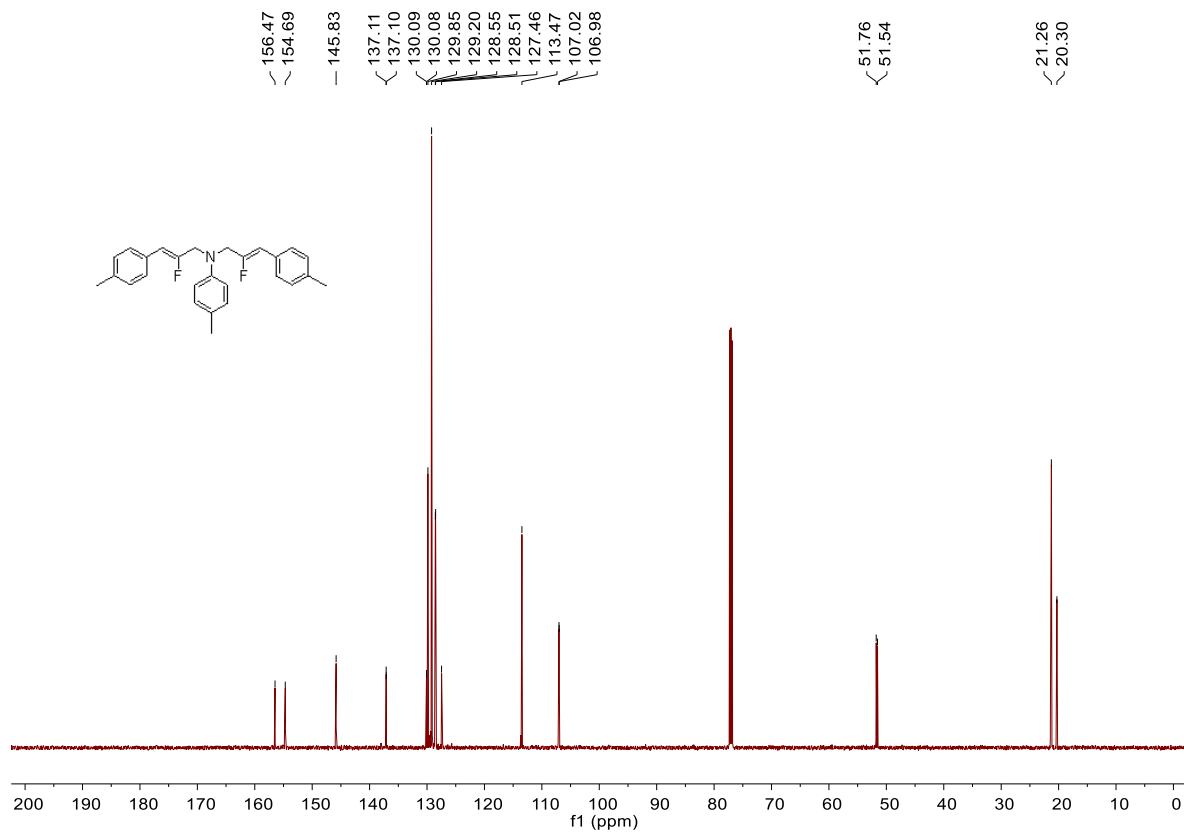

<sup>1</sup>H NMR (d10)

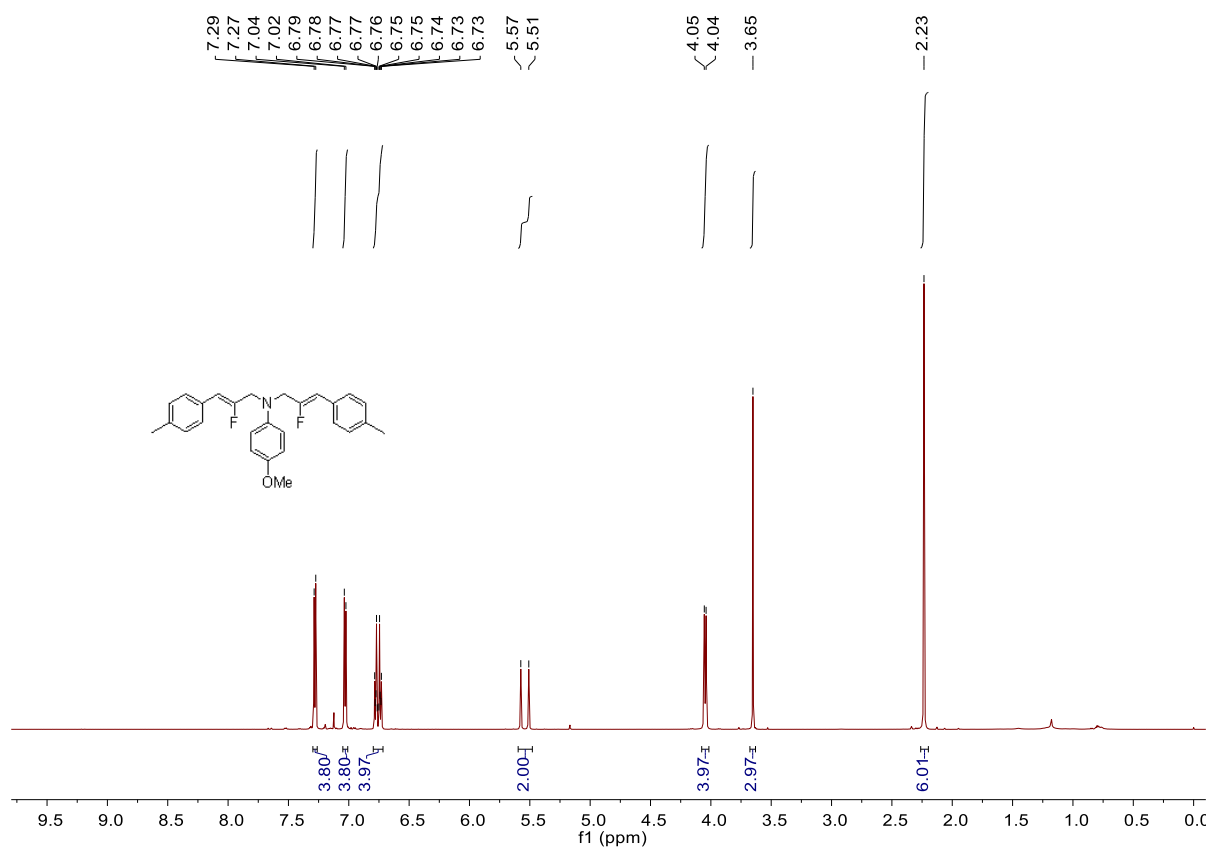

<sup>19</sup>F NMR (d10)

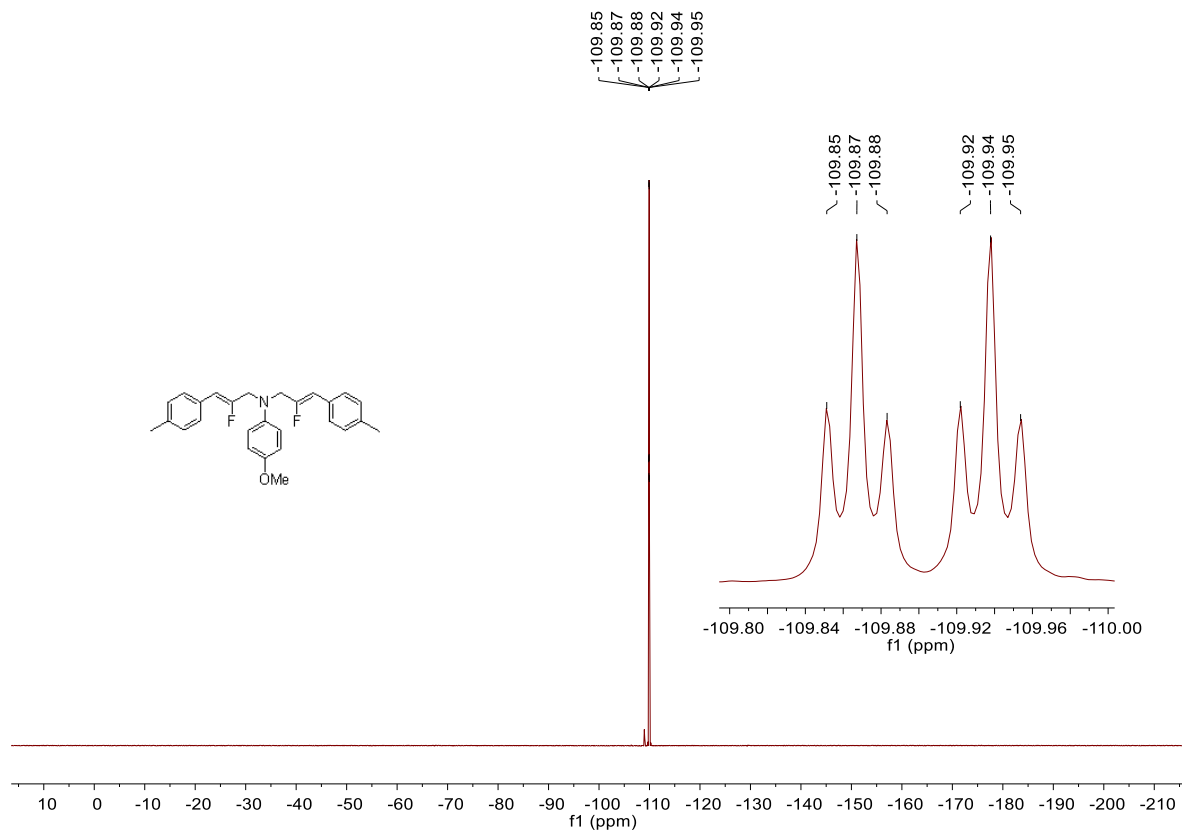

<sup>13</sup>C NMR (d10)

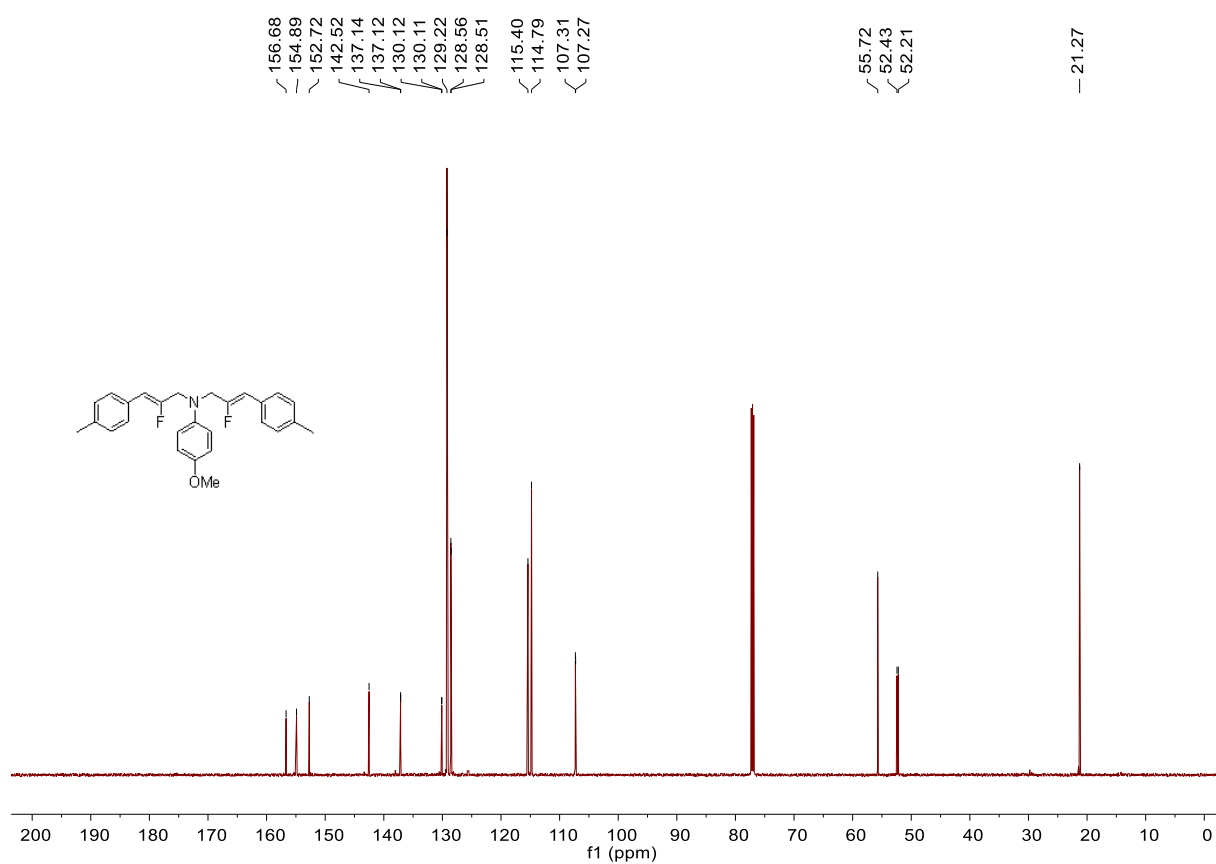

<sup>1</sup>H NMR (d11)

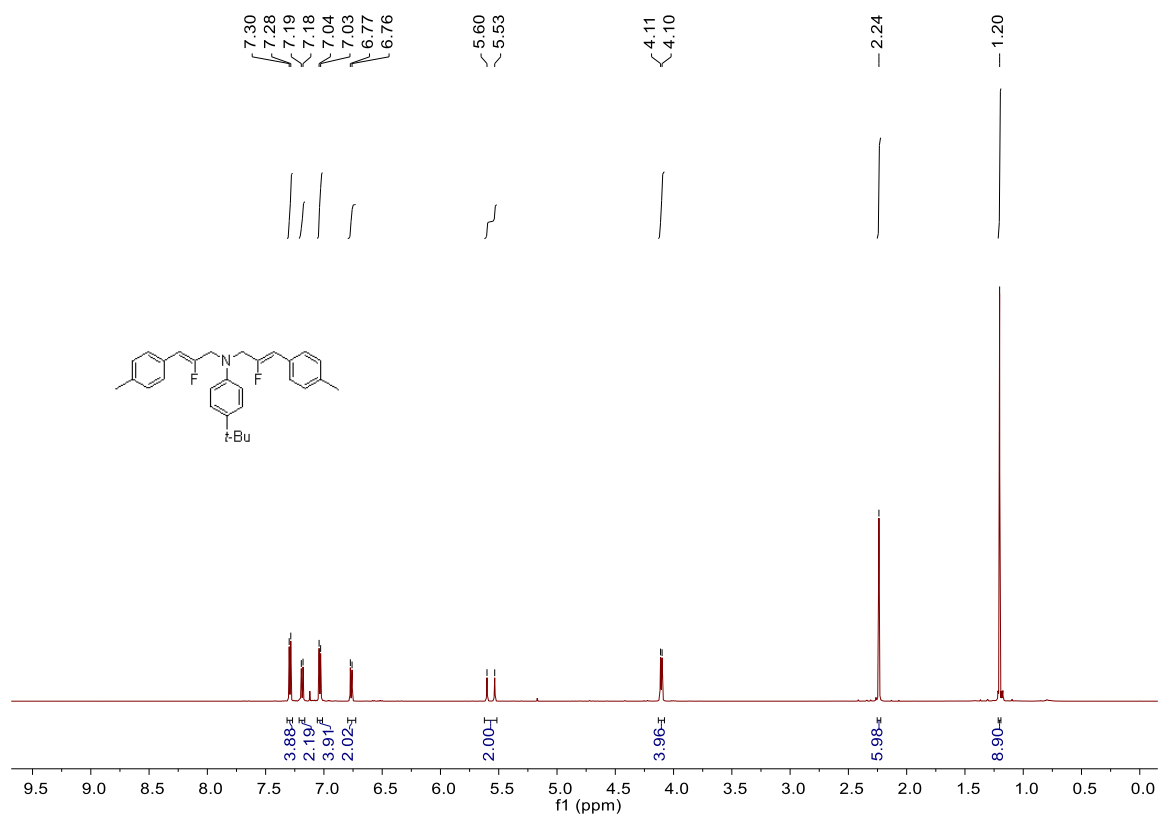

<sup>19</sup>F NMR (d11)

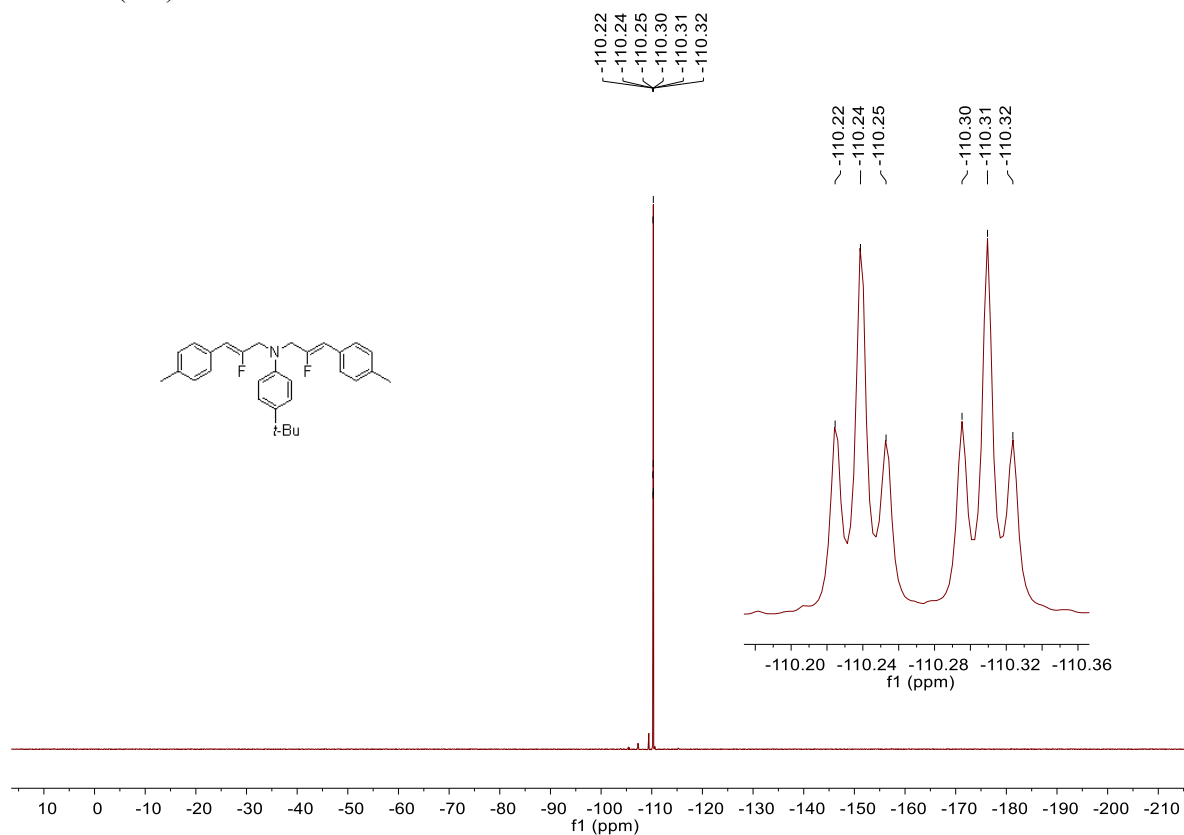

<sup>13</sup>C NMR (d11)

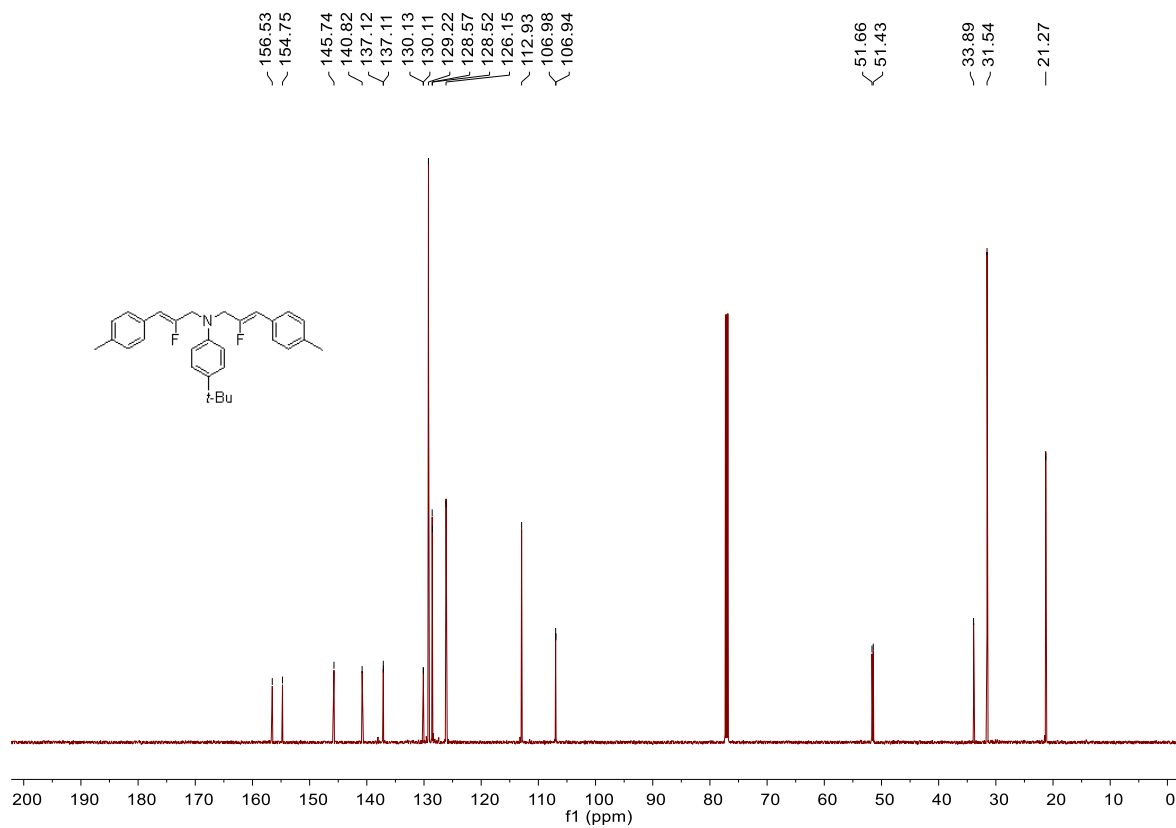

<sup>1</sup>H NMR (d12)

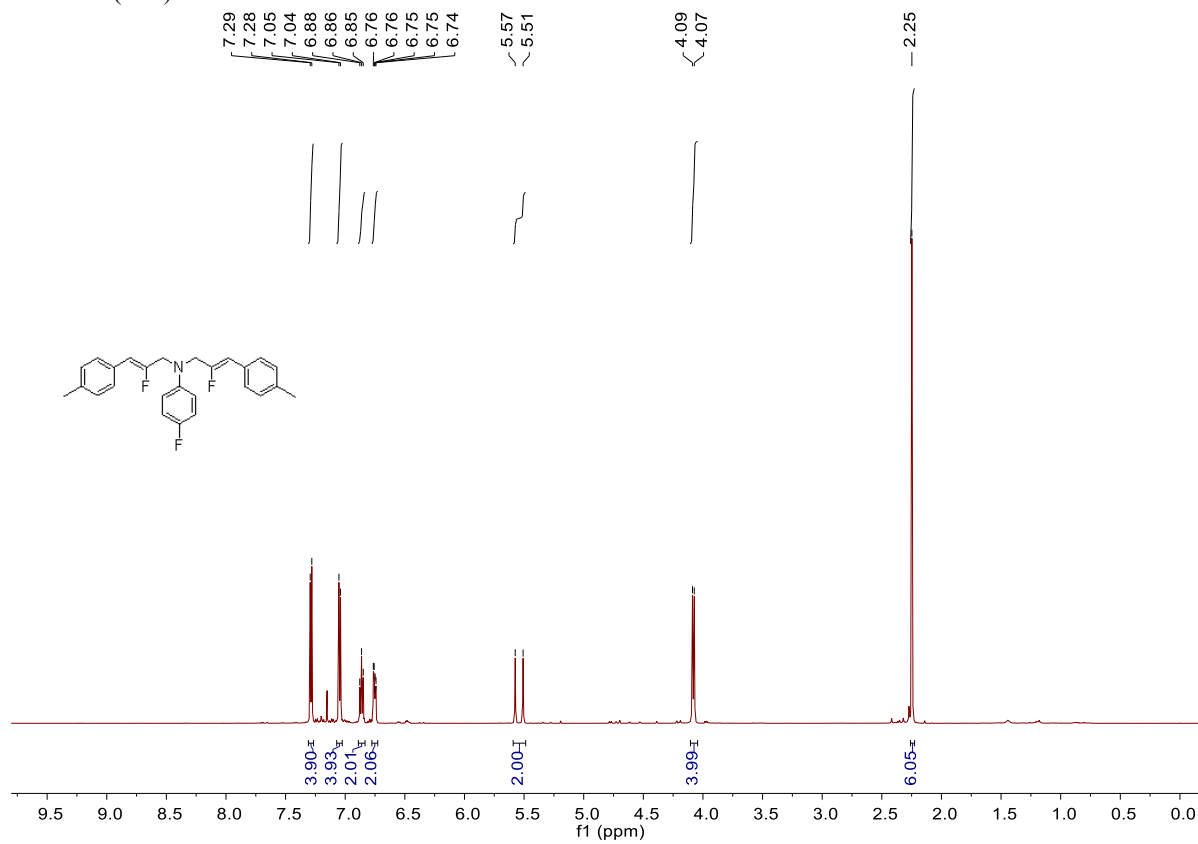

<sup>19</sup>F NMR (d12)

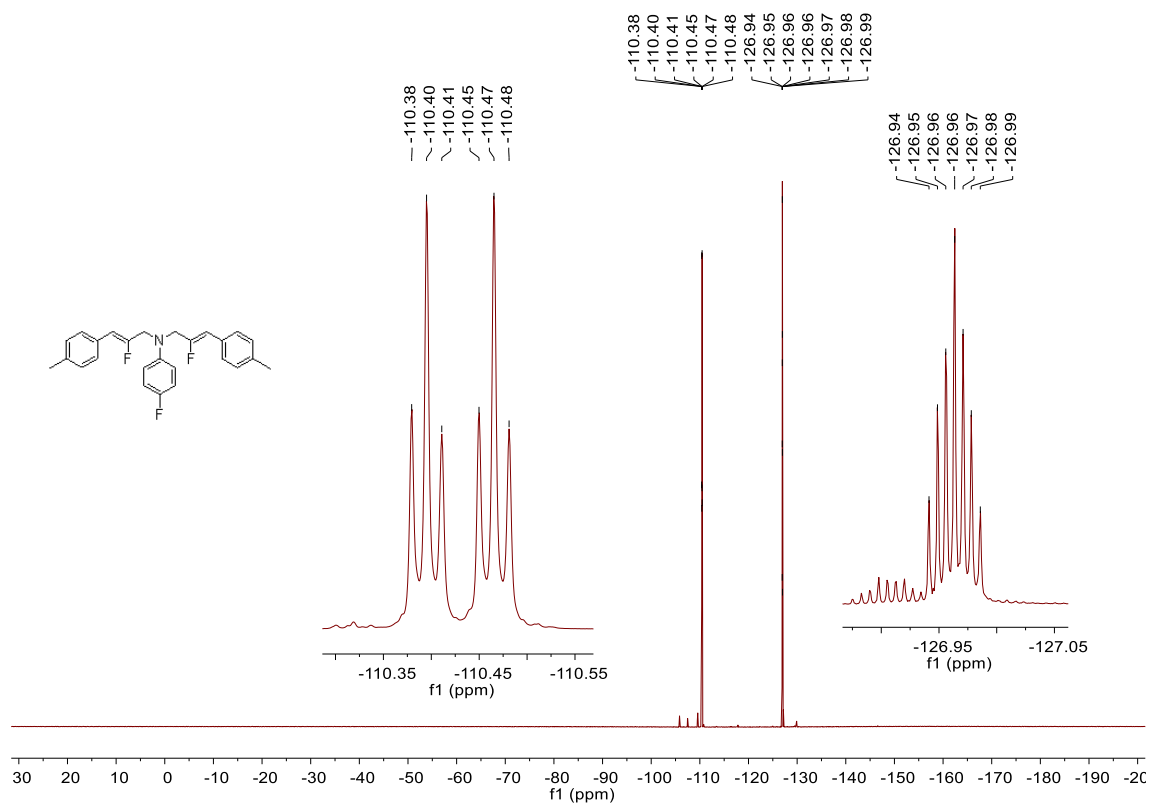

<sup>13</sup>C NMR (d12)

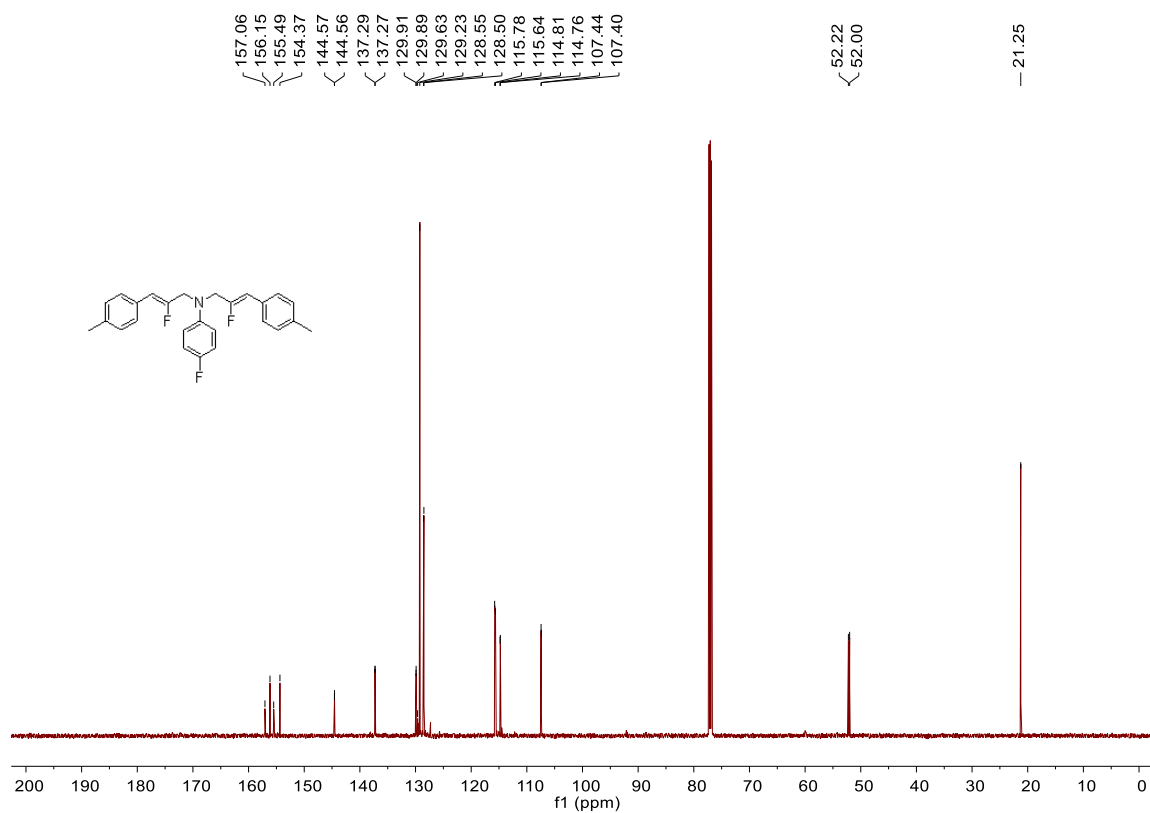

### <sup>1</sup>H NMR (d13)

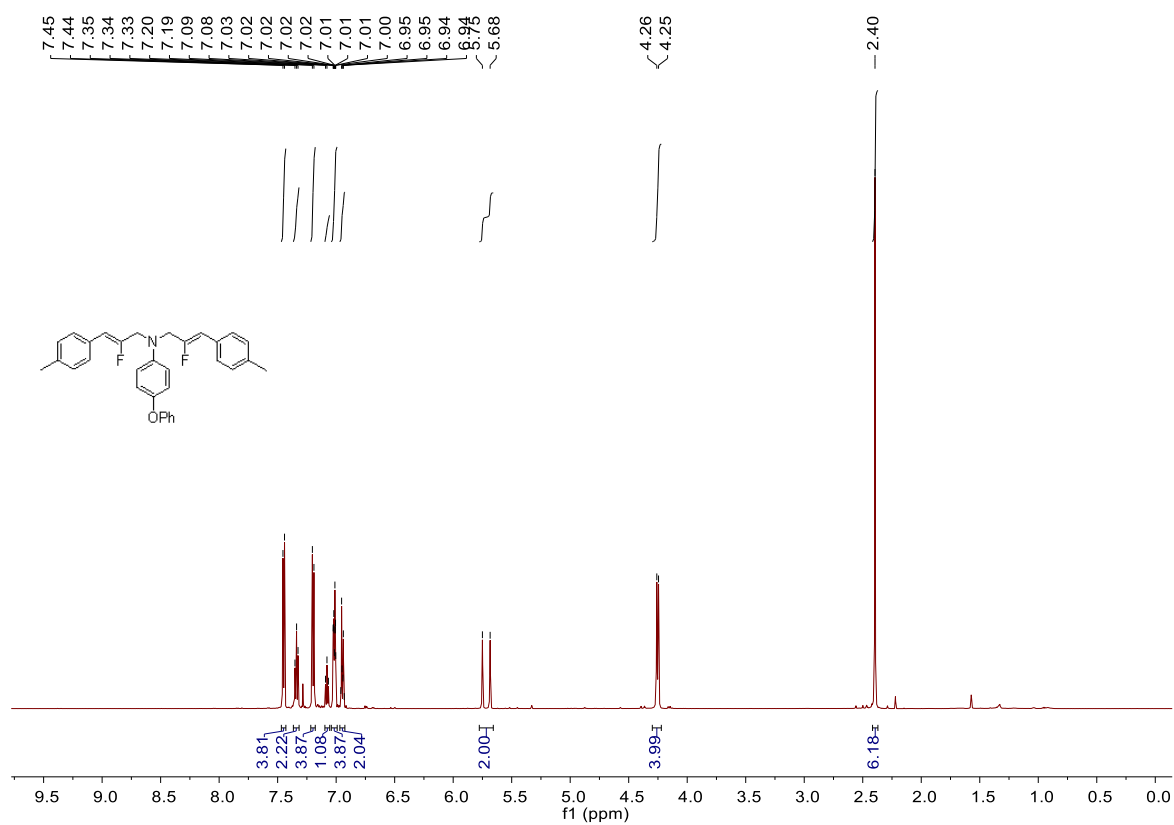

### <sup>19</sup>F NMR (d13)

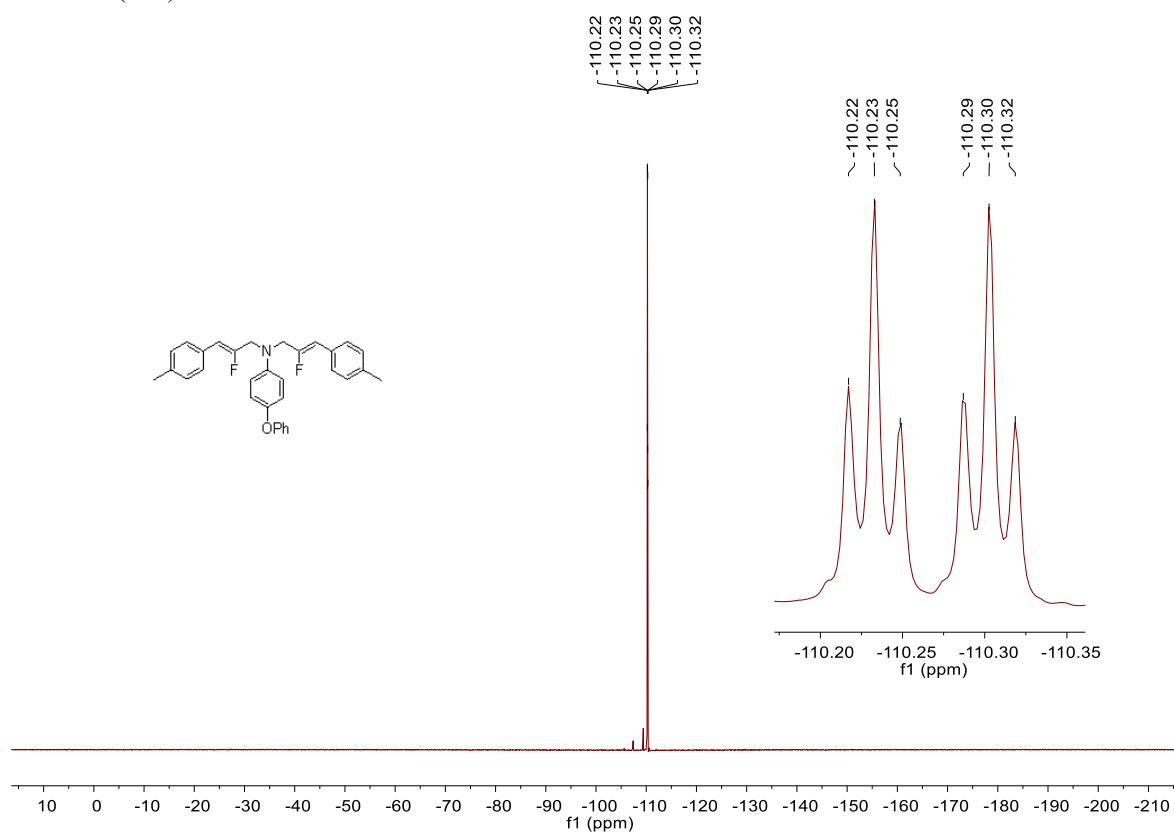

<sup>13</sup>C NMR (d13)

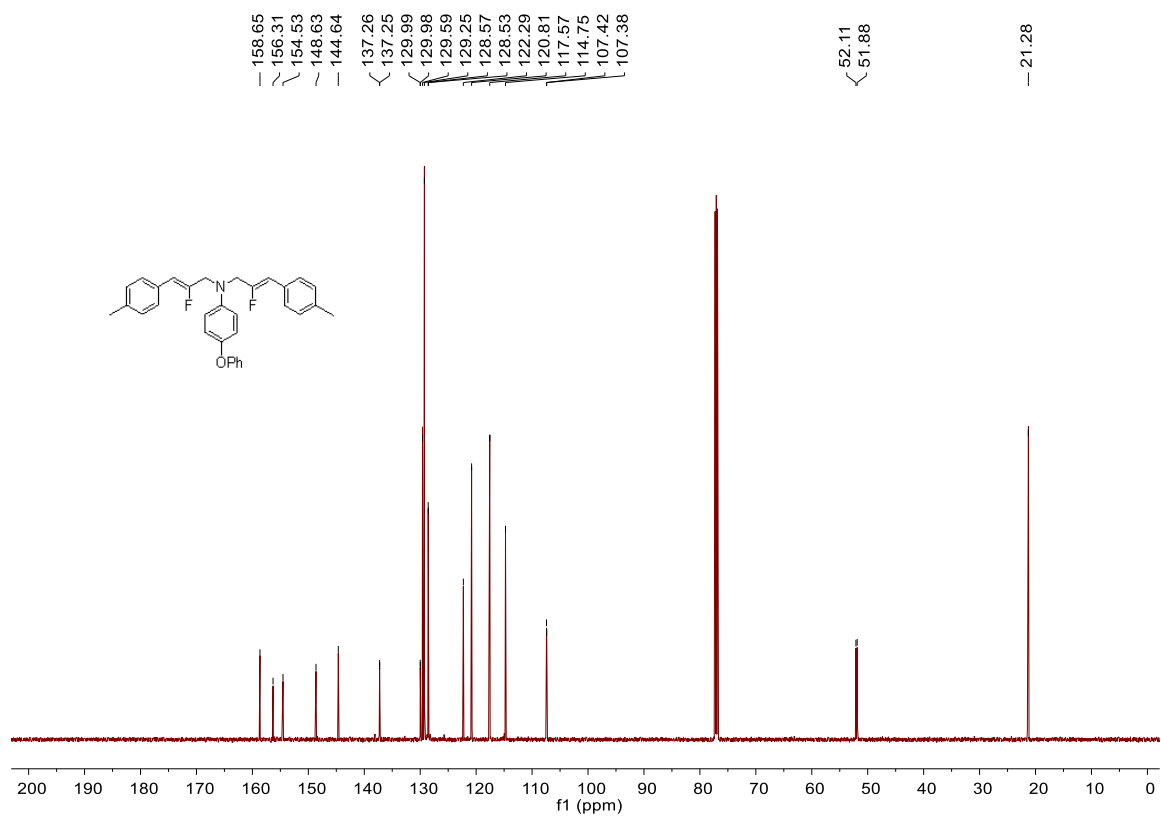

<sup>1</sup>H NMR (d14)

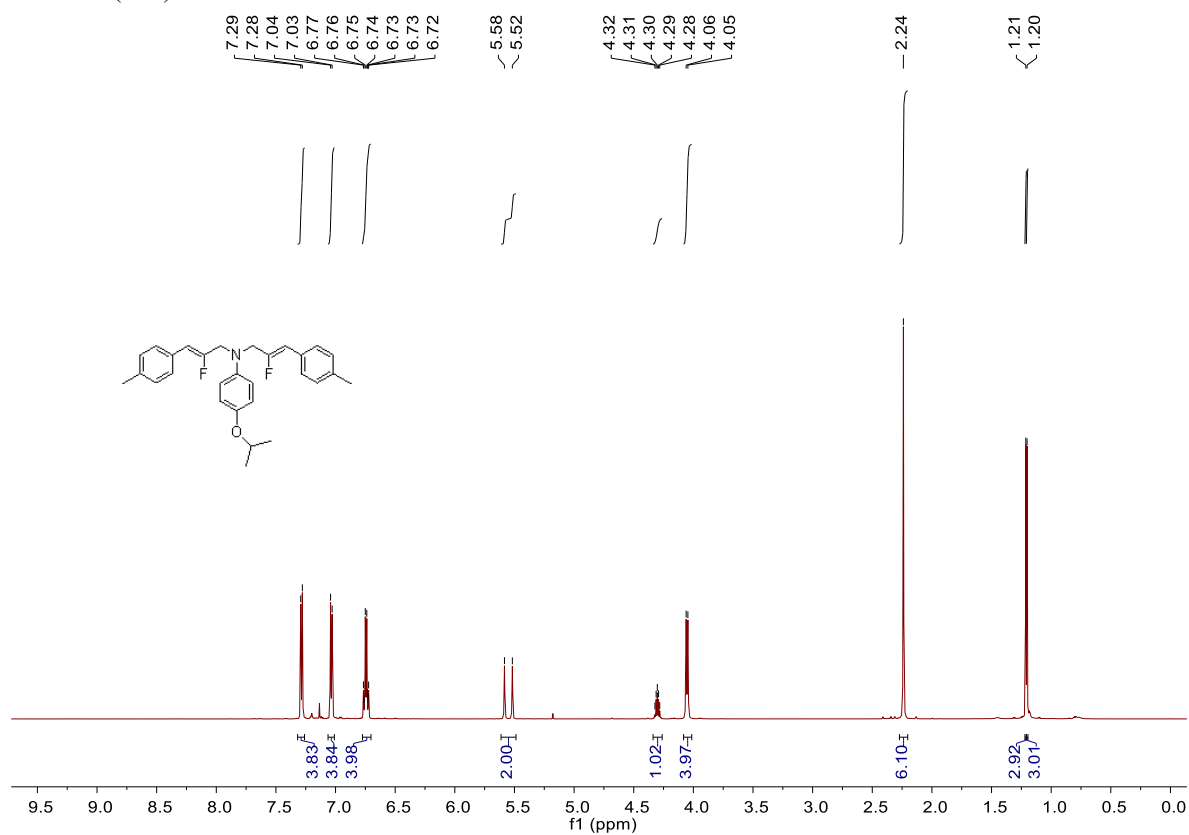



<sup>19</sup>F NMR (d14)

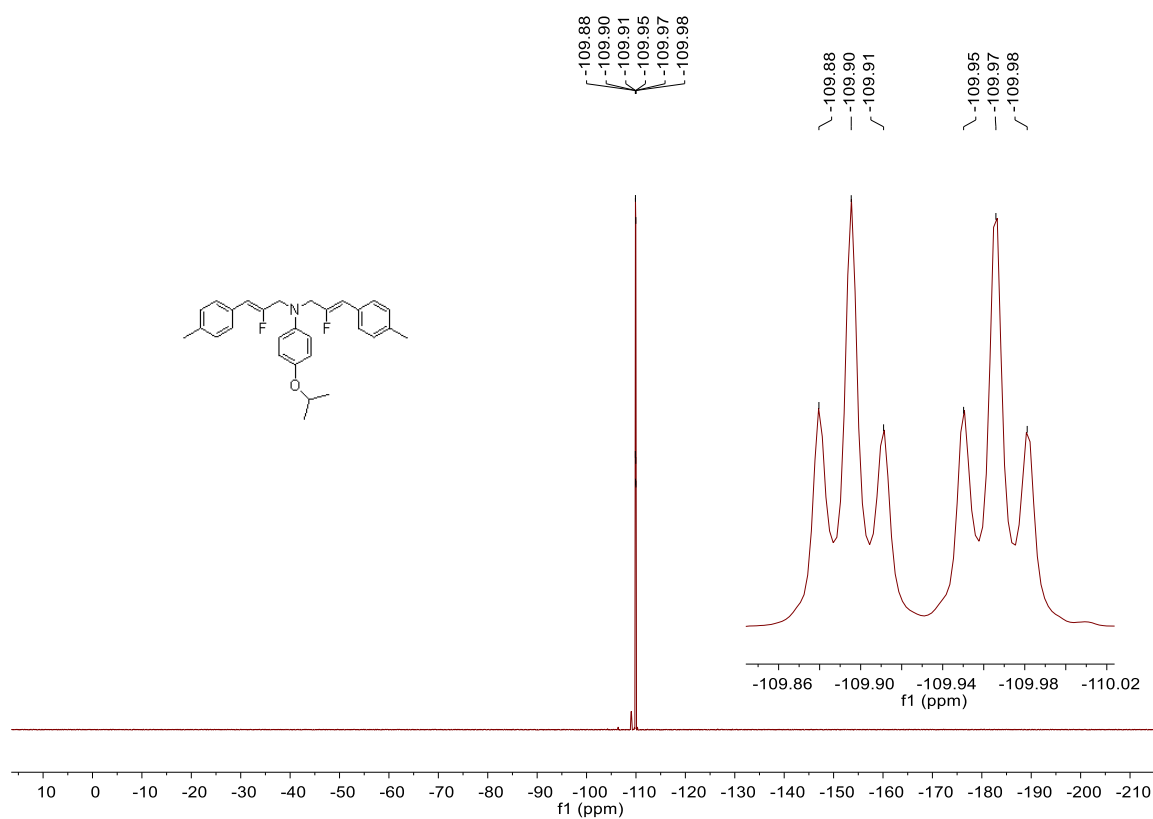

<sup>13</sup>C NMR (d14)

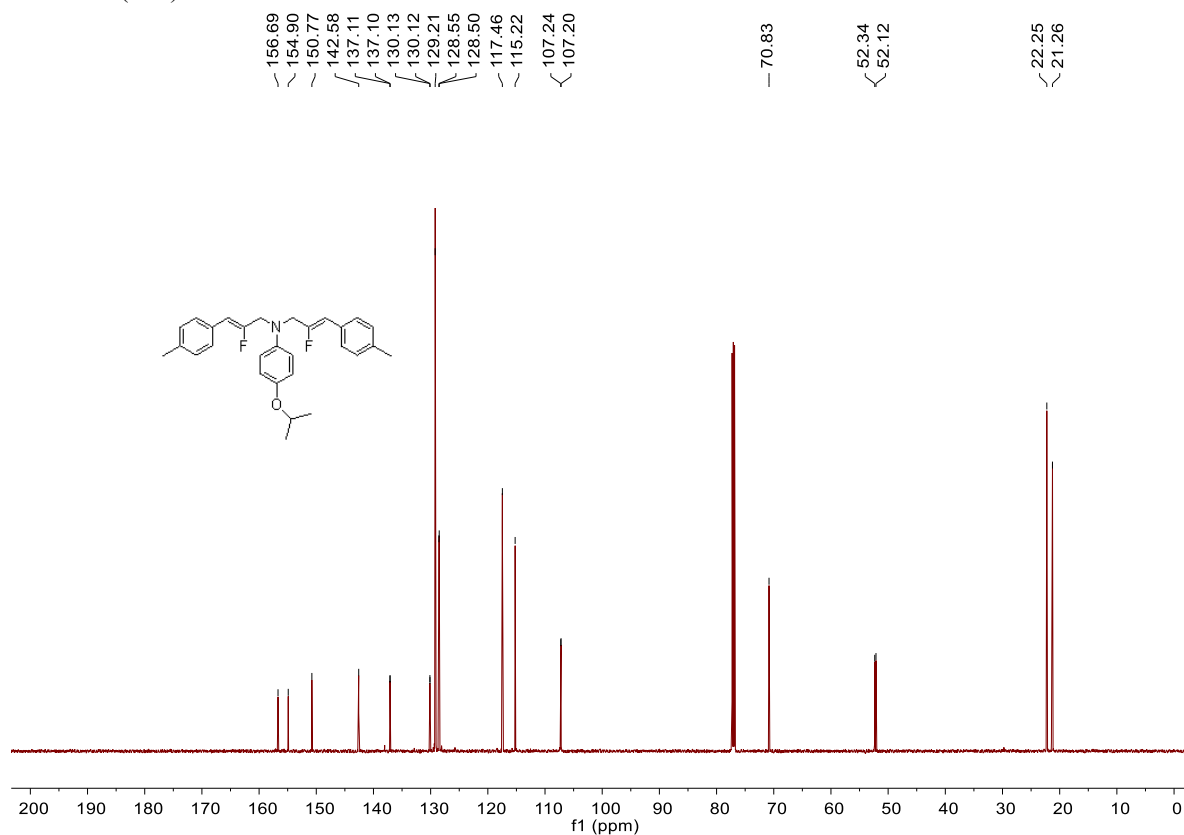

<sup>1</sup>H NMR (d15)

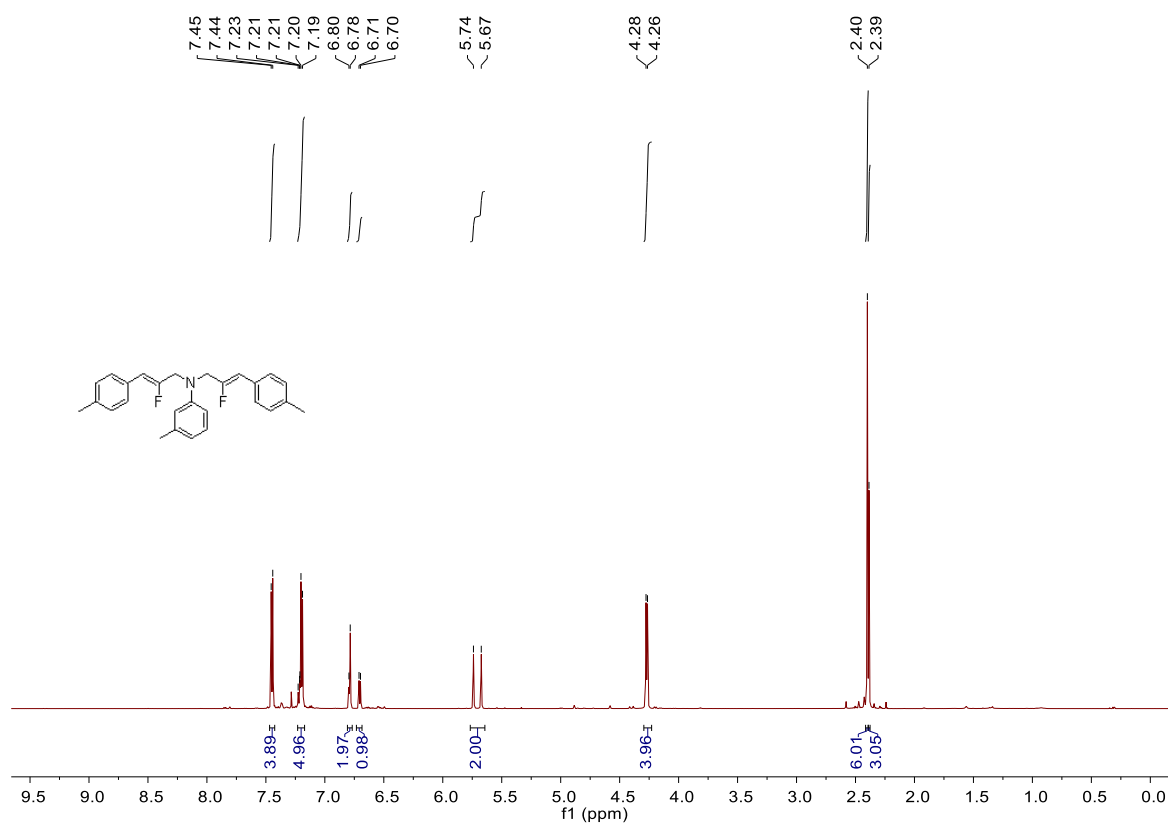

<sup>19</sup>F NMR (d15)

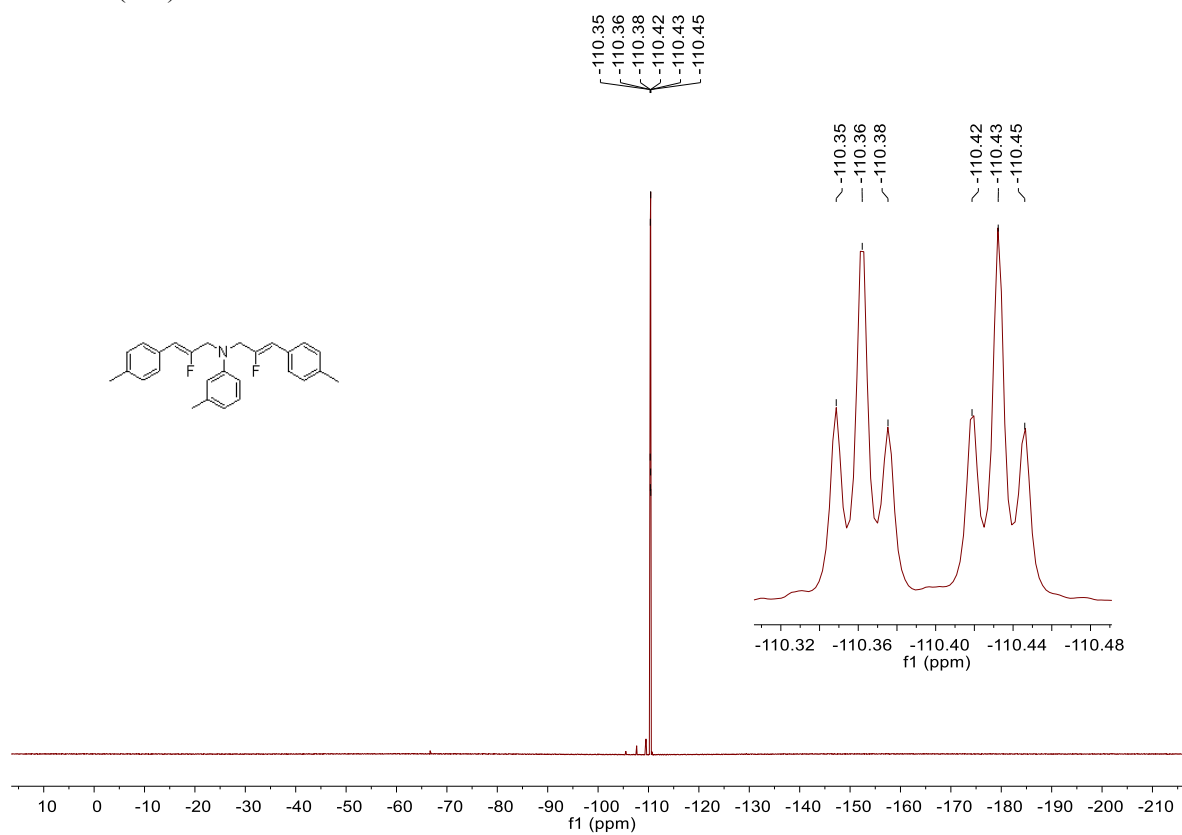

<sup>13</sup>C NMR (d15)

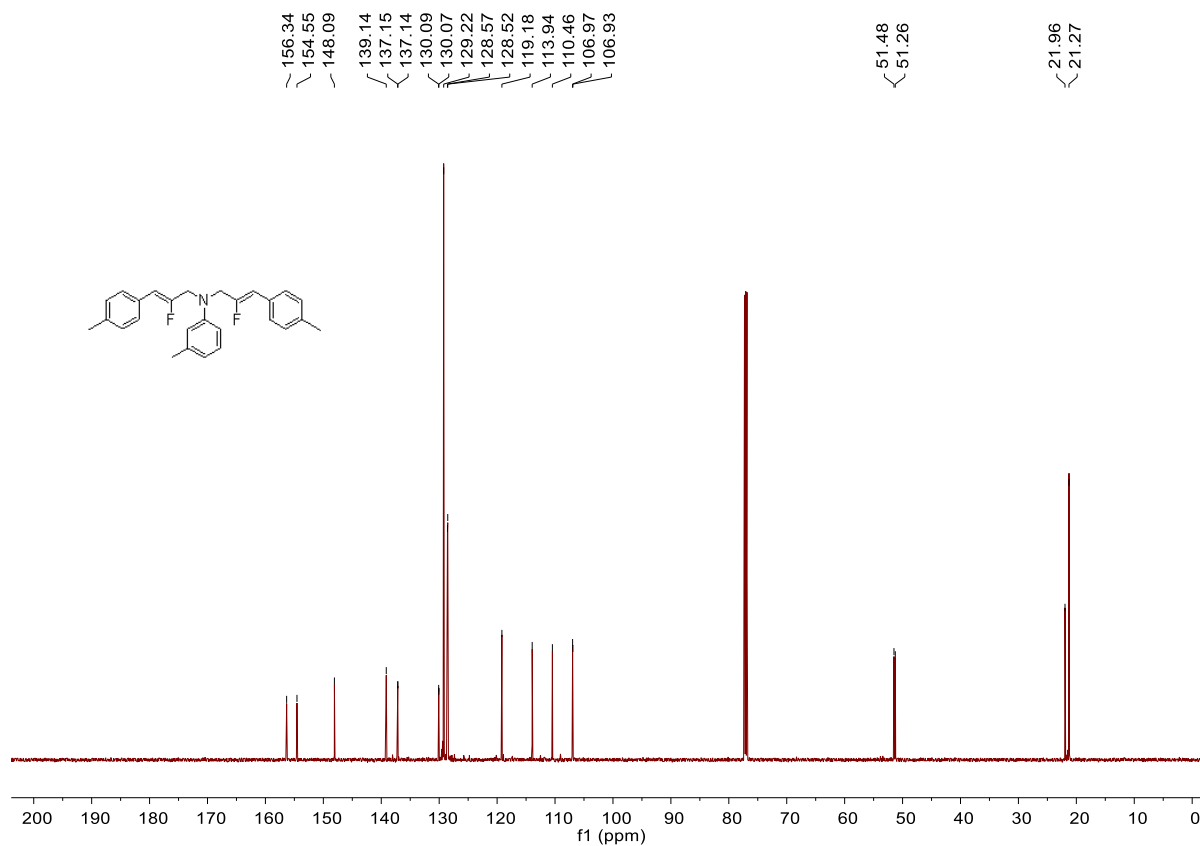

<sup>1</sup>H NMR (d16)

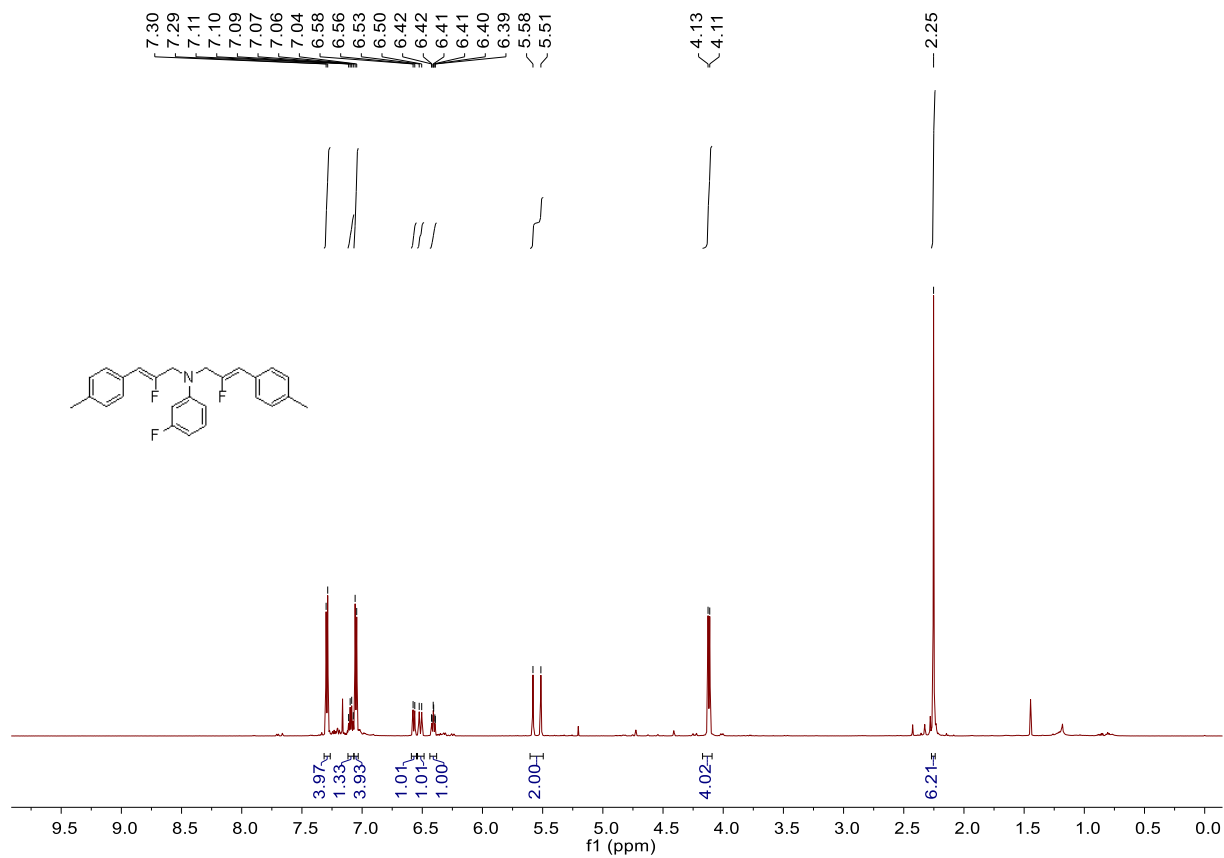

<sup>19</sup>F NMR (d16)

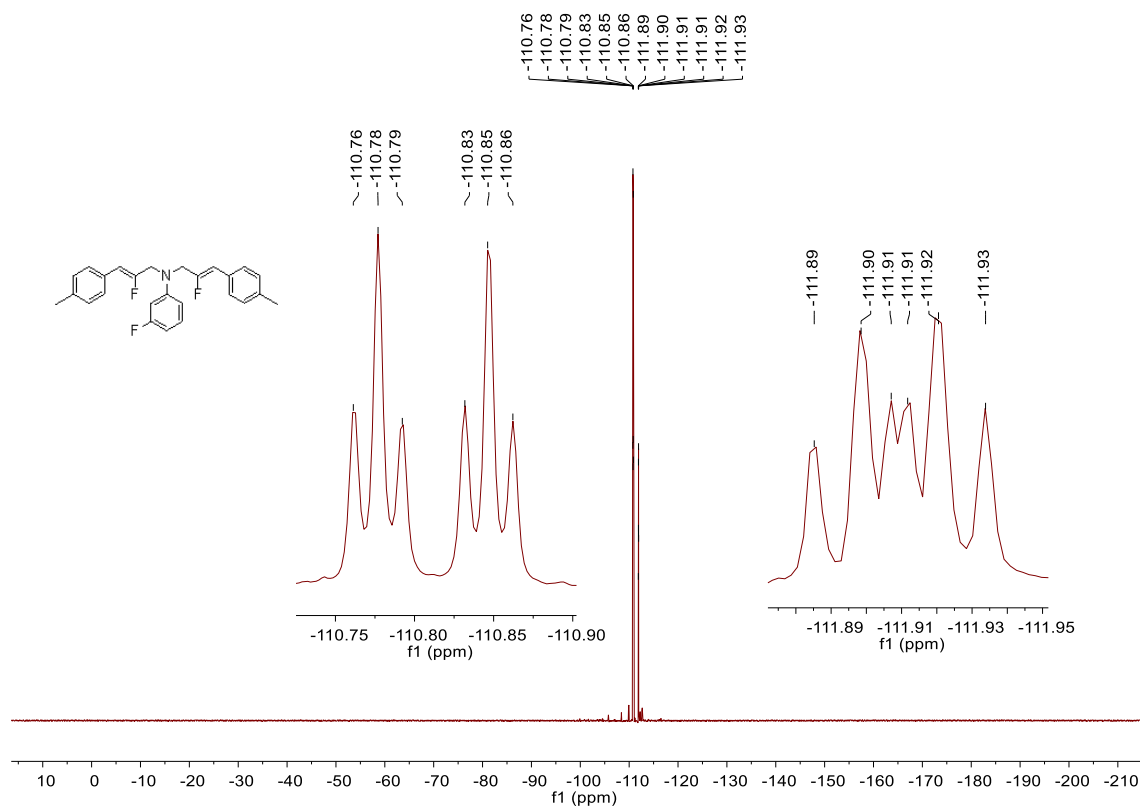

<sup>13</sup>C NMR (d16)

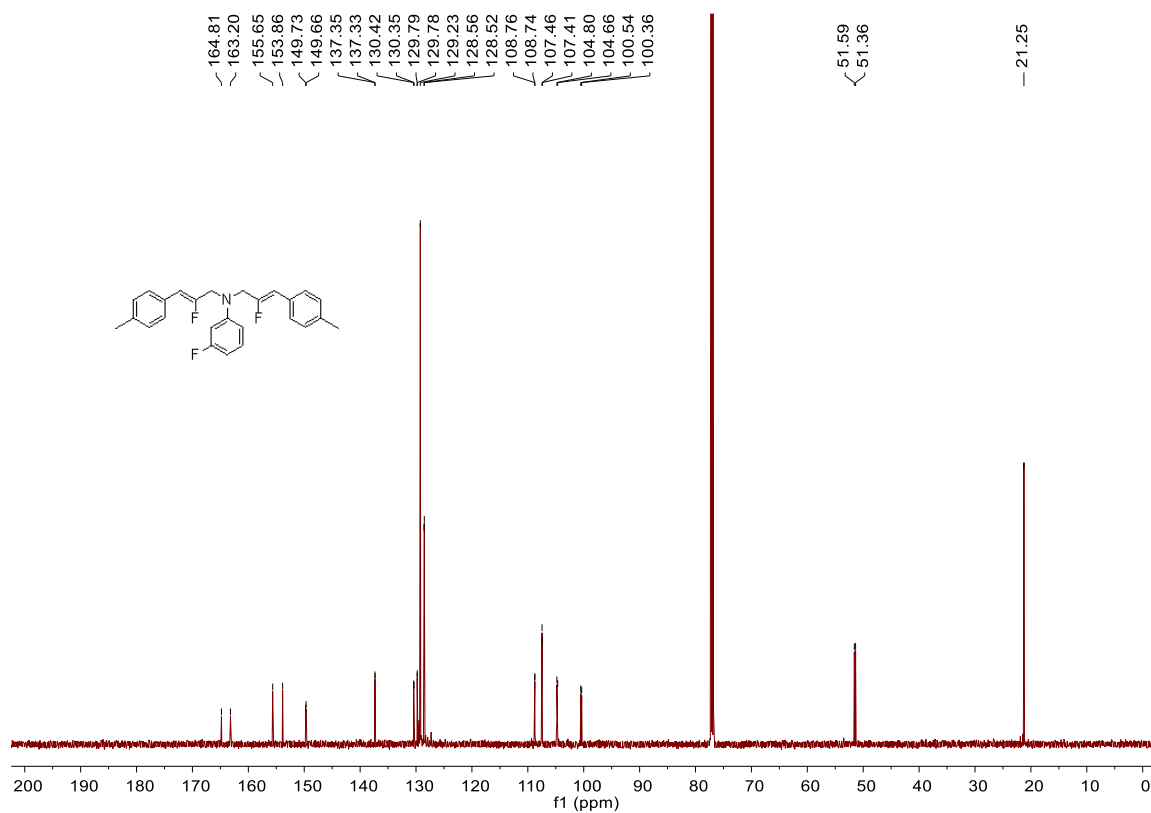

<sup>1</sup>H NMR (d17)

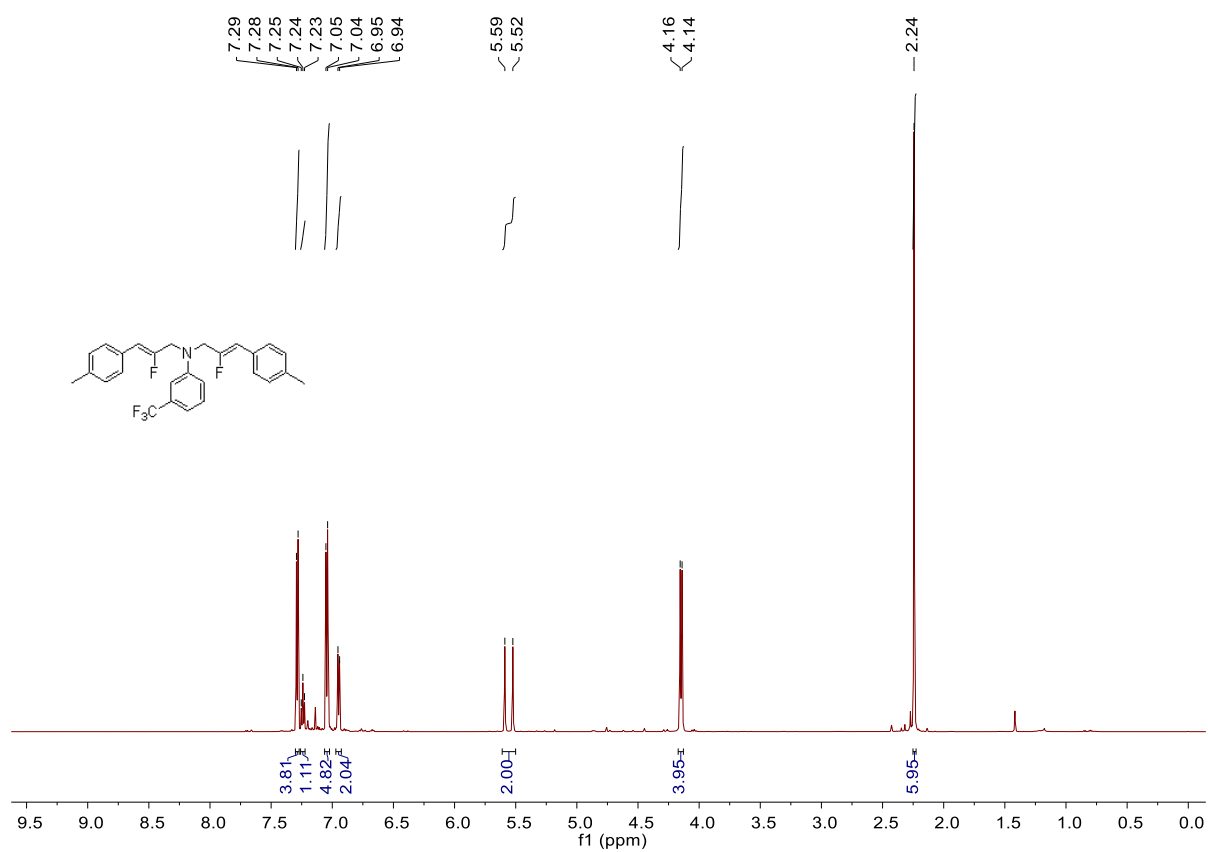

<sup>19</sup>F NMR (d17)

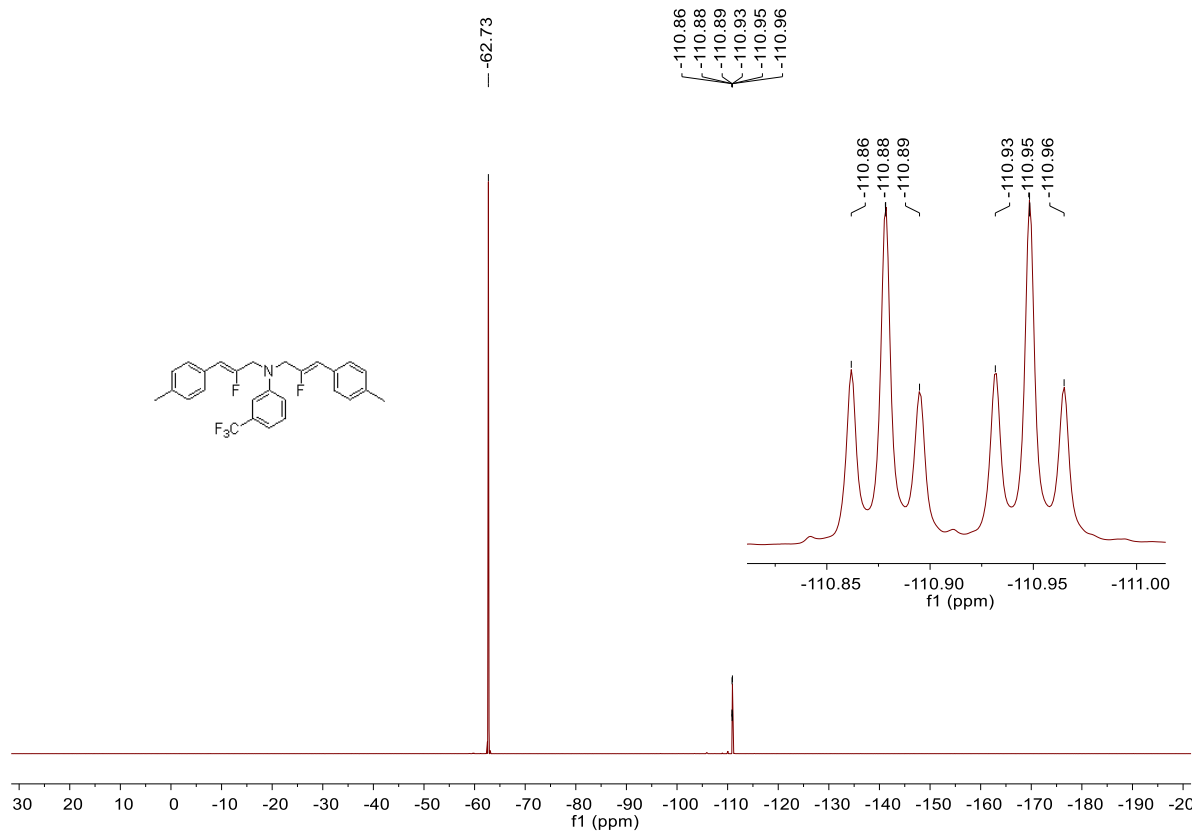

<sup>13</sup>C NMR (d17)

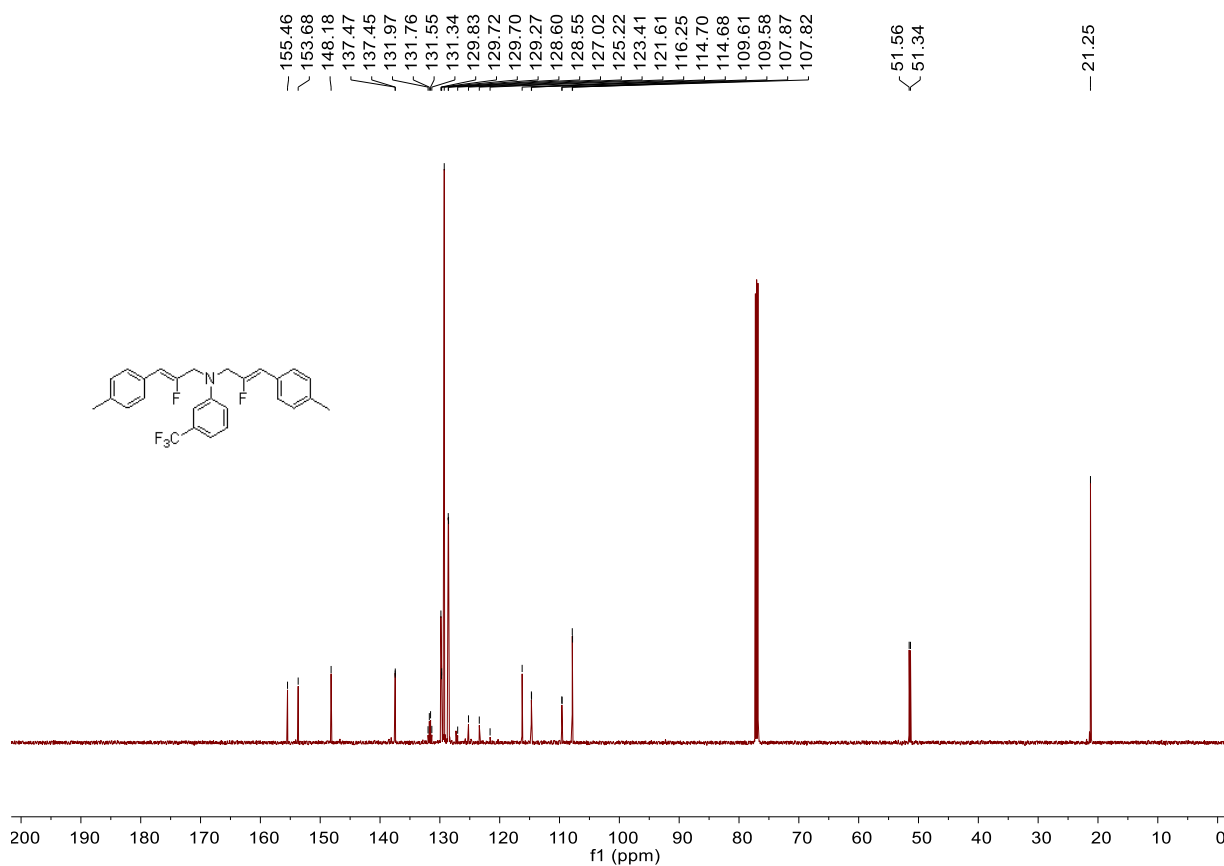

<sup>1</sup>H NMR (d18)

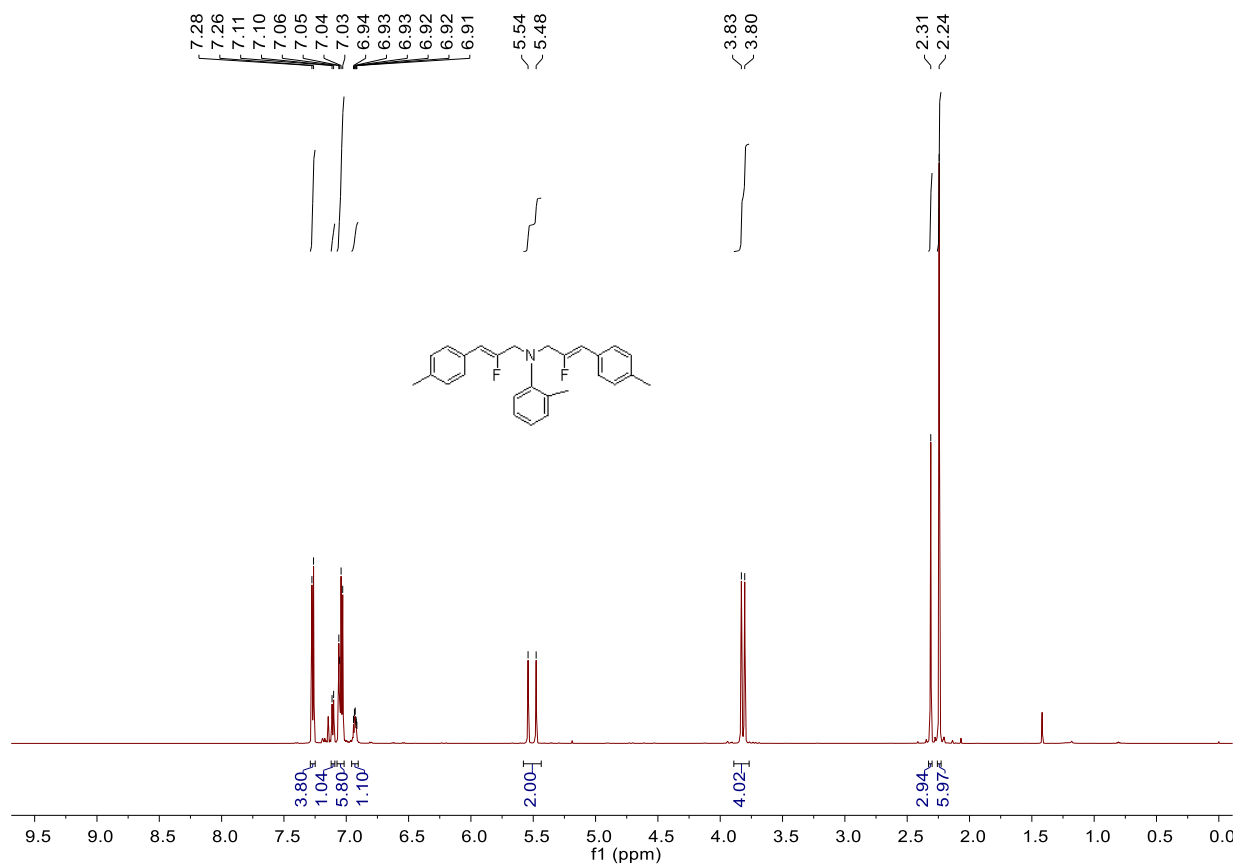

<sup>19</sup>F NMR (d18)

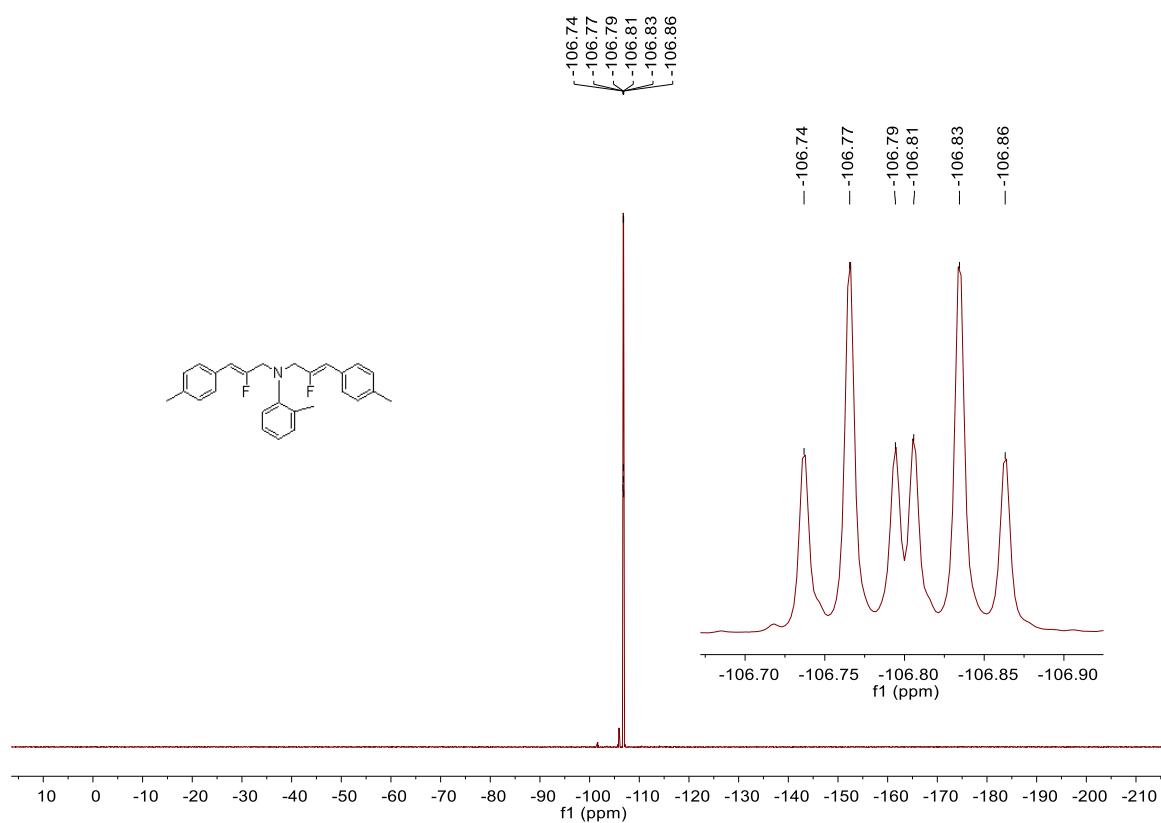

<sup>13</sup>C NMR (d18)

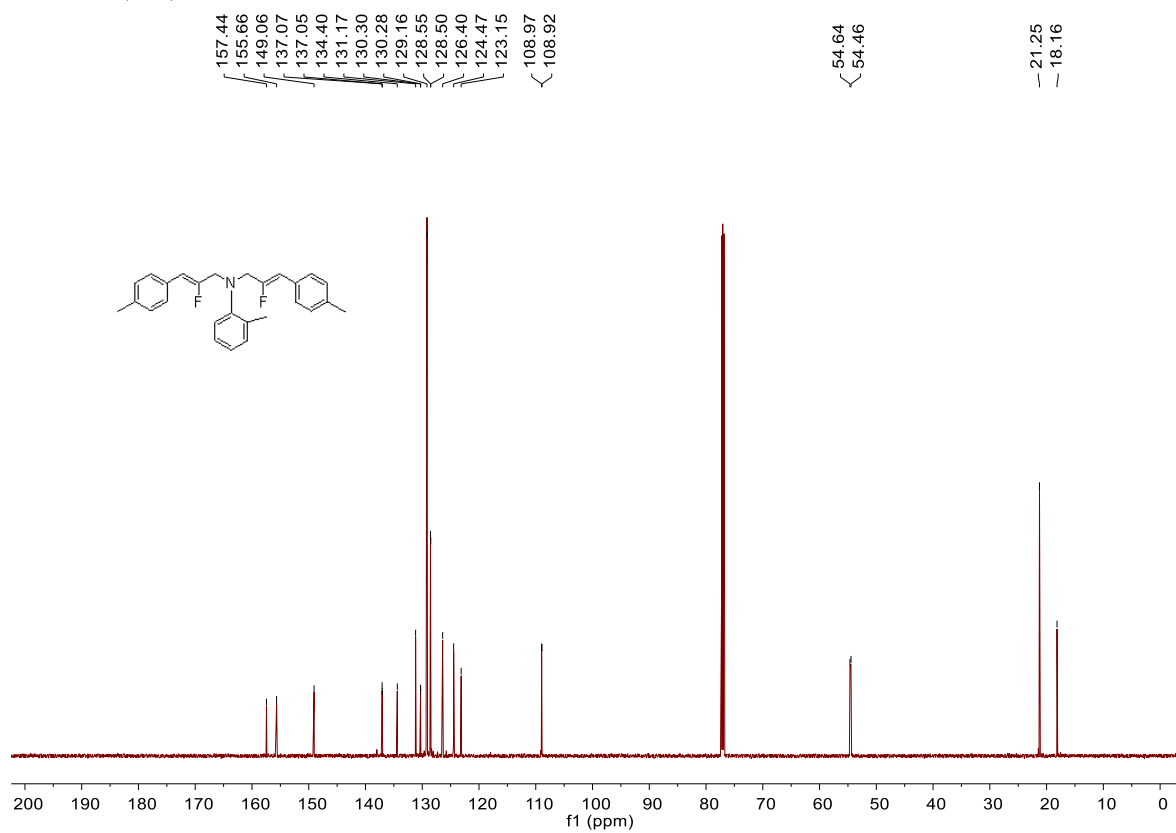

<sup>1</sup>H NMR (d19)

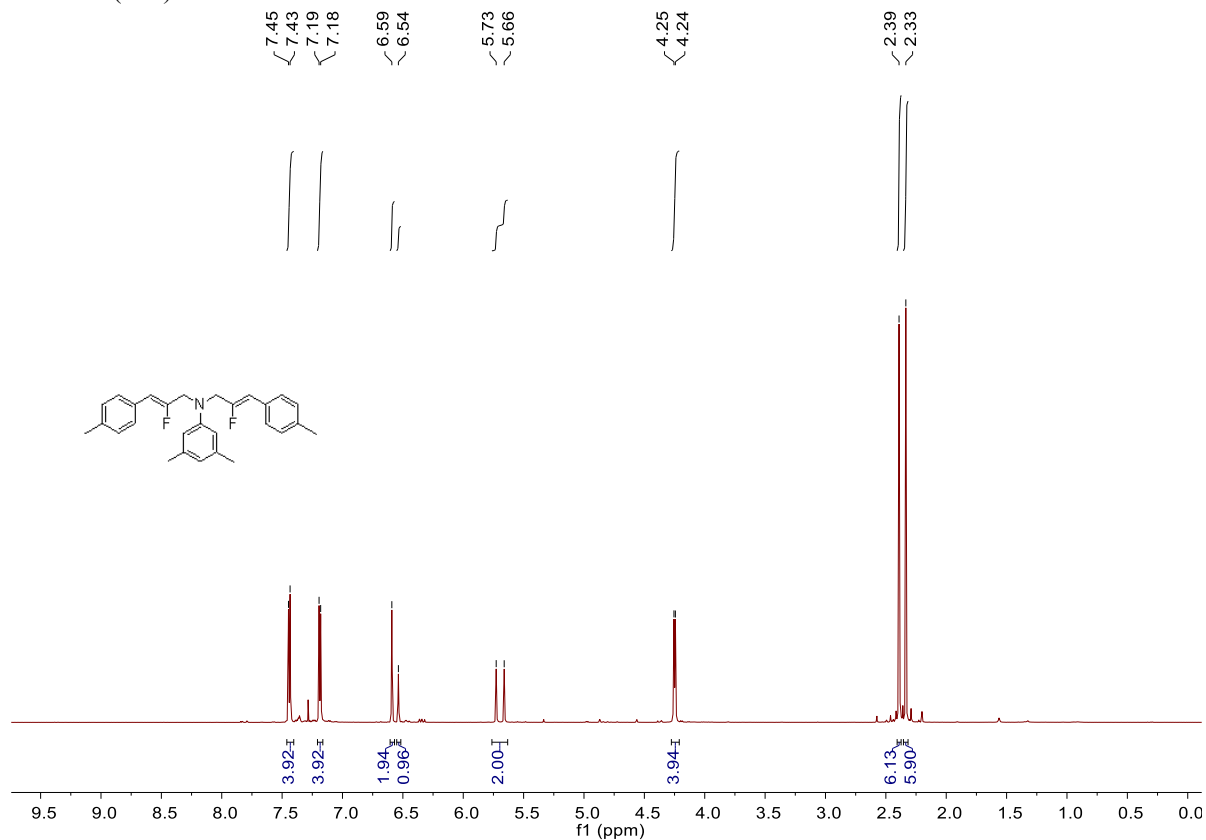

<sup>19</sup>F NMR (d19)

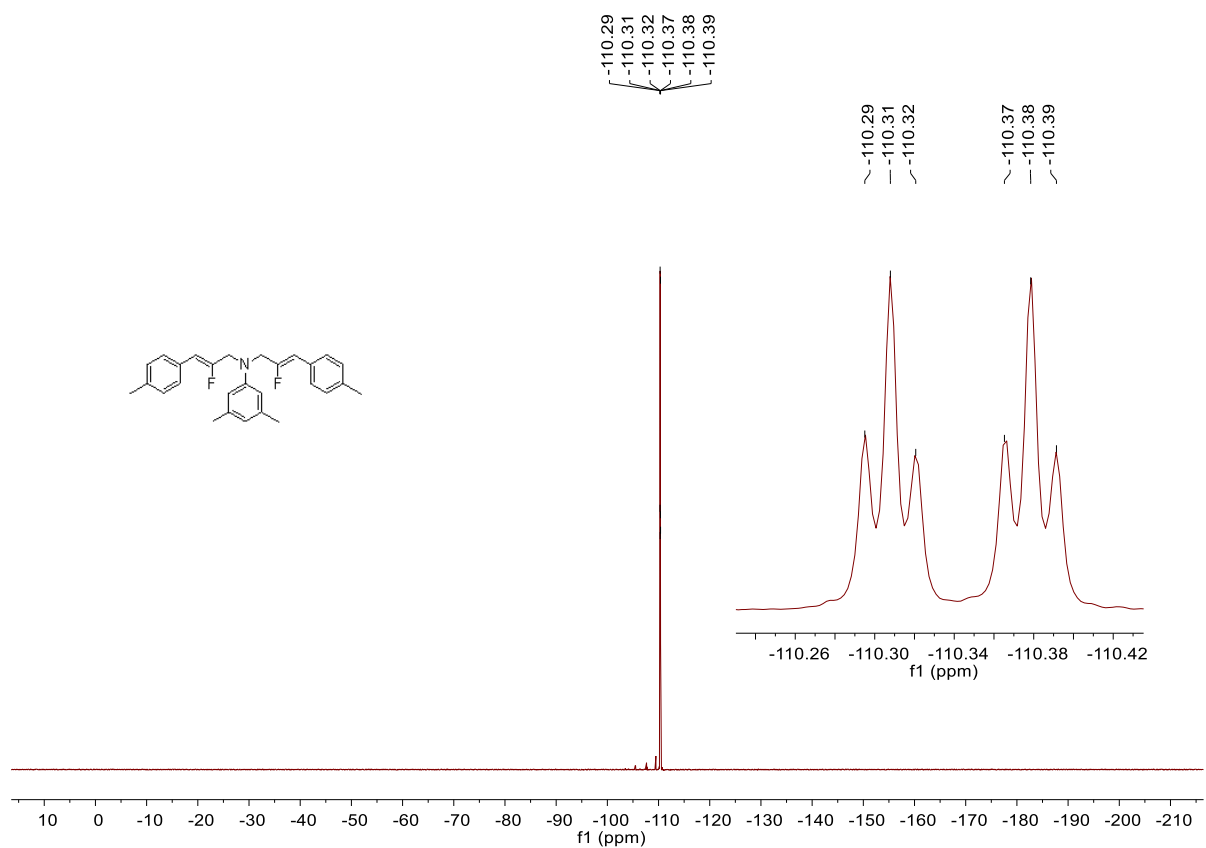



<sup>13</sup>C NMR (d19)

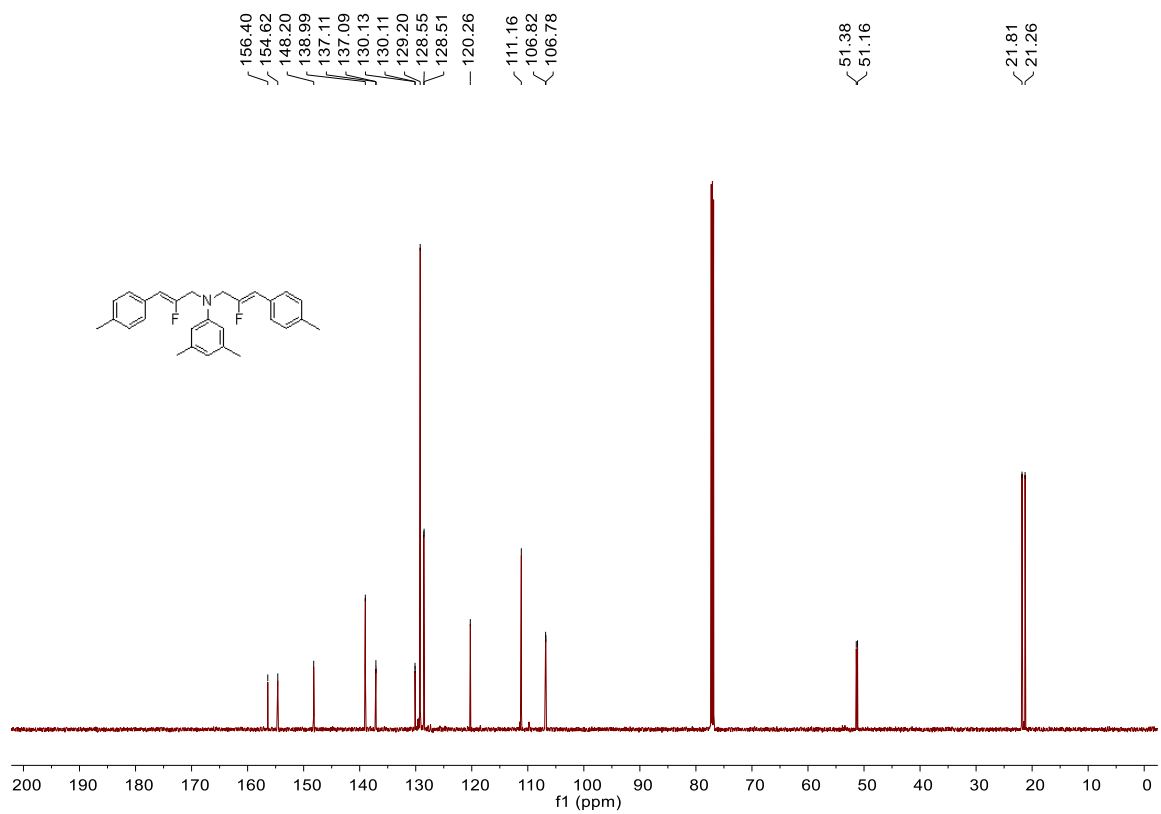

<sup>1</sup>H NMR (d20)

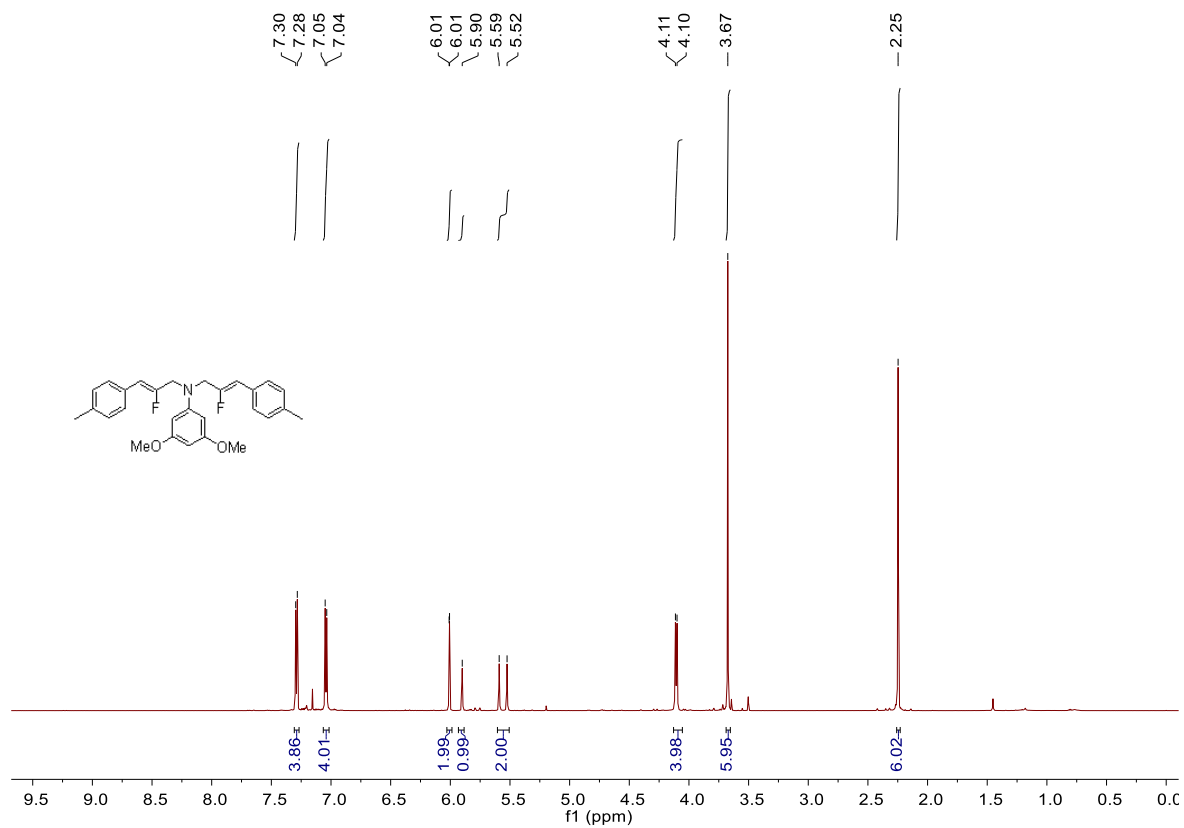

<sup>19</sup>F NMR (d20)

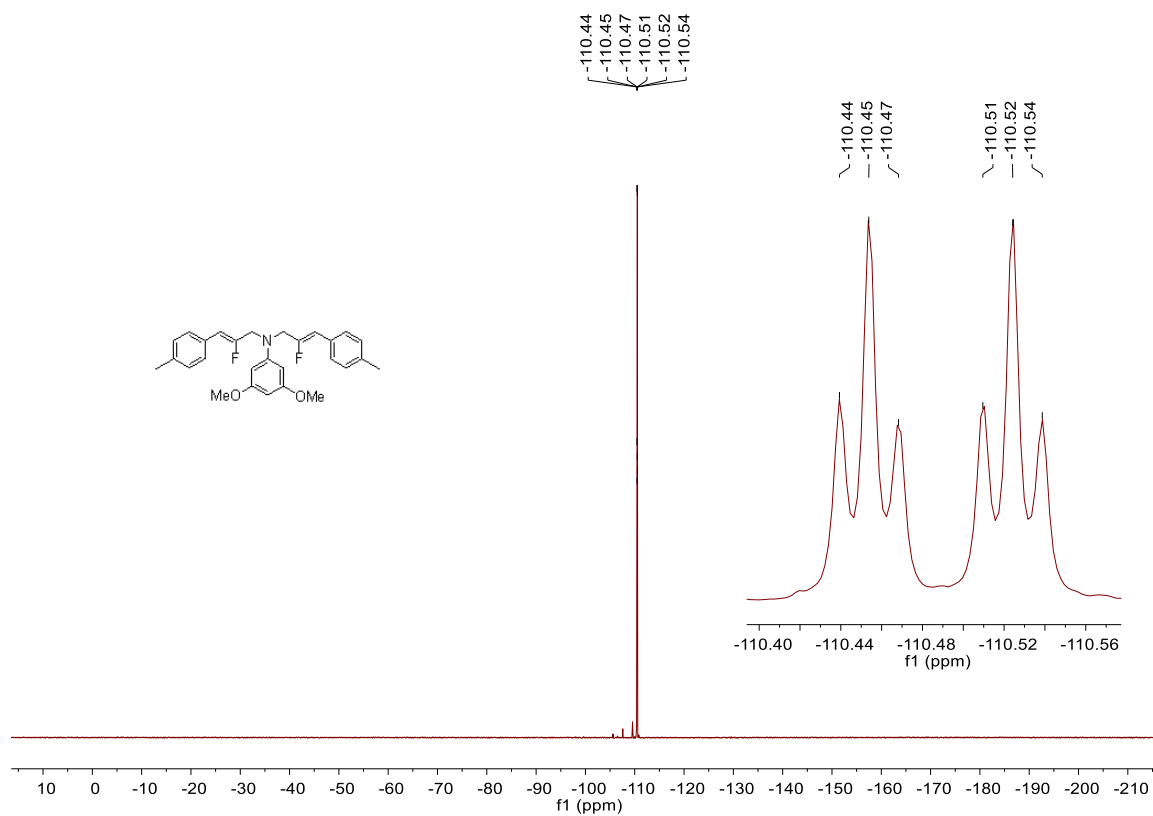

<sup>13</sup>C NMR (d20)

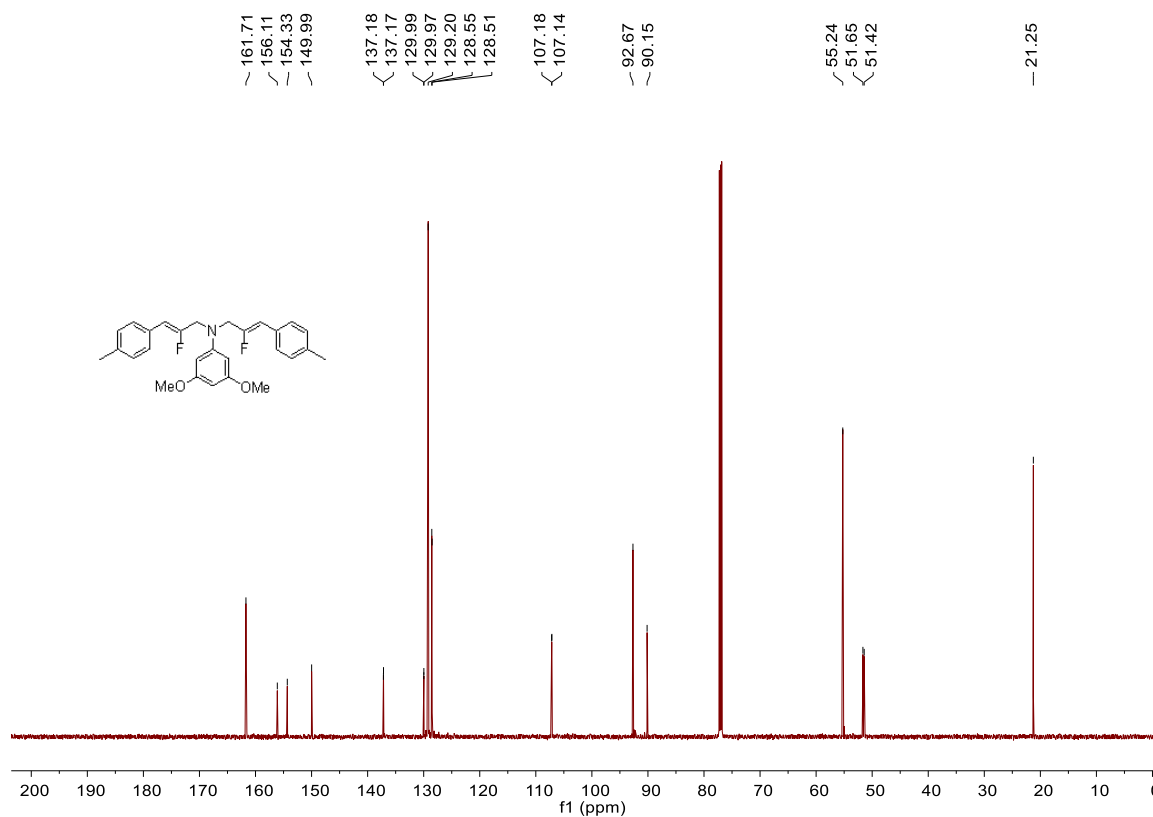

<sup>1</sup>H NMR (d21)

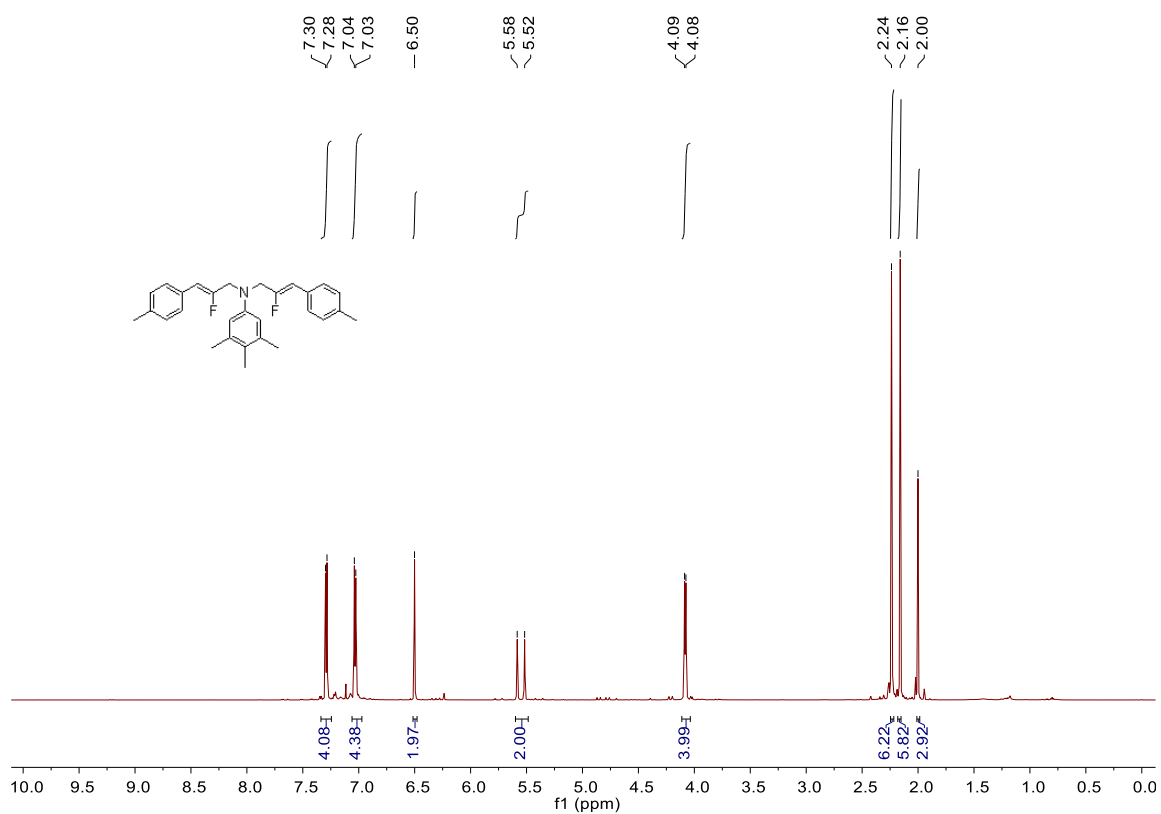

<sup>19</sup>F NMR (d21)

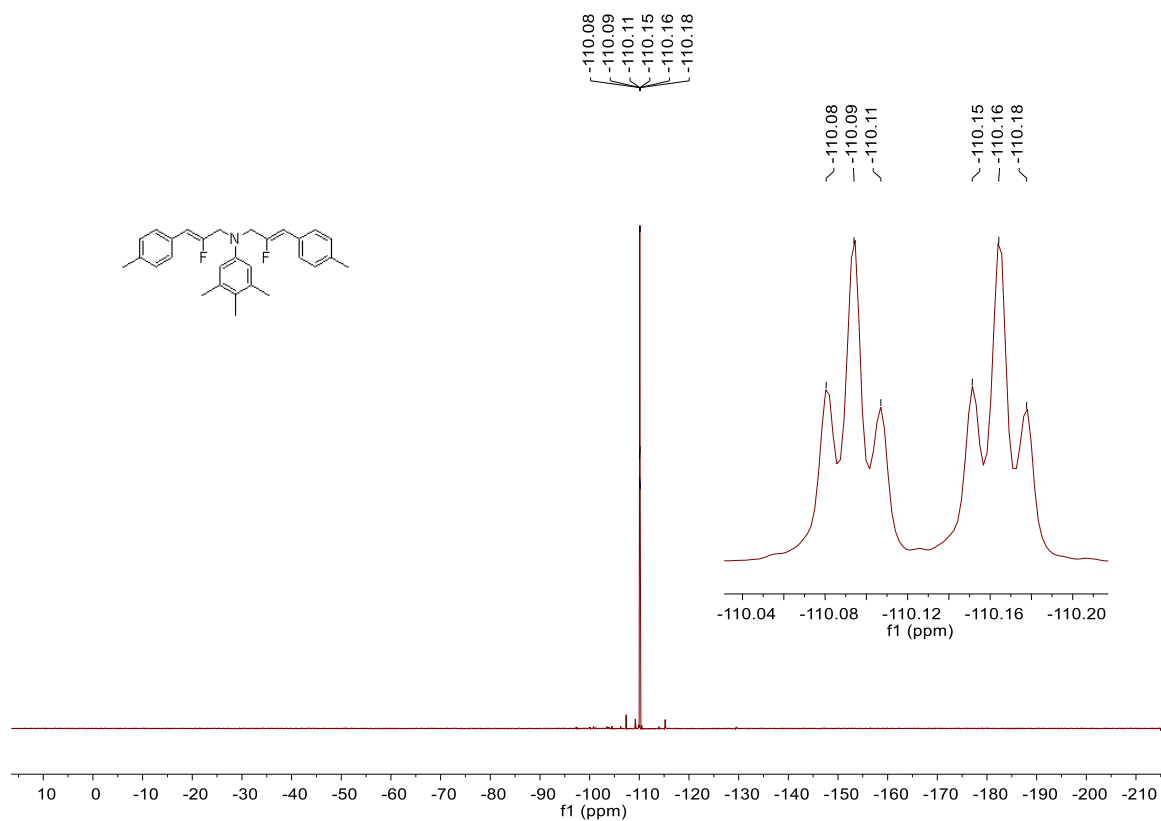

<sup>13</sup>C NMR (d21)

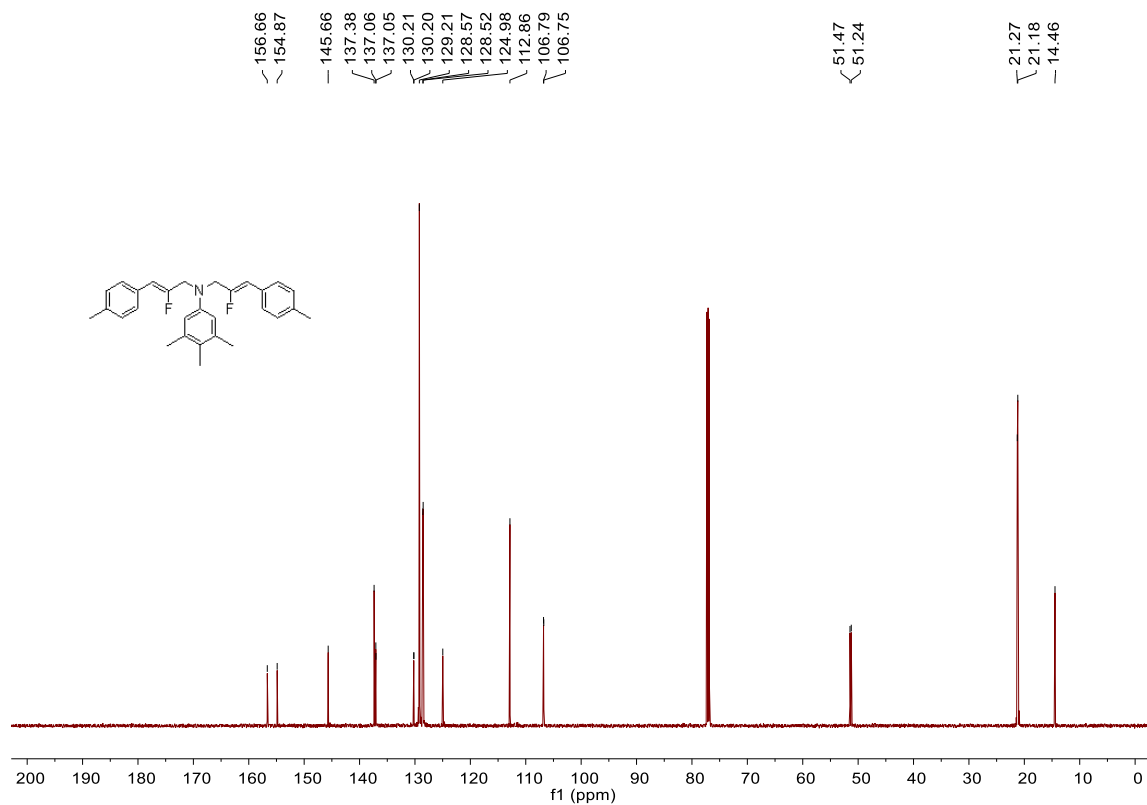

<sup>1</sup>H NMR (d22)

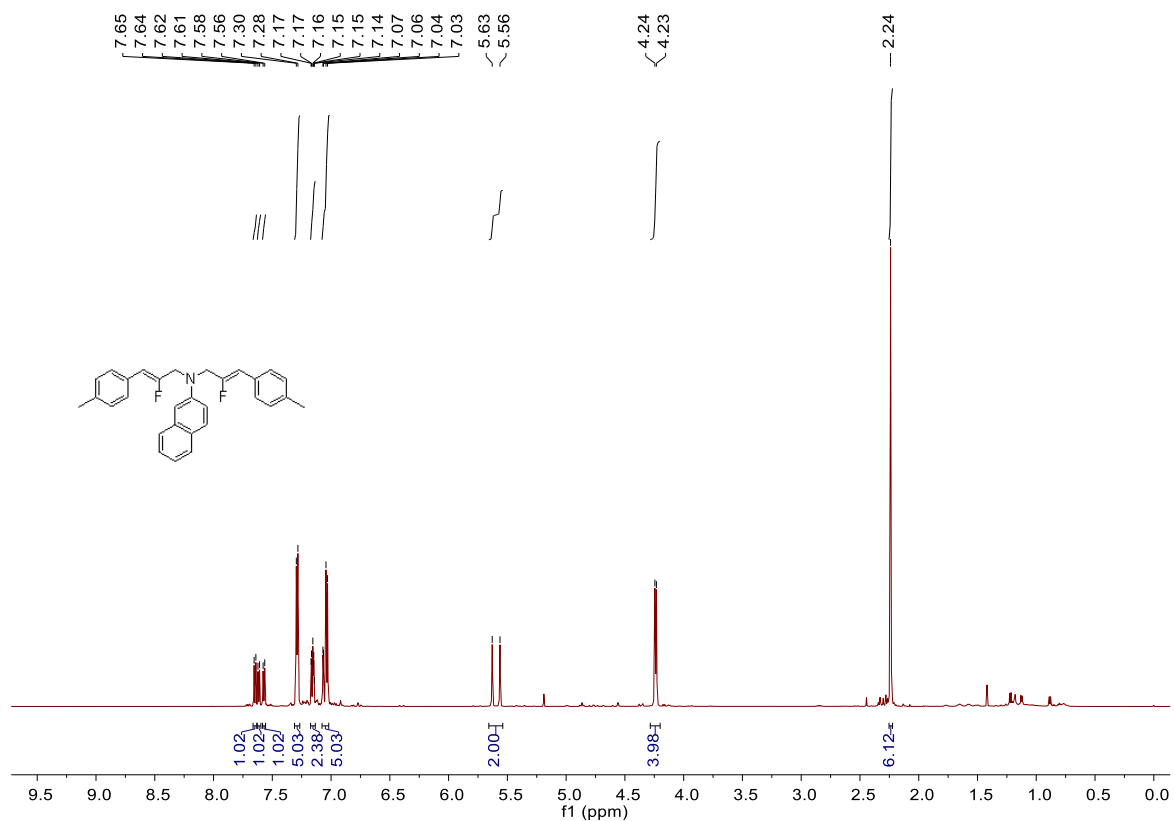

<sup>19</sup>F NMR (d22)

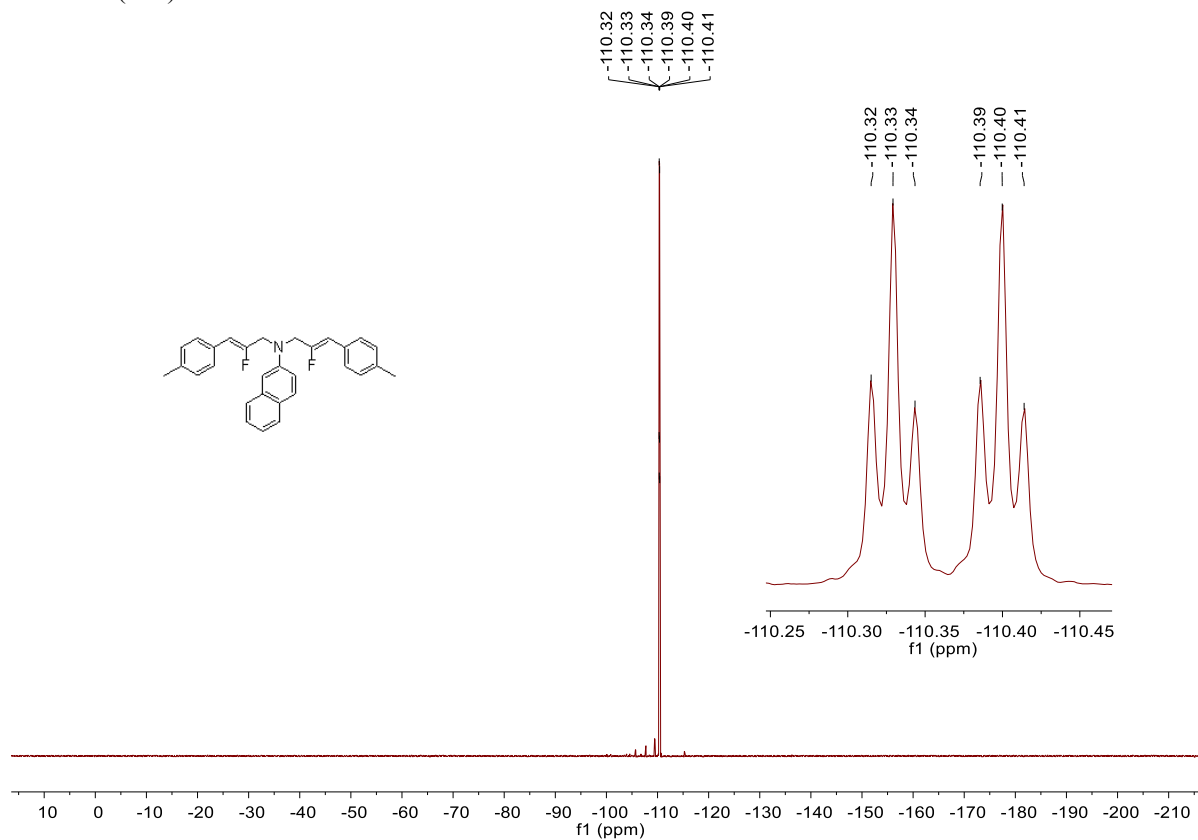

<sup>13</sup>C NMR (d22)

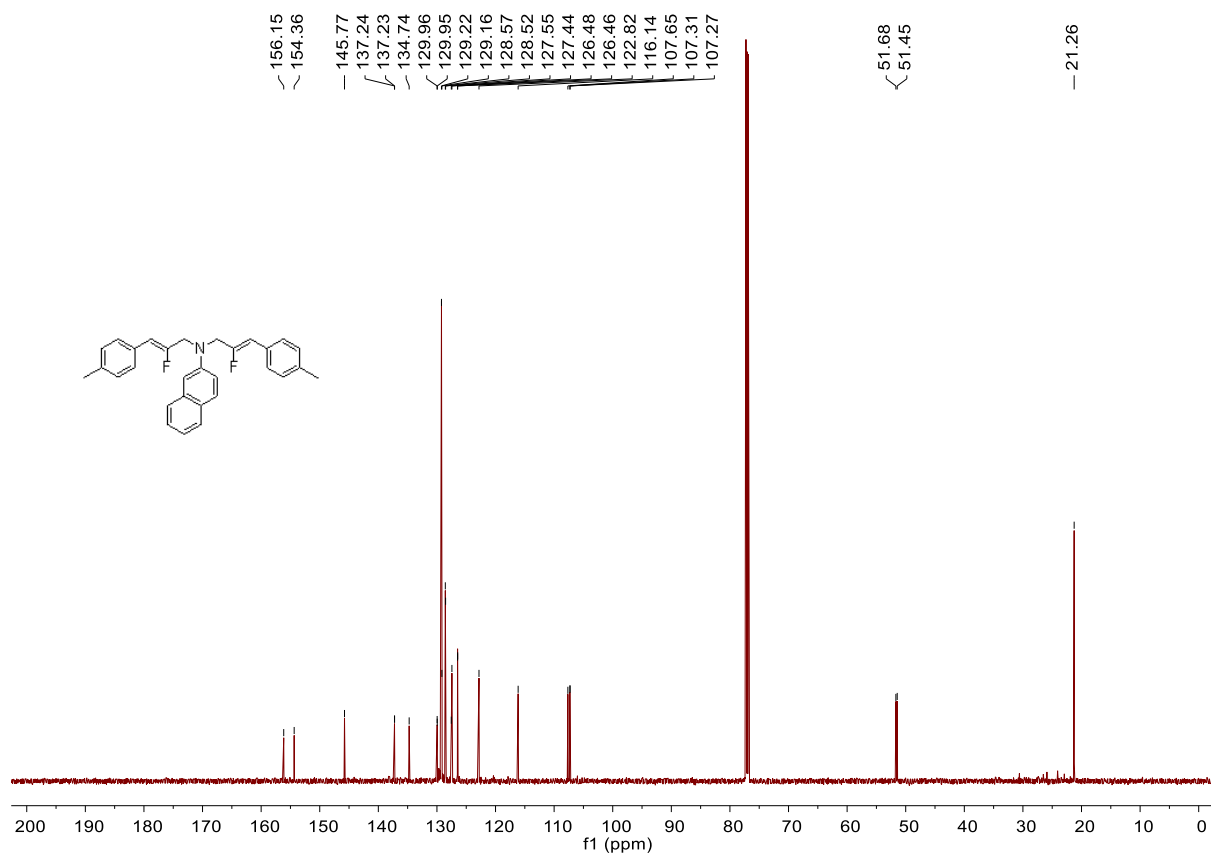

<sup>1</sup>H NMR (d23)

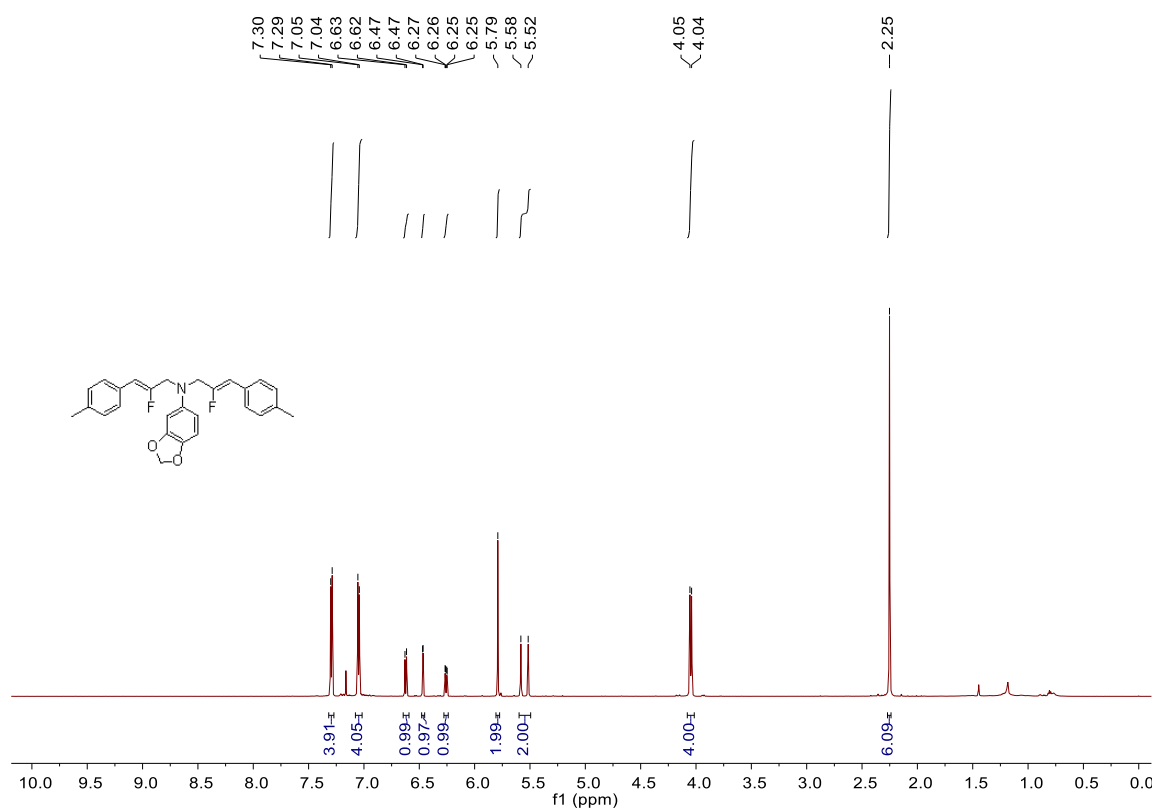

<sup>19</sup>F NMR (d23)

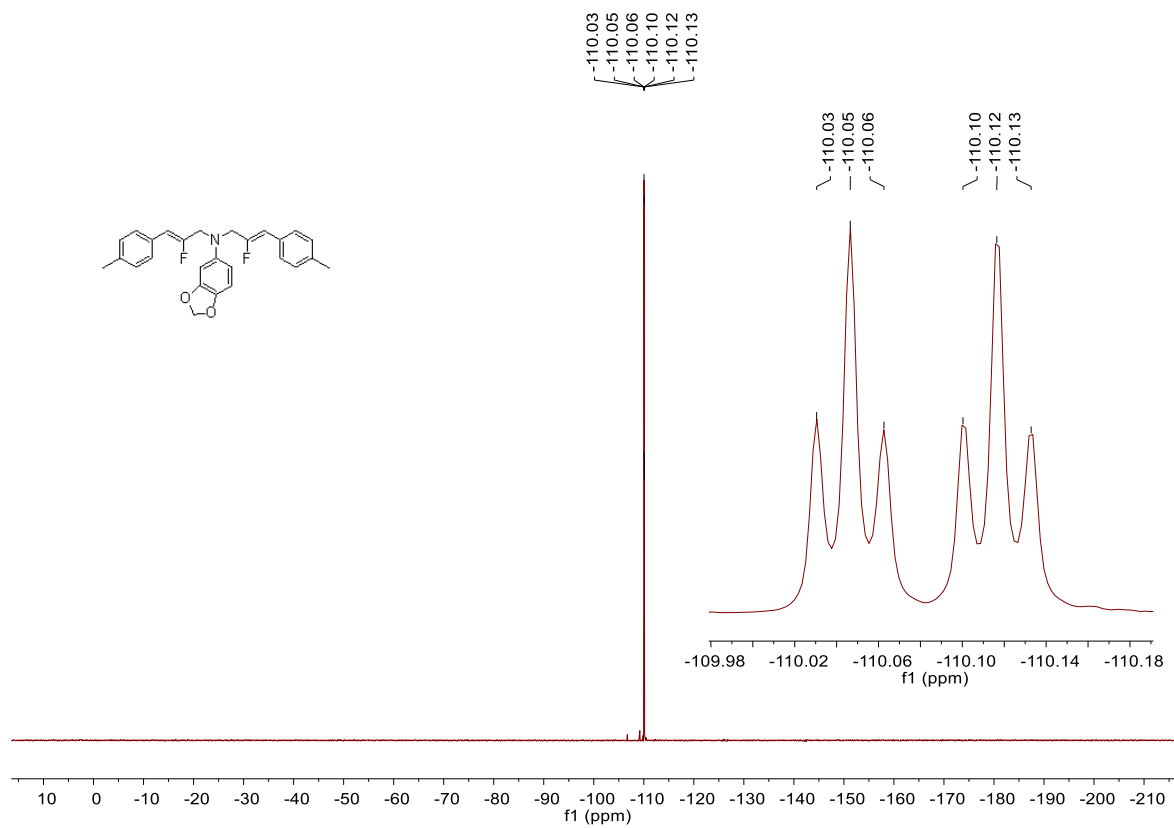

<sup>13</sup>C NMR (d23)

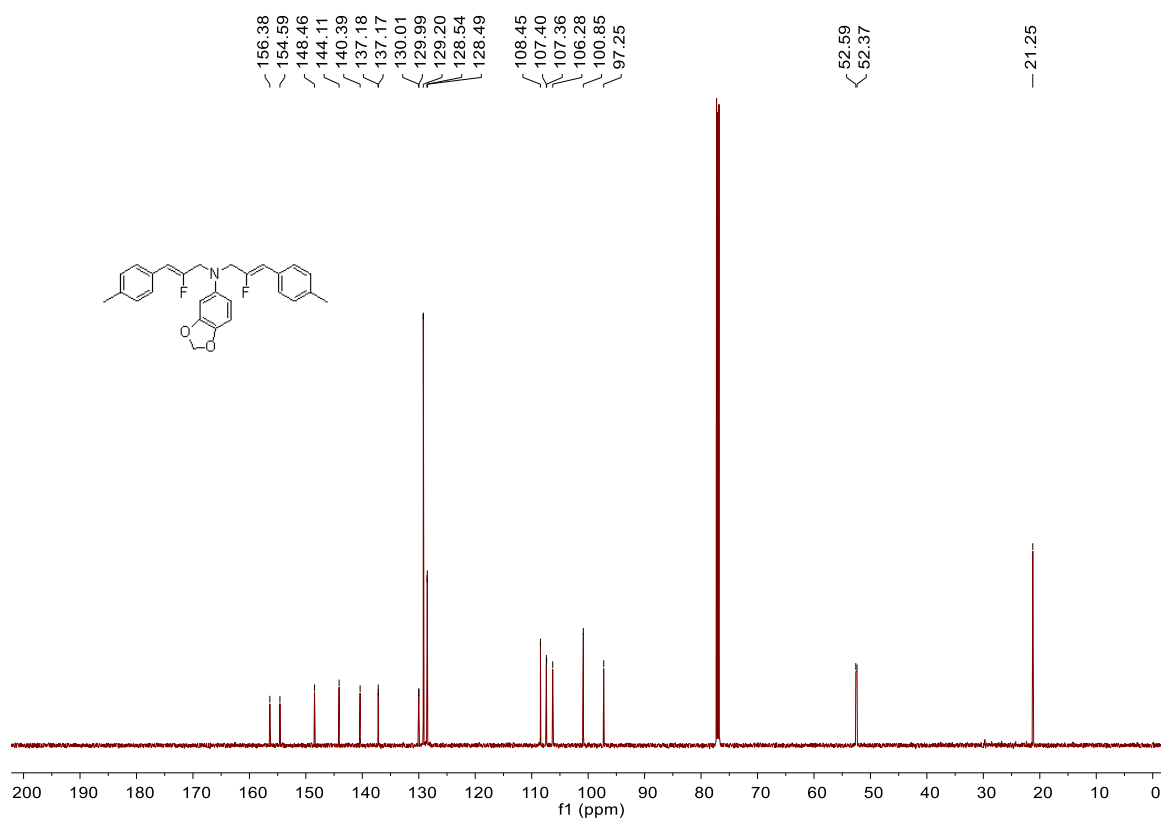

<sup>1</sup>H NMR (d24)

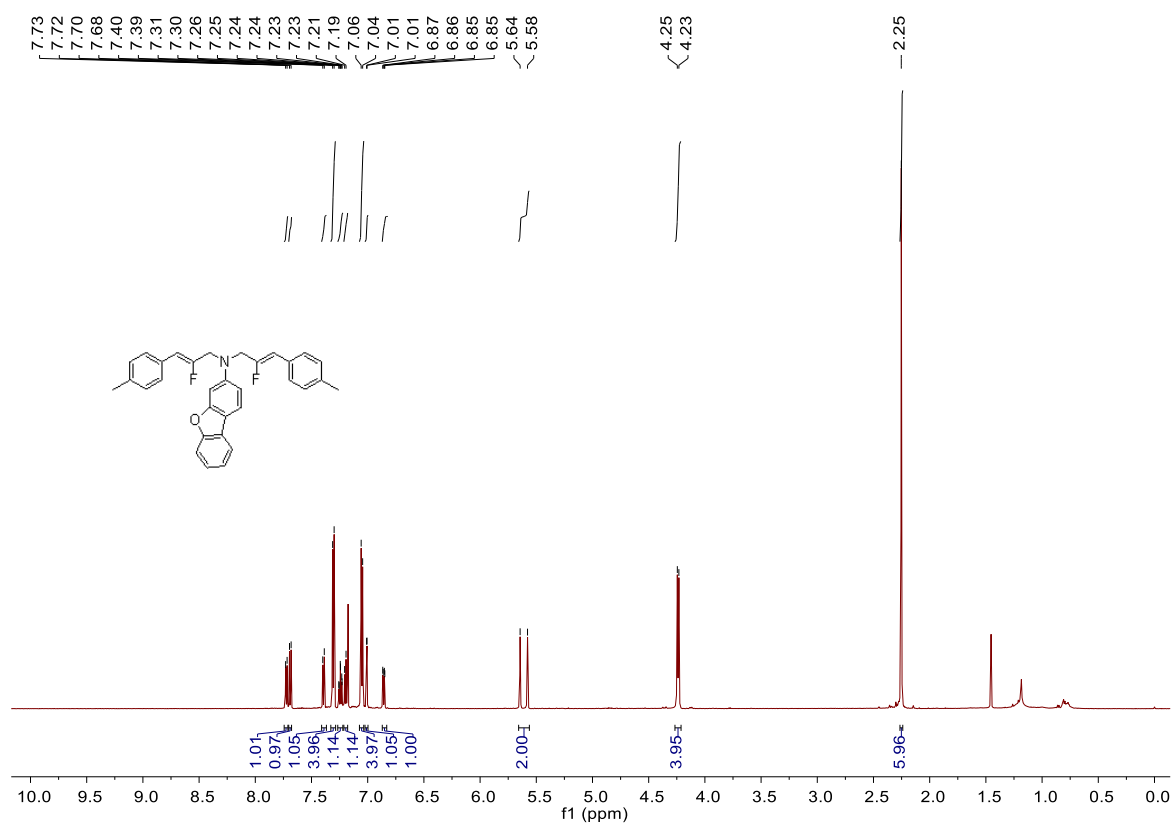

<sup>19</sup>F NMR (d24)

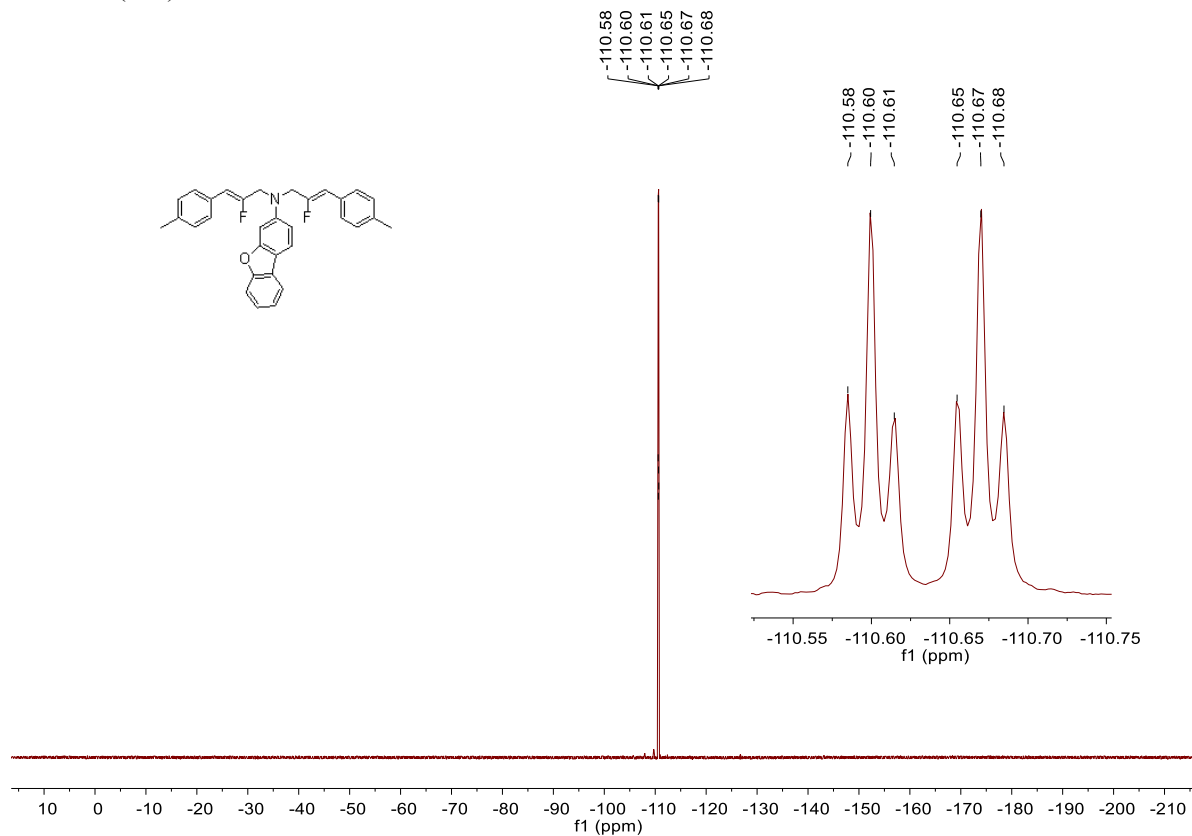

<sup>13</sup>C NMR (d24)

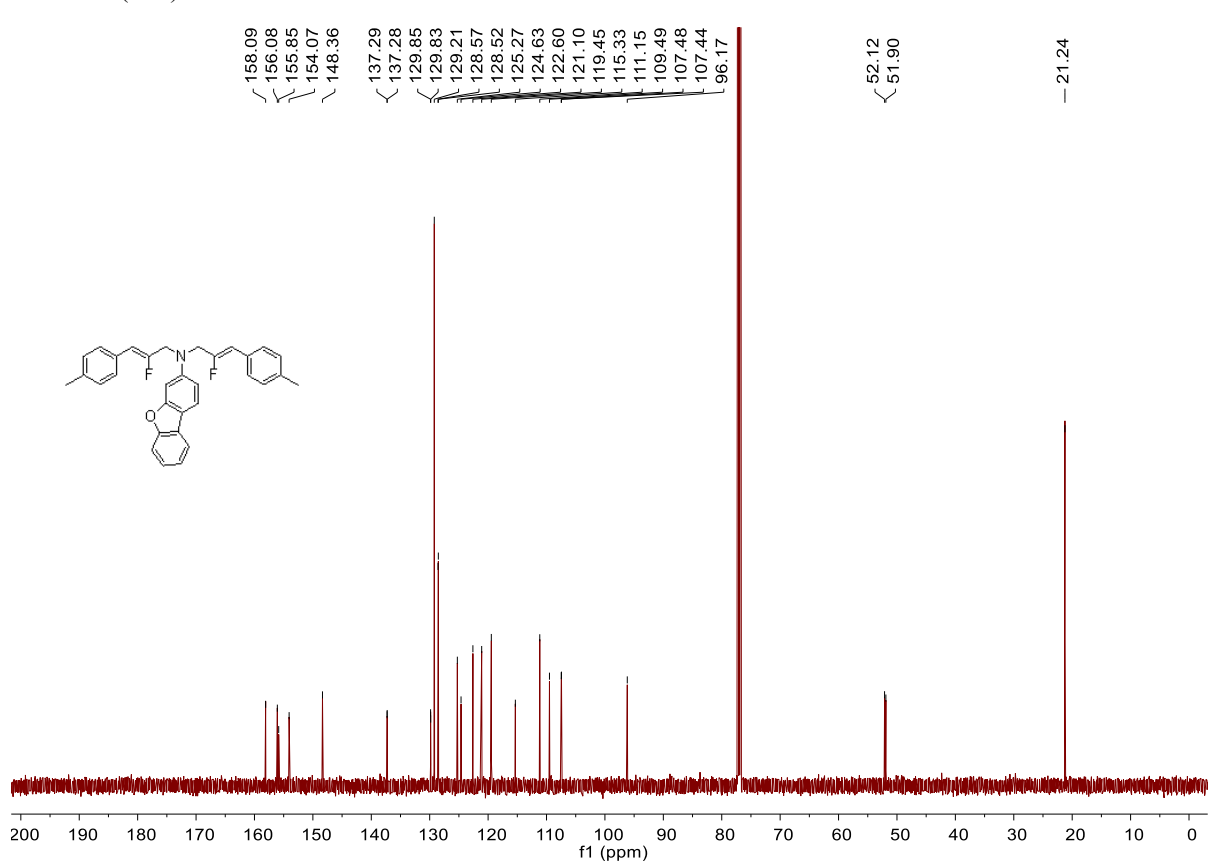



<sup>1</sup>H NMR (d25)

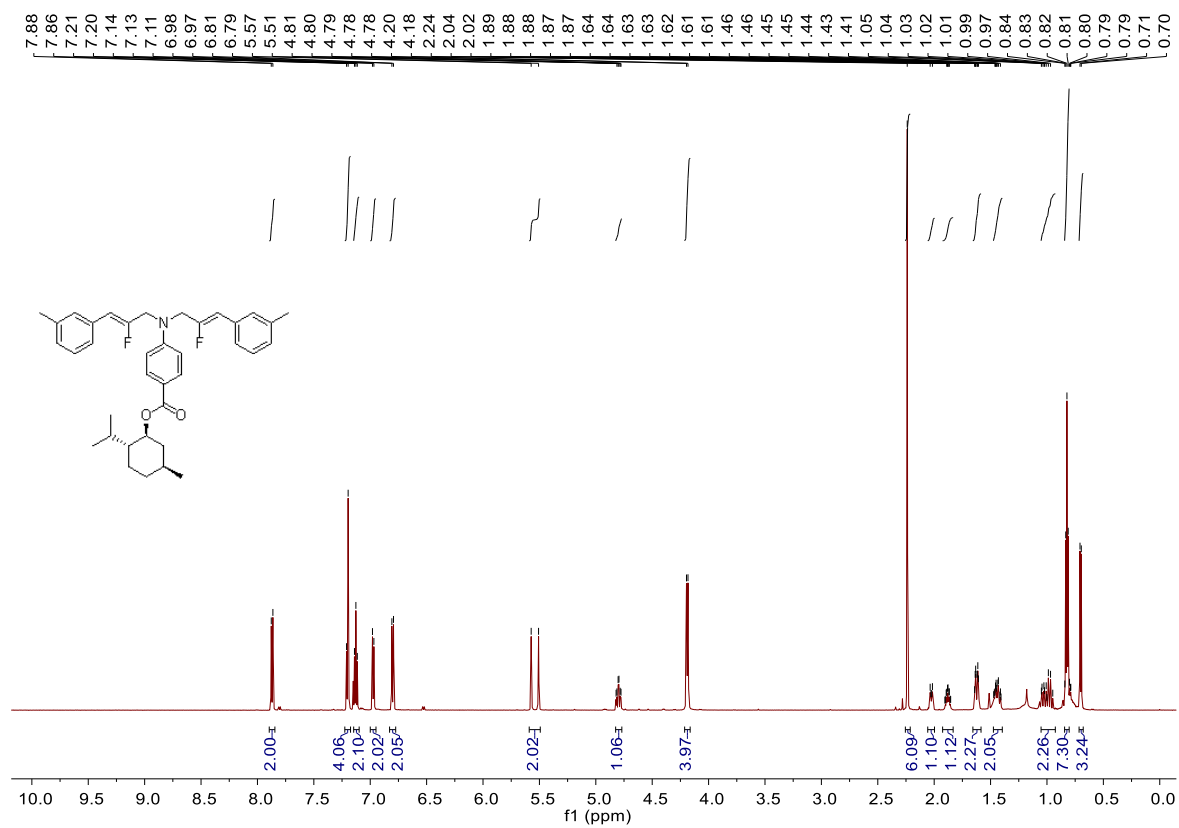

<sup>19</sup>F NMR (d25)

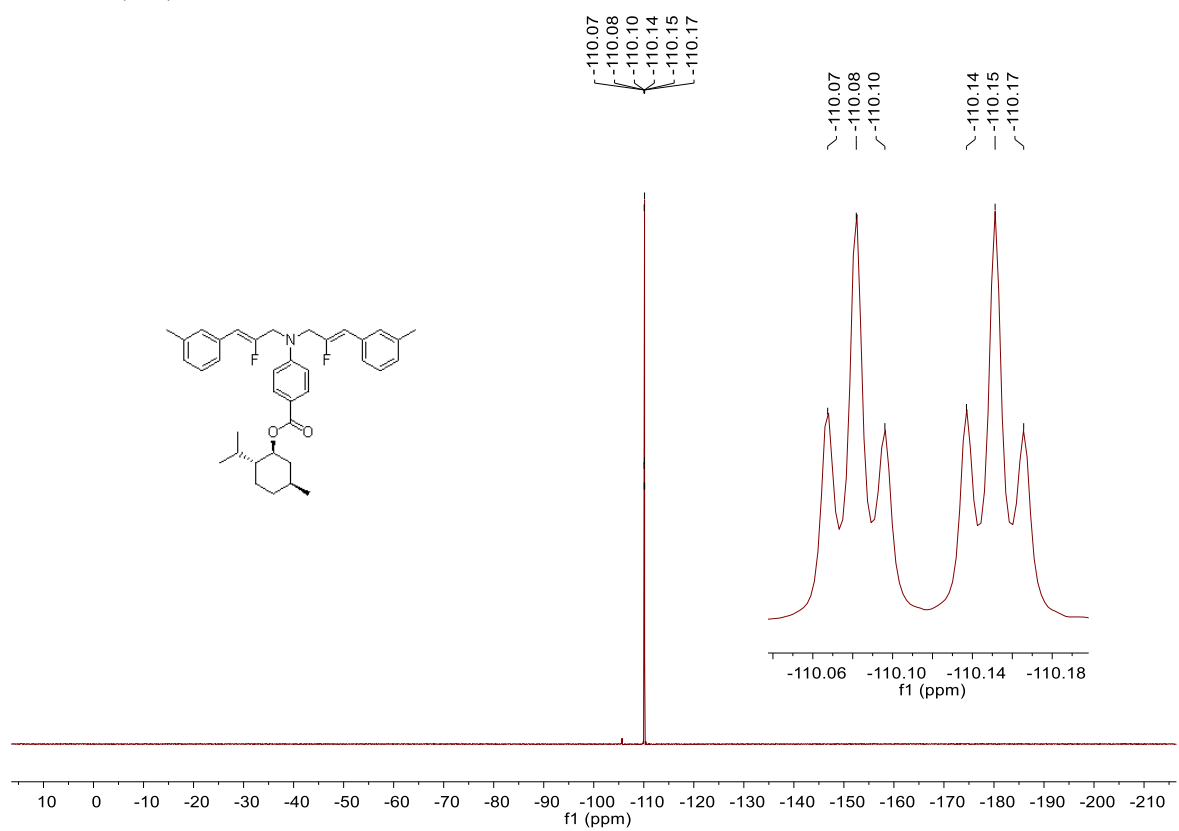



<sup>19</sup>F NMR (d26)

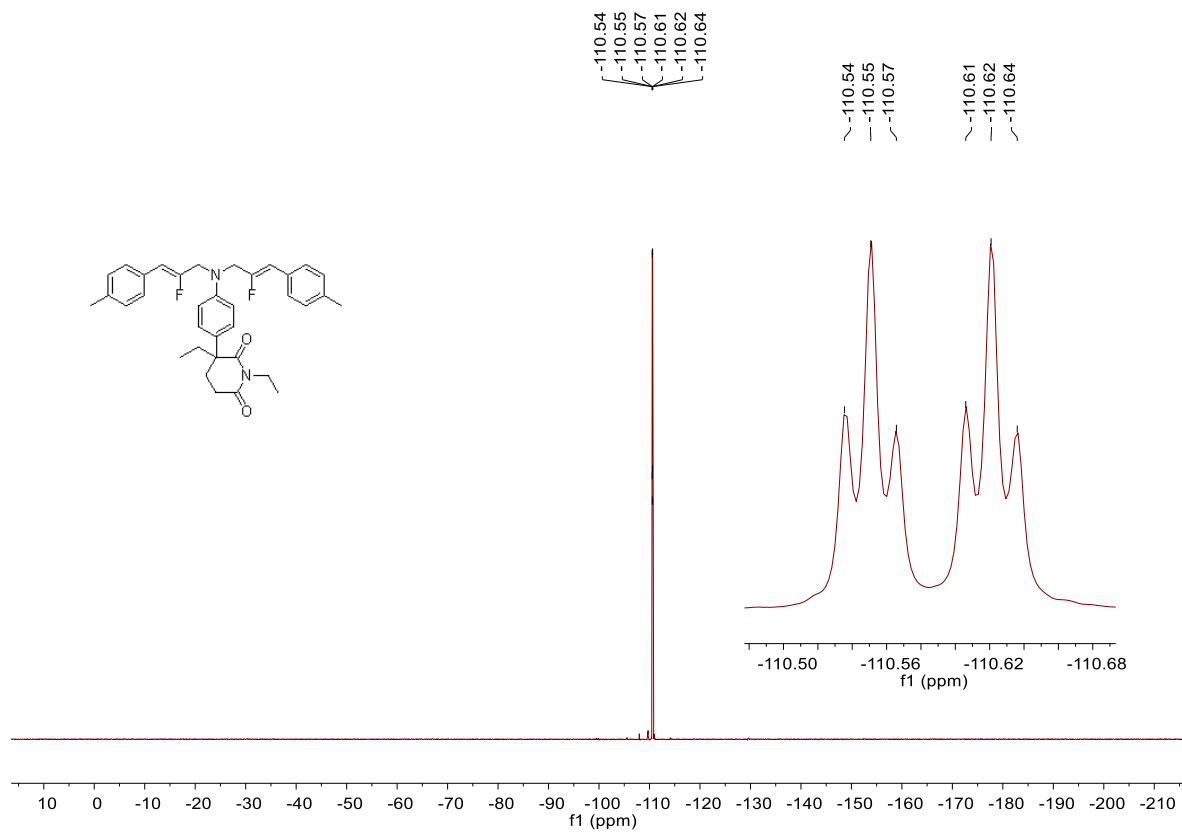

<sup>13</sup>C NMR (d26)

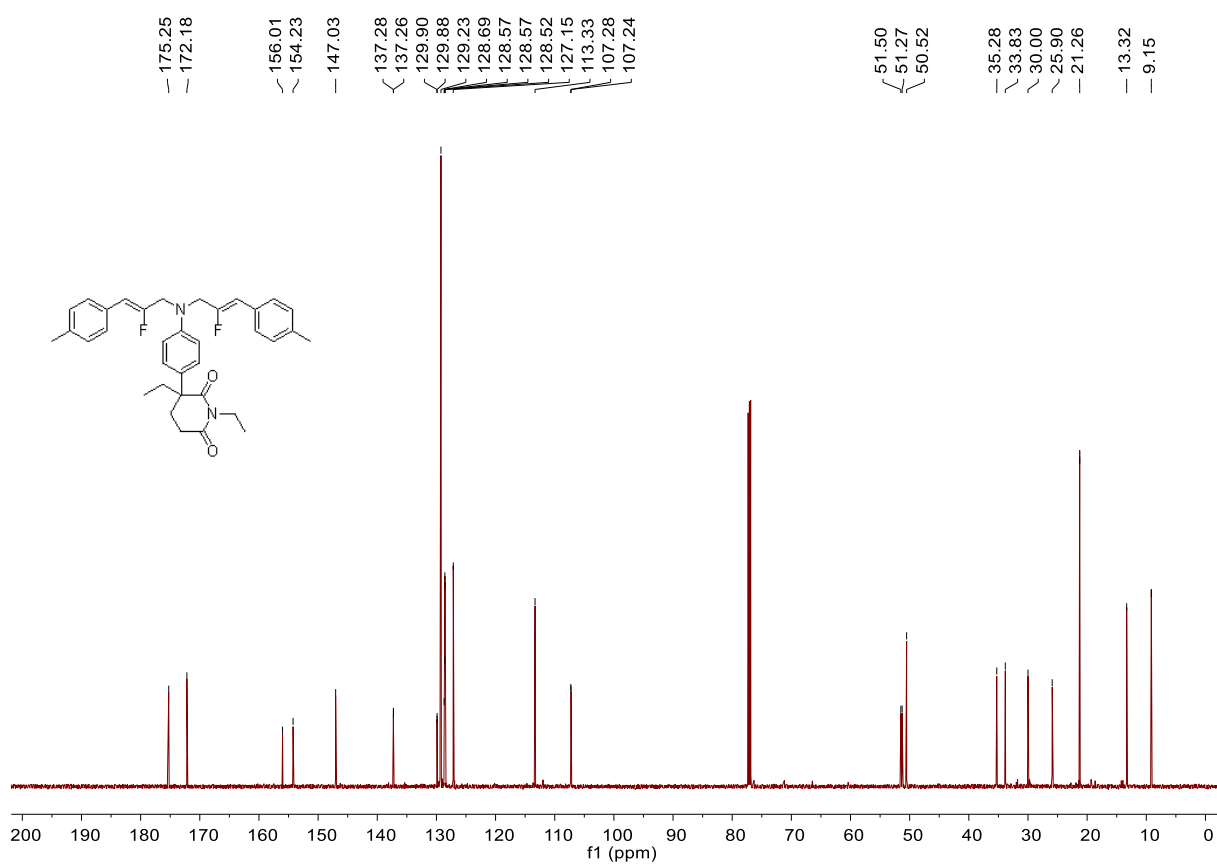

<sup>1</sup>H NMR (d27)

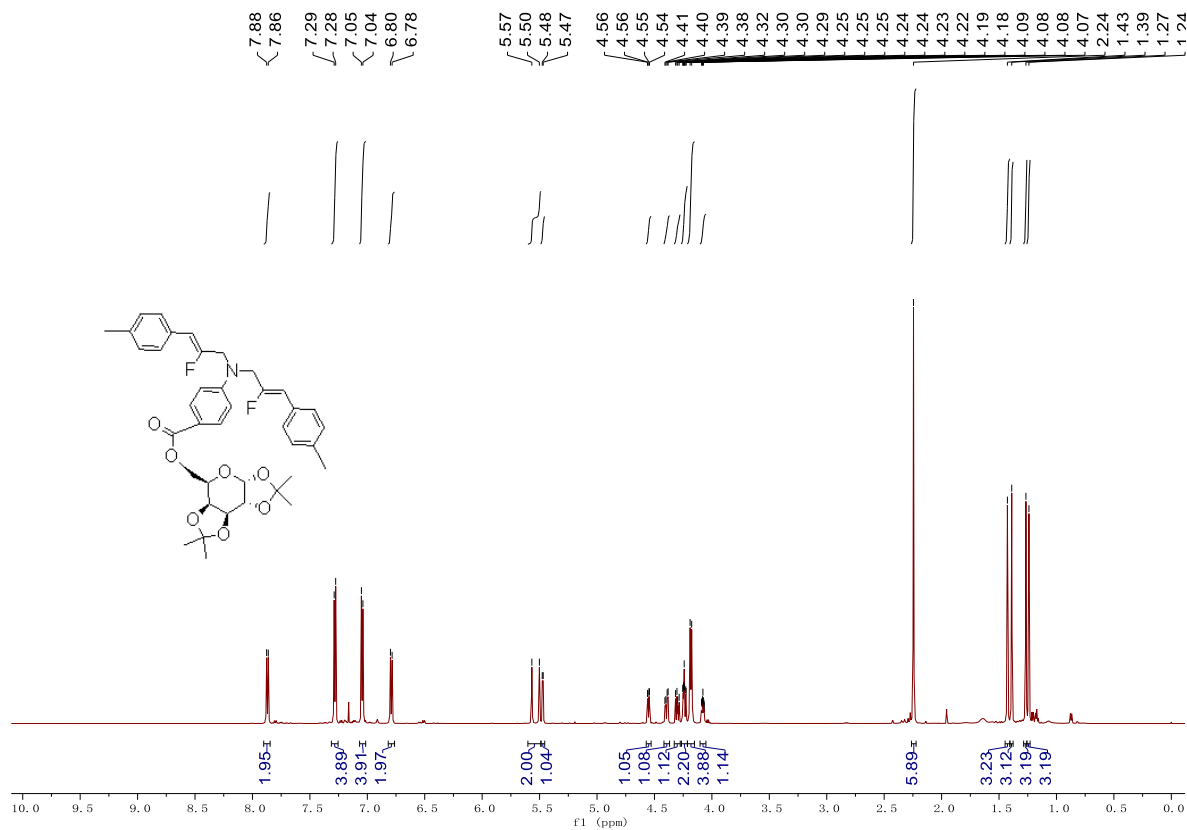

<sup>19</sup>F NMR (d27)

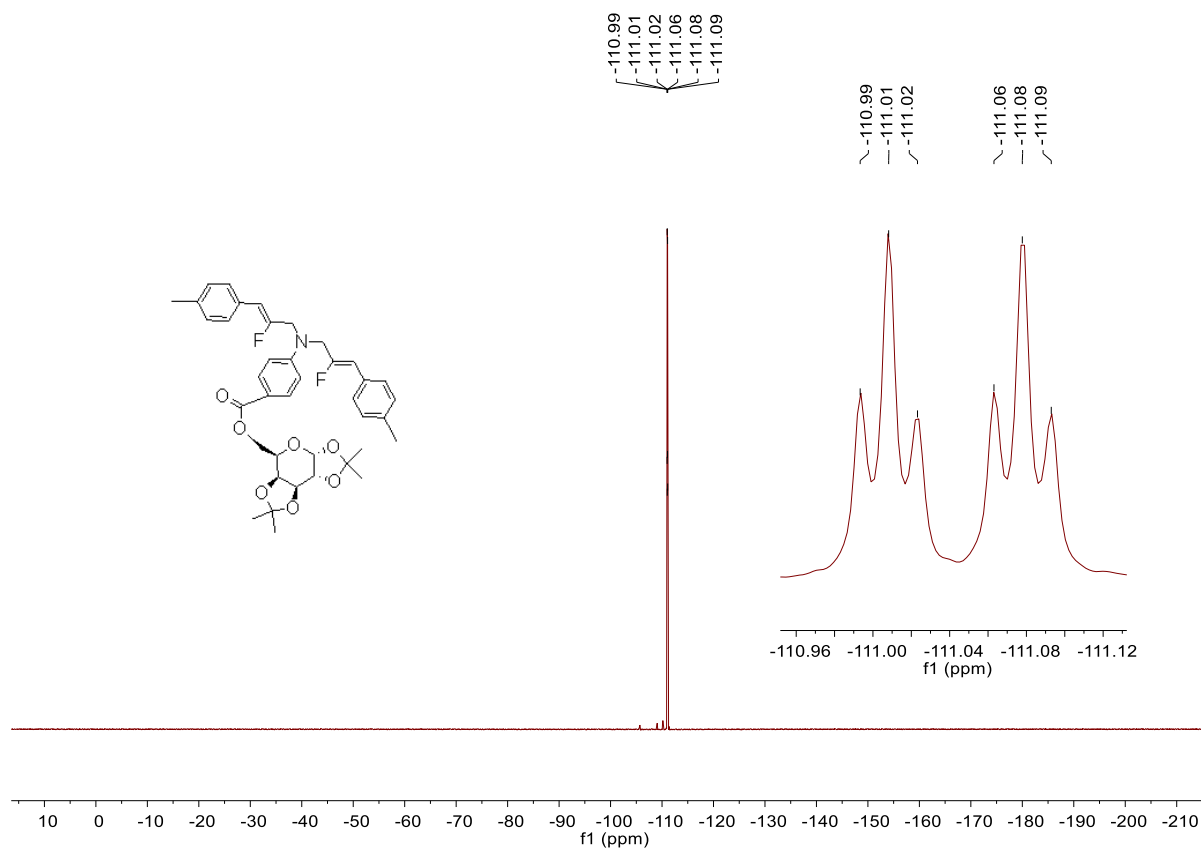

<sup>13</sup>C NMR (d27)

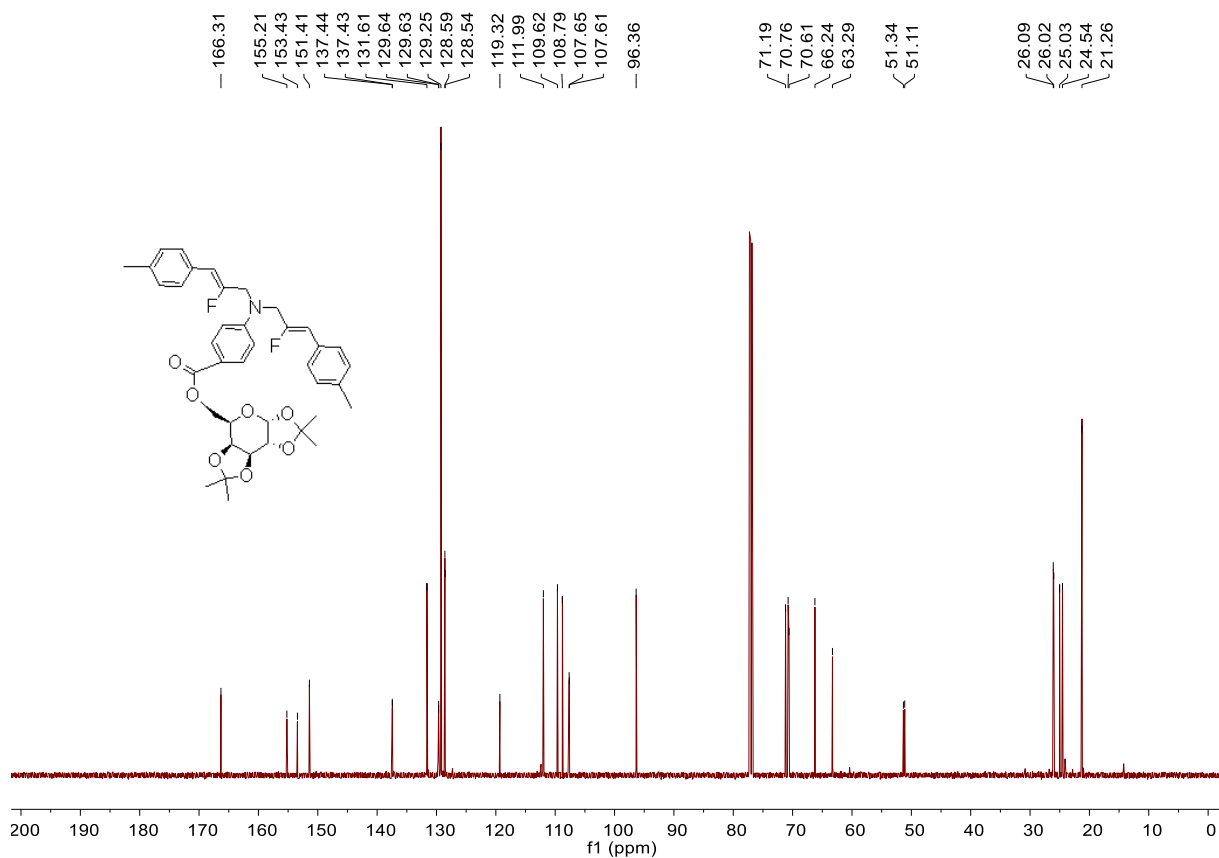

<sup>1</sup>H NMR (d28)

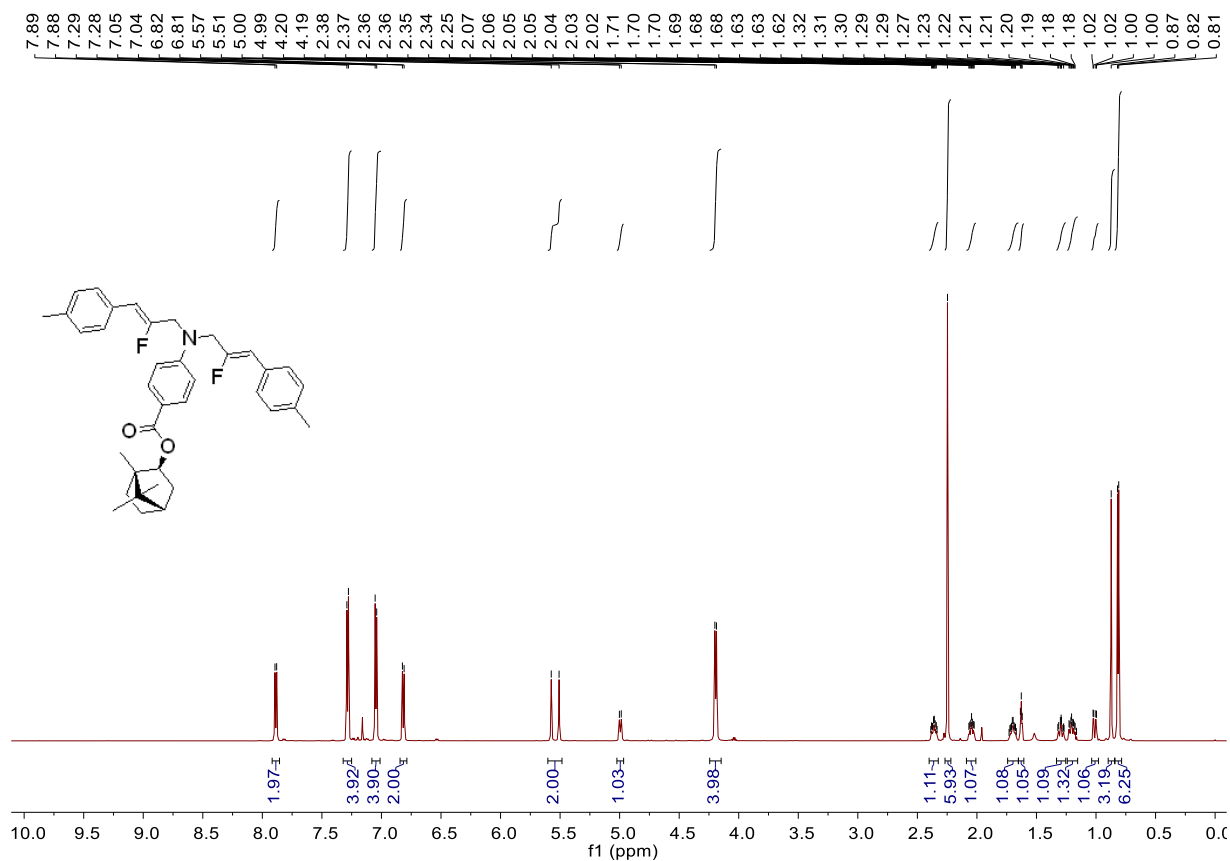

<sup>19</sup>F NMR (d28)

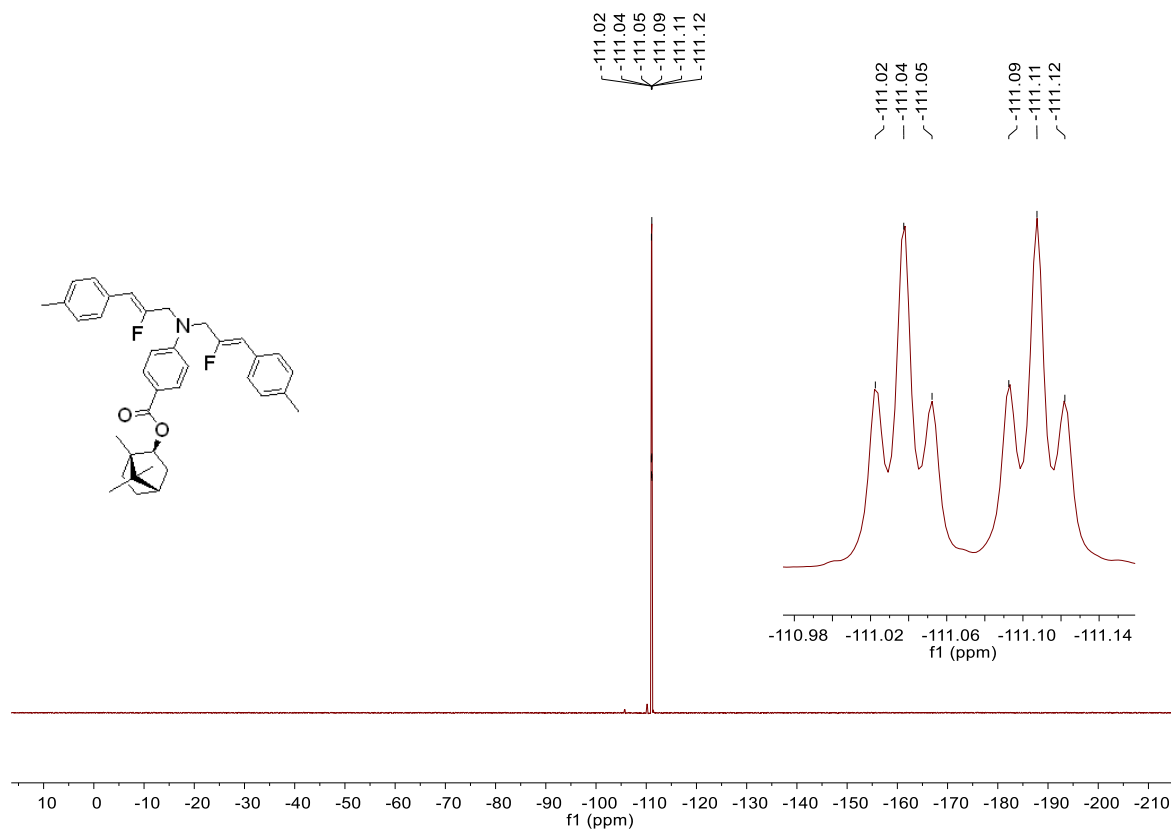

<sup>13</sup>C NMR (d28)

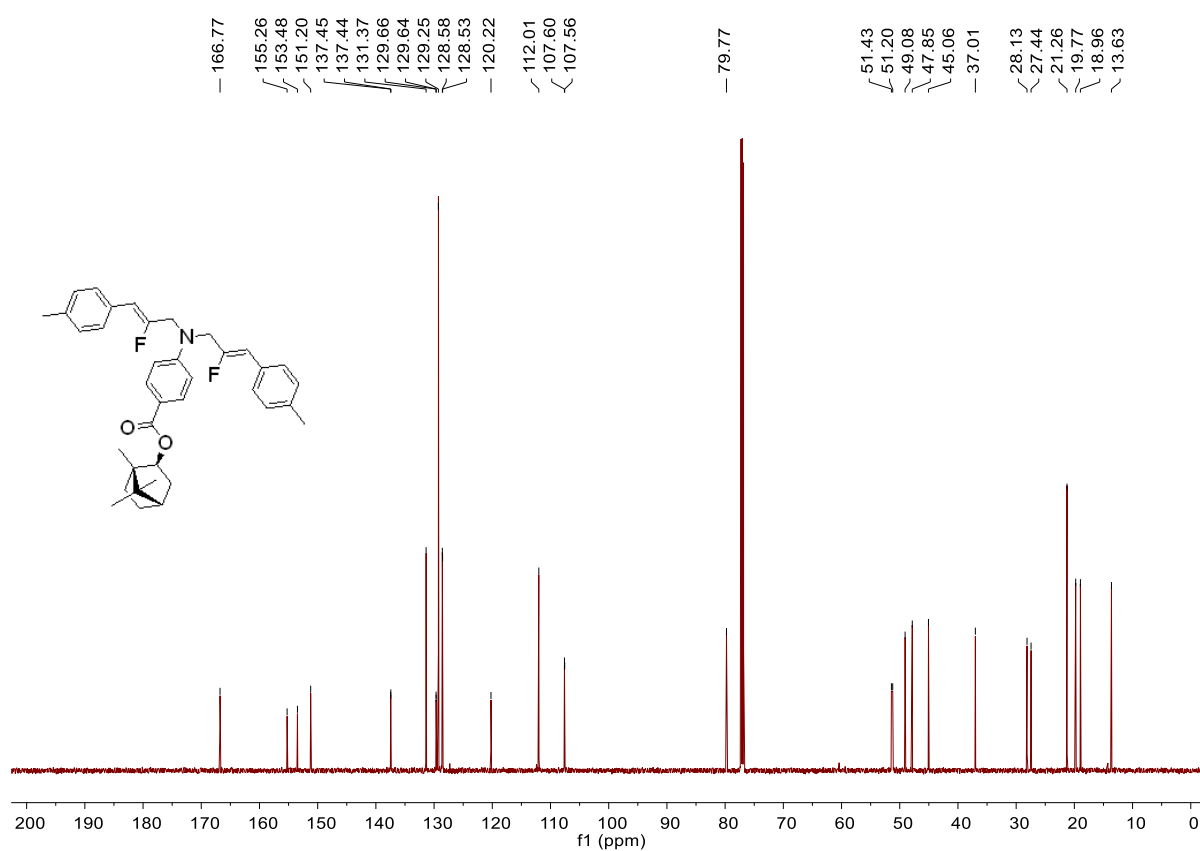

<sup>1</sup>H NMR (d29)

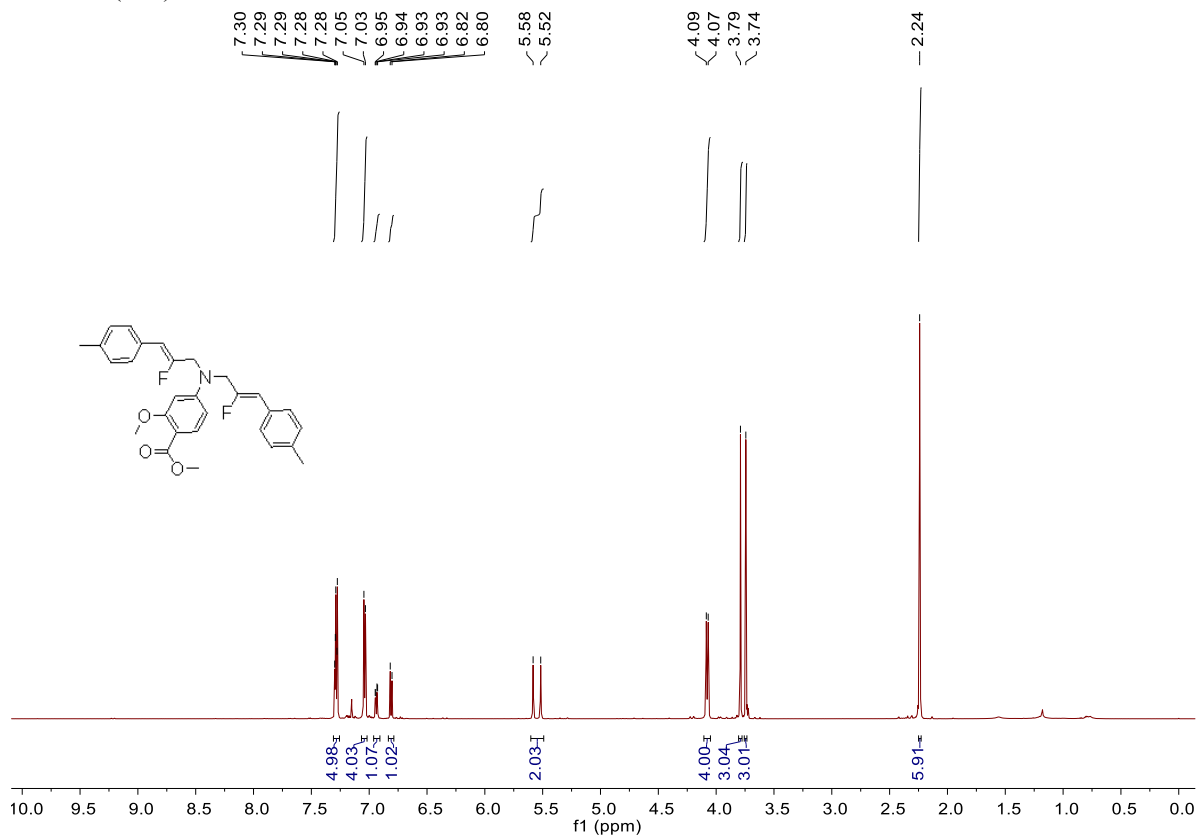

<sup>19</sup>F NMR (d29)

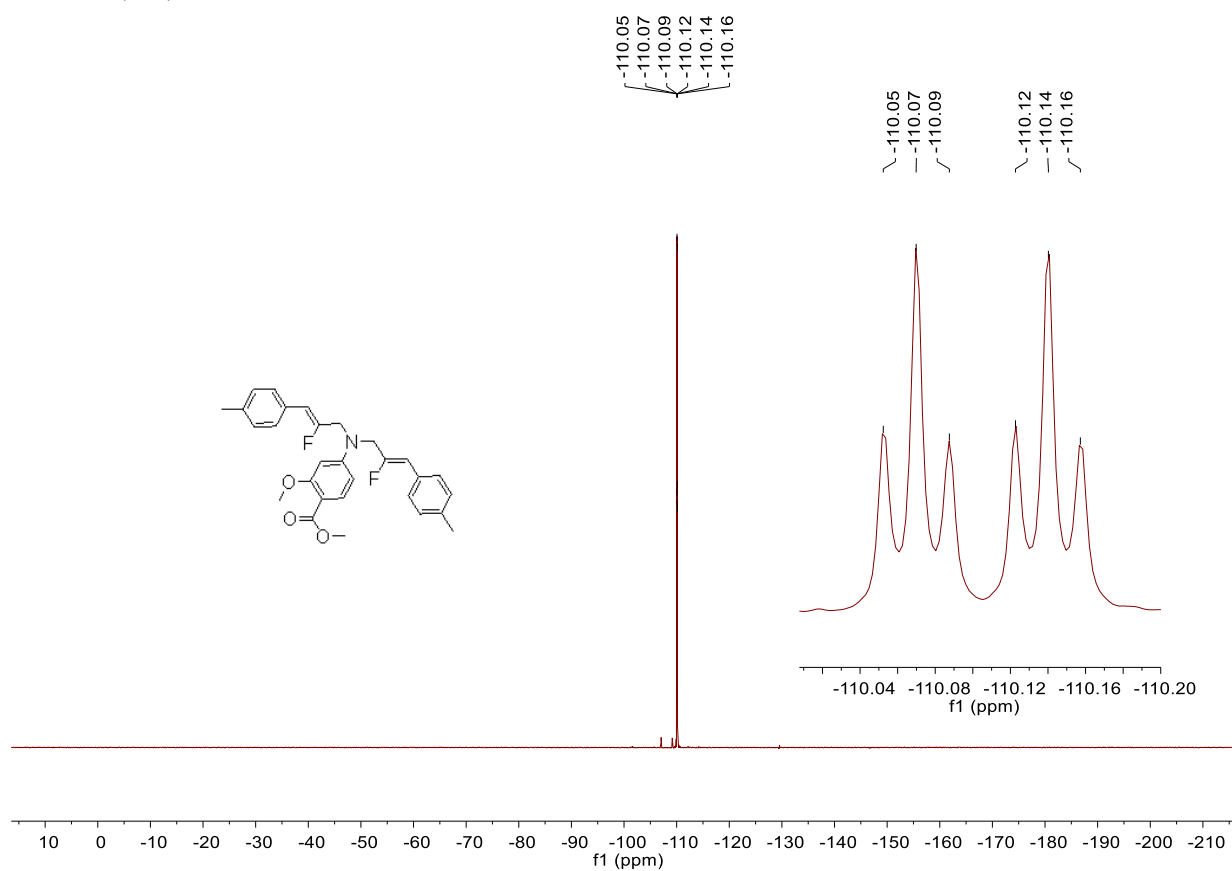

<sup>13</sup>C NMR (d29)

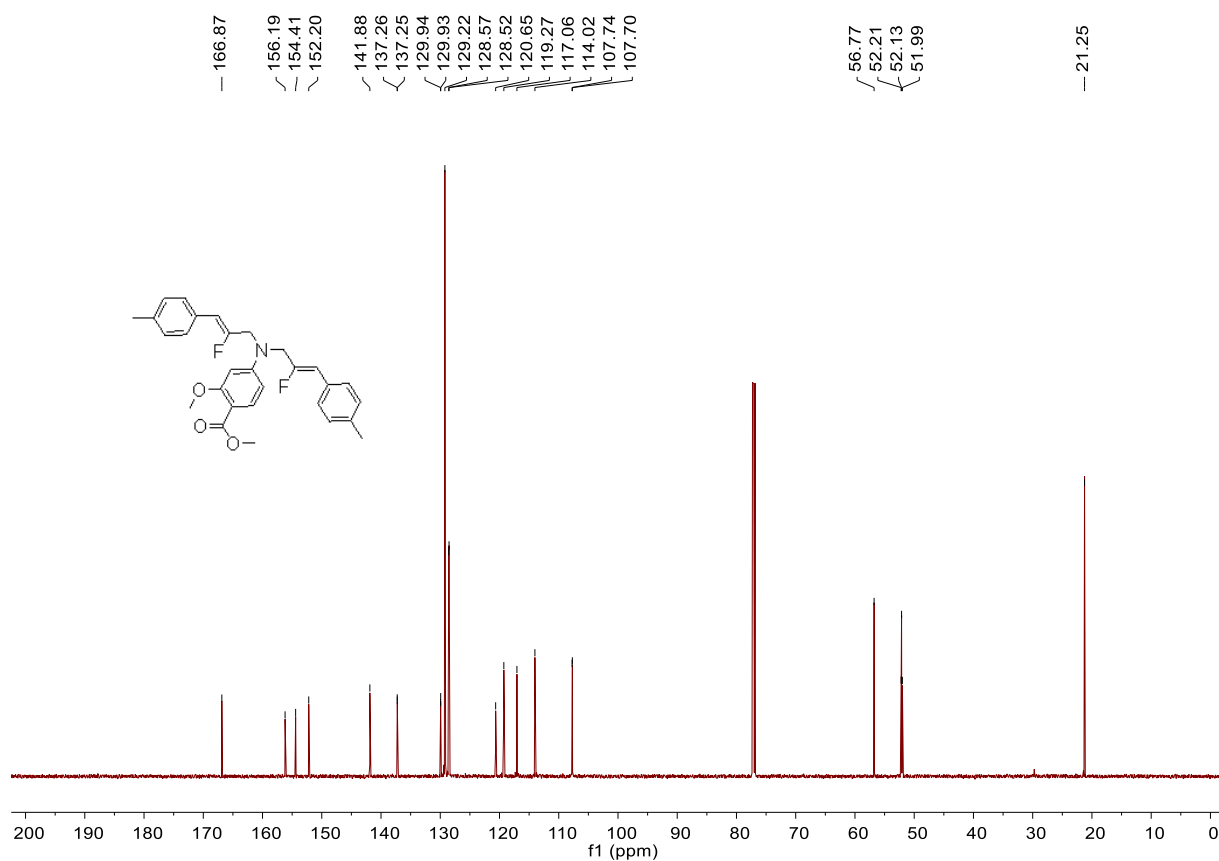

<sup>1</sup>H NMR (e1)

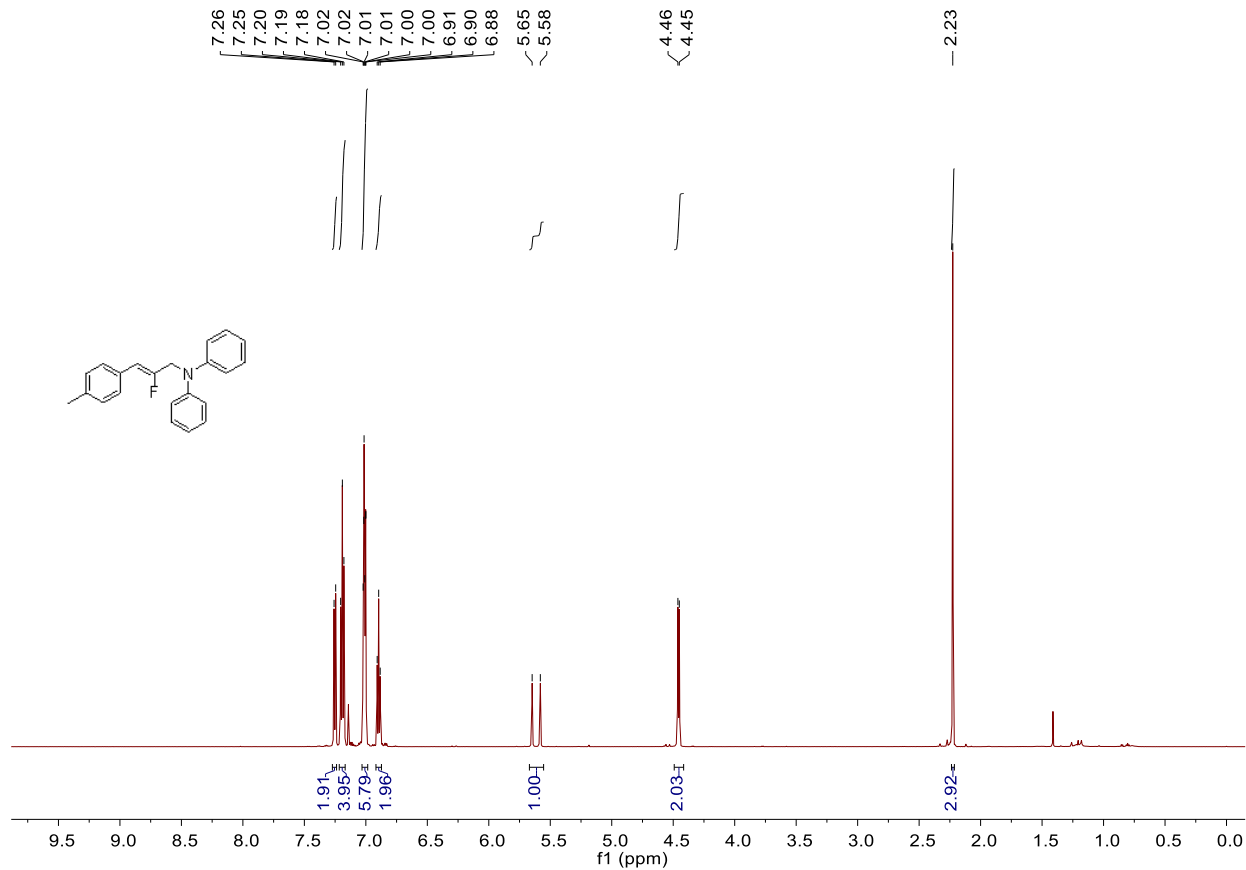



<sup>13</sup>F NMR (e1)

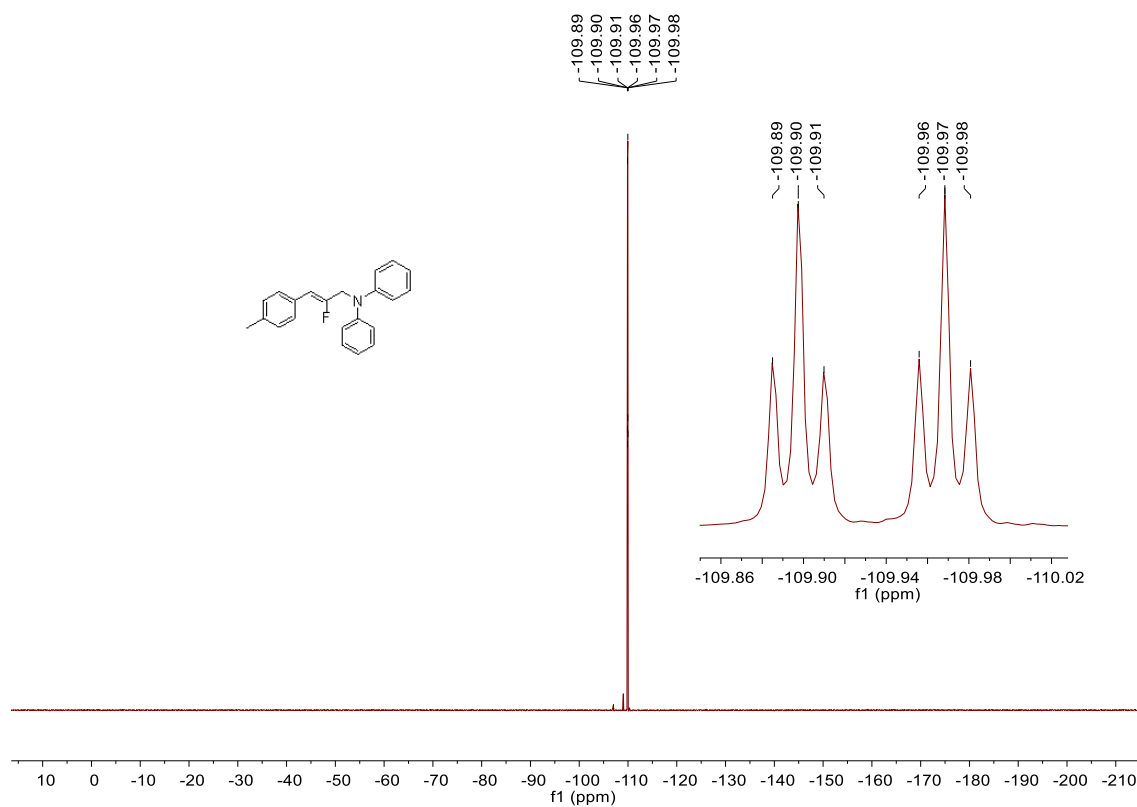

<sup>13</sup>C NMR (e1)

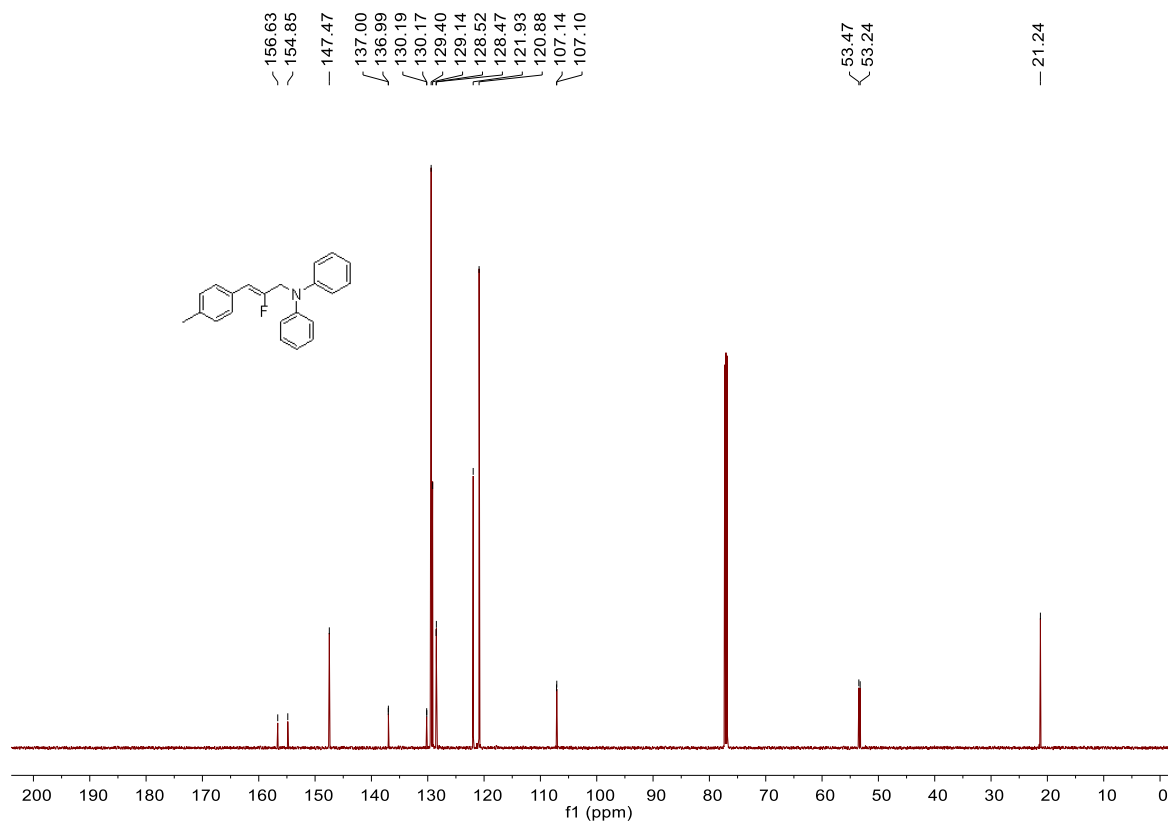

### <sup>1</sup>H NMR (d30)

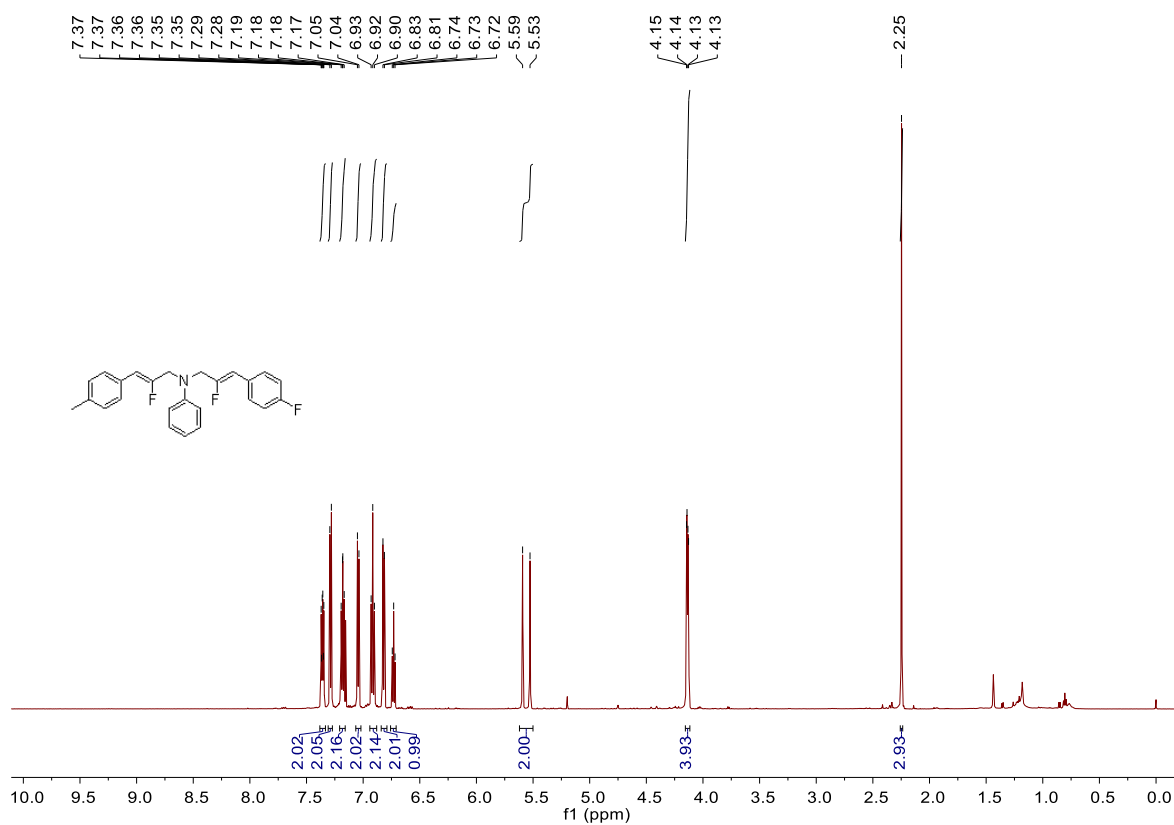

### <sup>13</sup>F NMR (d30)

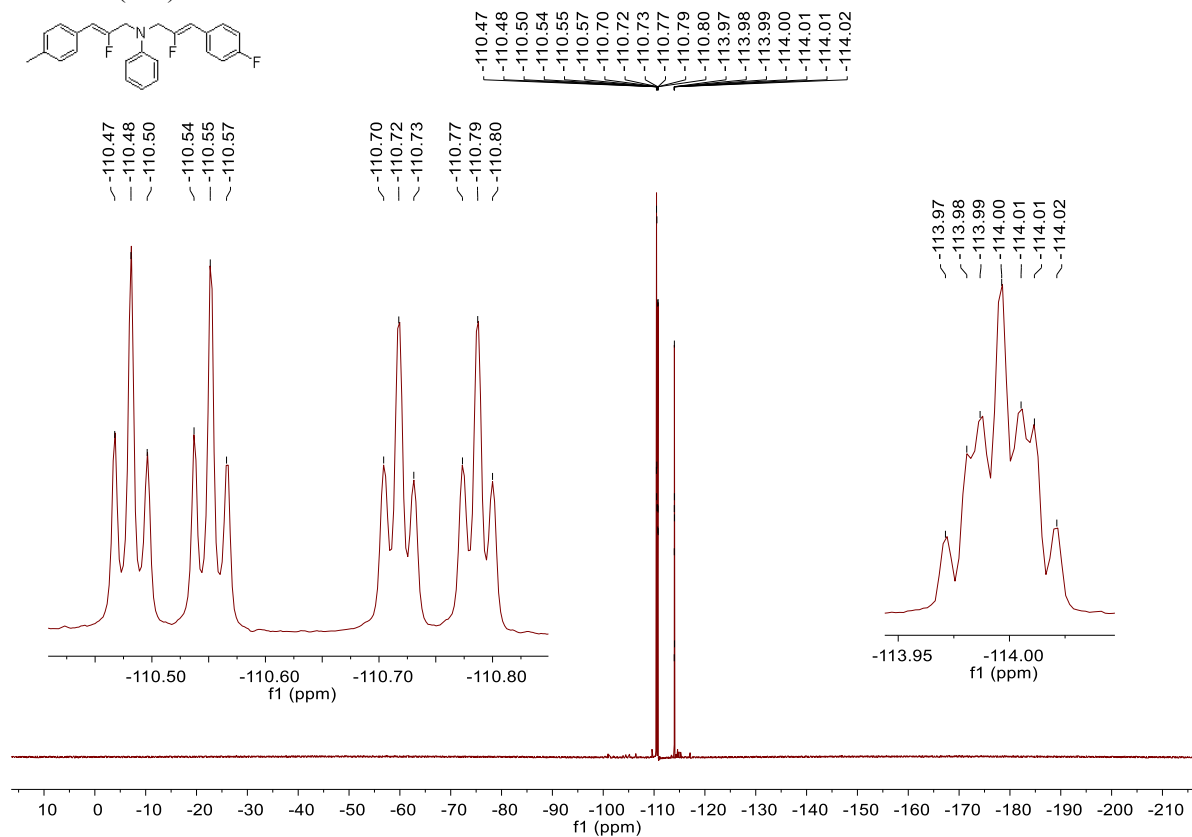

<sup>13</sup>C NMR (d30)

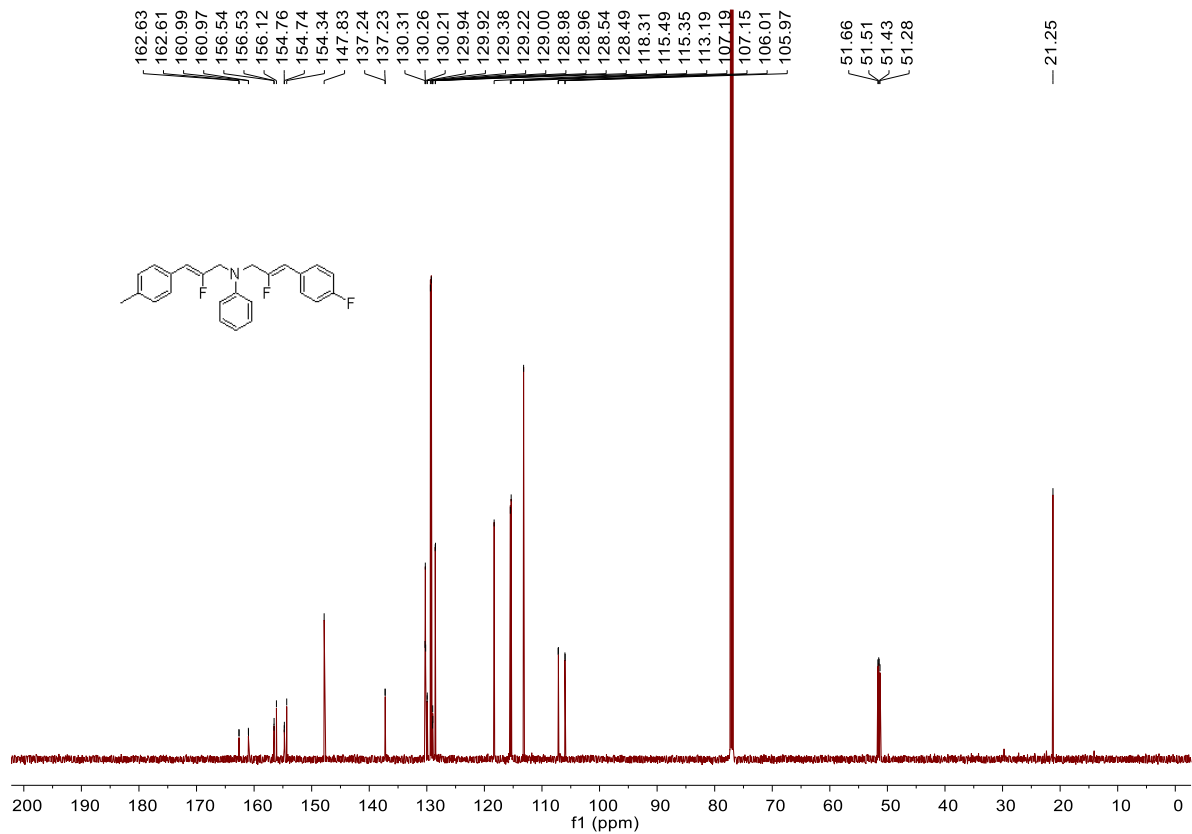

Supplement: d2cc05844h1.pdf [file d2cc05844h1.pdf]
